# Supplementary material for: Site- and structure-specific characterization ofN-glycoprotein markers of MCF-7 cancer stem cells using isotopic-labelling quantitativeN-glycoproteomics
Source: Royal Society of Chemistry journal article supplement (doi:10.1039/c9cc04114a), 2019-01-01
Supplement: c9cc04114a2.xlsx [file c9cc04114a2.xlsx]

## Sheet: Table S1
Dataset	Spectrum Index	RT(min)	Expm/z	Theom/z	z	IPMD(ppm)	Accession Number	Protein ID	Protein Name	Start	End	p-Seq	p-PTMs	GlycoSite	Composition	g-Linkage	Type	pg-nlog(P score)	NoBHs	Gly-bracket	GF score	Diagnostic ions
TR1	9775	43.7	893.706	893.707	3	-1.99688	P48740-2	MASP1_HUMAN	Isoform 2 of Mannan-binding lectin serine protease 1	529	538	SGAVNSSAAR	S1dEN5GlcNAc	533	N2H8F0S0	01Y41Y41M(31M21M21M31G)61M(31M)61M	Mannose	161.27	1	N,1;	0
TR1	9775	43.7	893.706	893.707	3	-1.99688	P48740-2	MASP1_HUMAN	Isoform 2 of Mannan-binding lectin serine protease 1	529	538	SGAVNSSAAR	S1dEN5GlcNAc	533	N2H8F0S0	01Y41Y41M(31M21M)61M(31M21M)61M21M	Mannose	153.3	2	N,1;	1	iI2-3-B/Y,C/Z,
TR1	9775	43.7	893.706	893.707	3	-1.99688	P48740-2	MASP1_HUMAN	Isoform 2 of Mannan-binding lectin serine protease 1	529	538	SGAVNSSAAR	S1dEN5GlcNAc	533	N2H8F0S0	01Y41Y41M(31M21M21M)61M(31M21M)61M	Mannose	153.3	2	N,1;	0
TR1	9775	43.7	894.04	894.035	3	5.16198	Q6DN90	IQEC1_HUMAN	IQ motif and SEC7 domain-containing protein 1	896	904	ESGNGTLSR	E1dEN4GlcNAc	899	N2H8F0S0	01Y41Y41M(31M21M21M31G)61M(31M)61M	Mannose	115.21	1	N,1;	0
TR1	9775	43.7	894.04	894.035	3	5.16198	Q6DN90	IQEC1_HUMAN	IQ motif and SEC7 domain-containing protein 1	896	904	ESGNGTLSR	E1dEN4GlcNAc	899	N2H8F0S0	01Y41Y41M(31M21M21M)61M(31M21M)61M	Mannose	100.11	1	N,1;	0
TR2	9832	43.91	894.041	894.039	3	1.73972	Q9Y4P3	TBL2_HUMAN	Transducin beta-like protein 2	418	425	RASNESTR	R1dEN4GlcNAc	421	N2H8F0S0	01Y41Y41M(31M21M21M31G)61M(31M)61M	Mannose	164.91	1	N,0;	0
TR2	9832	43.91	894.041	894.041	3	-0.983871	Q8NHU2	CFA61_HUMAN	Cilia- and flagella-associated protein 61	793	800	EVPNSSQR	E1dEN4GlcNAc	796	N2H8F0S0	01Y41Y41M(31M21M21M31G)61M(31M)61M	Mannose	158.98	1	N,0;	0
TR2	9832	43.91	894.041	894.039	3	1.73972	Q9Y4P3	TBL2_HUMAN	Transducin beta-like protein 2	418	425	RASNESTR	R1dEN4GlcNAc	421	N2H8F0S0	01Y41Y41M(31M21M21M)61M(31M21M)61M	Mannose	157.1	1	N,0;	0
TR2	9832	43.91	894.041	894.041	3	-0.983871	Q8NHU2	CFA61_HUMAN	Cilia- and flagella-associated protein 61	793	800	EVPNSSQR	E1dEN4GlcNAc	796	N2H8F0S0	01Y41Y41M(31M21M21M)61M(31M21M)61M	Mannose	151.22	1	N,0;	0
TR1	9831	43.98	1354.07	1354.07	2	2.91143	Q5JTV8	TOIP1_HUMAN	Torsin-1A-interacting protein 1	397	404	HLNSSHPR	H1dEN3GlcNAc	399	N2H8F0S0	01Y41Y41M(31M21M21M)61M(31M21M)61M	Mannose	126.56	1	N,0;	0
TR1	9831	43.98	1354.07	1354.07	2	2.91143	Q5JTV8	TOIP1_HUMAN	Torsin-1A-interacting protein 1	397	404	HLNSSHPR	H1dEN3GlcNAc	399	N2H8F0S0	01Y41Y41M(31M21M21M31G)61M(31M)61M	Mannose	123.69	1	N,0;	0
TR2	9881	44.16	1354.58	1354.56	2	8.83247	A6NGG8	PCARE_HUMAN	Photoreceptor cilium actin regulator	657	665	VSPSNTTSR	V1dEN5GlcNAc	661	N2H8F0S0	01Y41Y41M(31M21M)61M(31M21M)61M21M	Mannose	163.75	1	N,2;	1	iI2-3-B/Y,C/Z,
TR2	9881	44.16	1354.58	1354.56	2	8.83247	A6NGG8	PCARE_HUMAN	Photoreceptor cilium actin regulator	657	665	VSPSNTTSR	V1dEN5GlcNAc	661	N2H8F0S0	01Y41Y41M(31M21M21M)61M(31M21M)61M	Mannose	138.7	1	N,2;	0
TR2	9881	44.16	1356.08	1356.07	2	3.36375	Q5JTV8	TOIP1_HUMAN	Torsin-1A-interacting protein 1	397	404	HLNSSHPR	H1dEN3GlcNAc	399	N2H8F0S0	01Y41Y41M(31M21M)61M(31M21M)61M21M	Mannose	116.65	1	N,1;	1	iI2-3-B/Y,C/Z,
TR2	9881	44.16	1356.08	1356.09	2	-4.49124	Q12864	CAD17_HUMAN	Cadherin-17	545	552	YNASSFAK	Y1dEN2GlcNAcK8dE	546	N2H8F0S0	01Y41Y41M(31M21M)61M(31M21M)61M21M	Mannose	45.45	1	N,1;	1	iI2-3-B/Y,C/Z,
TR3	9917	44.29	894.041	894.033	3	9.22986	Q86X29	LSR_HUMAN	Lipolysis-stimulated lipoprotein receptor	573	580	DPRDNGSR	D1dEN5GlcNAc	577	N2H8F0S0	01Y41Y41M(31M21M21M31G)61M(31M)61M	Mannose	166.36	1	N,1;	0
TR3	9917	44.29	894.041	894.033	3	9.22986	Q86X29	LSR_HUMAN	Lipolysis-stimulated lipoprotein receptor	573	580	DPRDNGSR	D1dEN5GlcNAc	577	N2H8F0S0	01Y41Y41M(31M21M21M)61M(31M21M)61M	Mannose	158.4	1	N,1;	0
TR3	9919	44.3	840.023	840.024	3	-1.26407	P54756	EPHA5_HUMAN	Ephrin type-A receptor 5	944	951	TLVNASCR	T1dEN4GlcNAcC7Cam	947	N2H7F0S0	01Y41Y41M(31M21M)61M(31M21M)61M	Mannose	72.05	1	N,0;	0
TR3	9919	44.3	840.023	840.024	3	-1.26407	P54756	EPHA5_HUMAN	Ephrin type-A receptor 5	944	951	TLVNASCR	T1dEN4GlcNAcC7Cam	947	N2H7F0S0	01Y41Y41M(31M)61M(31M21M)61M21M	Mannose	60.3	2	N,0;	2	iI2-3-X15/C,iI2-3-X45/C,
TR3	9919	44.3	840.023	840.024	3	-1.26407	P54756	EPHA5_HUMAN	Ephrin type-A receptor 5	944	951	TLVNASCR	T1dEN4GlcNAcC7Cam	947	N2H7F0S0	01Y41Y41M(31M21M21M)61M(31M)61M	Mannose	60.3	2	N,0;	0
TR1	9985	44.76	1284.03	1284.03	2	1.56903	Q9H1C0	LPAR5_HUMAN	Lysophosphatidic acid receptor 5	319	326	TSATNGTR	T1dEN5GlcNAc	323	N2H8F0S0	01Y41Y41M(31M21M21M31G)61M(31M)61M	Mannose	162.39	1	N,0;	0
TR1	9985	44.76	1284.03	1284.03	2	1.56903	Q9H1C0	LPAR5_HUMAN	Lysophosphatidic acid receptor 5	319	326	TSATNGTR	T1dEN5GlcNAc	323	N2H8F0S0	01Y41Y41M(31M21M21M)61M(31M21M)61M	Mannose	159.53	1	N,0;	0
TR2	10039	44.95	1284.03	1284.03	2	2.42465	Q9H1C0	LPAR5_HUMAN	Lysophosphatidic acid receptor 5	319	326	TSATNGTR	T1dEN5GlcNAc	323	N2H8F0S0	01Y41Y41M(31M21M)61M(31M21M)61M21M	Mannose	122.93	2	N,0;	1	iI2-3-B/Y,C/Z,
TR1	10027	44.97	1307.55	1307.55	2	2.67242	Q96M02	CJ090_HUMAN	(E2-independent) E3 ubiquitin-conjugating enzyme FATS	86	91	QSLANR	Q1dEN5GlcNAc	90	N2H9F0S0	01Y41Y41M(31M21M21M31G31G)61M(31M)61M	Mannose	153.47	1	N,0;	0
TR3	10055	44.98	998.096	998.096	3	0.313863	Q15043	S39AE_HUMAN	Zinc transporter ZIP14	76	86	GNVTQHVQGHR	G1dEN2GlcNAc	77	N2H8F0S0	01Y41Y41M(31M21M21M)61M(31M21M)61M	Mannose	124.16	1	N,0;	0
TR3	10055	44.98	998.096	998.096	3	0.313863	Q15043	S39AE_HUMAN	Zinc transporter ZIP14	76	86	GNVTQHVQGHR	G1dEN2GlcNAc	77	N2H8F0S0	01Y41Y41M(31M21M)61M(31M21M)61M21M	Mannose	118.92	1	N,0;	0
TR3	10055	44.98	998.096	998.094	3	1.61635	Q96FT7	ASIC4_HUMAN	Acid-sensing ion channel 4	510	518	YNRNETYIR	Y1dEN4GlcNAc	513	N2H8F0S0	01Y41Y41M(31M21M21M)61M(31M21M)61M	Mannose	90.7	1	N,1;	0
TR3	10055	44.98	998.096	998.094	3	1.61635	Q96FT7	ASIC4_HUMAN	Acid-sensing ion channel 4	510	518	YNRNETYIR	Y1dEN4GlcNAc	513	N2H8F0S0	01Y41Y41M(31M21M)61M(31M21M)61M21M	Mannose	85.5	1	N,1;	0
TR3	10086	45.14	895.055	895.054	3	1.54711	Q9UBV2	SE1L1_HUMAN	Protein sel-1 homolog 1	213	220	AASMNHTK	A1dEN5GlcNAcK8dE	217	N2H8F0S0	01Y41Y41M(31M21M)61M(31M21M)61M21M	Mannose	95.77	1	N,1;	2	iI2-3-A15/Y,iI2-3-B/Y,C/Z,
TR3	10086	45.14	895.055	895.054	3	1.54711	Q9UBV2	SE1L1_HUMAN	Protein sel-1 homolog 1	213	220	AASMNHTK	A1dEN5GlcNAcK8dE	217	N2H8F0S0	01Y41Y41M(31M21M21M)61M(31M21M)61M	Mannose	90.8	1	N,1;	0
TR1	10069	45.18	818.016	818.02	3	-4.85511	P00533	EGFR_HUMAN	Epidermal growth factor receptor	528	533	NVSRGR	N1GlcNAc@dE	528	N2H8F0S0	01Y41Y41M(31M21M)61M(31M21M)61M21M	Mannose	75.2	1	N,0;	1	iI2-3-B/Y,C/Z,
TR1	10069	45.18	818.016	818.02	3	-4.85511	P00533	EGFR_HUMAN	Epidermal growth factor receptor	528	533	NVSRGR	N1GlcNAc@dE	528	N2H8F0S0	01Y41Y41M(31M21M21M)61M(31M21M)61M	Mannose	70.27	1	N,0;	0
TR1	10115	45.41	1226.52	1226.52	2	2.99155	P11279	LAMP1_HUMAN	Lysosome-associated membrane glycoprotein 1	320	326	AANGSLR	A1dEN3GlcNAc	322	N2H8F0S0	01Y41Y41M(31M21M21M31G)61M(31M)61M	Mannose	126.88	2	N,1;	0
TR2	10133	45.43	1203	1203	2	2.73416	Q9H1C0	LPAR5_HUMAN	Lysophosphatidic acid receptor 5	319	326	TSATNGTR	T1dEN5GlcNAc	323	N2H7F0S0	01Y41Y41M(31M21M)61M(31M21M)61M	Mannose	138.43	1	N,1;	1	iI2-3-B/Y,C/Z,
TR2	10133	45.43	1203	1203	2	2.73416	Q9H1C0	LPAR5_HUMAN	Lysophosphatidic acid receptor 5	319	326	TSATNGTR	T1dEN5GlcNAc	323	N2H7F0S0	01Y41Y41M(31M)61M(31M21M)61M21M	Mannose	129.6	1	N,1;	1	iI2-3-B/Y,C/Z,
TR1	10131	45.49	1121.97	1121.97	2	1.67488	Q96NL8	CH037_HUMAN	Protein C8orf37	87	94	SSGNTSVR	S1dEN4GlcNAc	90	N2H6F0S0	01Y41Y41M(31M)61M(31M21M)61M	Mannose	138.21	1	N,0;	2	iI2-3-X02/C,iI2-3-B/Y,C/Z,
TR1	10131	45.49	1121.97	1121.97	2	1.67488	Q9H1C0	LPAR5_HUMAN	Lysophosphatidic acid receptor 5	319	326	TSATNGTR	T1dEN5GlcNAc	323	N2H6F0S0	01Y41Y41M(31M)61M(31M21M)61M	Mannose	138.21	1	N,1;	2	iI2-3-X02/C,iI2-3-B/Y,C/Z,
TR1	10131	45.49	1121.97	1121.97	2	-0.14246	Q9Y262	EIF3L_HUMAN	Eukaryotic translation initiation factor 3 subunit L	550	555	FEELNR	F1dEN5GlcNAc	554	N2H6F0S0	01Y41Y41M(31M)61M(31M21M)61M	Mannose	136.6	1	N,0;	2	iI2-3-X02/C,iI2-3-B/Y,C/Z,
TR1	10131	45.49	1121.97	1121.97	2	1.67488	Q5T200	ZC3HD_HUMAN	Zinc finger CCCH domain-containing protein 13	1189	1196	SSSLGSNR	S1dEN7GlcNAc	1195	N2H6F0S0	01Y41Y41M(31M)61M(31M21M)61M	Mannose	136.02	1	N,0;	2	iI2-3-X02/C,iI2-3-B/Y,C/Z,
TR1	10131	45.49	1121.97	1121.97	2	1.67488	Q96NL8	CH037_HUMAN	Protein C8orf37	87	94	SSGNTSVR	S1dEN4GlcNAc	90	N2H6F0S0	01Y41Y41M(31M21M)61M(31M)61M	Mannose	135.41	1	N,0;	2	45AI3,iI2-3-B/Y,C/Z,
TR1	10131	45.49	1121.97	1121.97	2	-0.14246	Q9Y262	EIF3L_HUMAN	Eukaryotic translation initiation factor 3 subunit L	550	555	FEELNR	F1dEN5GlcNAc	554	N2H6F0S0	01Y41Y41M(31M21M)61M(31M)61M	Mannose	133.8	1	N,0;	2	45AI3,iI2-3-B/Y,C/Z,
TR1	10131	45.49	1121.97	1121.97	2	4.61703	Q96CN4	EVI5L_HUMAN	EVI5-like protein	57	63	SMNGSRR	S1dEN3GlcNAc	59	N2H6F0S0	01Y41Y41M(31M)61M(31M21M)61M	Mannose	133.48	2	N,0;	2	iI2-3-X02/C,iI2-3-B/Y,C/Z,
TR1	10131	45.49	1121.97	1121.97	2	4.61703	Q96CN4	EVI5L_HUMAN	EVI5-like protein	57	63	SMNGSRR	S1dEN3GlcNAc	59	N2H6F0S0	01Y41Y41M(31M21M)61M(31M)61M	Mannose	133.48	2	N,0;	2	45AI3,iI2-3-B/Y,C/Z,
TR1	10131	45.49	1121.97	1121.97	2	1.67488	Q5T200	ZC3HD_HUMAN	Zinc finger CCCH domain-containing protein 13	1189	1196	SSSLGSNR	S1dEN7GlcNAc	1195	N2H6F0S0	01Y41Y41M(31M21M)61M(31M)61M	Mannose	133.22	1	N,0;	2	45AI3,iI2-3-B/Y,C/Z,
TR1	10131	45.49	1122.48	1122.47	2	6.16849	Q9H4E7	DEFI6_HUMAN	Differentially expressed in FDCP 6 homolog	588	594	WGSQGNR	W1dEN6GlcNAc	593	N2H6F0S0	01Y41Y41M(31M)61M(31M21M)61M	Mannose	110.33	2	N,1;	2	iI2-3-X02/C,iI2-3-B/Y,C/Z,
TR1	10131	45.49	1122.48	1122.47	2	6.16849	Q9H4E7	DEFI6_HUMAN	Differentially expressed in FDCP 6 homolog	588	594	WGSQGNR	W1dEN6GlcNAc	593	N2H6F0S0	01Y41Y41M(31M21M)61M(31M)61M	Mannose	110.33	2	N,1;	2	45AI3,iI2-3-B/Y,C/Z,
TR2	10150	45.51	1307.55	1307.55	2	2.01892	P11279	LAMP1_HUMAN	Lysosome-associated membrane glycoprotein 1	320	326	AANGSLR	A1dEN3GlcNAc	322	N2H9F0S0	01Y41Y41M(31M21M21M)61M(31M21M)61M21M	Mannose	198.94	1	N,2;	0
TR2	10150	45.51	1307.55	1307.55	2	2.01892	A6NHM9	MOXD2_HUMAN	Putative DBH-like monooxygenase protein 2	404	409	NGTQLR	N1GlcNAc@dE	404	N2H9F0S0	01Y41Y41M(31M21M21M)61M(31M21M)61M21M	Mannose	189.33	1	N,0;	0
TR2	10150	45.51	1307.55	1307.55	2	2.01892	Q96M02	CJ090_HUMAN	(E2-independent) E3 ubiquitin-conjugating enzyme FATS	86	91	QSLANR	Q1dEN5GlcNAc	90	N2H9F0S0	01Y41Y41M(31M21M21M)61M(31M21M)61M21M	Mannose	189.33	1	N,0;	0
TR2	10150	45.51	1307.55	1307.55	2	2.01892	P11532	DMD_HUMAN	Dystrophin	2897	2902	AQNVTR	A1dEN3GlcNAc	2899	N2H9F0S0	01Y41Y41M(31M21M21M)61M(31M21M)61M21M	Mannose	187.04	1	N,1;	0
TR2	10150	45.51	1307.55	1307.55	2	2.01892	A6NHM9	MOXD2_HUMAN	Putative DBH-like monooxygenase protein 2	404	409	NGTQLR	N1GlcNAc@dE	404	N2H9F0S0	01Y41Y41M(31M21M21M31G)61M(31M21M)61M	Mannose	183.62	1	N,0;	0
TR2	10150	45.51	1307.55	1307.55	2	2.01892	Q96M02	CJ090_HUMAN	(E2-independent) E3 ubiquitin-conjugating enzyme FATS	86	91	QSLANR	Q1dEN5GlcNAc	90	N2H9F0S0	01Y41Y41M(31M21M21M31G)61M(31M21M)61M	Mannose	183.62	1	N,0;	0
TR2	10163	45.57	1121.97	1121.97	2	2.11007	Q9H1C0	LPAR5_HUMAN	Lysophosphatidic acid receptor 5	319	326	TSATNGTR	T1dEN5GlcNAc	323	N2H6F0S0	01Y41Y41M(31M21M)61M(31M)61M	Mannose	137.59	2	N,1;	1	iI2-3-B/Y,C/Z,
TR2	10163	45.57	1121.47	1121.48	2	-3.37104	Q9UQ49	NEUR3_HUMAN	Sialidase-3	246	251	TPNRCR	T1dEN3GlcNAcC5Cam	248	N2H6F0S0	01Y41Y41M(31M)61M(31M21M)61M	Mannose	131.67	2	N,0;	3	iI2-3-X02/B,iI2-3-X02/C,iI2-3-B/Y,C/Z,
TR2	10163	45.57	1121.47	1121.48	2	-3.37104	Q9UQ49	NEUR3_HUMAN	Sialidase-3	246	251	TPNRCR	T1dEN3GlcNAcC5Cam	248	N2H6F0S0	01Y41Y41M(31M21M)61M(31M)61M	Mannose	131.67	2	N,0;	1	iI2-3-B/Y,C/Z,
TR3	10269	46.06	1284.03	1284.03	2	-0.213555	Q9UQ49	NEUR3_HUMAN	Sialidase-3	246	251	TPNRCR	T1dEN3GlcNAcC5Cam	248	N2H8F0S0	01Y41Y41M(31M21M21M31G)61M(31M)61M	Mannose	160.48	1	N,0;	0
TR3	10269	46.06	1284.03	1284.03	2	-0.213555	Q9UQ49	NEUR3_HUMAN	Sialidase-3	246	251	TPNRCR	T1dEN3GlcNAcC5Cam	248	N2H8F0S0	01Y41Y41M(31M21M21M)61M(31M21M)61M	Mannose	157.62	1	N,0;	0
TR3	10269	46.06	1284.53	1284.52	2	8.63027	Q9H4E7	DEFI6_HUMAN	Differentially expressed in FDCP 6 homolog	588	594	WGSQGNR	W1dEN6GlcNAc	593	N2H8F0S0	01Y41Y41M(31M21M21M)61M(31M21M)61M	Mannose	130.75	2	N,0;	0
TR3	10269	46.06	1284.53	1284.52	2	8.63027	Q9H4E7	DEFI6_HUMAN	Differentially expressed in FDCP 6 homolog	588	594	WGSQGNR	W1dEN6GlcNAc	593	N2H8F0S0	01Y41Y41M(31M21M21M31G)61M(31M)61M	Mannose	130.75	2	N,0;	0
TR3	10269	46.06	1284.53	1284.52	2	8.63027	Q9H4E7	DEFI6_HUMAN	Differentially expressed in FDCP 6 homolog	588	594	WGSQGNR	W1dEN6GlcNAc	593	N2H8F0S0	01Y41Y41M(31M21M)61M(31M21M)61M21M	Mannose	125.23	1	N,0;	1	iI2-3-B/Y,C/Z,
TR3	10422	46.78	1307.55	1307.55	2	2.29899	P11279	LAMP1_HUMAN	Lysosome-associated membrane glycoprotein 1	320	326	AANGSLR	A1dEN3GlcNAc	322	N2H9F0S0	01Y41Y41M(31M21M21M31G)61M(31M21M)61M	Mannose	197.52	2	N,1;	0
TR3	10422	46.78	1307.55	1307.55	2	2.29899	P11532	DMD_HUMAN	Dystrophin	2897	2902	AQNVTR	A1dEN3GlcNAc	2899	N2H9F0S0	01Y41Y41M(31M21M21M31G)61M(31M21M)61M	Mannose	185.18	2	N,1;	0
TR3	10422	46.78	1307.55	1307.55	2	2.29899	P11279	LAMP1_HUMAN	Lysosome-associated membrane glycoprotein 1	320	326	AANGSLR	A1dEN3GlcNAc	322	N2H9F0S0	01Y41Y41M(31M21M21M31G31G)61M(31M)61M	Mannose	183.25	1	N,1;	0
TR3	10422	46.78	1307.55	1307.55	2	2.29899	P11532	DMD_HUMAN	Dystrophin	2897	2902	AQNVTR	A1dEN3GlcNAc	2899	N2H9F0S0	01Y41Y41M(31M21M21M31G31G)61M(31M)61M	Mannose	170.91	1	N,1;	0
TR3	10449	46.91	1226.52	1226.52	2	1.9963	P11279	LAMP1_HUMAN	Lysosome-associated membrane glycoprotein 1	320	326	AANGSLR	A1dEN3GlcNAc	322	N2H8F0S0	01Y41Y41M(31M21M)61M(31M21M)61M21M	Mannose	169.24	1	N,2;	1	iI2-3-B/Y,C/Z,
TR3	10449	46.91	1226.52	1226.52	2	1.9963	P11279	LAMP1_HUMAN	Lysosome-associated membrane glycoprotein 1	320	326	AANGSLR	A1dEN3GlcNAc	322	N2H8F0S0	01Y41Y41M(31M21M21M)61M(31M21M)61M	Mannose	163.34	1	N,2;	0
TR3	10449	46.91	1226.52	1226.52	2	1.9963	P11532	DMD_HUMAN	Dystrophin	2897	2902	AQNVTR	A1dEN3GlcNAc	2899	N2H8F0S0	01Y41Y41M(31M21M)61M(31M21M)61M21M	Mannose	159.09	1	N,1;	1	iI2-3-B/Y,C/Z,
TR3	10449	46.91	1226.52	1226.52	2	1.9963	A6NHM9	MOXD2_HUMAN	Putative DBH-like monooxygenase protein 2	404	409	NGTQLR	N1GlcNAc@dE	404	N2H8F0S0	01Y41Y41M(31M21M)61M(31M21M)61M21M	Mannose	159.09	1	N,0;	1	iI2-3-B/Y,C/Z,
TR3	10449	46.91	1226.52	1226.52	2	1.9963	P11532	DMD_HUMAN	Dystrophin	2897	2902	AQNVTR	A1dEN3GlcNAc	2899	N2H8F0S0	01Y41Y41M(31M21M21M)61M(31M21M)61M	Mannose	153.19	1	N,1;	0
TR3	10449	46.91	1226.52	1226.52	2	1.9963	A6NHM9	MOXD2_HUMAN	Putative DBH-like monooxygenase protein 2	404	409	NGTQLR	N1GlcNAc@dE	404	N2H8F0S0	01Y41Y41M(31M21M21M)61M(31M21M)61M	Mannose	153.19	1	N,0;	0
TR3	10543	47.36	1122.48	1122.47	2	3.94257	Q8WXH0	SYNE2_HUMAN	Nesprin-2	4630	4636	AGLDYNR	A1dEN6GlcNAc	4635	N2H6F0S0	01Y41Y41M(31M)61M(31M21M)61M	Mannose	92.32	1	N,0;	2	iI2-3-X02/C,iI2-3-B/Y,C/Z,
TR3	10543	47.36	1122.48	1122.47	2	3.94257	Q8WXH0	SYNE2_HUMAN	Nesprin-2	4630	4636	AGLDYNR	A1dEN6GlcNAc	4635	N2H6F0S0	01Y41Y41M(31M21M)61M(31M)61M	Mannose	86.96	1	N,0;	1	iI2-3-B/Y,C/Z,
TR3	10620	47.7	1122.48	1122.47	2	7.58226	O60936-1	NOL3_HUMAN	Isoform 1 of Nucleolar protein 3	183	188	NWSQNR	N1dEN5GlcNAc	187	N2H6F0S0	01Y41Y41M(31M)61M(31M21M)61M	Mannose	78.67	2	N,1;	1	iI2-3-B/Y,C/Z,
TR3	10620	47.7	1122.48	1122.47	2	7.58226	O60936-1	NOL3_HUMAN	Isoform 1 of Nucleolar protein 3	183	188	NWSQNR	N1dEN5GlcNAc	187	N2H6F0S0	01Y41Y41M(31M21M)61M(31M)61M	Mannose	78.67	2	N,1;	1	iI2-3-B/Y,C/Z,
TR1	10886	49.05	1300.05	1300.05	2	-1.24398	Q9H582	ZN644_HUMAN	Zinc finger protein 644	1193	1199	IHNQTAR	I1dEN3GlcNAc	1195	N2H8F0S0	01Y41Y41M(31M21M21M31G)61M(31M)61M	Mannose	117.37	2	N,0;	0
TR1	10916	49.19	1379.07	1379.07	2	2.37671	P50454	SERPH_HUMAN	Serpin H1	117	124	SLSNSTAR	S1dEN4GlcNAc	120	N2H9F0S0	01Y41Y41M(31M21M21M31G)61M(31M21M)61M	Mannose	88.73	1	N,0;	0
TR1	10916	49.19	1379.07	1379.07	2	2.37671	P50454	SERPH_HUMAN	Serpin H1	117	124	SLSNSTAR	S1dEN4GlcNAc	120	N2H9F0S0	01Y41Y41M(31M21M21M)61M(31M21M)61M21M	Mannose	85.84	1	N,0;	0
TR1	10965	49.42	1300.05	1300.05	2	2.00446	P50454	SERPH_HUMAN	Serpin H1	117	124	SLSNSTAR	S1dEN4GlcNAc	120	N2H8F0S0	01Y41Y41M(31M21M21M31G)61M(31M)61M	Mannose	163.26	2	N,2;	0
TR1	10965	49.42	1300.05	1300.05	2	2.00446	Q8IYU4	UBQLN_HUMAN	Ubiquilin-like protein	25	32	NISSSATR	N1GlcNAc@dE	25	N2H8F0S0	01Y41Y41M(31M21M21M31G)61M(31M)61M	Mannose	154.19	2	N,0;	0
TR1	11002	49.58	1219.02	1219.02	2	1.68115	P50454	SERPH_HUMAN	Serpin H1	117	124	SLSNSTAR	S1dEN4GlcNAc	120	N2H7F0S0	01Y41Y41M(31M)61M(31M21M)61M21M	Mannose	117.97	1	N,1;	1	iI2-3-B/Y,C/Z,
TR2	11040	49.74	1300.05	1300.05	2	2.66174	P50454	SERPH_HUMAN	Serpin H1	117	124	SLSNSTAR	S1dEN4GlcNAc	120	N2H8F0S0	01Y41Y41M(31M21M)61M(31M21M)61M21M	Mannose	183.03	1	N,2;	1	iI2-3-B/Y,C/Z,
TR2	11040	49.74	1300.05	1300.05	2	2.66174	P50454	SERPH_HUMAN	Serpin H1	117	124	SLSNSTAR	S1dEN4GlcNAc	120	N2H8F0S0	01Y41Y41M(31M21M21M)61M(31M21M)61M	Mannose	180.24	1	N,2;	0
TR2	11040	49.74	1300.05	1300.05	2	-0.398914	Q9H582	ZN644_HUMAN	Zinc finger protein 644	1193	1199	IHNQTAR	I1dEN3GlcNAc	1195	N2H8F0S0	01Y41Y41M(31M21M)61M(31M21M)61M21M	Mannose	169.37	1	N,0;	1	iI2-3-B/Y,C/Z,
TR2	11040	49.74	1300.05	1300.05	2	2.66174	Q8IYU4	UBQLN_HUMAN	Ubiquilin-like protein	25	32	NISSSATR	N1GlcNAc@dE	25	N2H8F0S0	01Y41Y41M(31M21M)61M(31M21M)61M21M	Mannose	169.18	1	N,0;	1	iI2-3-B/Y,C/Z,
TR2	11040	49.74	1300.05	1300.05	2	-0.398914	Q9H582	ZN644_HUMAN	Zinc finger protein 644	1193	1199	IHNQTAR	I1dEN3GlcNAc	1195	N2H8F0S0	01Y41Y41M(31M21M21M)61M(31M21M)61M	Mannose	166.58	1	N,0;	0
TR2	11040	49.74	1300.05	1300.05	2	2.66174	Q8IYU4	UBQLN_HUMAN	Ubiquilin-like protein	25	32	NISSSATR	N1GlcNAc@dE	25	N2H8F0S0	01Y41Y41M(31M21M21M)61M(31M21M)61M	Mannose	166.39	1	N,0;	0
TR2	11155	50.27	1219.02	1219.03	2	-1.08225	Q9H582	ZN644_HUMAN	Zinc finger protein 644	1193	1199	IHNQTAR	I1dEN3GlcNAc	1195	N2H7F0S0	01Y41Y41M(31M21M21M)61M(31M)61M	Mannose	105.97	2	N,0;	1	iI2-3-B/Y,C/Z,iIII2-3-B/Y,C/Z,
TR1	11160	50.31	1219.02	1219.02	2	0.679772	P50454	SERPH_HUMAN	Serpin H1	117	124	SLSNSTAR	S1dEN4GlcNAc	120	N2H7F0S0	01Y41Y41M(31M21M21M)61M(31M)61M	Mannose	117.45	2	N,0;	0
TR1	11160	50.31	1219.02	1219.02	2	0.679772	Q8IYU4	UBQLN_HUMAN	Ubiquilin-like protein	25	32	NISSSATR	N1GlcNAc@dE	25	N2H7F0S0	01Y41Y41M(31M21M21M)61M(31M)61M	Mannose	112.54	2	N,0;	0
TR2	11352	51.17	1138	1138	2	-1.75387	Q9H582	ZN644_HUMAN	Zinc finger protein 644	1193	1199	IHNQTAR	I1dEN3GlcNAc	1195	N2H6F0S0	01Y41Y41M(31M)61M(31M21M)61M	Mannose	114.54	1	N,0;	1	iI2-3-B/Y,C/Z,
TR2	11352	51.17	1138	1137.99	2	9.5582	Q8IVL0	NAV3_HUMAN	Neuron navigator 3	1605	1612	SLGNMTGR	S1dEN4GlcNAc	1608	N2H6F0S0	01Y41Y41M(31M)61M(31M21M)61M	Mannose	106.05	1	N,0;	1	iI2-3-B/Y,C/Z,
TR2	11352	51.17	1138	1138	2	-1.75387	Q9H582	ZN644_HUMAN	Zinc finger protein 644	1193	1199	IHNQTAR	I1dEN3GlcNAc	1195	N2H6F0S0	01Y41Y41M(31M21M)61M(31M)61M	Mannose	103.49	1	N,0;	1	iI2-3-B/Y,C/Z,
TR2	11352	51.17	1138	1137.99	2	9.5582	Q8IVL0	NAV3_HUMAN	Neuron navigator 3	1605	1612	SLGNMTGR	S1dEN4GlcNAc	1608	N2H6F0S0	01Y41Y41M(31M21M)61M(31M)61M	Mannose	103.3	1	N,0;	1	iI2-3-B/Y,C/Z,
TR3	11701	52.47	867.035	867.034	3	1.24954	Q9NR82	KCNQ5_HUMAN	Potassium voltage-gated channel subfamily KQT member 5	679	686	STSANISR	S1dEN5GlcNAc	683	N2H8F0S0	01Y41Y41M(31M21M)61M(31M21M)61M21M	Mannose	75.68	2	N,1;	1	iI2-3-B/Y,C/Z,
TR3	11701	52.47	867.035	867.034	3	1.24954	Q9NR82	KCNQ5_HUMAN	Potassium voltage-gated channel subfamily KQT member 5	679	686	STSANISR	S1dEN5GlcNAc	683	N2H8F0S0	01Y41Y41M(31M21M21M)61M(31M21M)61M	Mannose	75.68	2	N,1;	0
TR3	11701	52.47	867.035	867.034	3	1.24954	Q9NR82	KCNQ5_HUMAN	Potassium voltage-gated channel subfamily KQT member 5	679	686	STSANISR	S1dEN5GlcNAc	683	N2H8F0S0	01Y41Y41M(31M21M21M31G)61M(31M)61M	Mannose	73.1	1	N,1;	0
TR3	11898	53.36	1219.02	1219.02	2	2.88281	P50454	SERPH_HUMAN	Serpin H1	117	124	SLSNSTAR	S1dEN4GlcNAc	120	N2H7F0S0	01Y41Y41M(31M21M)61M(31M21M)61M	Mannose	122.92	1	N,0;	1	iI2-3-B/Y,C/Z,
TR3	11898	53.36	1219.02	1219.03	2	-0.381286	Q9H582	ZN644_HUMAN	Zinc finger protein 644	1193	1199	IHNQTAR	I1dEN3GlcNAc	1195	N2H7F0S0	01Y41Y41M(31M21M)61M(31M21M)61M	Mannose	115.97	1	N,0;	1	iI2-3-B/Y,C/Z,
TR3	11898	53.36	1219.02	1219.02	2	2.88281	Q8IYU4	UBQLN_HUMAN	Ubiquilin-like protein	25	32	NISSSATR	N1GlcNAc@dE	25	N2H7F0S0	01Y41Y41M(31M21M)61M(31M21M)61M	Mannose	115.77	1	N,0;	1	iI2-3-B/Y,C/Z,
TR3	11898	53.36	1219.02	1219.03	2	-0.381286	Q9H582	ZN644_HUMAN	Zinc finger protein 644	1193	1199	IHNQTAR	I1dEN3GlcNAc	1195	N2H7F0S0	01Y41Y41M(31M)61M(31M21M)61M21M	Mannose	110.28	1	N,0;	1	iI2-3-B/Y,C/Z,
TR3	11898	53.36	1219.02	1219.02	2	2.88281	Q8IYU4	UBQLN_HUMAN	Ubiquilin-like protein	25	32	NISSSATR	N1GlcNAc@dE	25	N2H7F0S0	01Y41Y41M(31M)61M(31M21M)61M21M	Mannose	110.08	1	N,0;	1	iI2-3-B/Y,C/Z,
TR3	12076	54.16	1135.99	1135.99	2	1.95194	P50454	SERPH_HUMAN	Serpin H1	117	124	SLSNSTAR	S1dEN4GlcNAc	120	N2H6F0S0	01Y41Y41M(31M21M)61M(31M)61M	Mannose	154.92	1	N,2;	1	iI2-3-B/Y,C/Z,
TR3	12076	54.16	1135.99	1135.99	2	1.95194	P50454	SERPH_HUMAN	Serpin H1	117	124	SLSNSTAR	S1dEN4GlcNAc	120	N2H6F0S0	01Y41Y41M(31M)61M(31M21M)61M	Mannose	152.05	1	N,2;	1	iI2-3-B/Y,C/Z,
TR3	12076	54.16	1135.99	1135.99	2	1.95194	Q8IYU4	UBQLN_HUMAN	Ubiquilin-like protein	25	32	NISSSATR	N1GlcNAc@dE	25	N2H6F0S0	01Y41Y41M(31M21M)61M(31M)61M	Mannose	138.26	1	N,0;	1	iI2-3-B/Y,C/Z,
TR3	12076	54.16	1135.99	1135.99	2	1.95194	Q9NR82	KCNQ5_HUMAN	Potassium voltage-gated channel subfamily KQT member 5	679	686	STSANISR	S1dEN5GlcNAc	683	N2H6F0S0	01Y41Y41M(31M21M)61M(31M)61M	Mannose	136.23	1	N,1;	1	iI2-3-B/Y,C/Z,
TR3	12076	54.16	1135.99	1135.99	2	1.95194	Q8IYU4	UBQLN_HUMAN	Ubiquilin-like protein	25	32	NISSSATR	N1GlcNAc@dE	25	N2H6F0S0	01Y41Y41M(31M)61M(31M21M)61M	Mannose	135.39	1	N,0;	1	iI2-3-B/Y,C/Z,
TR3	12076	54.16	1135.99	1135.99	2	1.95194	Q9NR82	KCNQ5_HUMAN	Potassium voltage-gated channel subfamily KQT member 5	679	686	STSANISR	S1dEN5GlcNAc	683	N2H6F0S0	01Y41Y41M(31M)61M(31M21M)61M	Mannose	133.36	1	N,1;	1	iI2-3-B/Y,C/Z,
TR2	12153	54.73	1098.48	1098.48	2	6.72053	Q9NYI0	PSD3_HUMAN	PH and SEC7 domain-containing protein 3	1028	1033	RNVSER	R1dEN2GlcNAc	1029	N2H6F0S0	01Y41Y41M(31M)61M(31M21M)61M	Mannose	91.24	1	N,0;	1	iI2-3-B/Y,C/Z,
TR2	12153	54.73	1098.48	1098.48	2	6.72053	Q9NYI0	PSD3_HUMAN	PH and SEC7 domain-containing protein 3	1028	1033	RNVSER	R1dEN2GlcNAc	1029	N2H6F0S0	01Y41Y41M(31M21M)61M(31M)61M	Mannose	88.47	1	N,0;	1	iI2-3-B/Y,C/Z,
TR2	12153	54.73	1097.98	1097.97	2	9.81674	Q8WXA9	SREK1_HUMAN	Splicing regulatory glutamine/lysine-rich protein 1	221	226	SHNRSR	S1dEN3GlcNAc	223	N2H6F0S0	01Y41Y41M(31M)61M(31M21M)61M	Mannose	64.56	1	N,1;	1	iI2-3-B/Y,C/Z,
TR2	12153	54.73	1097.98	1097.97	2	9.81674	Q8WXA9	SREK1_HUMAN	Splicing regulatory glutamine/lysine-rich protein 1	219	224	SRSHNR	S1dEN5GlcNAc	223	N2H6F0S0	01Y41Y41M(31M)61M(31M21M)61M	Mannose	64.56	1	N,1;	1	iI2-3-B/Y,C/Z,
TR2	12153	54.73	1097.98	1097.97	2	9.81674	Q8WXA9	SREK1_HUMAN	Splicing regulatory glutamine/lysine-rich protein 1	221	226	SHNRSR	S1dEN3GlcNAc	223	N2H6F0S0	01Y41Y41M(31M21M)61M(31M)61M	Mannose	61.92	1	N,1;	1	iI2-3-B/Y,C/Z,
TR2	12153	54.73	1097.98	1097.97	2	9.81674	Q8WXA9	SREK1_HUMAN	Splicing regulatory glutamine/lysine-rich protein 1	219	224	SRSHNR	S1dEN5GlcNAc	223	N2H6F0S0	01Y41Y41M(31M21M)61M(31M)61M	Mannose	61.92	1	N,1;	1	iI2-3-B/Y,C/Z,
TR3	12466	55.93	1056.47	1056.47	2	2.69151	P50454	SERPH_HUMAN	Serpin H1	117	124	SLSNSTAR	S1dEN4GlcNAc	120	N2H5F0S0	01Y41Y41M(31M)61M(31M)61M	Mannose	82.74	1	N,0;	20	BI1,BII1,BIII1,iI3-4-B/Y,C/Z,iII3-4-B/Y,C/Z,iIII3-3-B/Y,C/Z,iI2-3-B/Y,C/Z,YI1,YI2,iI3III3Y,iII3III3Y,YI3,iI2-4-B/Y,C/Z,iII2-4-B/Y,C/Z,iIII2-3-B/Y,C/Z,iI4II4Y,iI4III3Y,iII4III3Y,YI4,YII4,YIII3,02XI1,BI4,MH,34XI1,ZI1,YI1,YI2,iI3III3Y,iII3III3Y,YI3,iI4II4Y,i
TR3	12466	55.93	1056.97	1056.97	2	-1.3726	Q9H582	ZN644_HUMAN	Zinc finger protein 644	1193	1199	IHNQTAR	I1dEN3GlcNAc	1195	N2H5F0S0	01Y41Y41M(31M)61M(31M)61M	Mannose	75.37	1	N,0;	19	BI1,BII1,BIII1,iI3-4-B/Y,C/Z,iII3-4-B/Y,C/Z,iIII3-3-B/Y,C/Z,iI2-3-B/Y,C/Z,YI1,YI2,iI3III3Y,iII3III3Y,YI3,iI2-4-B/Y,C/Z,iII2-4-B/Y,C/Z,iIII2-3-B/Y,C/Z,iI4II4Y,iI4III3Y,iII4III3Y,YI4,YII4,YIII3,02XI1,BI4,MH,34XI1,ZI1,YI1,YI2,iI3III3Y,iII3III3Y,YI3,
TR3	12466	55.93	1056.47	1056.47	2	2.69151	Q8IYU4	UBQLN_HUMAN	Ubiquilin-like protein	25	32	NISSSATR	N1GlcNAc@dE	25	N2H5F0S0	01Y41Y41M(31M)61M(31M)61M	Mannose	75.17	1	N,0;	20	BI1,BII1,BIII1,iI3-4-B/Y,C/Z,iII3-4-B/Y,C/Z,iIII3-3-B/Y,C/Z,iI2-3-B/Y,C/Z,YI1,YI2,iI3III3Y,iII3III3Y,YI3,iI2-4-B/Y,C/Z,iII2-4-B/Y,C/Z,iIII2-3-B/Y,C/Z,iI4II4Y,iI4III3Y,iII4III3Y,YI4,YII4,YIII3,02XI1,BI4,MH,34XI1,ZI1,YI1,YI2,iI3III3Y,iII3III3Y,YI3,iI4II4Y,i
TR3	12945	58.15	1097.98	1097.99	2	-2.32496	P39905	GDNF_HUMAN	Glial cell line-derived neurotrophic factor	162	167	NLSRNR	N1GlcNAc@dE	162	N2H6F0S0	01Y41Y41M(31M)61M(31M21M)61M	Mannose	112.2	1	N,0;	1	iI2-3-B/Y,C/Z,
TR3	12945	58.15	1097.98	1097.99	2	-2.32496	Q15842	KCNJ8_HUMAN	ATP-sensitive inward rectifier potassium channel 8	395	400	NNSIRR	N1GlcNAc@dE	395	N2H6F0S0	01Y41Y41M(31M)61M(31M21M)61M	Mannose	112.2	1	N,0;	1	iI2-3-B/Y,C/Z,
TR3	12945	58.15	1097.98	1097.99	2	-2.32496	O00533	NCHL1_HUMAN	Neural cell adhesion molecule L1-like protein	624	629	QNRSVR	Q1dEN2GlcNAc	625	N2H6F0S0	01Y41Y41M(31M)61M(31M21M)61M	Mannose	112.2	1	N,0;	1	iI2-3-B/Y,C/Z,
TR3	12945	58.15	1097.98	1097.99	2	-2.32496	Q15842	KCNJ8_HUMAN	ATP-sensitive inward rectifier potassium channel 8	394	399	RNNSIR	R1dEN2GlcNAc	395	N2H6F0S0	01Y41Y41M(31M)61M(31M21M)61M	Mannose	112.2	1	N,0;	1	iI2-3-B/Y,C/Z,
TR3	12945	58.15	1097.98	1097.99	2	-2.32496	P39905	GDNF_HUMAN	Glial cell line-derived neurotrophic factor	162	167	NLSRNR	N1GlcNAc@dE	162	N2H6F0S0	01Y41Y41M(31M21M)61M(31M)61M	Mannose	109.29	1	N,0;	1	iI2-3-B/Y,C/Z,
TR3	12945	58.15	1097.98	1097.99	2	-2.32496	Q15842	KCNJ8_HUMAN	ATP-sensitive inward rectifier potassium channel 8	395	400	NNSIRR	N1GlcNAc@dE	395	N2H6F0S0	01Y41Y41M(31M21M)61M(31M)61M	Mannose	109.29	1	N,0;	1	iI2-3-B/Y,C/Z,
TR3	12945	58.15	1097.98	1097.99	2	-2.32496	O00533	NCHL1_HUMAN	Neural cell adhesion molecule L1-like protein	624	629	QNRSVR	Q1dEN2GlcNAc	625	N2H6F0S0	01Y41Y41M(31M21M)61M(31M)61M	Mannose	109.29	1	N,0;	1	iI2-3-B/Y,C/Z,
TR3	12945	58.15	1097.98	1097.99	2	-2.32496	Q15842	KCNJ8_HUMAN	ATP-sensitive inward rectifier potassium channel 8	394	399	RNNSIR	R1dEN2GlcNAc	395	N2H6F0S0	01Y41Y41M(31M21M)61M(31M)61M	Mannose	109.29	1	N,0;	1	iI2-3-B/Y,C/Z,
TR1	14130	63.57	742.67	742.672	3	-3.10921	Q9BTC0	DIDO1_HUMAN	Death-inducer obliterator 1	785	790	LHNESK	L1dEN3GlcNAcK6dE	787	N2H6F0S0	01Y41Y41M(31M)61M(31M21M)61M	Mannose	39.64	2	N,2;	3	iI2-3-X15/C,iI2-3-X45/C,iI2-3-B/Y,C/Z,
TR2	14233	64.03	1112	1112	2	-2.54129	Q9H2D6	TARA_HUMAN	TRIO and F-actin-binding protein	736	741	NRTIQR	N1GlcNAc@dE	736	N2H6F0S0	01Y41Y41M(31M)61M(31M21M)61M	Mannose	116.47	1	N,0;	1	iI2-3-B/Y,C/Z,
TR2	14233	64.03	1112	1112	2	-2.54129	Q9H2D6	TARA_HUMAN	TRIO and F-actin-binding protein	736	741	NRTIQR	N1GlcNAc@dE	736	N2H6F0S0	01Y41Y41M(31M21M)61M(31M)61M	Mannose	99.76	1	N,0;	1	iI2-3-B/Y,C/Z,
TR1	14871	66.97	961.074	961.073	3	1.44801	Q8TEM1	PO210_HUMAN	Nuclear pore membrane glycoprotein 210	1438	1447	GPTNNTCVVR	G1dEN4GlcNAcC7Cam	1441	N2H8F0S0	01Y41Y41M(31M21M21M31G)61M(31M)61M	Mannose	57.3	1	N,0;	0
TR1	14871	66.97	961.074	961.073	3	1.44801	Q8TEM1	PO210_HUMAN	Nuclear pore membrane glycoprotein 210	1438	1447	GPTNNTCVVR	G1dEN5GlcNAcC7Cam	1442	N2H8F0S0	01Y41Y41M(31M21M21M31G)61M(31M)61M	Mannose	57.3	1	N,0;	0
TR1	14871	66.97	961.074	961.073	3	1.44801	Q8TEM1	PO210_HUMAN	Nuclear pore membrane glycoprotein 210	1438	1447	GPTNNTCVVR	G1dEN4GlcNAcC7Cam	1441	N2H8F0S0	01Y41Y41M(31M21M21M)61M(31M21M)61M	Mannose	52.05	1	N,0;	0
TR1	14871	66.97	961.074	961.073	3	1.44801	Q8TEM1	PO210_HUMAN	Nuclear pore membrane glycoprotein 210	1438	1447	GPTNNTCVVR	G1dEN5GlcNAcC7Cam	1442	N2H8F0S0	01Y41Y41M(31M21M21M)61M(31M21M)61M	Mannose	52.05	1	N,0;	0
TR3	15050	67.37	1054.43	1054.43	3	3.05193	P10696	PPBN_HUMAN	Alkaline phosphatase, germ cell type	137	144	FNQCNTTR	F1dEC4CamN5GlcNAc	141	N4H5F1S1	01Y41Y41M(31M)61M(21Y(31F)41L32S)61Y41L	Complex	49.27	2	N,0;	0
TR3	15050	67.37	1054.43	1054.43	3	3.05193	P10696	PPBN_HUMAN	Alkaline phosphatase, germ cell type	137	144	FNQCNTTR	F1dEC4CamN5GlcNAc	141	N4H5F1S1	01Y41Y41M(31M)61M(21Y41L32S)61Y(31F)41L	Complex	49.27	2	N,0;	0
TR3	15050	67.37	1054.43	1054.43	3	3.05193	P10696	PPBN_HUMAN	Alkaline phosphatase, germ cell type	137	144	FNQCNTTR	F1dEN2GlcNAcC4Cam	138	N4H5F1S1	01Y41Y41M(31M)61M(21Y(31F)41L32S)61Y41L	Complex	49.27	2	N,0;	0
TR3	15050	67.37	1054.43	1054.43	3	3.05193	P10696	PPBN_HUMAN	Alkaline phosphatase, germ cell type	137	144	FNQCNTTR	F1dEN2GlcNAcC4Cam	138	N4H5F1S1	01Y41Y41M(31M)61M(21Y41L32S)61Y(31F)41L	Complex	49.27	2	N,0;	0
TR3	15050	67.37	1054.43	1054.43	3	3.05193	P10696	PPBN_HUMAN	Alkaline phosphatase, germ cell type	137	144	FNQCNTTR	F1dEC4CamN5GlcNAc	141	N4H5F1S1	01Y41Y41M(31M41Y(31F)41L)61M61Y41L32S	Complex	46.31	1	N,0;	0
TR3	15050	67.37	1054.43	1054.43	3	3.05193	P10696	PPBN_HUMAN	Alkaline phosphatase, germ cell type	137	144	FNQCNTTR	F1dEN2GlcNAcC4Cam	138	N4H5F1S1	01Y41Y41M(31M41Y(31F)41L)61M61Y41L32S	Complex	46.31	1	N,0;	0
TR3	15464	69.23	1112	1112	2	2.49019	Q32P28	P3H1_HUMAN	Prolyl 3-hydroxylase 1	465	471	LLNGSQR	L1dEN3GlcNAc	467	N2H6F0S0	01Y41Y41M(31M)61M(31M21M)61M	Mannose	166.24	2	N,2;	1	iI2-3-B/Y,C/Z,
TR3	15464	69.23	1112	1112	2	2.49019	Q32P28	P3H1_HUMAN	Prolyl 3-hydroxylase 1	465	471	LLNGSQR	L1dEN3GlcNAc	467	N2H6F0S0	01Y41Y41M(31M21M)61M(31M)61M	Mannose	166.24	2	N,2;	1	iI2-3-B/Y,C/Z,
TR3	15464	69.23	1112	1112	2	2.49019	O95714	HERC2_HUMAN	E3 ubiquitin-protein ligase HERC2	3741	3747	LNLASNR	L1dEN6GlcNAc	3746	N2H6F0S0	01Y41Y41M(31M)61M(31M21M)61M	Mannose	158.83	2	N,1;	1	iI2-3-B/Y,C/Z,
TR3	15464	69.23	1112	1112	2	2.49019	O95714	HERC2_HUMAN	E3 ubiquitin-protein ligase HERC2	3741	3747	LNLASNR	L1dEN6GlcNAc	3746	N2H6F0S0	01Y41Y41M(31M21M)61M(31M)61M	Mannose	158.83	2	N,1;	1	iI2-3-B/Y,C/Z,
TR3	15473	69.27	742.67	742.672	3	-2.53393	Q9BTC0	DIDO1_HUMAN	Death-inducer obliterator 1	785	790	LHNESK	L1dEN3GlcNAcK6dE	787	N2H6F0S0	01Y41Y41M(31M21M)61M(31M)61M	Mannose	41.28	1	N,2;	1	iI2-3-B/Y,C/Z,
TR1	15482	69.8	919.783	919.781	3	1.51094	Q86WJ1	CHD1L_HUMAN	Chromodomain-helicase-DNA-binding protein 1-like	458	465	IGQNKSVK	I1dEN4GlcNAcK5dEK8dE	461	N2H8F0S0	01Y41Y41M(31M21M21M31G)61M(31M)61M	Mannose	106.89	1	N,1;	0
TR1	15482	69.8	919.783	919.781	3	1.51094	Q01780	EXOSX_HUMAN	Exosome component 10	858	865	IKQSVGNK	I1dEK2dEN7GlcNAcK8dE	864	N2H8F0S0	01Y41Y41M(31M21M21M31G)61M(31M)61M	Mannose	106.89	1	N,1;	0
TR1	15482	69.8	919.783	919.781	3	1.51094	Q86WJ1	CHD1L_HUMAN	Chromodomain-helicase-DNA-binding protein 1-like	458	465	IGQNKSVK	I1dEN4GlcNAcK5dEK8dE	461	N2H8F0S0	01Y41Y41M(31M21M21M)61M(31M21M)61M	Mannose	101.29	1	N,1;	0
TR1	15482	69.8	919.783	919.781	3	1.51094	Q01780	EXOSX_HUMAN	Exosome component 10	858	865	IKQSVGNK	I1dEK2dEN7GlcNAcK8dE	864	N2H8F0S0	01Y41Y41M(31M21M21M)61M(31M21M)61M	Mannose	101.29	1	N,1;	0
TR2	15702	70.78	973.8	973.799	3	1.7047	Q9UBV2	SE1L1_HUMAN	Protein sel-1 homolog 1	193	200	ILNGSNKK	I1dEN3GlcNAcK7dEK8dE	195	N2H9F0S0	01Y41Y41M(31M21M21M)61M(31M21M)61M21M	Mannose	152.03	1	N,1;	0
TR2	15813	71.3	919.783	919.781	3	2.43996	Q9UBV2	SE1L1_HUMAN	Protein sel-1 homolog 1	193	200	ILNGSNKK	I1dEN3GlcNAcK7dEK8dE	195	N2H8F0S0	01Y41Y41M(31M21M)61M(31M21M)61M21M	Mannose	94.5	1	N,1;	0
TR1	16026	72.37	1069.13	1069.14	3	-3.36093	Q8N4F0	BPIB2_HUMAN	BPI fold-containing family B member 2	287	299	SDDNLLNTSALGR	S1dEN7GlcNAc	293	N4H5F1S0	01Y(61F)41Y41M(31M41Y41L)61M61Y41L	Complex	83.08	1	N,1;	0
TR1	16026	72.37	1069.13	1069.14	3	-3.36093	Q8N4F0	BPIB2_HUMAN	BPI fold-containing family B member 2	287	299	SDDNLLNTSALGR	S1dEN7GlcNAc	293	N4H5F1S0	01Y41Y41M(31M41Y(31F)41L)61M61Y41L	Complex	67.05	1	N,1;	0
TR3	16517	74.18	1151.46	1151.46	3	3.15565	P10696	PPBN_HUMAN	Alkaline phosphatase, germ cell type	137	144	FNQCNTTR	F1dEC4CamN5GlcNAc	141	N4H5F1S2	01Y(61F)41Y41M(31M)61M(21Y41L32S)61Y41L32S	Complex	55.47	1	N,0;	0
TR3	16517	74.18	1151.46	1151.46	3	3.15565	P10696	PPBN_HUMAN	Alkaline phosphatase, germ cell type	137	144	FNQCNTTR	F1dEN2GlcNAcC4Cam	138	N4H5F1S2	01Y(61F)41Y41M(31M)61M(21Y41L32S)61Y41L32S	Complex	55.47	1	N,0;	0
TR3	16517	74.18	1151.46	1151.46	3	3.15565	P10696	PPBN_HUMAN	Alkaline phosphatase, germ cell type	137	144	FNQCNTTR	F1dEC4CamN5GlcNAc	141	N4H5F1S2	01Y41Y41M(31M)61M(21Y(31F)41L32S)61Y41L32S	Complex	53.25	1	N,0;	0
TR3	16517	74.18	1151.46	1151.46	3	3.15565	P10696	PPBN_HUMAN	Alkaline phosphatase, germ cell type	137	144	FNQCNTTR	F1dEN2GlcNAcC4Cam	138	N4H5F1S2	01Y41Y41M(31M)61M(21Y(31F)41L32S)61Y41L32S	Complex	53.25	1	N,0;	0
TR2	16472	74.4	1285.54	1285.53	2	5.62879	P07942	LAMB1_HUMAN	Laminin subunit beta-1	675	681	GTNYTVR	G1dEN3GlcNAc	677	N2H8F0S0	01Y41Y41M(31M21M)61M(31M21M)61M21M	Mannose	162.43	1	N,1;	0
TR2	16472	74.4	1285.54	1285.53	2	5.62879	P07942	LAMB1_HUMAN	Laminin subunit beta-1	675	681	GTNYTVR	G1dEN3GlcNAc	677	N2H8F0S0	01Y41Y41M(31M21M21M)61M(31M21M)61M	Mannose	156.33	1	N,1;	0
TR3	16606	74.62	973.801	973.799	3	2.77022	Q9UBV2	SE1L1_HUMAN	Protein sel-1 homolog 1	193	200	ILNGSNKK	I1dEN3GlcNAcK7dEK8dE	195	N2H9F0S0	01Y41Y41M(31M21M21M31G)61M(31M21M)61M	Mannose	140.95	1	N,0;	0
TR3	16664	74.9	919.782	919.781	3	0.714644	Q9UBV2	SE1L1_HUMAN	Protein sel-1 homolog 1	193	200	ILNGSNKK	I1dEN3GlcNAcK7dEK8dE	195	N2H8F0S0	01Y41Y41M(31M21M21M31G)61M(31M)61M	Mannose	131.47	1	N,1;	0
TR3	16664	74.9	919.782	919.781	3	0.714644	Q9UBV2	SE1L1_HUMAN	Protein sel-1 homolog 1	193	200	ILNGSNKK	I1dEN3GlcNAcK7dEK8dE	195	N2H8F0S0	01Y41Y41M(31M21M21M)61M(31M21M)61M	Mannose	128.68	1	N,1;	0
TR2	16878	76.21	1123.48	1123.48	2	1.31933	P07942	LAMB1_HUMAN	Laminin subunit beta-1	675	681	GTNYTVR	G1dEN3GlcNAc	677	N2H6F0S0	01Y41Y41M(31M)61M(31M21M)61M	Mannose	136.15	2	N,0;	1	iI2-3-B/Y,C/Z,
TR2	16878	76.21	1123.48	1123.48	2	1.31933	P07942	LAMB1_HUMAN	Laminin subunit beta-1	675	681	GTNYTVR	G1dEN3GlcNAc	677	N2H6F0S0	01Y41Y41M(31M21M)61M(31M)61M	Mannose	136.15	2	N,0;	1	iI2-3-B/Y,C/Z,
TR2	17092	77.18	1343.57	1343.56	2	5.54698	Q6ZSJ9	SHSA6_HUMAN	Protein shisa-6	57	63	ELNGTAR	E1dEN3GlcNAc	59	N2H9F0S0	01Y41Y41M(31M21M21M)61M(31M21M)61M21M	Mannose	49.94	1	N,0;	0
TR2	17092	77.18	1343.57	1343.56	2	5.54698	Q6ZUT9	DEN5B_HUMAN	DENN domain-containing protein 5B	450	456	GNETIAR	G1dEN2GlcNAc	451	N2H9F0S0	01Y41Y41M(31M21M21M)61M(31M21M)61M21M	Mannose	49.94	1	N,0;	0
TR2	17139	77.39	1262.53	1262.53	2	2.07653	Q6ZSJ9	SHSA6_HUMAN	Protein shisa-6	57	63	ELNGTAR	E1dEN3GlcNAc	59	N2H8F0S0	01Y41Y41M(31M21M)61M(31M21M)61M21M	Mannose	88.14	1	N,1;	1	iI2-3-B/Y,C/Z,
TR2	17139	77.39	1262.53	1262.53	2	2.07653	Q6ZUT9	DEN5B_HUMAN	DENN domain-containing protein 5B	450	456	GNETIAR	G1dEN2GlcNAc	451	N2H8F0S0	01Y41Y41M(31M21M)61M(31M21M)61M21M	Mannose	85.68	1	N,0;	1	iI2-3-B/Y,C/Z,
TR2	17139	77.39	1262.53	1262.53	2	2.07653	Q6ZSJ9	SHSA6_HUMAN	Protein shisa-6	57	63	ELNGTAR	E1dEN3GlcNAc	59	N2H8F0S0	01Y41Y41M(31M21M21M)61M(31M21M)61M	Mannose	69.3	1	N,1;	0
TR2	17139	77.39	1262.53	1262.53	2	2.07653	Q6ZUT9	DEN5B_HUMAN	DENN domain-containing protein 5B	450	456	GNETIAR	G1dEN2GlcNAc	451	N2H8F0S0	01Y41Y41M(31M21M21M)61M(31M21M)61M	Mannose	66.84	1	N,0;	0
TR1	17179	77.61	1150.8	1150.8	3	0.762264	P56199	ITA1_HUMAN	Integrin alpha-1	876	887	DSCESNHNITCK	D1dEC3CamN8GlcNAcC11CamK12dE	883	N2H9F0S0	01Y41Y41M(31M21M21M31G31G)61M(31M)61M	Mannose	65.39	1	N,1;	0
TR1	17179	77.61	1150.8	1150.8	3	0.762264	P56199	ITA1_HUMAN	Integrin alpha-1	876	887	DSCESNHNITCK	D1dEC3CamN8GlcNAcC11CamK12dE	883	N2H9F0S0	01Y41Y41M(31M21M21M31G)61M(31M21M)61M	Mannose	60.13	1	N,1;	0
TR1	17393	78.6	943.403	943.397	3	5.72066	P25116	PAR1_HUMAN	Proteinase-activated receptor 1	296	305	CLSSSAVANR	C1dE@CamN9GlcNAc	304	N2H8F0S0	01Y41Y41M(31M21M21M31G)61M(31M)61M	Mannose	72.99	2	N,2;	0
TR1	17439	78.82	996.752	996.748	3	3.82933	Q5VV52	ZN691_HUMAN	Zinc finger protein 691	123	131	TFNNTSNLR	T1dEN3GlcNAc	125	N2H9F0S0	01Y41Y41M(31M21M21M31G)61M(31M21M)61M	Mannose	136.88	1	N,0;	0
TR1	17439	78.82	996.752	996.748	3	3.82933	Q5VV52	ZN691_HUMAN	Zinc finger protein 691	123	131	TFNNTSNLR	T1dEN4GlcNAc	126	N2H9F0S0	01Y41Y41M(31M21M21M31G)61M(31M21M)61M	Mannose	136.88	1	N,0;	0
TR1	17439	78.82	996.752	996.748	3	3.82933	Q8NBC4	CT203_HUMAN	Uncharacterized protein C20orf203	182	190	QQFLSNSSR	Q1dEN6GlcNAc	187	N2H9F0S0	01Y41Y41M(31M21M21M31G)61M(31M21M)61M	Mannose	134.8	1	N,0;	0
TR1	17439	78.82	996.752	996.748	3	3.82933	Q5VV52	ZN691_HUMAN	Zinc finger protein 691	123	131	TFNNTSNLR	T1dEN3GlcNAc	125	N2H9F0S0	01Y41Y41M(31M21M21M)61M(31M21M)61M21M	Mannose	131.72	1	N,0;	0
TR1	17439	78.82	996.752	996.748	3	3.82933	Q5VV52	ZN691_HUMAN	Zinc finger protein 691	123	131	TFNNTSNLR	T1dEN4GlcNAc	126	N2H9F0S0	01Y41Y41M(31M21M21M)61M(31M21M)61M21M	Mannose	131.72	1	N,0;	0
TR1	17439	78.82	996.752	996.748	3	3.82933	Q8NBC4	CT203_HUMAN	Uncharacterized protein C20orf203	182	190	QQFLSNSSR	Q1dEN6GlcNAc	187	N2H9F0S0	01Y41Y41M(31M21M21M)61M(31M21M)61M21M	Mannose	129.64	1	N,0;	0
TR1	17439	78.82	996.752	996.753	3	-0.99736	Q13402	MYO7A_HUMAN	Unconventional myosin-VIIa	204	212	TIRNDNSSR	T1dEN6GlcNAc	209	N2H9F0S0	01Y41Y41M(31M21M21M)61M(31M21M)61M21M	Mannose	122.49	2	N,0;	0
TR1	17439	78.82	996.752	996.753	3	-0.99736	Q13402	MYO7A_HUMAN	Unconventional myosin-VIIa	204	212	TIRNDNSSR	T1dEN6GlcNAc	209	N2H9F0S0	01Y41Y41M(31M21M21M31G)61M(31M21M)61M	Mannose	122.49	2	N,0;	0
TR1	17439	78.82	996.752	996.753	3	-0.99736	O00159	MYO1C_HUMAN	Unconventional myosin-Ic	189	197	TLRNDNSSR	T1dEN6GlcNAc	194	N2H9F0S0	01Y41Y41M(31M21M21M)61M(31M21M)61M21M	Mannose	122.49	2	N,0;	0
TR1	17439	78.82	996.752	996.753	3	-0.99736	O00159	MYO1C_HUMAN	Unconventional myosin-Ic	189	197	TLRNDNSSR	T1dEN6GlcNAc	194	N2H9F0S0	01Y41Y41M(31M21M21M31G)61M(31M21M)61M	Mannose	122.49	2	N,0;	0
TR1	17439	78.82	996.752	996.753	3	-0.99736	Q502W6	VWA3B_HUMAN	von Willebrand factor A domain-containing protein 3B	794	803	DGLSNASSRR	D1dEN5GlcNAc	798	N2H9F0S0	01Y41Y41M(31M21M21M)61M(31M21M)61M21M	Mannose	118.71	2	N,1;	0
TR1	17439	78.82	996.752	996.753	3	-0.99736	Q502W6	VWA3B_HUMAN	von Willebrand factor A domain-containing protein 3B	794	803	DGLSNASSRR	D1dEN5GlcNAc	798	N2H9F0S0	01Y41Y41M(31M21M21M31G)61M(31M21M)61M	Mannose	118.71	2	N,1;	0
TR1	17439	78.82	996.752	996.753	3	-0.99736	Q13402	MYO7A_HUMAN	Unconventional myosin-VIIa	204	212	TIRNDNSSR	T1dEN6GlcNAc	209	N2H9F0S0	01Y41Y41M(31M21M21M31G31G)61M(31M)61M	Mannose	107.28	1	N,0;	0
TR1	17439	78.82	996.752	996.753	3	-0.99736	O00159	MYO1C_HUMAN	Unconventional myosin-Ic	189	197	TLRNDNSSR	T1dEN6GlcNAc	194	N2H9F0S0	01Y41Y41M(31M21M21M31G31G)61M(31M)61M	Mannose	107.28	1	N,0;	0
TR1	17439	78.82	996.752	996.753	3	-0.99736	Q502W6	VWA3B_HUMAN	von Willebrand factor A domain-containing protein 3B	794	803	DGLSNASSRR	D1dEN5GlcNAc	798	N2H9F0S0	01Y41Y41M(31M21M21M31G31G)61M(31M)61M	Mannose	103.5	1	N,1;	0
TR1	17439	78.82	997.085	997.081	3	4.25927	O14924	RGS12_HUMAN	Regulator of G-protein signaling 12	1123	1132	QNTAVNSSSR	Q1dEN6GlcNAc	1128	N2H9F0S0	01Y41Y41M(31M21M21M31G)61M(31M21M)61M	Mannose	97.75	1	N,0;	0
TR1	17439	78.82	997.085	997.081	3	4.25927	O14924	RGS12_HUMAN	Regulator of G-protein signaling 12	1123	1132	QNTAVNSSSR	Q1dEN6GlcNAc	1128	N2H9F0S0	01Y41Y41M(31M21M21M)61M(31M21M)61M21M	Mannose	92.8	1	N,0;	0
TR1	17441	78.83	950.134	950.132	3	1.46821	P15586	GNS_HUMAN	N-acetylglucosamine-6-sulfatase	356	366	GPGIKPNQTSK	G1dEK5dEN7GlcNAcK11dE	362	N2H7F0S0	01Y41Y41M(31M21M)61M(31M21M)61M	Mannose	230.22	1	N,1;	1	iI2-3-B/Y,C/Z,
TR1	17441	78.83	950.134	950.132	3	1.46821	P15586	GNS_HUMAN	N-acetylglucosamine-6-sulfatase	356	366	GPGIKPNQTSK	G1dEK5dEN7GlcNAcK11dE	362	N2H7F0S0	01Y41Y41M(31M)61M(31M21M)61M21M	Mannose	221.82	1	N,1;	4	iI2-3-X15/C,iI2-3-X35/B,iI2-3-X45/C,iI2-3-B/Y,C/Z,
TR1	17470	78.96	942.733	942.73	3	2.92037	Q5VV52	ZN691_HUMAN	Zinc finger protein 691	123	131	TFNNTSNLR	T1dEN3GlcNAc	125	N2H8F0S0	01Y41Y41M(31M21M)61M(31M21M)61M21M	Mannose	144.72	1	N,0;	1	iI2-3-B/Y,C/Z,
TR1	17470	78.96	942.733	942.73	3	2.92037	Q5VV52	ZN691_HUMAN	Zinc finger protein 691	123	131	TFNNTSNLR	T1dEN4GlcNAc	126	N2H8F0S0	01Y41Y41M(31M21M)61M(31M21M)61M21M	Mannose	144.72	1	N,0;	1	iI2-3-B/Y,C/Z,
TR1	17470	78.96	942.733	942.73	3	2.92037	Q5VV52	ZN691_HUMAN	Zinc finger protein 691	123	131	TFNNTSNLR	T1dEN3GlcNAc	125	N2H8F0S0	01Y41Y41M(31M21M21M)61M(31M21M)61M	Mannose	142.13	1	N,0;	0
TR1	17470	78.96	942.733	942.73	3	2.92037	Q5VV52	ZN691_HUMAN	Zinc finger protein 691	123	131	TFNNTSNLR	T1dEN4GlcNAc	126	N2H8F0S0	01Y41Y41M(31M21M21M)61M(31M21M)61M	Mannose	142.13	1	N,0;	0
TR1	17470	78.96	942.733	942.736	3	-3.62018	Q3MIR4	CC50B_HUMAN	Cell cycle control protein 50B	271	280	QGNYSAGLPR	Q1dEN3GlcNAc	273	N2H8F0S0	01Y41Y41M(31M21M)61M(31M21M)61M21M	Mannose	138.48	1	N,1;	1	iI2-3-B/Y,C/Z,
TR1	17470	78.96	942.733	942.736	3	-3.62018	Q3MIR4	CC50B_HUMAN	Cell cycle control protein 50B	271	280	QGNYSAGLPR	Q1dEN3GlcNAc	273	N2H8F0S0	01Y41Y41M(31M21M21M)61M(31M21M)61M	Mannose	135.91	1	N,1;	0
TR1	17470	78.96	943.402	943.396	3	6.25454	Q9Y264	ANGP4_HUMAN	Angiopoietin-4	336	344	ENGTVNFQR	E1dEN2GlcNAc	337	N2H8F0S0	01Y41Y41M(31M21M)61M(31M21M)61M21M	Mannose	93.44	1	N,2;	1	iI2-3-B/Y,C/Z,
TR1	17470	78.96	943.402	943.396	3	6.25454	Q9Y264	ANGP4_HUMAN	Angiopoietin-4	336	344	ENGTVNFQR	E1dEN2GlcNAc	337	N2H8F0S0	01Y41Y41M(31M21M21M)61M(31M21M)61M	Mannose	91.01	1	N,2;	0
TR1	17470	78.96	944.07	944.074	3	-4.24107	Q9UBS9	SUCO_HUMAN	SUN domain-containing ossification factor	517	525	TEDLTEGNK	T1dEN8GlcNAcK9dE	524	N2H8F0S0	01Y41Y41M(31M21M21M)61M(31M21M)61M	Mannose	44.61	2	N,0;	0
TR1	17470	78.96	944.07	944.074	3	-4.24107	Q9UBS9	SUCO_HUMAN	SUN domain-containing ossification factor	517	525	TEDLTEGNK	T1dEN8GlcNAcK9dE	524	N2H8F0S0	01Y41Y41M(31M21M21M31G)61M(31M)61M	Mannose	44.61	2	N,0;	0
TR1	17470	78.96	944.07	944.074	3	-4.24107	Q9UBS9	SUCO_HUMAN	SUN domain-containing ossification factor	517	525	TEDLTEGNK	T1dEN8GlcNAcK9dE	524	N2H8F0S0	01Y41Y41M(31M21M)61M(31M21M)61M21M	Mannose	40.38	1	N,0;	1	iI2-3-B/Y,C/Z,
TR3	17578	79.14	1123.98	1123.98	2	0.529882	Q9NZR2	LRP1B_HUMAN	Low-density lipoprotein receptor-related protein 1B	2102	2109	AHANGSVR	A1dEN4GlcNAc	2105	N2H6F0S0	01Y41Y41M(31M)61M(31M21M)61M	Mannose	69.85	1	N,0;	1	iI2-3-B/Y,C/Z,
TR3	17578	79.14	1123.98	1123.98	2	0.529882	Q9NZR2	LRP1B_HUMAN	Low-density lipoprotein receptor-related protein 1B	2102	2109	AHANGSVR	A1dEN4GlcNAc	2105	N2H6F0S0	01Y41Y41M(31M21M)61M(31M)61M	Mannose	61.63	1	N,0;	1	iI2-3-B/Y,C/Z,
TR1	17579	79.5	1080.82	1080.82	3	2.81896	P48960	CD97_HUMAN	CD97 antigen	368	380	GDKNVTMGQSSAR	G1dEK3dEN4GlcNAc	371	N4H5F1S0	01Y(61F)41Y41M(31M41Y41L)61M61Y41L	Complex	111.62	1	N,1;	0
TR1	17579	79.5	1080.82	1080.82	3	2.81896	P48960	CD97_HUMAN	CD97 antigen	368	380	GDKNVTMGQSSAR	G1dEK3dEN4GlcNAc	371	N4H5F1S0	01Y41Y41M(31M41Y(31F)41L)61M61Y41L	Complex	93.65	1	N,1;	0
TR2	17631	79.72	950.469	950.472	3	-3.59596	Q9HA82	CERS4_HUMAN	Ceramide synthase 4	77	86	QVKPNATLEK	Q1dEK3dEN5GlcNAcK10dE	81	N2H7F0S0	01Y41Y41M(31M21M)61M(31M21M)61M	Mannose	132.5	1	N,1;	0
TR2	17631	79.72	950.469	950.472	3	-3.59596	Q9HA82	CERS4_HUMAN	Ceramide synthase 4	77	86	QVKPNATLEK	Q1dEK3dEN5GlcNAcK10dE	81	N2H7F0S0	01Y41Y41M(31M)61M(31M21M)61M21M	Mannose	127.1	1	N,1;	4	iI2-3-X15/C,iI2-3-X35/B,iI2-3-X45/C,iI2-3-B/Y,C/Z,
TR1	17627	79.73	878.764	878.767	3	-3.54919	P07602	SAP_HUMAN	Prosaposin	328	336	LIDNNKTEK	L1dEN5GlcNAcK6dEK9dE	332	N2H6F0S0	01Y41Y41M(31M21M)61M(31M)61M	Mannose	119.87	1	N,0;	0
TR1	17627	79.73	878.764	878.767	3	-3.54919	P07602	SAP_HUMAN	Prosaposin	328	336	LIDNNKTEK	L1dEN5GlcNAcK6dEK9dE	332	N2H6F0S0	01Y41Y41M(31M)61M(31M21M)61M	Mannose	114.43	1	N,0;	3	iI2-3-X15/C,iI2-3-X35/B,iI2-3-X45/C,
TR2	17709	80.1	943.402	943.397	3	5.39718	P25116	PAR1_HUMAN	Proteinase-activated receptor 1	296	305	CLSSSAVANR	C1dE@CamN9GlcNAc	304	N2H8F0S0	01Y41Y41M(31M21M)61M(31M21M)61M21M	Mannose	120.47	1	N,2;	1	iI2-3-B/Y,C/Z,
TR2	17709	80.1	943.402	943.397	3	5.39718	P25116	PAR1_HUMAN	Proteinase-activated receptor 1	296	305	CLSSSAVANR	C1dE@CamN9GlcNAc	304	N2H8F0S0	01Y41Y41M(31M21M21M)61M(31M21M)61M	Mannose	113.03	1	N,2;	0
TR2	17709	80.1	943.068	943.069	3	-1.64684	Q9UER7	DAXX_HUMAN	Death domain-associated protein 6	363	371	ENRSLAMSR	E1dEN2GlcNAc	364	N2H8F0S0	01Y41Y41M(31M21M)61M(31M21M)61M21M	Mannose	112.48	1	N,1;	1	iI2-3-B/Y,C/Z,
TR2	17709	80.1	943.068	943.069	3	-1.64684	Q9UER7	DAXX_HUMAN	Death domain-associated protein 6	363	371	ENRSLAMSR	E1dEN2GlcNAc	364	N2H8F0S0	01Y41Y41M(31M21M21M)61M(31M21M)61M	Mannose	110.02	1	N,1;	0
TR2	17709	80.1	942.733	942.73	3	3.30883	Q5VV52	ZN691_HUMAN	Zinc finger protein 691	123	131	TFNNTSNLR	T1dEN3GlcNAc	125	N2H8F0S0	01Y41Y41M(31M21M21M31G)61M(31M)61M	Mannose	99.27	1	N,0;	0
TR2	17709	80.1	942.733	942.73	3	3.30883	Q5VV52	ZN691_HUMAN	Zinc finger protein 691	123	131	TFNNTSNLR	T1dEN4GlcNAc	126	N2H8F0S0	01Y41Y41M(31M21M21M31G)61M(31M)61M	Mannose	99.27	1	N,0;	0
TR2	17711	80.11	950.133	950.132	3	0.9543	P15586	GNS_HUMAN	N-acetylglucosamine-6-sulfatase	356	366	GPGIKPNQTSK	G1dEK5dEN7GlcNAcK11dE	362	N2H7F0S0	01Y41Y41M(31M21M21M)61M(31M)61M	Mannose	204.15	1	N,1;	0
TR2	17713	80.12	996.752	996.748	3	4.01304	Q5VV52	ZN691_HUMAN	Zinc finger protein 691	123	131	TFNNTSNLR	T1dEN3GlcNAc	125	N2H9F0S0	01Y41Y41M(31M21M21M31G31G)61M(31M)61M	Mannose	112.26	1	N,0;	0
TR2	17713	80.12	996.752	996.748	3	4.01304	Q5VV52	ZN691_HUMAN	Zinc finger protein 691	123	131	TFNNTSNLR	T1dEN4GlcNAc	126	N2H9F0S0	01Y41Y41M(31M21M21M31G31G)61M(31M)61M	Mannose	112.26	1	N,0;	0
TR2	17713	80.12	997.084	997.087	3	-2.57302	Q9UER7	DAXX_HUMAN	Death domain-associated protein 6	363	371	ENRSLAMSR	E1dEN2GlcNAc	364	N2H9F0S0	01Y41Y41M(31M21M21M)61M(31M21M)61M21M	Mannose	112.25	1	N,1;	0
TR2	17713	80.12	997.084	997.087	3	-2.57302	Q9UER7	DAXX_HUMAN	Death domain-associated protein 6	363	371	ENRSLAMSR	E1dEN2GlcNAc	364	N2H9F0S0	01Y41Y41M(31M21M21M31G)61M(31M21M)61M	Mannose	109.73	1	N,1;	0
TR1	17793	80.51	1193.11	1193.11	3	3.16324	P05556	ITB1_HUMAN	Integrin beta-1	477	490	CHEGNGTFECGACR	C1dE@CamN5GlcNAcC10CamC13Cam	481	N2H9F0S0	01Y41Y41M(31M21M21M)61M(31M21M)61M21M	Mannose	61.67	1	N,0;	0
TR3	17942	80.87	1099.97	1099.98	2	-2.09594	Q6ZUT9	DEN5B_HUMAN	DENN domain-containing protein 5B	450	456	GNETIAR	G1dEN2GlcNAc	451	N2H6F0S0	01Y41Y41M(31M)61M(31M21M)61M	Mannose	40.14	1	N,1;	1	iI2-3-B/Y,C/Z,
TR3	17942	80.87	1099.97	1099.98	2	-2.09594	Q6ZSJ9	SHSA6_HUMAN	Protein shisa-6	57	63	ELNGTAR	E1dEN3GlcNAc	59	N2H6F0S0	01Y41Y41M(31M)61M(31M21M)61M	Mannose	37.73	1	N,1;	1	iI2-3-B/Y,C/Z,
TR3	17942	80.87	1099.97	1099.98	2	-2.09594	A1L4H1	SRCRL_HUMAN	Soluble scavenger receptor cysteine-rich domain-containing protein SSC5D	375	381	GNETALR	G1dEN2GlcNAc	376	N2H6F0S0	01Y41Y41M(31M)61M(31M21M)61M	Mannose	37.73	1	N,1;	1	iI2-3-B/Y,C/Z,
TR3	17942	80.87	1099.97	1099.98	2	-2.09594	Q6ZUT9	DEN5B_HUMAN	DENN domain-containing protein 5B	450	456	GNETIAR	G1dEN2GlcNAc	451	N2H6F0S0	01Y41Y41M(31M21M)61M(31M)61M	Mannose	37.67	1	N,1;	1	iI2-3-B/Y,C/Z,
TR3	17942	80.87	1099.97	1099.98	2	-2.09594	Q6ZSJ9	SHSA6_HUMAN	Protein shisa-6	57	63	ELNGTAR	E1dEN3GlcNAc	59	N2H6F0S0	01Y41Y41M(31M21M)61M(31M)61M	Mannose	35.26	1	N,1;	1	iI2-3-B/Y,C/Z,
TR3	17942	80.87	1099.97	1099.98	2	-2.09594	A1L4H1	SRCRL_HUMAN	Soluble scavenger receptor cysteine-rich domain-containing protein SSC5D	375	381	GNETALR	G1dEN2GlcNAc	376	N2H6F0S0	01Y41Y41M(31M21M)61M(31M)61M	Mannose	35.26	1	N,1;	1	iI2-3-B/Y,C/Z,
TR3	17973	81.02	1096.78	1096.78	3	3.39239	P56199	ITA1_HUMAN	Integrin alpha-1	876	887	DSCESNHNITCK	D1dEC3CamN8GlcNAcC11CamK12dE	883	N2H8F0S0	01Y41Y41M(31M21M21M31G)61M(31M)61M	Mannose	87.88	1	N,1;	0
TR3	17973	81.02	1096.78	1096.78	3	3.39239	P56199	ITA1_HUMAN	Integrin alpha-1	876	887	DSCESNHNITCK	D1dEC3CamN8GlcNAcC11CamK12dE	883	N2H8F0S0	01Y41Y41M(31M21M21M)61M(31M21M)61M	Mannose	77.56	1	N,1;	0
TR1	17981	81.44	874.421	874.418	3	4.26072	O94901	SUN1_HUMAN	SUN domain-containing protein 1	588	597	NVTHHVSVTK	N1GlcNAc@dEK10dE	588	N2H6F0S0	01Y41Y41M(31M)61M(31M21M)61M	Mannose	60.58	1	N,0;	4	iI2-3-X15/C,iI2-3-X35/B,iI2-3-X45/C,iI2-3-B/Y,C/Z,
TR1	17981	81.44	874.421	874.418	3	4.26072	O94901	SUN1_HUMAN	SUN domain-containing protein 1	588	597	NVTHHVSVTK	N1GlcNAc@dEK10dE	588	N2H6F0S0	01Y41Y41M(31M21M)61M(31M)61M	Mannose	53.58	1	N,0;	0
TR3	18096	81.62	997.085	997.087	3	-1.89967	Q9UER7	DAXX_HUMAN	Death domain-associated protein 6	363	371	ENRSLAMSR	E1dEN2GlcNAc	364	N2H9F0S0	01Y41Y41M(31M21M21M31G31G)61M(31M)61M	Mannose	90.77	2	N,1;	0
TR2	18044	81.76	1384.09	1384.09	2	0.416384	Q86WI3	NLRC5_HUMAN	Protein NLRC5	1752	1758	IDNQTAK	I1dEN3GlcNAcK7dE	1754	N2H9F0S0	01Y41Y41M(31M21M21M)61M(31M21M)61M21M	Mannose	106.27	1	N,1;	0
TR2	18044	81.76	1384.09	1384.09	2	0.416384	Q86WI3	NLRC5_HUMAN	Protein NLRC5	1752	1758	IDNQTAK	I1dEN3GlcNAcK7dE	1754	N2H9F0S0	01Y41Y41M(31M21M21M31G)61M(31M21M)61M	Mannose	98.4	1	N,1;	0
TR1	18045	81.76	765.404	765.4	3	4.91734	P07602	SAP_HUMAN	Prosaposin	328	336	LIDNNKTEK	L1dEN5GlcNAcK6dEK9dE	332	N2H3F1S0	01Y(61F)41Y41M(31M)61M	Hybrid	58.22	1	N,1;	18	03AI2,iI2-3-X15/C,iI2-3-X35/B,BI1,BII1,BI2,iI2-3-X45/C,iI2-3-A03/Z,iII2-3-A03/Z,iI2-3-A03/Y,iII2-3-A03/Y,iI2-3-A34/Z,iII2-3-A34/Z,iI2-3-B/Y,C/Z,iII2-3-B/Y,C/Z,YI2,iI3II3Y,02XI1,YI3,YII3,YI1,YI2,iI3II3Y,YI3,YII3,
TR3	18130	81.78	950.469	950.472	3	-3.91704	Q9HA82	CERS4_HUMAN	Ceramide synthase 4	77	86	QVKPNATLEK	Q1dEK3dEN5GlcNAcK10dE	81	N2H7F0S0	01Y41Y41M(31M21M21M)61M(31M)61M	Mannose	109.7	1	N,1;	0
TR2	18060	81.84	1138.77	1138.76	3	5.18001	P05556	ITB1_HUMAN	Integrin beta-1	477	490	CHEGNGTFECGACR	C1dE@CamN5GlcNAcC10CamC13Cam	481	N2H8F0S0	01Y41Y41M(31M21M21M31G)61M(31M)61M	Mannose	72.59	1	N,0;	0
TR2	18060	81.84	1138.77	1138.76	3	5.18001	P05556	ITB1_HUMAN	Integrin beta-1	477	490	CHEGNGTFECGACR	C1dE@CamN5GlcNAcC10CamC13Cam	481	N2H8F0S0	01Y41Y41M(31M21M21M)61M(31M21M)61M	Mannose	62.63	1	N,0;	0
TR3	18152	81.89	896.117	896.115	3	2.5503	P15586	GNS_HUMAN	N-acetylglucosamine-6-sulfatase	356	366	GPGIKPNQTSK	G1dEK5dEN7GlcNAcK11dE	362	N2H6F0S0	01Y41Y41M(31M21M)61M(31M)61M	Mannose	94.99	1	N,1;	0
TR3	18152	81.89	896.117	896.115	3	2.5503	P15586	GNS_HUMAN	N-acetylglucosamine-6-sulfatase	356	366	GPGIKPNQTSK	G1dEK5dEN7GlcNAcK11dE	362	N2H6F0S0	01Y41Y41M(31M)61M(31M21M)61M	Mannose	89.76	1	N,1;	3	iI2-3-X15/C,iI2-3-X35/B,iI2-3-X45/C,
TR3	18173	82	942.733	942.735	3	-1.59914	Q13402	MYO7A_HUMAN	Unconventional myosin-VIIa	204	212	TIRNDNSSR	T1dEN6GlcNAc	209	N2H8F0S0	01Y41Y41M(31M21M)61M(31M21M)61M21M	Mannose	116.52	1	N,0;	1	iI2-3-B/Y,C/Z,
TR3	18173	82	942.733	942.735	3	-1.59914	O00159	MYO1C_HUMAN	Unconventional myosin-Ic	189	197	TLRNDNSSR	T1dEN6GlcNAc	194	N2H8F0S0	01Y41Y41M(31M21M)61M(31M21M)61M21M	Mannose	116.52	1	N,0;	1	iI2-3-B/Y,C/Z,
TR3	18173	82	942.733	942.735	3	-1.59914	Q13402	MYO7A_HUMAN	Unconventional myosin-VIIa	204	212	TIRNDNSSR	T1dEN6GlcNAc	209	N2H8F0S0	01Y41Y41M(31M21M21M)61M(31M21M)61M	Mannose	111.55	1	N,0;	0
TR3	18173	82	942.733	942.735	3	-1.59914	O00159	MYO1C_HUMAN	Unconventional myosin-Ic	189	197	TLRNDNSSR	T1dEN6GlcNAc	194	N2H8F0S0	01Y41Y41M(31M21M21M)61M(31M21M)61M	Mannose	111.55	1	N,0;	0
TR2	18119	82.13	1303.07	1303.06	2	4.04109	Q86WI3	NLRC5_HUMAN	Protein NLRC5	1752	1758	IDNQTAK	I1dEN3GlcNAcK7dE	1754	N2H8F0S0	01Y41Y41M(31M21M21M)61M(31M21M)61M	Mannose	128.06	1	N,1;	0
TR1	18119	82.13	982.08	982.078	3	1.1413	P11117	PPAL_HUMAN	Lysosomal acid phosphatase	162	170	YEQLQNETR	Y1dEN6GlcNAc	167	N2H8F0S0	01Y41Y41M(31M21M21M31G)61M(31M)61M	Mannose	61.82	1	N,1;	0
TR1	18127	82.17	1472.62	1472.61	2	7.16739	Q96PU5	NED4L_HUMAN	E3 ubiquitin-protein ligase NEDD4-like	209	217	TYYVNHNNR	T1dEN8GlcNAc	216	N2H8F0S0	01Y41Y41M(31M21M21M)61M(31M21M)61M	Mannose	116.86	1	N,0;	0
TR1	18127	82.17	1472.62	1472.61	2	7.16739	Q96PU5	NED4L_HUMAN	E3 ubiquitin-protein ligase NEDD4-like	209	217	TYYVNHNNR	T1dEN8GlcNAc	216	N2H8F0S0	01Y41Y41M(31M21M)61M(31M21M)61M21M	Mannose	111.4	1	N,0;	1	iI2-3-B/Y,C/Z,
TR3	18233	82.29	888.715	888.712	3	2.99976	Q5VV52	ZN691_HUMAN	Zinc finger protein 691	123	131	TFNNTSNLR	T1dEN3GlcNAc	125	N2H7F0S0	01Y41Y41M(31M21M)61M(31M21M)61M	Mannose	66.54	1	N,0;	1	iI2-3-B/Y,C/Z,
TR3	18233	82.29	888.715	888.712	3	2.99976	Q5VV52	ZN691_HUMAN	Zinc finger protein 691	123	131	TFNNTSNLR	T1dEN4GlcNAc	126	N2H7F0S0	01Y41Y41M(31M21M)61M(31M21M)61M	Mannose	66.54	1	N,0;	1	iI2-3-B/Y,C/Z,
TR3	18233	82.29	888.715	888.712	3	2.99976	Q5VV52	ZN691_HUMAN	Zinc finger protein 691	123	131	TFNNTSNLR	T1dEN3GlcNAc	125	N2H7F0S0	01Y41Y41M(31M21M21M)61M(31M)61M	Mannose	64.14	1	N,0;	0
TR3	18233	82.29	888.715	888.712	3	2.99976	Q5VV52	ZN691_HUMAN	Zinc finger protein 691	123	131	TFNNTSNLR	T1dEN4GlcNAc	126	N2H7F0S0	01Y41Y41M(31M21M21M)61M(31M)61M	Mannose	64.14	1	N,0;	0
TR1	18274	82.88	952.411	952.416	3	-5.16844	O60336	MABP1_HUMAN	Mitogen-activated protein kinase-binding protein 1	82	90	QHHILNSSR	Q1dEN6GlcNAc	87	N2H8F0S0	01Y41Y41M(31M21M)61M(31M21M)61M21M	Mannose	99.36	1	N,1;	1	iI2-3-B/Y,C/Z,
TR1	18274	82.88	952.411	952.416	3	-5.16844	O60336	MABP1_HUMAN	Mitogen-activated protein kinase-binding protein 1	82	90	QHHILNSSR	Q1dEN6GlcNAc	87	N2H8F0S0	01Y41Y41M(31M21M21M)61M(31M21M)61M	Mannose	96.93	1	N,1;	0
TR1	18274	82.88	952.411	952.415	3	-4.72536	P31271	HXA13_HUMAN	Homeobox protein Hox-A13	355	364	ISATTNLSER	I1dEN6GlcNAc	360	N2H8F0S0	01Y41Y41M(31M21M)61M(31M21M)61M21M	Mannose	96.2	2	N,2;	1	iI2-3-B/Y,C/Z,
TR1	18274	82.88	952.411	952.415	3	-4.72536	P31271	HXA13_HUMAN	Homeobox protein Hox-A13	355	364	ISATTNLSER	I1dEN6GlcNAc	360	N2H8F0S0	01Y41Y41M(31M21M21M)61M(31M21M)61M	Mannose	96.2	2	N,2;	0
TR1	18274	82.88	952.411	952.415	3	-4.72536	P31271	HXA13_HUMAN	Homeobox protein Hox-A13	355	364	ISATTNLSER	I1dEN6GlcNAc	360	N2H8F0S0	01Y41Y41M(31M21M21M31G)61M(31M)61M	Mannose	91.35	1	N,2;	0
TR1	18274	82.88	953.079	953.077	3	2.04772	P46939	UTRO_HUMAN	Utrophin	921	929	DVLNDSENK	D1dEN4GlcNAcK9dE	924	N2H8F0S0	01Y41Y41M(31M21M)61M(31M21M)61M21M	Mannose	88.57	1	N,1;	1	iI2-3-B/Y,C/Z,
TR1	18274	82.88	953.079	953.077	3	2.04772	P46939	UTRO_HUMAN	Utrophin	921	929	DVLNDSENK	D1dEN4GlcNAcK9dE	924	N2H8F0S0	01Y41Y41M(31M21M21M)61M(31M21M)61M	Mannose	86.2	1	N,1;	0
TR1	18307	83.04	1210.49	1210.48	2	1.18552	Q9Y639	NPTN_HUMAN	Neuroplastin	197	204	NASNMEYR	N1GlcNAc@dE	197	N2H6F0S0	01Y41Y41M(31M21M)61M(31M)61M	Mannose	91.21	1	N,0;	1	iI2-3-B/Y,C/Z,
TR1	18307	83.04	1210.49	1210.48	2	1.18552	Q9Y639	NPTN_HUMAN	Neuroplastin	197	204	NASNMEYR	N1GlcNAc@dE	197	N2H6F0S0	01Y41Y41M(31M)61M(31M21M)61M	Mannose	83.24	1	N,0;	1	iI2-3-B/Y,C/Z,
TR1	18362	83.31	952.747	952.74	3	7.73704	O95150	TNF15_HUMAN	Tumor necrosis factor ligand superfamily member 15	130	137	NRMNYTNK	N1dEN4GlcNAcK8dE	133	N2H8F0S0	01Y41Y41M(31M21M)61M(31M21M)61M21M	Mannose	115.17	1	N,0;	1	iI2-3-B/Y,C/Z,
TR1	18362	83.31	952.747	952.736	3	11.6553	O00141	SGK1_HUMAN	Serine/threonine-protein kinase Sgk1	42	50	IANNSYACK	I1dEN3GlcNAcC8CamK9dE	44	N2H8F0S0	01Y41Y41M(31M21M)61M(31M21M)61M21M	Mannose	113.58	1	N,1;	1	iI2-3-B/Y,C/Z,
TR1	18362	83.31	952.747	952.74	3	7.73704	O95150	TNF15_HUMAN	Tumor necrosis factor ligand superfamily member 15	130	137	NRMNYTNK	N1dEN4GlcNAcK8dE	133	N2H8F0S0	01Y41Y41M(31M21M21M)61M(31M21M)61M	Mannose	105.63	1	N,0;	0
TR1	18362	83.31	952.747	952.736	3	11.6553	O00141	SGK1_HUMAN	Serine/threonine-protein kinase Sgk1	42	50	IANNSYACK	I1dEN3GlcNAcC8CamK9dE	44	N2H8F0S0	01Y41Y41M(31M21M21M)61M(31M21M)61M	Mannose	101.64	1	N,1;	0
TR3	18451	83.34	1193.12	1193.11	3	3.87943	P05556	ITB1_HUMAN	Integrin beta-1	477	490	CHEGNGTFECGACR	C1dE@CamN5GlcNAcC10CamC13Cam	481	N2H9F0S0	01Y41Y41M(31M21M21M31G)61M(31M21M)61M	Mannose	73.53	1	N,0;	0
TR3	18451	83.34	1193.12	1193.11	3	3.87943	P05556	ITB1_HUMAN	Integrin beta-1	477	490	CHEGNGTFECGACR	C1dE@CamN5GlcNAcC10CamC13Cam	481	N2H9F0S0	01Y41Y41M(31M21M21M31G31G)61M(31M)61M	Mannose	68.64	1	N,0;	0
TR1	18389	83.45	1572.64	1572.64	2	0.21497	O94818	NOL4_HUMAN	Nucleolar protein 4	397	407	VNETDGVEAER	V1dEN2GlcNAc	398	N2H9F0S0	01Y41Y41M(31M21M21M)61M(31M21M)61M21M	Mannose	140.41	2	N,0;	0
TR1	18389	83.45	1572.64	1572.64	2	0.21497	O94818	NOL4_HUMAN	Nucleolar protein 4	397	407	VNETDGVEAER	V1dEN2GlcNAc	398	N2H9F0S0	01Y41Y41M(31M21M21M31G)61M(31M21M)61M	Mannose	140.41	2	N,0;	0
TR1	18389	83.45	1572.64	1572.64	2	0.21497	O94818	NOL4_HUMAN	Nucleolar protein 4	397	407	VNETDGVEAER	V1dEN2GlcNAc	398	N2H9F0S0	01Y41Y41M(31M21M21M31G31G)61M(31M)61M	Mannose	132.49	1	N,0;	0
TR1	18397	83.49	1492.11	1492.13	2	-14.1509	Q08380	LG3BP_HUMAN	Galectin-3-binding protein	118	128	DAGVVCTNETR	D1dEC6CamN8GlcNAc	125	N6H3F0S0	01Y41Y41M(31M41Y)(41Y)61M(21Y)61Y	Complex	48.72	1	N,4;	2	BIII2,CIII2,
TR1	18397	83.49	1492.11	1492.13	2	-14.1509	Q08380	LG3BP_HUMAN	Galectin-3-binding protein	118	128	DAGVVCTNETR	D1dEC6CamN8GlcNAc	125	N6H3F0S0	01Y41Y41M(31M(21Y)41Y)61M(21Y)61Y	Complex	42.01	1	N,4;	2	iI3III3Y,iI3IV3Y,iII3III3Y,iII3IV3Y,iI3III3Y,iI3IV3Y,iII3III3Y,iII3IV3Y,
TR3	18482	83.5	1303.07	1303.06	2	8.66442	Q9UMF0	ICAM5_HUMAN	Intercellular adhesion molecule 5	397	403	NRSAELR	N1GlcNAc@dE	397	N2H8F0S0	01Y41Y41M(31M21M)61M(31M21M)61M21M	Mannose	145.96	1	N,0;	1	iI2-3-B/Y,C/Z,
TR3	18482	83.5	1303.07	1303.06	2	3.29165	Q86WI3	NLRC5_HUMAN	Protein NLRC5	1752	1758	IDNQTAK	I1dEN3GlcNAcK7dE	1754	N2H8F0S0	01Y41Y41M(31M21M)61M(31M21M)61M21M	Mannose	137.83	1	N,1;	1	iI2-3-B/Y,C/Z,
TR3	18482	83.5	1303.07	1303.06	2	8.66442	Q9UMF0	ICAM5_HUMAN	Intercellular adhesion molecule 5	397	403	NRSAELR	N1GlcNAc@dE	397	N2H8F0S0	01Y41Y41M(31M21M21M)61M(31M21M)61M	Mannose	132.45	1	N,0;	0
TR3	18482	83.5	1303.07	1303.06	2	3.05682	Q03923	ZNF85_HUMAN	Zinc finger protein 85	434	440	AFNQSSK	A1dEN3GlcNAcK7dE	436	N2H8F0S0	01Y41Y41M(31M21M)61M(31M21M)61M21M	Mannose	131.76	1	N,1;	1	iI2-3-B/Y,C/Z,
TR3	18482	83.5	1303.07	1303.06	2	3.05682	Q03923	ZNF85_HUMAN	Zinc finger protein 85	434	440	AFNQSSK	A1dEN3GlcNAcK7dE	436	N2H8F0S0	01Y41Y41M(31M21M21M)61M(31M21M)61M	Mannose	118.36	1	N,1;	0
TR2	18430	83.66	1472.62	1472.61	2	3.05045	P11117	PPAL_HUMAN	Lysosomal acid phosphatase	162	170	YEQLQNETR	Y1dEN6GlcNAc	167	N2H8F0S0	01Y41Y41M(31M21M)61M(31M21M)61M21M	Mannose	152.7	1	N,1;	1	iI2-3-B/Y,C/Z,
TR2	18430	83.66	1472.62	1472.61	2	3.05045	P11117	PPAL_HUMAN	Lysosomal acid phosphatase	162	170	YEQLQNETR	Y1dEN6GlcNAc	167	N2H8F0S0	01Y41Y41M(31M21M21M)61M(31M21M)61M	Mannose	147.09	1	N,1;	0
TR1	18517	84.09	830.038	830.038	3	0.867482	Q13214	SEM3B_HUMAN	Semaphorin-3B	119	125	LLHAYNR	L1dEN6GlcNAc	124	N2H7F0S0	01Y41Y41M(31M21M21M)61M(31M)61M	Mannose	63.37	2	N,2;	0
TR1	18550	84.26	1244.56	1244.55	2	4.67199	Q13214	SEM3B_HUMAN	Semaphorin-3B	119	125	LLHAYNR	L1dEN6GlcNAc	124	N2H7F0S0	01Y41Y41M(31M)61M(31M21M)61M21M	Mannose	103.07	1	N,1;	1	iI2-3-B/Y,C/Z,
TR2	18613	84.56	952.747	952.746	3	1.23338	P49589	SYCC_HUMAN	Cysteine--tRNA ligase, cytoplasmic	140	148	LNETTDPDK	L1dEN2GlcNAcK9dE	141	N2H8F0S0	01Y41Y41M(31M21M)61M(31M21M)61M21M	Mannose	104.54	1	N,0;	1	iI2-3-B/Y,C/Z,
TR2	18613	84.56	952.747	952.746	3	1.23338	P49589	SYCC_HUMAN	Cysteine--tRNA ligase, cytoplasmic	140	148	LNETTDPDK	L1dEN2GlcNAcK9dE	141	N2H8F0S0	01Y41Y41M(31M21M21M)61M(31M21M)61M	Mannose	90.37	1	N,0;	0
TR2	18613	84.56	952.747	952.74	3	7.22453	O95150	TNF15_HUMAN	Tumor necrosis factor ligand superfamily member 15	130	137	NRMNYTNK	N1dEN4GlcNAcK8dE	133	N2H8F0S0	01Y41Y41M(31M21M21M31G)61M(31M)61M	Mannose	87.86	1	N,0;	0
TR2	18640	84.7	1572.14	1572.13	2	3.56857	Q08380	LG3BP_HUMAN	Galectin-3-binding protein	118	128	DAGVVCTNETR	D1dEC6CamN8GlcNAc	125	N2H9F0S0	01Y41Y41M(31M21M21M)61M(31M21M)61M21M	Mannose	143.73	2	N,5;	0
TR2	18640	84.7	1572.14	1572.13	2	3.56857	Q08380	LG3BP_HUMAN	Galectin-3-binding protein	118	128	DAGVVCTNETR	D1dEC6CamN8GlcNAc	125	N2H9F0S0	01Y41Y41M(31M21M21M31G31G)61M(31M)61M	Mannose	130.93	1	N,5;	0
TR2	18640	84.7	1572.14	1572.13	2	3.56857	P48307	TFPI2_HUMAN	Tissue factor pathway inhibitor 2	163	173	DEGLCSANVTR	D1dEC5CamN8GlcNAc	170	N2H9F0S0	01Y41Y41M(31M21M21M)61M(31M21M)61M21M	Mannose	116.69	2	N,1;	0
TR2	18640	84.7	1572.14	1572.13	2	3.56857	Q8NHC8	OR2T6_HUMAN	Olfactory receptor 2T6	1	10	MNENNETLTR	M1dEN5GlcNAc	5	N2H9F0S0	01Y41Y41M(31M21M21M)61M(31M21M)61M21M	Mannose	113.09	2	N,0;	0
TR2	18640	84.7	1572.14	1572.13	2	3.56857	Q8NHC8	OR2T6_HUMAN	Olfactory receptor 2T6	1	10	MNENNETLTR	M1dEN5GlcNAc	5	N2H9F0S0	01Y41Y41M(31M21M21M31G)61M(31M21M)61M	Mannose	113.09	2	N,0;	0
TR2	18640	84.7	1572.14	1572.13	2	3.56857	Q8WWQ8	STAB2_HUMAN	Stabilin-2	1272	1281	CDNNDTTIIR	C1dE@CamN4GlcNAc	1275	N2H9F0S0	01Y41Y41M(31M21M21M)61M(31M21M)61M21M	Mannose	109.79	2	N,1;	0
TR2	18640	84.7	1572.14	1572.13	2	3.56857	Q8WWQ8	STAB2_HUMAN	Stabilin-2	1272	1281	CDNNDTTIIR	C1dE@CamN4GlcNAc	1275	N2H9F0S0	01Y41Y41M(31M21M21M31G)61M(31M21M)61M	Mannose	109.79	2	N,1;	0
TR2	18640	84.7	1572.14	1572.13	2	3.56857	P48307	TFPI2_HUMAN	Tissue factor pathway inhibitor 2	163	173	DEGLCSANVTR	D1dEC5CamN8GlcNAc	170	N2H9F0S0	01Y41Y41M(31M21M21M31G31G)61M(31M)61M	Mannose	103.89	1	N,1;	0
TR2	18640	84.7	1572.14	1572.14	2	-2.49134	Q6ZRS4	ITPI1_HUMAN	Protein ITPRID1	589	598	VQSHHNESQR	V1dEN6GlcNAc	594	N2H9F0S0	01Y41Y41M(31M21M21M)61M(31M21M)61M21M	Mannose	102.15	1	N,0;	0
TR2	18640	84.7	1572.14	1572.13	2	3.56857	Q8NHC8	OR2T6_HUMAN	Olfactory receptor 2T6	1	10	MNENNETLTR	M1dEN5GlcNAc	5	N2H9F0S0	01Y41Y41M(31M21M21M31G31G)61M(31M)61M	Mannose	100.29	1	N,0;	0
TR2	18640	84.7	1572.14	1572.14	2	-2.49134	Q6ZRS4	ITPI1_HUMAN	Protein ITPRID1	589	598	VQSHHNESQR	V1dEN6GlcNAc	594	N2H9F0S0	01Y41Y41M(31M21M21M31G)61M(31M21M)61M	Mannose	97.09	1	N,0;	0
TR2	18640	84.7	1572.14	1572.13	2	3.56857	Q8WWQ8	STAB2_HUMAN	Stabilin-2	1272	1281	CDNNDTTIIR	C1dE@CamN4GlcNAc	1275	N2H9F0S0	01Y41Y41M(31M21M21M31G31G)61M(31M)61M	Mannose	96.99	1	N,1;	0
TR2	18642	84.71	1491.11	1491.1	2	5.92641	Q08380	LG3BP_HUMAN	Galectin-3-binding protein	118	128	DAGVVCTNETR	D1dEC6CamN8GlcNAc	125	N2H8F0S0	01Y41Y41M(31M21M)61M(31M21M)61M21M	Mannose	175.73	2	N,4;	1	iI2-3-B/Y,C/Z,
TR2	18642	84.71	1491.11	1491.1	2	5.92641	Q08380	LG3BP_HUMAN	Galectin-3-binding protein	118	128	DAGVVCTNETR	D1dEC6CamN8GlcNAc	125	N2H8F0S0	01Y41Y41M(31M21M21M)61M(31M21M)61M	Mannose	175.73	2	N,4;	0
TR2	18642	84.71	1491.11	1491.1	2	5.92641	Q08380	LG3BP_HUMAN	Galectin-3-binding protein	118	128	DAGVVCTNETR	D1dEC6CamN8GlcNAc	125	N2H8F0S0	01Y41Y41M(31M21M21M31G)61M(31M)61M	Mannose	172.98	1	N,4;	0
TR2	18642	84.71	1491.11	1491.1	2	5.92641	Q8NHC8	OR2T6_HUMAN	Olfactory receptor 2T6	1	10	MNENNETLTR	M1dEN5GlcNAc	5	N2H8F0S0	01Y41Y41M(31M21M)61M(31M21M)61M21M	Mannose	152.15	2	N,0;	1	iI2-3-B/Y,C/Z,
TR2	18642	84.71	1491.11	1491.1	2	5.92641	Q8NHC8	OR2T6_HUMAN	Olfactory receptor 2T6	1	10	MNENNETLTR	M1dEN5GlcNAc	5	N2H8F0S0	01Y41Y41M(31M21M21M)61M(31M21M)61M	Mannose	152.15	2	N,0;	0
TR2	18642	84.71	1491.11	1491.1	2	5.92641	P48307	TFPI2_HUMAN	Tissue factor pathway inhibitor 2	163	173	DEGLCSANVTR	D1dEC5CamN8GlcNAc	170	N2H8F0S0	01Y41Y41M(31M21M)61M(31M21M)61M21M	Mannose	152.02	2	N,1;	1	iI2-3-B/Y,C/Z,
TR2	18642	84.71	1491.11	1491.1	2	5.92641	P48307	TFPI2_HUMAN	Tissue factor pathway inhibitor 2	163	173	DEGLCSANVTR	D1dEC5CamN8GlcNAc	170	N2H8F0S0	01Y41Y41M(31M21M21M)61M(31M21M)61M	Mannose	152.02	2	N,1;	0
TR2	18642	84.71	1491.11	1491.1	2	5.92641	Q8NHC8	OR2T6_HUMAN	Olfactory receptor 2T6	1	10	MNENNETLTR	M1dEN5GlcNAc	5	N2H8F0S0	01Y41Y41M(31M21M21M31G)61M(31M)61M	Mannose	149.4	1	N,0;	0
TR2	18642	84.71	1491.11	1491.1	2	5.92641	P48307	TFPI2_HUMAN	Tissue factor pathway inhibitor 2	163	173	DEGLCSANVTR	D1dEC5CamN8GlcNAc	170	N2H8F0S0	01Y41Y41M(31M21M21M31G)61M(31M)61M	Mannose	149.27	1	N,1;	0
TR2	18642	84.71	1491.11	1491.1	2	5.49921	Q12879	NMDE1_HUMAN	Glutamate receptor ionotropic, NMDA 2A	1207	1215	YRQNSTHCR	Y1dEN4GlcNAcC8Cam	1210	N2H8F0S0	01Y41Y41M(31M21M)61M(31M21M)61M21M	Mannose	148.87	2	N,1;	1	iI2-3-B/Y,C/Z,
TR2	18642	84.71	1491.11	1491.1	2	5.49921	Q12879	NMDE1_HUMAN	Glutamate receptor ionotropic, NMDA 2A	1207	1215	YRQNSTHCR	Y1dEN4GlcNAcC8Cam	1210	N2H8F0S0	01Y41Y41M(31M21M21M)61M(31M21M)61M	Mannose	148.87	2	N,1;	0
TR2	18642	84.71	1491.11	1491.1	2	5.49921	Q12879	NMDE1_HUMAN	Glutamate receptor ionotropic, NMDA 2A	1207	1215	YRQNSTHCR	Y1dEN4GlcNAcC8Cam	1210	N2H8F0S0	01Y41Y41M(31M21M21M31G)61M(31M)61M	Mannose	146.12	1	N,1;	0
TR2	18642	84.71	1491.11	1491.11	2	-0.46281	Q6ZRS4	ITPI1_HUMAN	Protein ITPRID1	589	598	VQSHHNESQR	V1dEN6GlcNAc	594	N2H8F0S0	01Y41Y41M(31M21M)61M(31M21M)61M21M	Mannose	140.33	2	N,0;	1	iI2-3-B/Y,C/Z,
TR2	18642	84.71	1491.11	1491.11	2	-0.46281	Q6ZRS4	ITPI1_HUMAN	Protein ITPRID1	589	598	VQSHHNESQR	V1dEN6GlcNAc	594	N2H8F0S0	01Y41Y41M(31M21M21M)61M(31M21M)61M	Mannose	140.33	2	N,0;	0
TR2	18642	84.71	1491.11	1491.11	2	-0.46281	Q6ZRS4	ITPI1_HUMAN	Protein ITPRID1	589	598	VQSHHNESQR	V1dEN6GlcNAc	594	N2H8F0S0	01Y41Y41M(31M21M21M31G)61M(31M)61M	Mannose	137.61	1	N,0;	0
TR2	18642	84.71	1491.61	1491.61	2	-4.48521	O94818	NOL4_HUMAN	Nucleolar protein 4	397	407	VNETDGVEAER	V1dEN2GlcNAc	398	N2H8F0S0	01Y41Y41M(31M21M)61M(31M21M)61M21M	Mannose	121.28	2	N,0;	1	iI2-3-B/Y,C/Z,
TR2	18642	84.71	1491.61	1491.61	2	-4.48521	O94818	NOL4_HUMAN	Nucleolar protein 4	397	407	VNETDGVEAER	V1dEN2GlcNAc	398	N2H8F0S0	01Y41Y41M(31M21M21M)61M(31M21M)61M	Mannose	121.28	2	N,0;	0
TR2	18642	84.71	1491.61	1491.61	2	-4.48521	O94818	NOL4_HUMAN	Nucleolar protein 4	397	407	VNETDGVEAER	V1dEN2GlcNAc	398	N2H8F0S0	01Y41Y41M(31M21M21M31G)61M(31M)61M	Mannose	118.62	1	N,0;	0
TR2	18663	84.81	1129.15	1129.13	3	14.7617	P08603	CFAH_HUMAN	Complement factor H	907	919	ISEENETTCYMGK	I1dEN5GlcNAcC9CamK13dE	911	N2H8F0S0	01Y41Y41M(31M21M)61M(31M21M)61M21M	Mannose	119.85	1	N,0;	1	iI2-3-B/Y,C/Z,
TR2	18663	84.81	1129.15	1129.13	3	14.7617	P08603	CFAH_HUMAN	Complement factor H	907	919	ISEENETTCYMGK	I1dEN5GlcNAcC9CamK13dE	911	N2H8F0S0	01Y41Y41M(31M21M21M)61M(31M21M)61M	Mannose	99.44	1	N,0;	0
TR3	18828	85.18	952.746	952.747	3	-0.385243	Q96AP7	ESAM_HUMAN	Endothelial cell-selective adhesion molecule	307	317	NGTLSSVTSAR	N1GlcNAc@dE	307	N2H8F0S0	01Y41Y41M(31M21M)61M(31M21M)61M21M	Mannose	92.1	1	N,0;	1	iI2-3-B/Y,C/Z,
TR3	18828	85.18	952.746	952.747	3	-0.385243	Q96AP7	ESAM_HUMAN	Endothelial cell-selective adhesion molecule	307	317	NGTLSSVTSAR	N1GlcNAc@dE	307	N2H8F0S0	01Y41Y41M(31M21M21M)61M(31M21M)61M	Mannose	89.73	1	N,0;	0
TR3	18828	85.18	952.077	952.07	3	7.43377	Q92994	TF3B_HUMAN	Transcription factor IIIB 90 kDa subunit	460	468	YILNESEAR	Y1dEN4GlcNAc	463	N2H8F0S0	01Y41Y41M(31M21M21M31G)61M(31M)61M	Mannose	81.84	1	N,0;	1	iI2-3-X02/B,
TR3	18828	85.18	952.077	952.07	3	7.43377	Q92994	TF3B_HUMAN	Transcription factor IIIB 90 kDa subunit	460	468	YILNESEAR	Y1dEN4GlcNAc	463	N2H8F0S0	01Y41Y41M(31M21M)61M(31M21M)61M21M	Mannose	72.73	2	N,0;	1	iI2-3-B/Y,C/Z,
TR3	18828	85.18	952.077	952.07	3	7.43377	Q92994	TF3B_HUMAN	Transcription factor IIIB 90 kDa subunit	460	468	YILNESEAR	Y1dEN4GlcNAc	463	N2H8F0S0	01Y41Y41M(31M21M21M)61M(31M21M)61M	Mannose	72.73	2	N,0;	0
TR2	18807	85.54	830.038	830.032	3	7.1758	Q6GYQ0	RGPA1_HUMAN	Ral GTPase-activating protein subunit alpha-1	608	615	KNMTLAGR	K1dEN2GlcNAc	609	N2H7F0S0	01Y41Y41M(31M21M)61M(31M21M)61M	Mannose	56.65	1	N,1;	0
TR2	18813	85.57	1244.56	1244.55	2	3.69116	Q13214	SEM3B_HUMAN	Semaphorin-3B	119	125	LLHAYNR	L1dEN6GlcNAc	124	N2H7F0S0	01Y41Y41M(31M21M)61M(31M21M)61M	Mannose	110.01	1	N,0;	0
TR3	18923	85.65	1288.53	1288.52	2	4.37078	Q96T58	MINT_HUMAN	Msx2-interacting protein	1132	1137	NYCSLR	N1GlcNAc@dEC3Cam	1132	N2H8F0S0	01Y41Y41M(31M21M)61M(31M21M)61M21M	Mannose	162.04	1	N,0;	1	iI2-3-B/Y,C/Z,
TR3	18923	85.65	1288.53	1288.52	2	4.37078	Q02809	PLOD1_HUMAN	Procollagen-lysine,2-oxoglutarate 5-dioxygenase 1	685	690	YNCSIR	Y1dEN2GlcNAcC3Cam	686	N2H8F0S0	01Y41Y41M(31M21M)61M(31M21M)61M21M	Mannose	162.04	1	N,0;	1	iI2-3-B/Y,C/Z,
TR3	18923	85.65	1288.53	1288.52	2	4.37078	Q96T58	MINT_HUMAN	Msx2-interacting protein	1132	1137	NYCSLR	N1GlcNAc@dEC3Cam	1132	N2H8F0S0	01Y41Y41M(31M21M21M)61M(31M21M)61M	Mannose	156.28	1	N,0;	0
TR3	18923	85.65	1288.53	1288.52	2	4.37078	Q02809	PLOD1_HUMAN	Procollagen-lysine,2-oxoglutarate 5-dioxygenase 1	685	690	YNCSIR	Y1dEN2GlcNAcC3Cam	686	N2H8F0S0	01Y41Y41M(31M21M21M)61M(31M21M)61M	Mannose	156.28	1	N,0;	0
TR3	18923	85.65	1288.53	1288.52	2	4.37078	P00736	C1R_HUMAN	Complement C1r subcomponent	220	225	CNYSIR	C1dE@CamN2GlcNAc	221	N2H8F0S0	01Y41Y41M(31M21M)61M(31M21M)61M21M	Mannose	154.5	1	N,0;	1	iI2-3-B/Y,C/Z,
TR3	18923	85.65	1288.53	1288.52	2	4.37078	P00736	C1R_HUMAN	Complement C1r subcomponent	220	225	CNYSIR	C1dE@CamN2GlcNAc	221	N2H8F0S0	01Y41Y41M(31M21M21M)61M(31M21M)61M	Mannose	148.74	1	N,0;	0
TR1	18842	85.71	1396.07	1396.06	2	1.82168	P01857	IGHG1_HUMAN	Immunoglobulin heavy constant gamma 1	176	184	EEQYNSTYR	E1dEN5GlcNAc	180	N2H7F0S0	01Y41Y41M(31M21M)61M(31M21M)61M	Mannose	118.3	1	N,0;	1	iI2-3-B/Y,C/Z,
TR1	18842	85.71	1396.07	1396.06	2	1.82168	P01857	IGHG1_HUMAN	Immunoglobulin heavy constant gamma 1	176	184	EEQYNSTYR	E1dEN5GlcNAc	180	N2H7F0S0	01Y41Y41M(31M)61M(31M21M)61M21M	Mannose	110.41	1	N,0;	1	iI2-3-B/Y,C/Z,
TR3	18956	85.81	1572.14	1572.13	2	3.10269	Q08380	LG3BP_HUMAN	Galectin-3-binding protein	118	128	DAGVVCTNETR	D1dEC6CamN8GlcNAc	125	N2H9F0S0	01Y41Y41M(31M21M21M31G)61M(31M21M)61M	Mannose	147.88	1	N,4;	0
TR3	18956	85.81	1572.14	1572.13	2	3.10269	P48307	TFPI2_HUMAN	Tissue factor pathway inhibitor 2	163	173	DEGLCSANVTR	D1dEC5CamN8GlcNAc	170	N2H9F0S0	01Y41Y41M(31M21M21M31G)61M(31M21M)61M	Mannose	121.29	1	N,1;	0
TR1	18870	85.85	1018.11	1018.11	3	0.934258	Q02809	PLOD1_HUMAN	Procollagen-lysine,2-oxoglutarate 5-dioxygenase 1	534	541	YIHQNYTK	Y1dEN5GlcNAcK8dE	538	N2H9F0S0	01Y41Y41M(31M21M21M31G)61M(31M21M)61M	Mannose	163	1	N,4;	0
TR1	18870	85.85	1018.11	1018.11	3	0.934258	Q02809	PLOD1_HUMAN	Procollagen-lysine,2-oxoglutarate 5-dioxygenase 1	534	541	YIHQNYTK	Y1dEN5GlcNAcK8dE	538	N2H9F0S0	01Y41Y41M(31M21M21M)61M(31M21M)61M21M	Mannose	160.48	1	N,4;	0
TR1	18870	85.85	1018.11	1018.11	3	2.26417	Q9NVV4	PAPD1_HUMAN	Poly(A) RNA polymerase, mitochondrial	563	571	GNRTENFTK	G1dEN2GlcNAcK9dE	564	N2H9F0S0	01Y41Y41M(31M21M21M31G)61M(31M21M)61M	Mannose	129.99	1	N,1;	0
TR1	18870	85.85	1018.11	1018.11	3	2.26417	Q9NVV4	PAPD1_HUMAN	Poly(A) RNA polymerase, mitochondrial	563	571	GNRTENFTK	G1dEN6GlcNAcK9dE	568	N2H9F0S0	01Y41Y41M(31M21M21M31G)61M(31M21M)61M	Mannose	129.99	1	N,0;	0
TR1	18870	85.85	1018.11	1018.11	3	2.26417	Q9NVV4	PAPD1_HUMAN	Poly(A) RNA polymerase, mitochondrial	563	571	GNRTENFTK	G1dEN2GlcNAcK9dE	564	N2H9F0S0	01Y41Y41M(31M21M21M)61M(31M21M)61M21M	Mannose	127.47	1	N,1;	0
TR1	18870	85.85	1018.11	1018.11	3	2.26417	Q9NVV4	PAPD1_HUMAN	Poly(A) RNA polymerase, mitochondrial	563	571	GNRTENFTK	G1dEN6GlcNAcK9dE	568	N2H9F0S0	01Y41Y41M(31M21M21M)61M(31M21M)61M21M	Mannose	127.47	1	N,0;	0
TR1	18870	85.85	1018.11	1018.12	3	-5.98242	Q9H967	WDR76_HUMAN	WD repeat-containing protein 76	606	616	YILAGGNSSGK	Y1dEN7GlcNAcK11dE	612	N2H9F0S0	01Y41Y41M(31M21M21M)61M(31M21M)61M21M	Mannose	112.75	1	N,1;	0
TR1	18870	85.85	1018.11	1018.12	3	-5.98242	Q9H967	WDR76_HUMAN	WD repeat-containing protein 76	606	616	YILAGGNSSGK	Y1dEN7GlcNAcK11dE	612	N2H9F0S0	01Y41Y41M(31M21M21M31G)61M(31M21M)61M	Mannose	102.95	1	N,1;	0
TR2	18875	85.89	1163.53	1163.53	2	1.16177	Q13214	SEM3B_HUMAN	Semaphorin-3B	119	125	LLHAYNR	L1dEN6GlcNAc	124	N2H6F0S0	01Y41Y41M(31M21M)61M(31M)61M	Mannose	81.54	1	N,0;	1	iI2-3-B/Y,C/Z,
TR2	18875	85.89	1163.53	1163.53	2	1.16177	Q13214	SEM3B_HUMAN	Semaphorin-3B	119	125	LLHAYNR	L1dEN6GlcNAc	124	N2H6F0S0	01Y41Y41M(31M)61M(31M21M)61M	Mannose	73.31	1	N,0;	1	iI2-3-B/Y,C/Z,
TR1	18920	86.1	924.084	924.091	3	-7.10909	Q16787	LAMA3_HUMAN	Laminin subunit alpha-3	2750	2758	LNDTVGVTK	L1dEN2GlcNAcK9dE	2751	N2H8F0S0	01Y41Y41M(31M21M)61M(31M21M)61M21M	Mannose	38.94	1	N,2;	1	iI2-3-B/Y,C/Z,
TR3	19027	86.17	1192.5	1192.51	2	-0.67712	Q3MIW9	MUCL3_HUMAN	Mucin-like protein 3	85	91	RHCNTTR	R1dEC3CamN4GlcNAc	88	N2H6F0S0	01Y41Y41M(31M21M)61M(31M)61M	Mannose	89.65	1	N,0;	1	iI2-3-B/Y,C/Z,
TR3	19027	86.17	1192.5	1192.51	2	-0.67712	Q3MIW9	MUCL3_HUMAN	Mucin-like protein 3	85	91	RHCNTTR	R1dEC3CamN4GlcNAc	88	N2H6F0S0	01Y41Y41M(31M)61M(31M21M)61M	Mannose	84.2	1	N,0;	2	iI2-3-X35/B,iI2-3-B/Y,C/Z,
TR3	19027	86.17	1192.5	1192.51	2	-6.25526	A6NGG8	PCARE_HUMAN	Photoreceptor cilium actin regulator	657	665	VSPSNTTSR	V1dEN5GlcNAc	661	N2H6F0S0	01Y41Y41M(31M21M)61M(31M)61M	Mannose	79.47	1	N,1;	1	iI2-3-B/Y,C/Z,
TR3	19027	86.17	1192.5	1192.51	2	-6.25526	A6NGG8	PCARE_HUMAN	Photoreceptor cilium actin regulator	657	665	VSPSNTTSR	V1dEN5GlcNAc	661	N2H6F0S0	01Y41Y41M(31M)61M(31M21M)61M	Mannose	74.1	1	N,1;	2	iI2-3-X35/B,iI2-3-B/Y,C/Z,
TR1	18937	86.18	964.096	964.095	3	1.33828	Q02809	PLOD1_HUMAN	Procollagen-lysine,2-oxoglutarate 5-dioxygenase 1	534	541	YIHQNYTK	Y1dEN5GlcNAcK8dE	538	N2H8F0S0	01Y41Y41M(31M21M21M31G)61M(31M)61M	Mannose	200.72	1	N,8;	0
TR1	18937	86.18	964.096	964.095	3	1.33828	Q02809	PLOD1_HUMAN	Procollagen-lysine,2-oxoglutarate 5-dioxygenase 1	534	541	YIHQNYTK	Y1dEN5GlcNAcK8dE	538	N2H8F0S0	01Y41Y41M(31M21M21M)61M(31M21M)61M	Mannose	198.21	1	N,8;	0
TR1	18937	86.18	964.096	964.093	3	2.74375	Q9NVV4	PAPD1_HUMAN	Poly(A) RNA polymerase, mitochondrial	563	571	GNRTENFTK	G1dEN2GlcNAcK9dE	564	N2H8F0S0	01Y41Y41M(31M21M21M31G)61M(31M)61M	Mannose	157.91	1	N,1;	0
TR1	18937	86.18	964.096	964.093	3	2.74375	Q9NVV4	PAPD1_HUMAN	Poly(A) RNA polymerase, mitochondrial	563	571	GNRTENFTK	G1dEN6GlcNAcK9dE	568	N2H8F0S0	01Y41Y41M(31M21M21M31G)61M(31M)61M	Mannose	157.91	1	N,0;	0
TR1	18937	86.18	964.096	964.093	3	2.74375	Q9NVV4	PAPD1_HUMAN	Poly(A) RNA polymerase, mitochondrial	563	571	GNRTENFTK	G1dEN2GlcNAcK9dE	564	N2H8F0S0	01Y41Y41M(31M21M21M)61M(31M21M)61M	Mannose	155.4	1	N,1;	0
TR1	18937	86.18	964.096	964.093	3	2.74375	Q9NVV4	PAPD1_HUMAN	Poly(A) RNA polymerase, mitochondrial	563	571	GNRTENFTK	G1dEN6GlcNAcK9dE	568	N2H8F0S0	01Y41Y41M(31M21M21M)61M(31M21M)61M	Mannose	155.4	1	N,0;	0
TR1	18937	86.18	964.096	964.102	3	-5.96594	Q2NL67	PARP6_HUMAN	Protein mono-ADP-ribosyltransferase PARP6	486	495	NGLVNASYTK	N1dEN5GlcNAcK10dE	490	N2H8F0S0	01Y41Y41M(31M21M21M31G)61M(31M)61M	Mannose	143.09	1	N,0;	0
TR1	18937	86.18	964.096	964.102	3	-5.96594	Q9H967	WDR76_HUMAN	WD repeat-containing protein 76	606	616	YILAGGNSSGK	Y1dEN7GlcNAcK11dE	612	N2H8F0S0	01Y41Y41M(31M21M21M31G)61M(31M)61M	Mannose	139.19	1	N,1;	0
TR1	18937	86.18	964.096	964.102	3	-5.96594	Q2NL67	PARP6_HUMAN	Protein mono-ADP-ribosyltransferase PARP6	486	495	NGLVNASYTK	N1dEN5GlcNAcK10dE	490	N2H8F0S0	01Y41Y41M(31M21M21M)61M(31M21M)61M	Mannose	138.14	1	N,0;	0
TR1	18937	86.18	964.43	964.431	3	-0.989521	P82987	ATL3_HUMAN	ADAMTS-like protein 3	1515	1525	ANGTVQVVSPR	A1dEN2GlcNAc	1516	N2H8F0S0	01Y41Y41M(31M21M21M)61M(31M21M)61M	Mannose	111.16	1	N,2;	0
TR1	18937	86.18	964.43	964.424	3	6.50199	Q99598	TSNAX_HUMAN	Translin-associated protein X	253	261	VENACYALK	V1dEN3GlcNAcC5CamK9dE	255	N2H8F0S0	01Y41Y41M(31M21M21M)61M(31M21M)61M	Mannose	104.68	1	N,0;	0
TR1	18941	86.2	878.389	878.384	3	5.71871	Q9UBF8	PI4KB_HUMAN	Phosphatidylinositol 4-kinase beta	120	126	RQNNSAK	R1dEN3GlcNAcK7dE	122	N2H8F0S0	01Y41Y41M(31M21M)61M(31M21M)61M21M	Mannose	53.93	1	N,2;	2	iI2-3-B/Y,C/Z,iI3-4-X15/C,
TR1	18941	86.2	878.389	878.384	3	5.71871	Q9UBF8	PI4KB_HUMAN	Phosphatidylinositol 4-kinase beta	120	126	RQNNSAK	R1dEN3GlcNAcK7dE	122	N2H8F0S0	01Y41Y41M(31M21M21M)61M(31M21M)61M	Mannose	49.8	1	N,2;	0
TR1	18963	86.31	1317.09	1317.08	2	4.20867	Q86U86	PB1_HUMAN	Protein polybromo-1	237	243	IQNGSYK	I1dEN3GlcNAcK7dE	239	N2H8F0S0	01Y41Y41M(31M21M)61M(31M21M)61M21M	Mannose	134.92	1	N,1;	1	iI2-3-B/Y,C/Z,
TR1	18963	86.31	1317.09	1317.09	2	0.190685	O60303	K0556_HUMAN	Protein KIAA0556	274	280	ERNLSAK	E1dEN3GlcNAcK7dE	276	N2H8F0S0	01Y41Y41M(31M21M21M31G)61M(31M)61M	Mannose	134.25	1	N,1;	0
TR1	18963	86.31	1317.09	1317.09	2	0.190685	Q9UBT2	SAE2_HUMAN	SUMO-activating enzyme subunit 2	618	624	ENLSAKR	E1dEN2GlcNAcK6dE	619	N2H8F0S0	01Y41Y41M(31M21M21M31G)61M(31M)61M	Mannose	132.32	1	N,0;	0
TR1	18963	86.31	1317.09	1317.08	2	4.20867	Q86U86	PB1_HUMAN	Protein polybromo-1	237	243	IQNGSYK	I1dEN3GlcNAcK7dE	239	N2H8F0S0	01Y41Y41M(31M21M21M)61M(31M21M)61M	Mannose	132.32	2	N,1;	0
TR1	18963	86.31	1317.09	1317.08	2	4.20867	Q86U86	PB1_HUMAN	Protein polybromo-1	237	243	IQNGSYK	I1dEN3GlcNAcK7dE	239	N2H8F0S0	01Y41Y41M(31M21M21M31G)61M(31M)61M	Mannose	132.32	2	N,1;	0
TR1	18963	86.31	1317.09	1317.09	2	0.190685	O60303	K0556_HUMAN	Protein KIAA0556	274	280	ERNLSAK	E1dEN3GlcNAcK7dE	276	N2H8F0S0	01Y41Y41M(31M21M21M)61M(31M21M)61M	Mannose	131.65	1	N,1;	0
TR1	18963	86.31	1317.09	1317.09	2	0.190685	Q9UGN5	PARP2_HUMAN	Poly [ADP-ribose] polymerase 2	16	22	ALNESKR	A1dEN3GlcNAcK6dE	18	N2H8F0S0	01Y41Y41M(31M21M21M31G)61M(31M)61M	Mannose	130.58	1	N,1;	0
TR1	18963	86.31	1317.09	1317.09	2	0.190685	Q13813	SPTN1_HUMAN	Spectrin alpha chain, non-erythrocytic 1	1142	1148	ANESRLK	A1dEN2GlcNAcK7dE	1143	N2H8F0S0	01Y41Y41M(31M21M21M31G)61M(31M)61M	Mannose	130.58	1	N,1;	0
TR1	18963	86.31	1317.09	1317.09	2	0.190685	O15031	PLXB2_HUMAN	Plexin-B2	124	131	ALSNISLR	A1dEN4GlcNAc	127	N2H8F0S0	01Y41Y41M(31M21M21M31G)61M(31M)61M	Mannose	130.52	1	N,1;	0
TR1	18963	86.31	1317.09	1317.09	2	0.190685	Q9UBT2	SAE2_HUMAN	SUMO-activating enzyme subunit 2	618	624	ENLSAKR	E1dEN2GlcNAcK6dE	619	N2H8F0S0	01Y41Y41M(31M21M21M)61M(31M21M)61M	Mannose	129.72	1	N,0;	0
TR1	18963	86.31	1317.09	1317.09	2	0.190685	Q9UGN5	PARP2_HUMAN	Poly [ADP-ribose] polymerase 2	16	22	ALNESKR	A1dEN3GlcNAcK6dE	18	N2H8F0S0	01Y41Y41M(31M21M21M)61M(31M21M)61M	Mannose	127.98	1	N,1;	0
TR1	18963	86.31	1317.09	1317.09	2	0.190685	O15031	PLXB2_HUMAN	Plexin-B2	124	131	ALSNISLR	A1dEN4GlcNAc	127	N2H8F0S0	01Y41Y41M(31M21M21M)61M(31M21M)61M	Mannose	127.92	1	N,1;	0
TR1	18962	86.31	932.745	932.74	3	5.65555	Q92886	NGN1_HUMAN	Neurogenin-1	50	57	RGAPNISR	R1dEN5GlcNAc	54	N2H9F0S0	01Y41Y41M(31M21M21M31G)61M(31M21M)61M	Mannose	57.99	1	N,1;	0
TR1	18962	86.31	932.745	932.74	3	5.65555	Q92886	NGN1_HUMAN	Neurogenin-1	50	57	RGAPNISR	R1dEN5GlcNAc	54	N2H9F0S0	01Y41Y41M(31M21M21M31G31G)61M(31M)61M	Mannose	53.67	1	N,1;	0
TR1	18962	86.31	932.407	932.41	3	-3.06768	Q13813	SPTN1_HUMAN	Spectrin alpha chain, non-erythrocytic 1	1142	1148	ANESRLK	A1dEN2GlcNAcK7dE	1143	N2H9F0S0	01Y41Y41M(31M21M21M)61M(31M21M)61M21M	Mannose	49.07	2	N,1;	0
TR1	18962	86.31	932.407	932.41	3	-3.06768	Q13813	SPTN1_HUMAN	Spectrin alpha chain, non-erythrocytic 1	1142	1148	ANESRLK	A1dEN2GlcNAcK7dE	1143	N2H9F0S0	01Y41Y41M(31M21M21M31G)61M(31M21M)61M	Mannose	49.07	2	N,1;	0
TR1	18962	86.31	932.407	932.407	3	0.716069	Q86U86	PB1_HUMAN	Protein polybromo-1	237	243	IQNGSYK	I1dEN3GlcNAcK7dE	239	N2H9F0S0	01Y41Y41M(31M21M21M)61M(31M21M)61M21M	Mannose	43.24	2	N,1;	0
TR1	18962	86.31	932.407	932.407	3	0.716069	Q86U86	PB1_HUMAN	Protein polybromo-1	237	243	IQNGSYK	I1dEN3GlcNAcK7dE	239	N2H9F0S0	01Y41Y41M(31M21M21M31G)61M(31M21M)61M	Mannose	43.24	2	N,1;	0
TR3	19064	86.36	884.055	884.055	3	0.290617	Q13214	SEM3B_HUMAN	Semaphorin-3B	119	125	LLHAYNR	L1dEN6GlcNAc	124	N2H8F0S0	01Y41Y41M(31M21M)61M(31M21M)61M21M	Mannose	66.4	2	N,1;	1	iI3-4-X15/B,
TR3	19064	86.36	884.055	884.055	3	0.290617	Q13214	SEM3B_HUMAN	Semaphorin-3B	119	125	LLHAYNR	L1dEN6GlcNAc	124	N2H8F0S0	01Y41Y41M(31M21M21M)61M(31M21M)61M	Mannose	66.4	2	N,1;	0
TR3	19064	86.36	884.055	884.055	3	0.290617	Q13214	SEM3B_HUMAN	Semaphorin-3B	119	125	LLHAYNR	L1dEN6GlcNAc	124	N2H8F0S0	01Y41Y41M(31M21M21M31G)61M(31M)61M	Mannose	64.1	1	N,1;	0
TR1	18977	86.38	910.079	910.077	3	1.9255	Q02809	PLOD1_HUMAN	Procollagen-lysine,2-oxoglutarate 5-dioxygenase 1	534	541	YIHQNYTK	Y1dEN5GlcNAcK8dE	538	N2H7F0S0	01Y41Y41M(31M)61M(31M21M)61M21M	Mannose	145.02	1	N,4;	4	iI2-3-X15/C,iI2-3-X35/B,iI2-3-X45/C,iI2-3-B/Y,C/Z,
TR1	18977	86.38	910.079	910.077	3	1.9255	Q02809	PLOD1_HUMAN	Procollagen-lysine,2-oxoglutarate 5-dioxygenase 1	534	541	YIHQNYTK	Y1dEN5GlcNAcK8dE	538	N2H7F0S0	01Y41Y41M(31M21M)61M(31M21M)61M	Mannose	140.19	1	N,4;	1	iI2-3-B/Y,C/Z,
TR1	18977	86.38	910.079	910.076	3	3.41549	Q9NVV4	PAPD1_HUMAN	Poly(A) RNA polymerase, mitochondrial	563	571	GNRTENFTK	G1dEN2GlcNAcK9dE	564	N2H7F0S0	01Y41Y41M(31M)61M(31M21M)61M21M	Mannose	107.83	1	N,0;	4	iI2-3-X15/C,iI2-3-X35/B,iI2-3-X45/C,iI2-3-B/Y,C/Z,
TR1	18977	86.38	910.079	910.076	3	3.41549	Q9NVV4	PAPD1_HUMAN	Poly(A) RNA polymerase, mitochondrial	563	571	GNRTENFTK	G1dEN6GlcNAcK9dE	568	N2H7F0S0	01Y41Y41M(31M)61M(31M21M)61M21M	Mannose	107.83	1	N,0;	4	iI2-3-X15/C,iI2-3-X35/B,iI2-3-X45/C,iI2-3-B/Y,C/Z,
TR1	18977	86.38	910.079	910.076	3	3.41549	Q9NVV4	PAPD1_HUMAN	Poly(A) RNA polymerase, mitochondrial	563	571	GNRTENFTK	G1dEN2GlcNAcK9dE	564	N2H7F0S0	01Y41Y41M(31M21M)61M(31M21M)61M	Mannose	103	1	N,0;	1	iI2-3-B/Y,C/Z,
TR1	18977	86.38	910.079	910.076	3	3.41549	Q9NVV4	PAPD1_HUMAN	Poly(A) RNA polymerase, mitochondrial	563	571	GNRTENFTK	G1dEN6GlcNAcK9dE	568	N2H7F0S0	01Y41Y41M(31M21M)61M(31M21M)61M	Mannose	103	1	N,0;	1	iI2-3-B/Y,C/Z,
TR1	18977	86.38	910.079	910.084	3	-5.81226	Q9H967	WDR76_HUMAN	WD repeat-containing protein 76	606	616	YILAGGNSSGK	Y1dEN7GlcNAcK11dE	612	N2H7F0S0	01Y41Y41M(31M21M)61M(31M21M)61M	Mannose	97.09	1	N,1;	1	iI2-3-B/Y,C/Z,
TR1	18977	86.38	910.079	910.084	3	-5.81226	Q9H967	WDR76_HUMAN	WD repeat-containing protein 76	606	616	YILAGGNSSGK	Y1dEN7GlcNAcK11dE	612	N2H7F0S0	01Y41Y41M(31M)61M(31M21M)61M21M	Mannose	92.3	1	N,1;	4	iI2-3-X15/C,iI2-3-X35/B,iI2-3-X45/C,iI2-3-B/Y,C/Z,
TR1	18977	86.38	910.079	910.072	3	7.73934	Q15643	TRIPB_HUMAN	Thyroid receptor-interacting protein 11	918	926	IIEDQNQSK	I1dEN6GlcNAcK9dE	923	N2H7F0S0	01Y41Y41M(31M)61M(31M21M)61M21M	Mannose	73.92	1	N,1;	4	iI2-3-X15/C,iI2-3-X35/B,iI2-3-X45/C,iI2-3-B/Y,C/Z,
TR1	18977	86.38	910.079	910.072	3	7.73934	Q15643	TRIPB_HUMAN	Thyroid receptor-interacting protein 11	918	926	IIEDQNQSK	I1dEN6GlcNAcK9dE	923	N2H7F0S0	01Y41Y41M(31M21M)61M(31M21M)61M	Mannose	69.35	1	N,1;	1	iI2-3-B/Y,C/Z,
TR1	19000	86.5	940.746	940.745	3	1.23489	Q13214	SEM3B_HUMAN	Semaphorin-3B	119	125	LLHAYNR	L1dEN6GlcNAc	124	N3H6F0S1	01Y41Y41M(31M41Y41L32S)61M(31M)61M	Hybrid	62.16	1	N,0;	27	02AIII2,BIII2,BI1,BII1,BI2,iIII2-4-A34/Z,BIII1,iI3-3-X25/B,iIII3-3-B/Y,C/Z,35AIII4,35AIII3,iIII4-6-B/Y,C/Z,YI1,BIII3,YI2,iI3III3Y,iII3III3Y,iI3III4Y,iII3III4Y,iIII2-3-B/Y,C/Z,iI4III3Y,iII4III3Y,iI4III4Y,iII4III4Y,YIII3,02XI1,YIII4,YI1,iI4III6Y,iII4III6Y,Y
TR2	19044	86.73	1116.13	1116.14	3	-14.0623	P08603	CFAH_HUMAN	Complement factor H	907	919	ISEENETTCYMGK	I1dEN5GlcNAcC9CamK13dE	911	N5H4F0S0	01Y41Y41M(31M)61M(21Y41L31Y)61Y	Complex	51.13	1	N,1;	0
TR1	19070	86.85	887.062	887.067	3	-5.9344	Q13214	SEM3B_HUMAN	Semaphorin-3B	119	125	LLHAYNR	L1dEN6GlcNAc	124	N3H5F2S0	01Y41Y41M(31M21Y(31F)41L21F)61M61M	Hybrid	50.51	1	N,0;	3	iII5-6-A35/Z,25AII3,13AII4,
TR2	19070	86.87	1395.56	1395.56	2	0.520534	A0A1B0GVY4	SIM31_HUMAN	Small integral membrane protein 31	57	65	KNCSEEEHR	K1dEN2GlcNAcC3Cam	58	N2H7F0S0	01Y41Y41M(31M21M)61M(31M21M)61M	Mannose	130.79	1	N,0;	1	iI2-3-B/Y,C/Z,
TR2	19070	86.87	1395.56	1395.56	2	-0.938376	P04628	WNT1_HUMAN	Proto-oncogene Wnt-1	295	304	SPNFCTYSGR	S1dEN3GlcNAcC5Cam	297	N2H7F0S0	01Y41Y41M(31M21M)61M(31M21M)61M	Mannose	130.64	1	N,0;	1	iI2-3-B/Y,C/Z,
TR2	19070	86.87	1395.56	1395.56	2	0.520534	A0A1B0GVY4	SIM31_HUMAN	Small integral membrane protein 31	57	65	KNCSEEEHR	K1dEN2GlcNAcC3Cam	58	N2H7F0S0	01Y41Y41M(31M21M21M)61M(31M)61M	Mannose	122.71	1	N,0;	1	iI2-3-B/Y,C/Z,iIII2-3-B/Y,C/Z,
TR2	19070	86.87	1395.56	1395.56	2	-0.938376	P04628	WNT1_HUMAN	Proto-oncogene Wnt-1	295	304	SPNFCTYSGR	S1dEN3GlcNAcC5Cam	297	N2H7F0S0	01Y41Y41M(31M)61M(31M21M)61M21M	Mannose	122.56	2	N,0;	1	iI2-3-B/Y,C/Z,
TR2	19070	86.87	1395.56	1395.56	2	-0.938376	P04628	WNT1_HUMAN	Proto-oncogene Wnt-1	295	304	SPNFCTYSGR	S1dEN3GlcNAcC5Cam	297	N2H7F0S0	01Y41Y41M(31M21M21M)61M(31M)61M	Mannose	122.56	2	N,0;	1	iI2-3-B/Y,C/Z,iIII2-3-B/Y,C/Z,
TR2	19070	86.87	1396.07	1396.06	2	3.04582	P01857	IGHG1_HUMAN	Immunoglobulin heavy constant gamma 1	176	184	EEQYNSTYR	E1dEN5GlcNAc	180	N2H7F0S0	01Y41Y41M(31M21M21M)61M(31M)61M	Mannose	99.75	1	N,0;	1	iI2-3-B/Y,C/Z,iIII2-3-B/Y,C/Z,
TR2	19089	86.96	1385.13	1385.12	2	4.42481	Q9Y4L1	HYOU1_HUMAN	Hypoxia up-regulated protein 1	869	877	NATLAEQAK	N1GlcNAc@dEK9dE	869	N2H8F0S0	01Y41Y41M(31M21M21M31G)61M(31M)61M	Mannose	145.78	1	N,0;	0
TR2	19089	86.96	1385.13	1385.12	2	4.42481	P54289	CA2D1_HUMAN	Voltage-dependent calcium channel subunit alpha-2/delta-1	320	328	DAVNNITAK	D1dEN5GlcNAcK9dE	324	N2H8F0S0	01Y41Y41M(31M21M21M31G)61M(31M)61M	Mannose	111.7	1	N,0;	0
TR2	19096	87	1318.08	1318.08	2	4.78332	Q969V4	TEKT1_HUMAN	Tektin-1	233	239	NNSLMLK	N1GlcNAc@dEK7dE	233	N2H8F0S0	01Y41Y41M(31M21M21M)61M(31M21M)61M	Mannose	117.8	1	N,0;	0
TR2	19096	87	1318.08	1318.08	2	4.78332	Q969V4	TEKT1_HUMAN	Tektin-1	233	239	NNSLMLK	N1GlcNAc@dEK7dE	233	N2H8F0S0	01Y41Y41M(31M21M)61M(31M21M)61M21M	Mannose	115.22	1	N,0;	1	iI2-3-B/Y,C/Z,
TR2	19096	87	1318.08	1318.08	2	0.536989	Q8NAV1	PR38A_HUMAN	Pre-mRNA-splicing factor 38A	1	7	MANRTVK	M1dEN3GlcNAcK7dE	3	N2H8F0S0	01Y41Y41M(31M21M21M)61M(31M21M)61M	Mannose	114.92	1	N,0;	0
TR2	19096	87	1318.08	1318.07	2	7.59501	H0YL09	U2Q2L_HUMAN	Putative ubiquitin-conjugating enzyme E2Q2-like protein	109	115	ENSSVRK	E1dEN2GlcNAcK7dE	110	N2H8F0S0	01Y41Y41M(31M21M21M)61M(31M21M)61M	Mannose	113.03	1	N,0;	0
TR2	19096	87	1318.08	1318.08	2	0.536989	Q8NAV1	PR38A_HUMAN	Pre-mRNA-splicing factor 38A	1	7	MANRTVK	M1dEN3GlcNAcK7dE	3	N2H8F0S0	01Y41Y41M(31M21M21M31G)61M(31M)61M	Mannose	112.36	1	N,0;	0
TR2	19096	87	1318.08	1318.07	2	7.59501	H0YL09	U2Q2L_HUMAN	Putative ubiquitin-conjugating enzyme E2Q2-like protein	109	115	ENSSVRK	E1dEN2GlcNAcK7dE	110	N2H8F0S0	01Y41Y41M(31M21M)61M(31M21M)61M21M	Mannose	110.47	1	N,0;	1	iI2-3-B/Y,C/Z,
TR2	19096	87	1318.08	1318.09	2	-1.96285	Q6KC79	NIPBL_HUMAN	Nipped-B-like protein	921	927	TEGNKSK	T1dEN4GlcNAcK5dEK7dE	924	N2H8F0S0	01Y41Y41M(31M21M21M)61M(31M21M)61M	Mannose	108.38	1	N,0;	0
TR2	19096	87	1318.08	1318.09	2	-1.96285	Q6KC79	NIPBL_HUMAN	Nipped-B-like protein	921	927	TEGNKSK	T1dEN4GlcNAcK5dEK7dE	924	N2H8F0S0	01Y41Y41M(31M21M21M31G)61M(31M)61M	Mannose	105.82	1	N,0;	0
TR2	19150	87.27	1395.56	1395.57	2	-9.05863	Q3MIT2	PUS10_HUMAN	Putative tRNA pseudouridine synthase Pus10	332	342	AESFNFSSSGR	A1dEN5GlcNAc	336	N2H7F0S0	01Y41Y41M(31M21M)61M(31M21M)61M	Mannose	115.31	1	N,0;	2	iI2-3-X01/B,iI2-3-B/Y,C/Z,
TR2	19150	87.27	1395.56	1395.57	2	-9.05863	Q3MIT2	PUS10_HUMAN	Putative tRNA pseudouridine synthase Pus10	332	342	AESFNFSSSGR	A1dEN5GlcNAc	336	N2H7F0S0	01Y41Y41M(31M)61M(31M21M)61M21M	Mannose	109.89	1	N,0;	2	iI2-3-B/Y,C/Z,iI2-3-C/Y,
TR2	19152	87.28	910.076	910.079	3	-3.70899	Q99698	LYST_HUMAN	Lysosomal-trafficking regulator	1634	1643	KTSLSSDSNK	K1dEN9GlcNAcK10dE	1642	N2H7F0S0	01Y41Y41M(31M21M)61M(31M21M)61M	Mannose	62.18	1	N,1;	1	iI2-3-B/Y,C/Z,
TR2	19152	87.28	910.076	910.079	3	-3.70899	O75179	ANR17_HUMAN	Ankyrin repeat domain-containing protein 17	1559	1568	NNTITTTSSK	N1GlcNAc@dEK10dE	1559	N2H7F0S0	01Y41Y41M(31M21M)61M(31M21M)61M	Mannose	58.74	1	N,0;	1	iI2-3-B/Y,C/Z,
TR2	19152	87.28	910.076	910.079	3	-3.70899	O75179	ANR17_HUMAN	Ankyrin repeat domain-containing protein 17	1559	1568	NNTITTTSSK	N1GlcNAc@dEK10dE	1559	N2H7F0S0	01Y41Y41M(31M)61M(31M21M)61M21M	Mannose	56.57	1	N,0;	5	iI2-3-X15/C,iI2-3-X35/B,iI2-3-X45/C,iI2-3-X02/B,iI2-3-B/Y,C/Z,
TR2	19153	87.29	1315.04	1315.04	2	1.23223	P01857	IGHG1_HUMAN	Immunoglobulin heavy constant gamma 1	176	184	EEQYNSTYR	E1dEN5GlcNAc	180	N2H6F0S0	01Y41Y41M(31M)61M(31M21M)61M	Mannose	74.73	1	N,0;	2	iI2-3-X35/B,iI2-3-B/Y,C/Z,
TR2	19153	87.29	1315.04	1315.04	2	1.23223	P01857	IGHG1_HUMAN	Immunoglobulin heavy constant gamma 1	176	184	EEQYNSTYR	E1dEN5GlcNAc	180	N2H6F0S0	01Y41Y41M(31M21M)61M(31M)61M	Mannose	72.22	1	N,0;	1	iI2-3-B/Y,C/Z,
TR2	19164	87.34	964.096	964.102	3	-5.83932	Q2NL67	PARP6_HUMAN	Protein mono-ADP-ribosyltransferase PARP6	486	495	NGLVNASYTK	N1dEN5GlcNAcK10dE	490	N2H8F0S0	01Y41Y41M(31M21M)61M(31M21M)61M21M	Mannose	135.75	2	N,0;	1	iI2-3-B/Y,C/Z,
TR2	19164	87.34	964.43	964.431	3	-0.546517	P82987	ATL3_HUMAN	ADAMTS-like protein 3	1515	1525	ANGTVQVVSPR	A1dEN2GlcNAc	1516	N2H8F0S0	01Y41Y41M(31M21M21M31G)61M(31M)61M	Mannose	112.79	1	N,2;	0
TR2	19164	87.34	964.43	964.424	3	6.945	Q99598	TSNAX_HUMAN	Translin-associated protein X	253	261	VENACYALK	V1dEN3GlcNAcC5CamK9dE	255	N2H8F0S0	01Y41Y41M(31M21M21M31G)61M(31M)61M	Mannose	106.72	1	N,0;	0
TR2	19164	87.34	964.43	964.429	3	1.01088	Q8IWX7	UN45B_HUMAN	Protein unc-45 homolog B	69	78	AIDINSSDIK	A1dEN5GlcNAcK10dE	73	N2H8F0S0	01Y41Y41M(31M21M21M31G)61M(31M)61M	Mannose	102.84	1	N,1;	0
TR2	19164	87.34	964.43	964.429	3	1.01088	Q8IWX7	UN45B_HUMAN	Protein unc-45 homolog B	69	78	AIDINSSDIK	A1dEN5GlcNAcK10dE	73	N2H8F0S0	01Y41Y41M(31M21M21M)61M(31M21M)61M	Mannose	100.45	1	N,1;	0
TR2	19169	87.36	1317.09	1317.09	2	0.283367	Q13813	SPTN1_HUMAN	Spectrin alpha chain, non-erythrocytic 1	1142	1148	ANESRLK	A1dEN2GlcNAcK7dE	1143	N2H8F0S0	01Y41Y41M(31M21M21M)61M(31M21M)61M	Mannose	131.76	1	N,1;	2	iI3-3-X45/C,iI2-3-X02/C,
TR2	19169	87.36	1317.09	1317.08	2	4.53368	Q8IY18	SMC5_HUMAN	Structural maintenance of chromosomes protein 5	919	925	ENISQVK	E1dEN2GlcNAcK7dE	920	N2H8F0S0	01Y41Y41M(31M21M)61M(31M21M)61M21M	Mannose	125.15	2	N,0;	1	iI2-3-B/Y,C/Z,
TR2	19169	87.36	1317.09	1317.08	2	4.53368	Q8IY18	SMC5_HUMAN	Structural maintenance of chromosomes protein 5	919	925	ENISQVK	E1dEN2GlcNAcK7dE	920	N2H8F0S0	01Y41Y41M(31M21M21M)61M(31M21M)61M	Mannose	125.15	2	N,0;	2	iI3-3-X45/C,iI2-3-X02/C,
TR2	19169	87.36	1317.09	1317.09	2	0.283367	Q13813	SPTN1_HUMAN	Spectrin alpha chain, non-erythrocytic 1	1142	1148	ANESRLK	A1dEN2GlcNAcK7dE	1143	N2H8F0S0	01Y41Y41M(31M21M)61M(31M21M)61M21M	Mannose	124.12	2	N,1;	1	iI2-3-B/Y,C/Z,
TR2	19169	87.36	1317.09	1317.09	2	0.283367	O60303	K0556_HUMAN	Protein KIAA0556	274	280	ERNLSAK	E1dEN3GlcNAcK7dE	276	N2H8F0S0	01Y41Y41M(31M21M)61M(31M21M)61M21M	Mannose	119.64	2	N,1;	1	iI2-3-B/Y,C/Z,
TR2	19169	87.36	1317.09	1317.08	2	4.53368	Q8IY18	SMC5_HUMAN	Structural maintenance of chromosomes protein 5	919	925	ENISQVK	E1dEN2GlcNAcK7dE	920	N2H8F0S0	01Y41Y41M(31M21M21M31G)61M(31M)61M	Mannose	117.51	1	N,0;	0
TR2	19169	87.36	1317.09	1317.09	2	0.283367	Q9UGN5	PARP2_HUMAN	Poly [ADP-ribose] polymerase 2	16	22	ALNESKR	A1dEN3GlcNAcK6dE	18	N2H8F0S0	01Y41Y41M(31M21M)61M(31M21M)61M21M	Mannose	115.48	2	N,1;	1	iI2-3-B/Y,C/Z,
TR2	19169	87.36	1317.09	1317.09	2	0.283367	O15031	PLXB2_HUMAN	Plexin-B2	124	131	ALSNISLR	A1dEN4GlcNAc	127	N2H8F0S0	01Y41Y41M(31M21M)61M(31M21M)61M21M	Mannose	115.28	2	N,1;	1	iI2-3-B/Y,C/Z,
TR2	19169	87.36	1317.09	1317.09	2	0.283367	Q9UBT2	SAE2_HUMAN	SUMO-activating enzyme subunit 2	618	624	ENLSAKR	E1dEN2GlcNAcK6dE	619	N2H8F0S0	01Y41Y41M(31M21M)61M(31M21M)61M21M	Mannose	113.57	2	N,0;	1	iI2-3-B/Y,C/Z,
TR1	19174	87.37	1271.49	1271.5	3	-2.33454	Q9Y6N6	LAMC3_HUMAN	Laminin subunit gamma-3	316	332	GTAEAAHECLPCNCSGR	G1dEC9CamC12CamN13GlcNAcC14Cam	328	N2H9F0S0	01Y41Y41M(31M21M21M)61M(31M21M)61M21M	Mannose	140.42	1	N,0;	0
TR2	19170	87.37	1314.54	1314.54	2	0.716995	P04628	WNT1_HUMAN	Proto-oncogene Wnt-1	295	304	SPNFCTYSGR	S1dEN3GlcNAcC5Cam	297	N2H6F0S0	01Y41Y41M(31M)61M(31M21M)61M	Mannose	80.78	1	N,0;	1	iI2-3-B/Y,C/Z,
TR2	19170	87.37	1314.54	1314.54	2	0.716995	P04628	WNT1_HUMAN	Proto-oncogene Wnt-1	295	304	SPNFCTYSGR	S1dEN3GlcNAcC5Cam	297	N2H6F0S0	01Y41Y41M(31M21M)61M(31M)61M	Mannose	78.21	1	N,0;	1	iI2-3-B/Y,C/Z,
TR2	19170	87.37	1314.54	1314.55	2	-6.04733	Q3MIT2	PUS10_HUMAN	Putative tRNA pseudouridine synthase Pus10	332	342	AESFNFSSSGR	A1dEN5GlcNAc	336	N2H6F0S0	01Y41Y41M(31M)61M(31M21M)61M	Mannose	76.41	1	N,0;	1	iI2-3-B/Y,C/Z,
TR2	19170	87.37	1314.54	1314.55	2	-6.04733	Q3MIT2	PUS10_HUMAN	Putative tRNA pseudouridine synthase Pus10	332	342	AESFNFSSSGR	A1dEN5GlcNAc	336	N2H6F0S0	01Y41Y41M(31M21M)61M(31M)61M	Mannose	73.88	1	N,0;	1	iI2-3-B/Y,C/Z,
TR2	19170	87.37	1315.04	1315.04	2	-2.5293	Q9Y4G6	TLN2_HUMAN	Talin-2	1503	1512	HTSALCNACR	H1dEC6CamN7GlcNAcC9Cam	1509	N2H6F0S0	01Y41Y41M(31M)61M(31M21M)61M	Mannose	61.61	1	N,0;	1	iI2-3-B/Y,C/Z,
TR2	19170	87.37	1315.04	1315.04	2	-2.5293	Q9Y4G6	TLN2_HUMAN	Talin-2	1503	1512	HTSALCNACR	H1dEC6CamN7GlcNAcC9Cam	1509	N2H6F0S0	01Y41Y41M(31M21M)61M(31M)61M	Mannose	59.17	1	N,0;	1	iI2-3-B/Y,C/Z,
TR2	19170	87.37	1315.04	1315.04	2	1.9968	Q8N3J3	CQ053_HUMAN	Uncharacterized protein C17orf53	319	329	TPNSSCSTPSR	T1dEN3GlcNAcC6Cam	321	N2H6F0S0	01Y41Y41M(31M)61M(31M21M)61M	Mannose	58.04	1	N,0;	1	iI2-3-B/Y,C/Z,
TR2	19177	87.4	1398.11	1398.1	2	8.80271	O00192	ARVC_HUMAN	Armadillo repeat protein deleted in velo-cardio-facial syndrome	735	741	NLSLDRR	N1GlcNAc@dE	735	N2H9F0S0	01Y41Y41M(31M21M21M)61M(31M21M)61M21M	Mannose	154.48	1	N,0;	0
TR2	19177	87.4	1398.11	1398.1	2	8.80271	O00192	ARVC_HUMAN	Armadillo repeat protein deleted in velo-cardio-facial syndrome	735	741	NLSLDRR	N1GlcNAc@dE	735	N2H9F0S0	01Y41Y41M(31M21M21M31G)61M(31M21M)61M	Mannose	146.38	1	N,0;	0
TR2	19214	87.59	1208.53	1208.53	2	3.0895	P10253	LYAG_HUMAN	Lysosomal alpha-glucosidase	386	393	QVVENMTR	Q1dEN5GlcNAc	390	N2H6F0S0	01Y41Y41M(31M)61M(31M21M)61M	Mannose	112.97	1	N,1;	1	iI2-3-B/Y,C/Z,
TR2	19214	87.59	1208.53	1208.53	2	3.0895	P10253	LYAG_HUMAN	Lysosomal alpha-glucosidase	386	393	QVVENMTR	Q1dEN5GlcNAc	390	N2H6F0S0	01Y41Y41M(31M21M)61M(31M)61M	Mannose	110.27	1	N,1;	1	iI2-3-B/Y,C/Z,
TR2	19214	87.59	1208.53	1208.53	2	-4.26903	P06213	INSR_HUMAN	Insulin receptor	1058	1066	TVNESASLR	T1dEN3GlcNAc	1060	N2H6F0S0	01Y41Y41M(31M)61M(31M21M)61M	Mannose	95.89	2	N,0;	2	iI2-3-B/Y,C/Z,15XI4,
TR2	19214	87.59	1208.53	1208.53	2	-4.26903	P06213	INSR_HUMAN	Insulin receptor	1058	1066	TVNESASLR	T1dEN3GlcNAc	1060	N2H6F0S0	01Y41Y41M(31M21M)61M(31M)61M	Mannose	95.89	2	N,0;	2	iI2-3-B/Y,C/Z,03XI3,
TR3	19329	87.68	1033.45	1033.44	3	2.81	P41180	CASR_HUMAN	Extracellular calcium-sensing receptor	442	453	GLFTNGSCADIK	G1dEN5GlcNAcC8CamK12dE	446	N2H8F0S0	01Y41Y41M(31M21M)61M(31M21M)61M21M	Mannose	85.92	3	N,1;	1	iI2-3-B/Y,C/Z,
TR3	19329	87.68	1033.45	1033.44	3	2.81	P41180	CASR_HUMAN	Extracellular calcium-sensing receptor	442	453	GLFTNGSCADIK	G1dEN5GlcNAcC8CamK12dE	446	N2H8F0S0	01Y41Y41M(31M21M21M)61M(31M21M)61M	Mannose	85.92	3	N,1;	0
TR3	19329	87.68	1033.45	1033.44	3	2.81	P41180	CASR_HUMAN	Extracellular calcium-sensing receptor	442	453	GLFTNGSCADIK	G1dEN5GlcNAcC8CamK12dE	446	N2H8F0S0	01Y41Y41M(31M21M21M31G)61M(31M)61M	Mannose	85.92	3	N,1;	0
TR3	19329	87.68	1033.45	1033.45	3	1.5869	Q9UHD4	CIDEB_HUMAN	Cell death activator CIDE-B	15	26	SVSNISSEFGRR	S1dEN4GlcNAc	18	N2H8F0S0	01Y41Y41M(31M21M21M)61M(31M21M)61M	Mannose	82.44	2	N,1;	0
TR3	19329	87.68	1033.45	1033.45	3	1.5869	Q9UHD4	CIDEB_HUMAN	Cell death activator CIDE-B	15	26	SVSNISSEFGRR	S1dEN4GlcNAc	18	N2H8F0S0	01Y41Y41M(31M21M21M31G)61M(31M)61M	Mannose	82.44	2	N,1;	0
TR3	19329	87.68	1033.45	1033.45	3	1.5869	Q9UHD4	CIDEB_HUMAN	Cell death activator CIDE-B	15	26	SVSNISSEFGRR	S1dEN4GlcNAc	18	N2H8F0S0	01Y41Y41M(31M21M)61M(31M21M)61M21M	Mannose	79.97	1	N,1;	1	iI2-3-B/Y,C/Z,
TR1	19236	87.68	1328.55	1328.55	2	2.73075	O60637	TSN3_HUMAN	Tetraspanin-3	167	176	NQSVPLSCCR	N1GlcNAc@dEC8CamC9Cam	167	N2H6F0S0	01Y41Y41M(31M)61M(31M21M)61M	Mannose	64	1	N,0;	1	iI2-3-B/Y,C/Z,
TR1	19236	87.68	1328.55	1328.55	2	2.73075	O60637	TSN3_HUMAN	Tetraspanin-3	167	176	NQSVPLSCCR	N1GlcNAc@dEC8CamC9Cam	167	N2H6F0S0	01Y41Y41M(31M21M)61M(31M)61M	Mannose	59.98	1	N,0;	1	iI2-3-B/Y,C/Z,
TR3	19360	87.84	1476.59	1476.59	2	-1.17066	P04628	WNT1_HUMAN	Proto-oncogene Wnt-1	295	304	SPNFCTYSGR	S1dEN3GlcNAcC5Cam	297	N2H8F0S0	01Y41Y41M(31M21M21M)61M(31M21M)61M	Mannose	118.39	1	N,0;	0
TR3	19360	87.84	1476.59	1476.59	2	-1.17066	P04628	WNT1_HUMAN	Proto-oncogene Wnt-1	295	304	SPNFCTYSGR	S1dEN3GlcNAcC5Cam	297	N2H8F0S0	01Y41Y41M(31M21M)61M(31M21M)61M21M	Mannose	115.67	1	N,0;	2	iI3-4-X25/B,iI2-3-B/Y,C/Z,
TR3	19360	87.84	1476.59	1476.6	2	-7.19125	Q3MIT2	PUS10_HUMAN	Putative tRNA pseudouridine synthase Pus10	332	342	AESFNFSSSGR	A1dEN5GlcNAc	336	N2H8F0S0	01Y41Y41M(31M21M21M)61M(31M21M)61M	Mannose	103.92	2	N,0;	0
TR3	19360	87.84	1476.59	1476.6	2	-7.19125	Q3MIT2	PUS10_HUMAN	Putative tRNA pseudouridine synthase Pus10	332	342	AESFNFSSSGR	A1dEN5GlcNAc	336	N2H8F0S0	01Y41Y41M(31M21M21M31G)61M(31M)61M	Mannose	103.92	2	N,0;	0
TR3	19360	87.84	1476.59	1476.6	2	-7.19125	Q3MIT2	PUS10_HUMAN	Putative tRNA pseudouridine synthase Pus10	332	342	AESFNFSSSGR	A1dEN5GlcNAc	336	N2H8F0S0	01Y41Y41M(31M21M)61M(31M21M)61M21M	Mannose	95.97	1	N,0;	2	iI3-4-X25/B,iI2-3-B/Y,C/Z,
TR3	19360	87.84	1476.59	1476.6	2	-8.32425	Q9BTV4	TMM43_HUMAN	Transmembrane protein 43	1	11	MAANYSSTSTR	M1dEN4GlcNAc	4	N2H8F0S0	01Y41Y41M(31M21M21M)61M(31M21M)61M	Mannose	95.22	2	N,1;	0
TR3	19360	87.84	1476.59	1476.6	2	-8.32425	Q9BTV4	TMM43_HUMAN	Transmembrane protein 43	1	11	MAANYSSTSTR	M1dEN4GlcNAc	4	N2H8F0S0	01Y41Y41M(31M21M21M31G)61M(31M)61M	Mannose	95.22	2	N,1;	0
TR3	19360	87.84	1476.59	1476.6	2	-8.32425	Q9BTV4	TMM43_HUMAN	Transmembrane protein 43	1	11	MAANYSSTSTR	M1dEN4GlcNAc	4	N2H8F0S0	01Y41Y41M(31M21M)61M(31M21M)61M21M	Mannose	87.33	1	N,1;	2	iI3-4-X25/B,iI2-3-B/Y,C/Z,
TR3	19370	87.89	1395.56	1395.57	2	-5.90972	Q3MIT2	PUS10_HUMAN	Putative tRNA pseudouridine synthase Pus10	332	342	AESFNFSSSGR	A1dEN5GlcNAc	336	N2H7F0S0	01Y41Y41M(31M21M21M)61M(31M)61M	Mannose	86.45	2	N,0;	1	iI2-3-B/Y,C/Z,iIII2-3-B/Y,C/Z,
TR3	19371	87.9	923.752	923.754	3	-3.16439	Q92997	DVL3_HUMAN	Segment polarity protein dishevelled homolog DVL-3	158	166	LNGTAKGER	L1dEN2GlcNAcK6dE	159	N2H8F0S0	01Y41Y41M(31M21M21M31G)61M(31M)61M	Mannose	65.39	1	N,0;	0
TR3	19371	87.9	923.752	923.754	3	-3.16439	O75182	SIN3B_HUMAN	Paired amphipathic helix protein Sin3b	613	620	QNDTKALR	Q1dEN2GlcNAcK5dE	614	N2H8F0S0	01Y41Y41M(31M21M21M31G)61M(31M)61M	Mannose	63.79	1	N,0;	0
TR3	19371	87.9	923.752	923.754	3	-3.16439	O75182	SIN3B_HUMAN	Paired amphipathic helix protein Sin3b	613	620	QNDTKALR	Q1dEN2GlcNAcK5dE	614	N2H8F0S0	01Y41Y41M(31M21M21M)61M(31M21M)61M	Mannose	61.59	1	N,0;	0
TR3	19371	87.9	924.089	924.086	3	2.961	Q9H2Y7	ZN106_HUMAN	Zinc finger protein 106	334	343	VSGKNGSAAR	V1dEK4dEN5GlcNAc	338	N2H8F0S0	01Y41Y41M(31M21M21M)61M(31M21M)61M	Mannose	54.3	2	N,0;	0
TR3	19371	87.9	924.089	924.086	3	2.961	Q9H2Y7	ZN106_HUMAN	Zinc finger protein 106	334	343	VSGKNGSAAR	V1dEK4dEN5GlcNAc	338	N2H8F0S0	01Y41Y41M(31M21M21M31G)61M(31M)61M	Mannose	54.3	2	N,0;	0
TR3	19371	87.9	924.089	924.086	3	2.961	Q9H2Y7	ZN106_HUMAN	Zinc finger protein 106	334	343	VSGKNGSAAR	V1dEK4dEN5GlcNAc	338	N2H8F0S0	01Y41Y41M(31M21M)61M(31M21M)61M21M	Mannose	47.99	1	N,0;	1	iI2-3-B/Y,C/Z,
TR1	19286	87.93	1078.46	1078.46	3	-0.174069	A6NN14	ZN729_HUMAN	Zinc finger protein 729	440	449	AFNSSSTLMK	A1dEN3GlcNAcK10dE	442	N2H10F0S0	01Y41Y41M(31M21M21M31G)61M(31M21M)61M21M	Mannose	139.66	1	N,1;	1	iI2-3-X25/C,
TR1	19286	87.93	1078.46	1078.46	3	-0.174069	A6NN14	ZN729_HUMAN	Zinc finger protein 729	440	449	AFNSSSTLMK	A1dEN3GlcNAcK10dE	442	N2H10F0S0	01Y41Y41M(31M21M21M31G31G)61M(31M21M)61M	Mannose	137.16	1	N,1;	0
TR1	19286	87.93	1078.8	1078.8	3	-1.81717	Q96PP4	TSG13_HUMAN	Testis-specific gene 13 protein	14	23	SKTSENSSAK	S1dEK2dEN6GlcNAcK10dE	19	N2H10F0S0	01Y41Y41M(31M21M21M31G)61M(31M21M)61M21M	Mannose	117.21	1	N,0;	1	iI2-3-X25/C,
TR1	19286	87.93	1078.8	1078.8	3	0.249011	Q7RTY8	TMPS7_HUMAN	Transmembrane protease serine 7	202	211	DSIQTSIINR	D1dEN9GlcNAc	210	N2H10F0S0	01Y41Y41M(31M21M21M31G)61M(31M21M)61M21M	Mannose	117.17	1	N,1;	1	iI2-3-X25/C,
TR1	19286	87.93	1078.8	1078.8	3	-1.81717	Q96PP4	TSG13_HUMAN	Testis-specific gene 13 protein	14	23	SKTSENSSAK	S1dEK2dEN6GlcNAcK10dE	19	N2H10F0S0	01Y41Y41M(31M21M21M31G31G)61M(31M21M)61M	Mannose	114.81	1	N,0;	0
TR1	19286	87.93	1078.8	1078.8	3	0.249011	Q7RTY8	TMPS7_HUMAN	Transmembrane protease serine 7	202	211	DSIQTSIINR	D1dEN9GlcNAc	210	N2H10F0S0	01Y41Y41M(31M21M21M31G31G)61M(31M21M)61M	Mannose	114.74	1	N,1;	0
TR1	19286	87.93	1079.14	1079.15	3	-10.8852	Q8TD23	ZN675_HUMAN	Zinc finger protein 675	544	553	AFNQSANLTK	A1dEN3GlcNAcK10dE	546	N6H5F0S0	01Y41Y41M(31M)61M(21Y41L31Y)61Y41L31Y	Complex	63.11	2	N,1;	0
TR1	19286	87.93	1079.14	1079.15	3	-10.8852	Q8TD23	ZN675_HUMAN	Zinc finger protein 675	544	553	AFNQSANLTK	A1dEN3GlcNAcK10dE	546	N6H5F0S0	01Y41Y41M(31M)61M(21Y41L31Y41V)61Y41L	Complex	63.11	2	N,1;	0
TR1	19286	87.93	1079.14	1079.15	3	-10.8852	Q8TD23	ZN675_HUMAN	Zinc finger protein 675	544	553	AFNQSANLTK	A1dEN7GlcNAcK10dE	550	N6H5F0S0	01Y41Y41M(31M)61M(21Y41L31Y)61Y41L31Y	Complex	63.11	2	N,0;	0
TR1	19286	87.93	1079.14	1079.15	3	-10.8852	Q8TD23	ZN675_HUMAN	Zinc finger protein 675	544	553	AFNQSANLTK	A1dEN7GlcNAcK10dE	550	N6H5F0S0	01Y41Y41M(31M)61M(21Y41L31Y41V)61Y41L	Complex	63.11	2	N,0;	0
TR1	19286	87.93	1079.14	1079.15	3	-10.8852	Q8TD23	ZN675_HUMAN	Zinc finger protein 675	544	553	AFNQSANLTK	A1dEN3GlcNAcK10dE	546	N6H5F0S0	01Y41Y41M(31M(21Y41L31Y41V)41Y)61M61M	Hybrid	58.69	1	N,1;	3	iII3-3-B/Y,C/Z,iII3-3-B/Y,C/Z,iII4III4Y,
TR1	19286	87.93	1079.14	1079.15	3	-10.8852	Q8TD23	ZN675_HUMAN	Zinc finger protein 675	544	553	AFNQSANLTK	A1dEN7GlcNAcK10dE	550	N6H5F0S0	01Y41Y41M(31M(21Y41L31Y41V)41Y)61M61M	Hybrid	58.69	1	N,0;	3	iII3-3-B/Y,C/Z,iII3-3-B/Y,C/Z,iII4III4Y,
TR3	19380	87.95	1385.13	1385.12	2	9.09568	Q9Y4L1	HYOU1_HUMAN	Hypoxia up-regulated protein 1	869	877	NATLAEQAK	N1GlcNAc@dEK9dE	869	N2H8F0S0	01Y41Y41M(31M21M)61M(31M21M)61M21M	Mannose	162.49	1	N,0;	1	iI2-3-B/Y,C/Z,
TR3	19380	87.95	1385.13	1385.12	2	9.09568	Q9Y4L1	HYOU1_HUMAN	Hypoxia up-regulated protein 1	869	877	NATLAEQAK	N1GlcNAc@dEK9dE	869	N2H8F0S0	01Y41Y41M(31M21M21M)61M(31M21M)61M	Mannose	159.85	1	N,0;	0
TR3	19380	87.95	1385.13	1385.12	2	9.09568	P54289	CA2D1_HUMAN	Voltage-dependent calcium channel subunit alpha-2/delta-1	320	328	DAVNNITAK	D1dEN5GlcNAcK9dE	324	N2H8F0S0	01Y41Y41M(31M21M)61M(31M21M)61M21M	Mannose	131.35	1	N,0;	1	iI2-3-B/Y,C/Z,
TR3	19380	87.95	1385.13	1385.12	2	9.09568	P54289	CA2D1_HUMAN	Voltage-dependent calcium channel subunit alpha-2/delta-1	320	328	DAVNNITAK	D1dEN5GlcNAcK9dE	324	N2H8F0S0	01Y41Y41M(31M21M21M)61M(31M21M)61M	Mannose	128.71	1	N,0;	0
TR3	19380	87.95	1385.13	1385.13	2	5.05486	Q92997	DVL3_HUMAN	Segment polarity protein dishevelled homolog DVL-3	158	166	LNGTAKGER	L1dEN2GlcNAcK6dE	159	N2H8F0S0	01Y41Y41M(31M21M)61M(31M21M)61M21M	Mannose	127.37	1	N,0;	1	iI2-3-B/Y,C/Z,
TR3	19380	87.95	1385.13	1385.13	2	5.05486	Q92997	DVL3_HUMAN	Segment polarity protein dishevelled homolog DVL-3	158	166	LNGTAKGER	L1dEN2GlcNAcK6dE	159	N2H8F0S0	01Y41Y41M(31M21M21M)61M(31M21M)61M	Mannose	124.73	1	N,0;	0
TR2	19296	88	886.731	886.727	3	4.37918	Q13214	SEM3B_HUMAN	Semaphorin-3B	119	125	LLHAYNR	L1dEN6GlcNAc	124	N3H5F0S1	01Y41Y41M(31M41Y41L32S)61M61M	Hybrid	67.38	1	N,1;	27	02AII2,BII2,BI1,BI2,iII3-3-B/Y,C/Z,BII1,iI3-3-X25/B,15AI2,35AII4,35AII3,iII4-6-B/Y,C/Z,YI1,BII3,YI2,iII2-3-B/Y,C/Z,iI3II3Y,iI3II4Y,iI4II3Y,iI4II4Y,YII3,YII4,02XI1,iI4II6Y,YII5,YI1,YII6,YI2,iI3II3Y,iI3II4Y,iI4II3Y,iI4II4Y,YII3,YII4,
TR1	19314	88.07	887.424	887.424	3	-0.731189	O43395	PRPF3_HUMAN	U4/U6 small nuclear ribonucleoprotein Prp3	548	556	VRNLSNPAK	V1dEN3GlcNAcK9dE	550	N2H7F0S0	01Y41Y41M(31M21M)61M(31M21M)61M	Mannose	61.57	2	N,0;	1	iI2-3-B/Y,C/Z,
TR1	19314	88.07	887.424	887.424	3	-0.731189	O43395	PRPF3_HUMAN	U4/U6 small nuclear ribonucleoprotein Prp3	548	556	VRNLSNPAK	V1dEN3GlcNAcK9dE	550	N2H7F0S0	01Y41Y41M(31M21M21M)61M(31M)61M	Mannose	61.57	2	N,0;	0
TR1	19314	88.07	887.424	887.424	3	-0.731189	O43395	PRPF3_HUMAN	U4/U6 small nuclear ribonucleoprotein Prp3	548	556	VRNLSNPAK	V1dEN3GlcNAcK9dE	550	N2H7F0S0	01Y41Y41M(31M)61M(31M21M)61M21M	Mannose	59.46	1	N,0;	5	iI2-3-X15/C,iI2-3-X35/B,iI2-3-X45/C,iI2-3-A35/Z,iI2-3-B/Y,C/Z,
TR3	19407	88.08	1018.45	1018.44	3	8.16061	O00587	MFNG_HUMAN	Beta-1,3-N-acetylglucosaminyltransferase manic fringe	26	34	YHLNLSPQR	Y1dEN4GlcNAc	29	N2H9F0S0	01Y41Y41M(31M21M21M)61M(31M21M)61M21M	Mannose	97.39	1	N,1;	0
TR3	19407	88.08	1018.45	1018.44	3	8.16061	O00587	MFNG_HUMAN	Beta-1,3-N-acetylglucosaminyltransferase manic fringe	26	34	YHLNLSPQR	Y1dEN4GlcNAc	29	N2H9F0S0	01Y41Y41M(31M21M21M31G)61M(31M21M)61M	Mannose	95.04	1	N,1;	0
TR1	19347	88.24	1024.78	1024.78	3	0.345134	Q9BSK4	FEM1A_HUMAN	Protein fem-1 homolog A	112	121	TTRTNSTPLR	T1dEN5GlcNAc	116	N2H9F0S0	01Y41Y41M(31M21M21M31G31G)61M(31M)61M	Mannose	100.62	1	N,0;	0
TR1	19360	88.3	1022.44	1022.44	3	2.04251	O15440	MRP5_HUMAN	Multidrug resistance-associated protein 5	682	692	GANLSGGQRQR	G1dEN3GlcNAc	684	N2H9F0S0	01Y41Y41M(31M21M21M31G)61M(31M21M)61M	Mannose	172.36	1	N,1;	0
TR3	19461	88.35	964.096	964.095	3	1.21167	Q02809	PLOD1_HUMAN	Procollagen-lysine,2-oxoglutarate 5-dioxygenase 1	534	541	YIHQNYTK	Y1dEN5GlcNAcK8dE	538	N2H8F0S0	01Y41Y41M(31M21M)61M(31M21M)61M21M	Mannose	194.39	2	N,4;	1	iI2-3-B/Y,C/Z,
TR3	19461	88.35	964.096	964.093	3	2.61713	Q9NVV4	PAPD1_HUMAN	Poly(A) RNA polymerase, mitochondrial	563	571	GNRTENFTK	G1dEN2GlcNAcK9dE	564	N2H8F0S0	01Y41Y41M(31M21M)61M(31M21M)61M21M	Mannose	150.82	2	N,0;	1	iI2-3-B/Y,C/Z,
TR3	19461	88.35	964.096	964.093	3	2.61713	Q9NVV4	PAPD1_HUMAN	Poly(A) RNA polymerase, mitochondrial	563	571	GNRTENFTK	G1dEN6GlcNAcK9dE	568	N2H8F0S0	01Y41Y41M(31M21M)61M(31M21M)61M21M	Mannose	150.82	2	N,0;	1	iI2-3-B/Y,C/Z,
TR3	19461	88.35	964.096	964.097	3	-0.816142	O75179	ANR17_HUMAN	Ankyrin repeat domain-containing protein 17	1559	1568	NNTITTTSSK	N1GlcNAc@dEK10dE	1559	N2H8F0S0	01Y41Y41M(31M21M)61M(31M21M)61M21M	Mannose	142.75	2	N,0;	1	iI2-3-B/Y,C/Z,
TR3	19461	88.35	964.096	964.097	3	-0.816142	O75179	ANR17_HUMAN	Ankyrin repeat domain-containing protein 17	1559	1568	NNTITTTSSK	N1GlcNAc@dEK10dE	1559	N2H8F0S0	01Y41Y41M(31M21M21M)61M(31M21M)61M	Mannose	142.75	2	N,0;	0
TR3	19461	88.35	964.096	964.091	3	5.33265	Q13153	PAK1_HUMAN	Serine/threonine-protein kinase PAK 1	19	29	NTSTMIGAGSK	N1GlcNAc@dEK11dE	19	N2H8F0S0	01Y41Y41M(31M21M)61M(31M21M)61M21M	Mannose	141.75	2	N,0;	1	iI2-3-B/Y,C/Z,
TR3	19461	88.35	964.096	964.091	3	5.33265	Q13153	PAK1_HUMAN	Serine/threonine-protein kinase PAK 1	19	29	NTSTMIGAGSK	N1GlcNAc@dEK11dE	19	N2H8F0S0	01Y41Y41M(31M21M21M)61M(31M21M)61M	Mannose	141.75	2	N,0;	0
TR3	19461	88.35	964.096	964.102	3	-6.09255	Q9H967	WDR76_HUMAN	WD repeat-containing protein 76	606	616	YILAGGNSSGK	Y1dEN7GlcNAcK11dE	612	N2H8F0S0	01Y41Y41M(31M21M21M)61M(31M21M)61M	Mannose	136.82	1	N,0;	0
TR3	19461	88.35	964.096	964.097	3	-0.816142	O75179	ANR17_HUMAN	Ankyrin repeat domain-containing protein 17	1559	1568	NNTITTTSSK	N1GlcNAc@dEK10dE	1559	N2H8F0S0	01Y41Y41M(31M21M21M31G)61M(31M)61M	Mannose	135.28	1	N,0;	0
TR3	19461	88.35	964.096	964.102	3	-6.09255	Q9H967	WDR76_HUMAN	WD repeat-containing protein 76	606	616	YILAGGNSSGK	Y1dEN7GlcNAcK11dE	612	N2H8F0S0	01Y41Y41M(31M21M)61M(31M21M)61M21M	Mannose	134.34	1	N,0;	1	iI2-3-B/Y,C/Z,
TR3	19461	88.35	964.096	964.091	3	5.33265	Q13153	PAK1_HUMAN	Serine/threonine-protein kinase PAK 1	19	29	NTSTMIGAGSK	N1GlcNAc@dEK11dE	19	N2H8F0S0	01Y41Y41M(31M21M21M31G)61M(31M)61M	Mannose	134.26	1	N,0;	0
TR3	19461	88.35	964.096	964.086	3	10.132	P15509	CSF2R_HUMAN	Granulocyte-macrophage colony-stimulating factor receptor subunit alpha	218	227	FNPPSNVTVR	F1dEN6GlcNAc	223	N2H8F0S0	01Y41Y41M(31M21M21M)61M(31M21M)61M	Mannose	124.11	2	N,2;	0
TR3	19461	88.35	964.096	964.086	3	10.132	P15509	CSF2R_HUMAN	Granulocyte-macrophage colony-stimulating factor receptor subunit alpha	218	227	FNPPSNVTVR	F1dEN6GlcNAc	223	N2H8F0S0	01Y41Y41M(31M21M21M31G)61M(31M)61M	Mannose	124.11	2	N,2;	0
TR3	19461	88.35	964.096	964.086	3	10.132	P15509	CSF2R_HUMAN	Granulocyte-macrophage colony-stimulating factor receptor subunit alpha	218	227	FNPPSNVTVR	F1dEN6GlcNAc	223	N2H8F0S0	01Y41Y41M(31M21M)61M(31M21M)61M21M	Mannose	107.04	1	N,2;	1	iI2-3-B/Y,C/Z,
TR3	19464	88.36	1317.58	1317.57	2	7.77139	Q9H019	MFR1L_HUMAN	Mitochondrial fission regulator 1-like	101	108	NASVPNLR	N1GlcNAc@dE	101	N2H8F0S0	01Y41Y41M(31M21M)61M(31M21M)61M21M	Mannose	129.36	2	N,0;	1	iI2-3-B/Y,C/Z,
TR3	19464	88.36	1317.58	1317.57	2	7.77139	Q9H019	MFR1L_HUMAN	Mitochondrial fission regulator 1-like	101	108	NASVPNLR	N1GlcNAc@dE	101	N2H8F0S0	01Y41Y41M(31M21M21M)61M(31M21M)61M	Mannose	129.36	2	N,0;	0
TR3	19464	88.36	1317.58	1317.58	2	3.52417	Q92886	NGN1_HUMAN	Neurogenin-1	50	57	RGAPNISR	R1dEN5GlcNAc	54	N2H8F0S0	01Y41Y41M(31M21M)61M(31M21M)61M21M	Mannose	129.36	2	N,1;	1	iI2-3-B/Y,C/Z,
TR3	19464	88.36	1317.58	1317.58	2	3.52417	Q92886	NGN1_HUMAN	Neurogenin-1	50	57	RGAPNISR	R1dEN5GlcNAc	54	N2H8F0S0	01Y41Y41M(31M21M21M)61M(31M21M)61M	Mannose	129.36	2	N,1;	0
TR3	19464	88.36	1317.58	1317.58	2	0.982386	A6NGG8	PCARE_HUMAN	Photoreceptor cilium actin regulator	66	72	RNQTTAK	R1dEN2GlcNAcK7dE	67	N2H8F0S0	01Y41Y41M(31M21M)61M(31M21M)61M21M	Mannose	128.84	1	N,2;	1	iI2-3-B/Y,C/Z,
TR3	19464	88.36	1317.58	1317.57	2	7.77139	Q9H019	MFR1L_HUMAN	Mitochondrial fission regulator 1-like	101	108	NASVPNLR	N1GlcNAc@dE	101	N2H8F0S0	01Y41Y41M(31M21M21M31G)61M(31M)61M	Mannose	124.25	1	N,0;	0
TR3	19464	88.36	1317.58	1317.58	2	3.52417	Q92886	NGN1_HUMAN	Neurogenin-1	50	57	RGAPNISR	R1dEN5GlcNAc	54	N2H8F0S0	01Y41Y41M(31M21M21M31G)61M(31M)61M	Mannose	124.25	1	N,1;	0
TR3	19464	88.36	1317.58	1317.58	2	0.982386	A6NGG8	PCARE_HUMAN	Photoreceptor cilium actin regulator	66	72	RNQTTAK	R1dEN2GlcNAcK7dE	67	N2H8F0S0	01Y41Y41M(31M21M21M)61M(31M21M)61M	Mannose	123.77	1	N,2;	0
TR3	19464	88.36	1317.58	1317.58	2	4.99885	Q9UBC3	DNM3B_HUMAN	DNA (cytosine-5)-methyltransferase 3B	375	380	YENKTR	Y1dEN3GlcNAcK4dE	377	N2H8F0S0	01Y41Y41M(31M21M)61M(31M21M)61M21M	Mannose	121.98	2	N,1;	1	iI2-3-B/Y,C/Z,
TR3	19464	88.36	1317.58	1317.58	2	4.99885	Q9UBC3	DNM3B_HUMAN	DNA (cytosine-5)-methyltransferase 3B	375	380	YENKTR	Y1dEN3GlcNAcK4dE	377	N2H8F0S0	01Y41Y41M(31M21M21M)61M(31M21M)61M	Mannose	121.98	2	N,1;	0
TR3	19464	88.36	1317.58	1317.58	2	4.99885	Q9UBC3	DNM3B_HUMAN	DNA (cytosine-5)-methyltransferase 3B	375	380	YENKTR	Y1dEN3GlcNAcK4dE	377	N2H8F0S0	01Y41Y41M(31M21M21M31G)61M(31M)61M	Mannose	116.87	1	N,1;	0
TR3	19464	88.36	1317.58	1317.58	2	0.982386	P29460	IL12B_HUMAN	Interleukin-12 subunit beta	302	309	KNASISVR	K1dEN2GlcNAc	303	N2H8F0S0	01Y41Y41M(31M21M)61M(31M21M)61M21M	Mannose	115.84	1	N,1;	1	iI2-3-B/Y,C/Z,
TR3	19464	88.36	1317.58	1317.58	2	0.982386	P29460	IL12B_HUMAN	Interleukin-12 subunit beta	302	309	KNASISVR	K1dEN2GlcNAc	303	N2H8F0S0	01Y41Y41M(31M21M21M)61M(31M21M)61M	Mannose	110.77	1	N,1;	0
TR2	19375	88.4	940.054	940.054	3	0.885438	O60637	TSN3_HUMAN	Tetraspanin-3	167	176	NQSVPLSCCR	N1GlcNAc@dEC8CamC9Cam	167	N2H7F0S0	01Y41Y41M(31M)61M(31M21M)61M21M	Mannose	119.88	1	N,0;	4	iI2-3-X15/C,iI2-3-X35/B,iI2-3-X45/C,iI2-3-B/Y,C/Z,
TR3	19471	88.4	910.076	910.079	3	-3.23953	Q99698	LYST_HUMAN	Lysosomal-trafficking regulator	1634	1643	KTSLSSDSNK	K1dEN9GlcNAcK10dE	1642	N2H7F0S0	01Y41Y41M(31M)61M(31M21M)61M21M	Mannose	70.28	1	N,0;	4	iI2-3-X15/C,iI2-3-X35/B,iI2-3-X45/C,iI2-3-B/Y,C/Z,
TR2	19375	88.4	940.724	940.728	3	-3.81932	O94818	NOL4_HUMAN	Nucleolar protein 4	397	407	VNETDGVEAER	V1dEN2GlcNAc	398	N2H7F0S0	01Y41Y41M(31M21M)61M(31M21M)61M	Mannose	64.15	1	N,2;	1	iI2-3-B/Y,C/Z,
TR3	19471	88.4	910.076	910.072	3	4.49719	Q8N8J6	ZN615_HUMAN	Zinc finger protein 615	139	147	SNLSFENQK	S1dEN2GlcNAcK9dE	140	N2H7F0S0	01Y41Y41M(31M)61M(31M21M)61M21M	Mannose	62.68	1	N,1;	4	iI2-3-X15/C,iI2-3-X35/B,iI2-3-X45/C,iI2-3-B/Y,C/Z,
TR3	19471	88.4	910.076	910.076	3	0.397516	P08151	GLI1_HUMAN	Zinc finger protein GLI1	341	350	AFSNASDRAK	A1dEN4GlcNAcK10dE	344	N2H7F0S0	01Y41Y41M(31M)61M(31M21M)61M21M	Mannose	60.92	1	N,0;	4	iI2-3-X15/C,iI2-3-X35/B,iI2-3-X45/C,iI2-3-B/Y,C/Z,
TR2	19375	88.4	940.724	940.728	3	-3.81932	O94818	NOL4_HUMAN	Nucleolar protein 4	397	407	VNETDGVEAER	V1dEN2GlcNAc	398	N2H7F0S0	01Y41Y41M(31M)61M(31M21M)61M21M	Mannose	57.34	1	N,2;	4	iI2-3-X15/C,iI2-3-X35/B,iI2-3-X45/C,iI2-3-B/Y,C/Z,
TR3	19471	88.4	910.076	910.072	3	4.49719	Q8N8J6	ZN615_HUMAN	Zinc finger protein 615	139	147	SNLSFENQK	S1dEN2GlcNAcK9dE	140	N2H7F0S0	01Y41Y41M(31M21M)61M(31M21M)61M	Mannose	54.03	1	N,1;	1	iI2-3-B/Y,C/Z,
TR3	19471	88.4	910.076	910.076	3	0.397516	P08151	GLI1_HUMAN	Zinc finger protein GLI1	341	350	AFSNASDRAK	A1dEN4GlcNAcK10dE	344	N2H7F0S0	01Y41Y41M(31M21M)61M(31M21M)61M	Mannose	52.27	1	N,0;	1	iI2-3-B/Y,C/Z,
TR2	19377	88.41	994.073	994.071	3	1.78362	O60637	TSN3_HUMAN	Tetraspanin-3	167	176	NQSVPLSCCR	N1GlcNAc@dEC8CamC9Cam	167	N2H8F0S0	01Y41Y41M(31M21M21M31G)61M(31M)61M	Mannose	93.52	1	N,0;	0
TR2	19383	88.44	1271.5	1271.5	3	2.94575	Q9Y6N6	LAMC3_HUMAN	Laminin subunit gamma-3	316	332	GTAEAAHECLPCNCSGR	G1dEC9CamC12CamN13GlcNAcC14Cam	328	N2H9F0S0	01Y41Y41M(31M21M21M31G)61M(31M21M)61M	Mannose	200.61	1	N,1;	0
TR2	19383	88.44	1271.5	1271.5	3	2.94575	Q9Y6N6	LAMC3_HUMAN	Laminin subunit gamma-3	316	332	GTAEAAHECLPCNCSGR	G1dEC9CamC12CamN13GlcNAcC14Cam	328	N2H9F0S0	01Y41Y41M(31M21M21M31G31G)61M(31M)61M	Mannose	187.37	1	N,1;	0
TR3	19488	88.48	1398.61	1398.61	2	2.19762	A6NGG8	PCARE_HUMAN	Photoreceptor cilium actin regulator	66	72	RNQTTAK	R1dEN2GlcNAcK7dE	67	N2H9F0S0	01Y41Y41M(31M21M21M)61M(31M21M)61M21M	Mannose	128.52	2	N,1;	0
TR3	19488	88.48	1398.61	1398.61	2	2.19762	A6NGG8	PCARE_HUMAN	Photoreceptor cilium actin regulator	66	72	RNQTTAK	R1dEN2GlcNAcK7dE	67	N2H9F0S0	01Y41Y41M(31M21M21M31G)61M(31M21M)61M	Mannose	128.52	2	N,1;	0
TR3	19488	88.48	1398.61	1398.61	2	2.19762	A6NGG8	PCARE_HUMAN	Photoreceptor cilium actin regulator	66	72	RNQTTAK	R1dEN2GlcNAcK7dE	67	N2H9F0S0	01Y41Y41M(31M21M21M31G31G)61M(31M)61M	Mannose	115.18	1	N,1;	0
TR2	19402	88.54	1429.06	1429.06	2	1.22489	P78317	RNF4_HUMAN	E3 ubiquitin-protein ligase RNF4	169	177	NANTCPTCR	N1dEN3GlcNAcC5CamC8Cam	171	N2H8F0S0	01Y41Y41M(31M21M)61M(31M21M)61M21M	Mannose	148.48	1	N,0;	1	iI2-3-B/Y,C/Z,
TR2	19402	88.54	1429.06	1429.06	2	1.22489	P78317	RNF4_HUMAN	E3 ubiquitin-protein ligase RNF4	169	177	NANTCPTCR	N1dEN3GlcNAcC5CamC8Cam	171	N2H8F0S0	01Y41Y41M(31M21M21M)61M(31M21M)61M	Mannose	131.6	1	N,0;	0
TR1	19410	88.54	859.382	859.378	3	5.50769	P08962	CD63_HUMAN	CD63 antigen	129	138	NNHTASILDR	N1dEN2GlcNAc	130	N2H6F0S0	01Y41Y41M(31M)61M(31M21M)61M	Mannose	58.66	2	N,1;	4	iI2-3-X15/C,iI2-3-X35/B,iI2-3-X45/C,iI2-3-B/Y,C/Z,
TR1	19410	88.54	859.382	859.378	3	5.50769	P08962	CD63_HUMAN	CD63 antigen	129	138	NNHTASILDR	N1dEN2GlcNAc	130	N2H6F0S0	01Y41Y41M(31M21M)61M(31M)61M	Mannose	58.66	2	N,1;	1	iI2-3-B/Y,C/Z,
TR1	19410	88.54	859.382	859.378	3	5.50769	Q9BYW2	SETD2_HUMAN	Histone-lysine N-methyltransferase SETD2	412	421	GSRTNLSYSR	G1dEN5GlcNAc	416	N2H6F0S0	01Y41Y41M(31M)61M(31M21M)61M	Mannose	48.61	2	N,0;	4	iI2-3-X15/C,iI2-3-X35/B,iI2-3-X45/C,iI2-3-B/Y,C/Z,
TR1	19410	88.54	859.382	859.378	3	5.50769	Q9BYW2	SETD2_HUMAN	Histone-lysine N-methyltransferase SETD2	412	421	GSRTNLSYSR	G1dEN5GlcNAc	416	N2H6F0S0	01Y41Y41M(31M21M)61M(31M)61M	Mannose	48.61	2	N,0;	1	iI2-3-B/Y,C/Z,
TR1	19410	88.54	859.712	859.717	3	-5.87479	Q9Y6F6	MRVI1_HUMAN	Protein MRVI1	555	563	NLTEENTEK	N1GlcNAc@dEK9dE	555	N2H6F0S0	01Y41Y41M(31M)61M(31M21M)61M	Mannose	47.21	1	N,0;	4	iI2-3-X15/C,iI2-3-X35/B,iI2-3-X45/C,iI2-3-B/Y,C/Z,
TR1	19410	88.54	859.712	859.717	3	-5.87479	Q9Y6F6	MRVI1_HUMAN	Protein MRVI1	555	563	NLTEENTEK	N1GlcNAc@dEK9dE	555	N2H6F0S0	01Y41Y41M(31M21M)61M(31M)61M	Mannose	45.15	1	N,0;	1	iI2-3-B/Y,C/Z,
TR1	19410	88.54	859.712	859.715	3	-3.60195	P10646	TFPI1_HUMAN	Tissue factor pathway inhibitor	141	148	YFYNNQTK	Y1dEN5GlcNAcK8dE	145	N2H6F0S0	01Y41Y41M(31M)61M(31M21M)61M	Mannose	42.29	2	N,1;	4	iI2-3-X15/C,iI2-3-X35/B,iI2-3-X45/C,iI2-3-B/Y,C/Z,
TR1	19410	88.54	859.712	859.715	3	-3.60195	P10646	TFPI1_HUMAN	Tissue factor pathway inhibitor	141	148	YFYNNQTK	Y1dEN5GlcNAcK8dE	145	N2H6F0S0	01Y41Y41M(31M21M)61M(31M)61M	Mannose	42.29	2	N,1;	1	iI2-3-B/Y,C/Z,
TR1	19426	88.62	1064.13	1064.14	3	-5.02224	Q9C0D6	FHDC1_HUMAN	FH2 domain-containing protein 1	893	904	TLTASENESMRK	T1dEN7GlcNAcK12dE	899	N2H8F0S0	01Y41Y41M(31M21M)61M(31M21M)61M21M	Mannose	81.55	1	N,1;	1	iI2-3-B/Y,C/Z,
TR1	19426	88.62	1064.13	1064.14	3	-5.02224	Q9C0D6	FHDC1_HUMAN	FH2 domain-containing protein 1	893	904	TLTASENESMRK	T1dEN7GlcNAcK12dE	899	N2H8F0S0	01Y41Y41M(31M21M21M)61M(31M21M)61M	Mannose	79.14	1	N,1;	0
TR1	19436	88.67	968.42	968.416	3	3.8413	P35590	TIE1_HUMAN	Tyrosine-protein kinase receptor Tie-1	594	603	RENVSSPQAR	R1dEN3GlcNAc	596	N2H8F0S0	01Y41Y41M(31M21M21M)61M(31M21M)61M	Mannose	209.51	2	N,0;	0
TR1	19436	88.67	968.42	968.416	3	3.8413	P35590	TIE1_HUMAN	Tyrosine-protein kinase receptor Tie-1	594	603	RENVSSPQAR	R1dEN3GlcNAc	596	N2H8F0S0	01Y41Y41M(31M21M21M31G)61M(31M)61M	Mannose	209.51	2	N,0;	0
TR1	19436	88.67	968.42	968.419	3	1.32895	P14625	ENPL_HUMAN	Endoplasmin	494	503	LGVIEDHSNR	L1dEN9GlcNAc	502	N2H8F0S0	01Y41Y41M(31M21M)61M(31M21M)61M21M	Mannose	201.92	1	N,6;	1	iI2-3-B/Y,C/Z,
TR1	19436	88.67	968.42	968.416	3	3.8413	P35590	TIE1_HUMAN	Tyrosine-protein kinase receptor Tie-1	594	603	RENVSSPQAR	R1dEN3GlcNAc	596	N2H8F0S0	01Y41Y41M(31M21M)61M(31M21M)61M21M	Mannose	201.41	1	N,0;	1	iI2-3-B/Y,C/Z,
TR1	19436	88.67	968.42	968.42	3	-0.0124115	O15440	MRP5_HUMAN	Multidrug resistance-associated protein 5	682	692	GANLSGGQRQR	G1dEN3GlcNAc	684	N2H8F0S0	01Y41Y41M(31M21M)61M(31M21M)61M21M	Mannose	171.66	1	N,1;	1	iI2-3-B/Y,C/Z,
TR3	19546	88.77	940.744	940.75	3	-6.47217	Q5JNZ5	RS26L_HUMAN	Putative 40S ribosomal protein S26-like 1	6	12	RNNSHAK	R1dEN2GlcNAcK7dE	7	N3H6F0S1	01Y41Y41M(31M41Y41L32S)61M(31M)61M	Hybrid	43.2	1	N,1;	8	02AIII2,BIII2,BIII1,iI3-3-X25/B,14AIII3,35AIII4,BIII3,iI4III6Y,iII4III6Y,YIII5,
TR3	19554	88.81	856.061	856.059	3	1.58865	Q02809	PLOD1_HUMAN	Procollagen-lysine,2-oxoglutarate 5-dioxygenase 1	534	541	YIHQNYTK	Y1dEN5GlcNAcK8dE	538	N2H6F0S0	01Y41Y41M(31M)61M(31M21M)61M	Mannose	55.32	1	N,3;	4	iI2-3-X15/C,iI2-3-X35/B,iI2-3-X45/C,iI2-3-B/Y,C/Z,
TR3	19554	88.81	856.061	856.058	3	3.175	Q9NVV4	PAPD1_HUMAN	Poly(A) RNA polymerase, mitochondrial	563	571	GNRTENFTK	G1dEN2GlcNAcK9dE	564	N2H6F0S0	01Y41Y41M(31M)61M(31M21M)61M	Mannose	52.95	1	N,1;	4	iI2-3-X15/C,iI2-3-X35/B,iI2-3-X45/C,iI2-3-B/Y,C/Z,
TR3	19554	88.81	856.061	856.058	3	3.175	Q9NVV4	PAPD1_HUMAN	Poly(A) RNA polymerase, mitochondrial	563	571	GNRTENFTK	G1dEN6GlcNAcK9dE	568	N2H6F0S0	01Y41Y41M(31M)61M(31M21M)61M	Mannose	52.95	1	N,0;	4	iI2-3-X15/C,iI2-3-X35/B,iI2-3-X45/C,iI2-3-B/Y,C/Z,
TR3	19554	88.81	856.061	856.059	3	1.58865	Q02809	PLOD1_HUMAN	Procollagen-lysine,2-oxoglutarate 5-dioxygenase 1	534	541	YIHQNYTK	Y1dEN5GlcNAcK8dE	538	N2H6F0S0	01Y41Y41M(31M21M)61M(31M)61M	Mannose	48.95	1	N,3;	0
TR3	19554	88.81	856.061	856.058	3	3.175	Q9NVV4	PAPD1_HUMAN	Poly(A) RNA polymerase, mitochondrial	563	571	GNRTENFTK	G1dEN2GlcNAcK9dE	564	N2H6F0S0	01Y41Y41M(31M21M)61M(31M)61M	Mannose	46.58	1	N,1;	0
TR3	19554	88.81	856.061	856.058	3	3.175	Q9NVV4	PAPD1_HUMAN	Poly(A) RNA polymerase, mitochondrial	563	571	GNRTENFTK	G1dEN6GlcNAcK9dE	568	N2H6F0S0	01Y41Y41M(31M21M)61M(31M)61M	Mannose	46.58	1	N,0;	0
TR2	19470	88.88	1329.56	1329.56	2	2.48537	Q9NZ20	PA2G3_HUMAN	Group 3 secretory phospholipase A2	277	286	TFYNASWSSR	T1dEN4GlcNAc	280	N2H6F0S0	01Y41Y41M(31M21M)61M(31M)61M	Mannose	79.13	1	N,0;	1	iI2-3-B/Y,C/Z,
TR2	19470	88.88	1329.56	1329.56	2	0.281625	O94818	NOL4_HUMAN	Nucleolar protein 4	397	407	VNETDGVEAER	V1dEN2GlcNAc	398	N2H6F0S0	01Y41Y41M(31M21M)61M(31M)61M	Mannose	78.41	1	N,1;	1	iI2-3-B/Y,C/Z,
TR2	19470	88.88	1329.56	1329.56	2	2.48537	Q9NZ20	PA2G3_HUMAN	Group 3 secretory phospholipase A2	277	286	TFYNASWSSR	T1dEN4GlcNAc	280	N2H6F0S0	01Y41Y41M(31M)61M(31M21M)61M	Mannose	76.58	1	N,0;	1	iI2-3-B/Y,C/Z,
TR2	19470	88.88	1329.56	1329.56	2	0.281625	O94818	NOL4_HUMAN	Nucleolar protein 4	397	407	VNETDGVEAER	V1dEN2GlcNAc	398	N2H6F0S0	01Y41Y41M(31M)61M(31M21M)61M	Mannose	75.83	1	N,1;	1	iI2-3-B/Y,C/Z,
TR2	19488	88.97	953.73	953.729	3	1.40999	O60637	TSN3_HUMAN	Tetraspanin-3	167	176	NQSVPLSCCR	N1GlcNAc@dEC8CamC9Cam	167	N3H6F0S0	01Y41Y41M(31M41Y41L)61M(31M)61M	Hybrid	95.46	1	N,0;	15	BI1,BII1,BIII1,BI2,iIII3-3-B/Y,C/Z,BIII2,BIII3,02XI1,iI3-3-B/Y,C/Z,YI1,YI2,iI3III3Y,iII3III3Y,iI3III4Y,iII3III4Y,iI4III3Y,iII4III3Y,iI4III4Y,iII4III4Y,YIII3,YIII4,YI1,
TR2	19504	89.05	1024.45	1024.45	3	2.37887	Q8TD23	ZN675_HUMAN	Zinc finger protein 675	544	553	AFNQSANLTK	A1dEN3GlcNAcK10dE	546	N2H9F0S0	01Y41Y41M(31M21M21M31G)61M(31M21M)61M	Mannose	144.99	1	N,1;	0
TR2	19504	89.05	1024.45	1024.45	3	2.37887	Q8TD23	ZN675_HUMAN	Zinc finger protein 675	544	553	AFNQSANLTK	A1dEN7GlcNAcK10dE	550	N2H9F0S0	01Y41Y41M(31M21M21M31G)61M(31M21M)61M	Mannose	144.99	1	N,0;	0
TR2	19504	89.05	1024.45	1024.45	3	2.37887	Q9UBQ7	GRHPR_HUMAN	Glyoxylate reductase/hydroxypyruvate reductase	236	245	ETAVFINISR	E1dEN7GlcNAc	242	N2H9F0S0	01Y41Y41M(31M21M21M31G)61M(31M21M)61M	Mannose	144.99	1	N,0;	0
TR2	19504	89.05	1024.45	1024.45	3	2.37887	Q8TD23	ZN675_HUMAN	Zinc finger protein 675	544	553	AFNQSANLTK	A1dEN3GlcNAcK10dE	546	N2H9F0S0	01Y41Y41M(31M21M21M)61M(31M21M)61M21M	Mannose	142.45	1	N,1;	0
TR2	19504	89.05	1024.45	1024.45	3	2.37887	Q8TD23	ZN675_HUMAN	Zinc finger protein 675	544	553	AFNQSANLTK	A1dEN7GlcNAcK10dE	550	N2H9F0S0	01Y41Y41M(31M21M21M)61M(31M21M)61M21M	Mannose	142.45	1	N,0;	0
TR2	19504	89.05	1024.45	1024.45	3	2.37887	Q9UBQ7	GRHPR_HUMAN	Glyoxylate reductase/hydroxypyruvate reductase	236	245	ETAVFINISR	E1dEN7GlcNAc	242	N2H9F0S0	01Y41Y41M(31M21M21M)61M(31M21M)61M21M	Mannose	142.45	1	N,0;	0
TR2	19504	89.05	1024.78	1024.78	3	-2.39458	Q9BSK4	FEM1A_HUMAN	Protein fem-1 homolog A	112	121	TTRTNSTPLR	T1dEN5GlcNAc	116	N2H9F0S0	01Y41Y41M(31M21M21M31G)61M(31M21M)61M	Mannose	126.19	1	N,0;	0
TR2	19504	89.05	1024.78	1024.78	3	-2.39458	Q9BSK4	FEM1A_HUMAN	Protein fem-1 homolog A	112	121	TTRTNSTPLR	T1dEN5GlcNAc	116	N2H9F0S0	01Y41Y41M(31M21M21M)61M(31M21M)61M21M	Mannose	123.7	1	N,0;	0
TR2	19504	89.05	1024.78	1024.78	3	2.10296	Q9GZY6	NTAL_HUMAN	Linker for activation of T-cells family member 2	95	103	YQNFSKGSR	Y1dEN3GlcNAcK6dE	97	N2H9F0S0	01Y41Y41M(31M21M21M31G)61M(31M21M)61M	Mannose	120.13	1	N,0;	0
TR2	19504	89.05	1024.78	1024.78	3	2.10296	Q9GZY6	NTAL_HUMAN	Linker for activation of T-cells family member 2	95	103	YQNFSKGSR	Y1dEN3GlcNAcK6dE	97	N2H9F0S0	01Y41Y41M(31M21M21M)61M(31M21M)61M21M	Mannose	117.65	1	N,0;	0
TR2	19504	89.05	1025.12	1025.11	3	4.98726	Q8NA19	LMBL4_HUMAN	Lethal(3)malignant brain tumor-like protein 4	181	190	NRSPNGPMSK	N1GlcNAc@dEK10dE	181	N2H9F0S0	01Y41Y41M(31M21M21M31G)61M(31M21M)61M	Mannose	113.19	1	N,0;	0
TR2	19504	89.05	1025.12	1025.11	3	4.98726	Q8NA19	LMBL4_HUMAN	Lethal(3)malignant brain tumor-like protein 4	181	190	NRSPNGPMSK	N1GlcNAc@dEK10dE	181	N2H9F0S0	01Y41Y41M(31M21M21M)61M(31M21M)61M21M	Mannose	110.78	1	N,0;	0
TR2	19504	89.05	1025.12	1025.11	3	2.84602	P30419	NMT1_HUMAN	Glycylpeptide N-tetradecanoyltransferase 1	44	55	GGLSPANDTGAK	G1dEN7GlcNAcK12dE	50	N2H9F0S0	01Y41Y41M(31M21M21M31G)61M(31M21M)61M	Mannose	104.77	1	N,1;	0
TR2	19504	89.05	1025.12	1025.11	3	2.84602	P30419	NMT1_HUMAN	Glycylpeptide N-tetradecanoyltransferase 1	44	55	GGLSPANDTGAK	G1dEN7GlcNAcK12dE	50	N2H9F0S0	01Y41Y41M(31M21M21M)61M(31M21M)61M21M	Mannose	102.35	1	N,1;	0
TR1	19513	89.05	860.386	860.381	3	5.96887	P35590	TIE1_HUMAN	Tyrosine-protein kinase receptor Tie-1	594	603	RENVSSPQAR	R1dEN3GlcNAc	596	N2H6F0S0	01Y41Y41M(31M)61M(31M21M)61M	Mannose	54.97	1	N,1;	5	iI2-3-X15/C,iI2-3-X35/B,iI2-3-X45/C,iI2-3-X35/B,iI2-3-B/Y,C/Z,
TR1	19513	89.05	860.386	860.382	3	4.88214	Q9Y263	PLAP_HUMAN	Phospholipase A-2-activating protein	557	566	ELNGTAPEEK	E1dEN3GlcNAcK10dE	559	N2H6F0S0	01Y41Y41M(31M)61M(31M21M)61M	Mannose	52.61	1	N,2;	5	iI2-3-X15/C,iI2-3-X35/B,iI2-3-X45/C,iI2-3-X35/B,iI2-3-B/Y,C/Z,
TR1	19513	89.05	860.386	860.386	3	0.544528	P30419	NMT1_HUMAN	Glycylpeptide N-tetradecanoyltransferase 1	44	55	GGLSPANDTGAK	G1dEN7GlcNAcK12dE	50	N2H6F0S0	01Y41Y41M(31M21M)61M(31M)61M	Mannose	52.43	1	N,1;	1	iI2-3-A34/Y,
TR1	19513	89.05	860.386	860.381	3	5.96887	P35590	TIE1_HUMAN	Tyrosine-protein kinase receptor Tie-1	594	603	RENVSSPQAR	R1dEN3GlcNAc	596	N2H6F0S0	01Y41Y41M(31M21M)61M(31M)61M	Mannose	50.51	1	N,1;	1	iI2-3-A34/Y,
TR1	19513	89.05	860.386	860.382	3	4.88214	Q9Y263	PLAP_HUMAN	Phospholipase A-2-activating protein	557	566	ELNGTAPEEK	E1dEN3GlcNAcK10dE	559	N2H6F0S0	01Y41Y41M(31M21M)61M(31M)61M	Mannose	48.15	1	N,2;	1	iI2-3-A34/Y,
TR1	19524	89.11	1249.52	1249.51	2	3.75686	P38571	LICH_HUMAN	Lysosomal acid lipase/cholesteryl ester hydrolase	271	276	NLNMSR	N1dEN3GlcNAc	273	N2H8F0S0	01Y41Y41M(31M21M)61M(31M21M)61M21M	Mannose	133.8	1	N,1;	1	iI2-3-B/Y,C/Z,
TR1	19524	89.11	1249.52	1249.51	2	3.75686	P38571	LICH_HUMAN	Lysosomal acid lipase/cholesteryl ester hydrolase	271	276	NLNMSR	N1dEN3GlcNAc	273	N2H8F0S0	01Y41Y41M(31M21M21M)61M(31M21M)61M	Mannose	131.11	1	N,1;	0
TR2	19551	89.28	970.432	970.43	3	2.27412	Q02246	CNTN2_HUMAN	Contactin-2	631	640	GFDNHSPIAK	G1dEN4GlcNAcK10dE	634	N2H8F0S0	01Y41Y41M(31M21M)61M(31M21M)61M21M	Mannose	84.59	1	N,1;	0
TR2	19551	89.28	970.432	970.43	3	2.27412	Q02246	CNTN2_HUMAN	Contactin-2	631	640	GFDNHSPIAK	G1dEN4GlcNAcK10dE	634	N2H8F0S0	01Y41Y41M(31M21M21M)61M(31M21M)61M	Mannose	82.25	1	N,1;	0
TR2	19551	89.28	971.1	971.094	3	5.99196	Q8NA19	LMBL4_HUMAN	Lethal(3)malignant brain tumor-like protein 4	181	190	NRSPNGPMSK	N1GlcNAc@dEK10dE	181	N2H8F0S0	01Y41Y41M(31M21M21M31G)61M(31M)61M	Mannose	57.98	1	N,0;	0
TR2	19551	89.28	971.1	971.094	3	5.99196	Q8NA19	LMBL4_HUMAN	Lethal(3)malignant brain tumor-like protein 4	181	190	NRSPNGPMSK	N1GlcNAc@dEK10dE	181	N2H8F0S0	01Y41Y41M(31M21M21M)61M(31M21M)61M	Mannose	53.7	1	N,0;	0
TR1	19562	89.29	1025.44	1025.44	3	1.31324	Q6ZN57	ZFP2_HUMAN	Zinc finger protein 2 homolog	446	455	AFSRSTNLTR	A1dEN7GlcNAc	452	N2H9F0S0	01Y41Y41M(31M21M21M)61M(31M21M)61M21M	Mannose	113.76	1	N,1;	0
TR1	19562	89.29	1025.44	1025.44	3	1.31324	Q6ZN57	ZFP2_HUMAN	Zinc finger protein 2 homolog	446	455	AFSRSTNLTR	A1dEN7GlcNAc	452	N2H9F0S0	01Y41Y41M(31M21M21M31G31G)61M(31M)61M	Mannose	86.9	1	N,1;	0
TR2	19554	89.3	913.399	913.395	3	4.14036	P08962	CD63_HUMAN	CD63 antigen	129	138	NNHTASILDR	N1dEN2GlcNAc	130	N2H7F0S0	01Y41Y41M(31M)61M(31M21M)61M21M	Mannose	79.82	1	N,0;	5	iI2-3-X15/C,iI2-3-X35/B,iI2-3-X45/C,iI2-3-X25/B,iI2-3-B/Y,C/Z,
TR2	19554	89.3	913.399	913.395	3	4.14036	P08962	CD63_HUMAN	CD63 antigen	129	138	NNHTASILDR	N1dEN2GlcNAc	130	N2H7F0S0	01Y41Y41M(31M21M)61M(31M21M)61M	Mannose	68.47	1	N,0;	0
TR3	19669	89.38	994.07	994.071	3	-1.22494	O60637	TSN3_HUMAN	Tetraspanin-3	167	176	NQSVPLSCCR	N1GlcNAc@dEC8CamC9Cam	167	N2H8F0S0	01Y41Y41M(31M21M21M)61M(31M21M)61M	Mannose	134.62	1	N,0;	0
TR3	19669	89.38	994.07	994.071	3	-1.22494	O60637	TSN3_HUMAN	Tetraspanin-3	167	176	NQSVPLSCCR	N1GlcNAc@dEC8CamC9Cam	167	N2H8F0S0	01Y41Y41M(31M21M)61M(31M21M)61M21M	Mannose	132.29	1	N,0;	1	iI2-3-B/Y,C/Z,
TR2	19579	89.42	1022.44	1022.44	3	2.41757	P14625	ENPL_HUMAN	Endoplasmin	494	503	LGVIEDHSNR	L1dEN9GlcNAc	502	N2H9F0S0	01Y41Y41M(31M21M21M)61M(31M21M)61M21M	Mannose	201.3	1	N,3;	0
TR2	19579	89.42	1022.44	1022.44	3	2.41757	P14625	ENPL_HUMAN	Endoplasmin	494	503	LGVIEDHSNR	L1dEN9GlcNAc	502	N2H9F0S0	01Y41Y41M(31M21M21M31G)61M(31M21M)61M	Mannose	193.44	1	N,3;	0
TR2	19579	89.42	1022.44	1022.44	3	1.14707	O15440	MRP5_HUMAN	Multidrug resistance-associated protein 5	682	692	GANLSGGQRQR	G1dEN3GlcNAc	684	N2H9F0S0	01Y41Y41M(31M21M21M)61M(31M21M)61M21M	Mannose	173.99	1	N,1;	0
TR3	19682	89.44	940.056	940.054	3	2.50862	O60637	TSN3_HUMAN	Tetraspanin-3	167	176	NQSVPLSCCR	N1GlcNAc@dEC8CamC9Cam	167	N2H7F0S0	01Y41Y41M(31M21M21M)61M(31M)61M	Mannose	147.67	1	N,0;	1	iI2-3-B/Y,C/Z,iIII2-3-B/Y,C/Z,
TR3	19682	89.44	940.056	940.054	3	2.50862	O60637	TSN3_HUMAN	Tetraspanin-3	167	176	NQSVPLSCCR	N1GlcNAc@dEC8CamC9Cam	167	N2H7F0S0	01Y41Y41M(31M21M)61M(31M21M)61M	Mannose	140.9	1	N,0;	1	iI2-3-B/Y,C/Z,
TR3	19682	89.44	940.056	940.06	3	-3.79631	Q8WZ42	TITIN_HUMAN	Titin	5048	5058	NVDSVVNGTCR	N1dEN7GlcNAcC10Cam	5054	N2H7F0S0	01Y41Y41M(31M21M)61M(31M21M)61M	Mannose	80.31	1	N,0;	1	iI2-3-B/Y,C/Z,
TR3	19682	89.44	940.056	940.06	3	-3.79631	Q8WZ42	TITIN_HUMAN	Titin	5048	5058	NVDSVVNGTCR	N1dEN7GlcNAcC10Cam	5054	N2H7F0S0	01Y41Y41M(31M21M21M)61M(31M)61M	Mannose	68.76	1	N,0;	1	iI2-3-B/Y,C/Z,iIII2-3-B/Y,C/Z,
TR3	19682	89.44	940.725	940.728	3	-2.45682	O94818	NOL4_HUMAN	Nucleolar protein 4	397	407	VNETDGVEAER	V1dEN2GlcNAc	398	N2H7F0S0	01Y41Y41M(31M21M21M)61M(31M)61M	Mannose	40.02	1	N,2;	1	iI2-3-B/Y,C/Z,iIII2-3-B/Y,C/Z,
TR2	19637	89.71	914.403	914.401	3	2.44683	P14625	ENPL_HUMAN	Endoplasmin	494	503	LGVIEDHSNR	L1dEN9GlcNAc	502	N2H7F0S0	01Y41Y41M(31M21M21M)61M(31M)61M	Mannose	70.17	1	N,2;	0
TR2	19637	89.71	914.403	914.403	3	1.02732	O15440	MRP5_HUMAN	Multidrug resistance-associated protein 5	682	692	GANLSGGQRQR	G1dEN3GlcNAc	684	N2H7F0S0	01Y41Y41M(31M)61M(31M21M)61M21M	Mannose	69.75	1	N,2;	4	iI2-3-X15/C,iI2-3-X35/B,iI2-3-X45/C,iI2-3-B/Y,C/Z,
TR2	19637	89.71	914.403	914.407	3	-3.83595	P35414	APJ_HUMAN	Apelin receptor	169	178	TTGDLENTTK	T1dEN7GlcNAcK10dE	175	N2H7F0S0	01Y41Y41M(31M)61M(31M21M)61M21M	Mannose	65.3	1	N,1;	4	iI2-3-X15/C,iI2-3-X35/B,iI2-3-X45/C,iI2-3-B/Y,C/Z,
TR2	19637	89.71	914.403	914.403	3	1.02732	O15440	MRP5_HUMAN	Multidrug resistance-associated protein 5	682	692	GANLSGGQRQR	G1dEN3GlcNAc	684	N2H7F0S0	01Y41Y41M(31M21M21M)61M(31M)61M	Mannose	65.11	1	N,2;	0
TR2	19637	89.71	914.403	914.407	3	-3.83595	P35414	APJ_HUMAN	Apelin receptor	169	178	TTGDLENTTK	T1dEN7GlcNAcK10dE	175	N2H7F0S0	01Y41Y41M(31M21M21M)61M(31M)61M	Mannose	60.7	1	N,1;	0
TR1	19655	89.74	1332.1	1332.1	2	-5.90287	Q6P2P2	ANM9_HUMAN	Protein arginine N-methyltransferase 9	837	844	SNVSITVK	S1dEN2GlcNAcK8dE	838	N2H8F0S0	01Y41Y41M(31M21M)61M(31M21M)61M21M	Mannose	114.33	1	N,0;	1	iI2-3-B/Y,C/Z,
TR1	19655	89.74	1332.1	1332.1	2	-5.90287	Q6P2P2	ANM9_HUMAN	Protein arginine N-methyltransferase 9	837	844	SNVSITVK	S1dEN2GlcNAcK8dE	838	N2H8F0S0	01Y41Y41M(31M21M21M)61M(31M21M)61M	Mannose	111.69	1	N,0;	0
TR2	19652	89.78	968.419	968.42	3	-0.894768	O15440	MRP5_HUMAN	Multidrug resistance-associated protein 5	682	692	GANLSGGQRQR	G1dEN3GlcNAc	684	N2H8F0S0	01Y41Y41M(31M21M21M31G)61M(31M)61M	Mannose	184.39	1	N,1;	0
TR3	19807	90.06	1024.45	1024.45	3	5.75446	Q02246	CNTN2_HUMAN	Contactin-2	631	640	GFDNHSPIAK	G1dEN4GlcNAcK10dE	634	N2H9F0S0	01Y41Y41M(31M21M21M31G)61M(31M21M)61M	Mannose	134.16	1	N,1;	0
TR3	19807	90.06	1024.45	1024.45	3	5.75446	Q02246	CNTN2_HUMAN	Contactin-2	631	640	GFDNHSPIAK	G1dEN4GlcNAcK10dE	634	N2H9F0S0	01Y41Y41M(31M21M21M)61M(31M21M)61M21M	Mannose	131.58	1	N,1;	0
TR3	19829	90.17	1078.47	1078.46	3	4.15345	Q8TD23	ZN675_HUMAN	Zinc finger protein 675	544	553	AFNQSANLTK	A1dEN3GlcNAcK10dE	546	N2H10F0S0	01Y41Y41M(31M21M21M31G)61M(31M21M)61M21M	Mannose	144.67	1	N,1;	0
TR3	19829	90.17	1078.47	1078.46	3	4.15345	Q8TD23	ZN675_HUMAN	Zinc finger protein 675	544	553	AFNQSANLTK	A1dEN7GlcNAcK10dE	550	N2H10F0S0	01Y41Y41M(31M21M21M31G)61M(31M21M)61M21M	Mannose	144.67	1	N,1;	0
TR3	19829	90.17	1078.47	1078.46	3	4.15345	Q8TD23	ZN675_HUMAN	Zinc finger protein 675	544	553	AFNQSANLTK	A1dEN3GlcNAcK10dE	546	N2H10F0S0	01Y41Y41M(31M21M21M31G31G)61M(31M21M)61M	Mannose	139.58	1	N,1;	1	iI3-3-X25/C,
TR3	19829	90.17	1078.47	1078.46	3	4.15345	Q8TD23	ZN675_HUMAN	Zinc finger protein 675	544	553	AFNQSANLTK	A1dEN7GlcNAcK10dE	550	N2H10F0S0	01Y41Y41M(31M21M21M31G31G)61M(31M21M)61M	Mannose	139.58	1	N,1;	1	iI3-3-X25/C,
TR3	19829	90.17	1078.8	1078.8	3	-2.87278	Q9BSK4	FEM1A_HUMAN	Protein fem-1 homolog A	112	121	TTRTNSTPLR	T1dEN5GlcNAc	116	N2H10F0S0	01Y41Y41M(31M21M21M31G)61M(31M21M)61M21M	Mannose	136.41	1	N,0;	0
TR3	19829	90.17	1078.8	1078.8	3	-2.87278	Q9BSK4	FEM1A_HUMAN	Protein fem-1 homolog A	112	121	TTRTNSTPLR	T1dEN5GlcNAc	116	N2H10F0S0	01Y41Y41M(31M21M21M31G31G)61M(31M21M)61M	Mannose	131.38	1	N,0;	1	iI3-3-X25/C,
TR3	19829	90.17	1079.14	1079.13	3	5.94868	Q8NA19	LMBL4_HUMAN	Lethal(3)malignant brain tumor-like protein 4	181	190	NRSPNGPMSK	N1GlcNAc@dEK10dE	181	N2H10F0S0	01Y41Y41M(31M21M21M31G31G)61M(31M21M)61M	Mannose	100.14	2	N,0;	1	iI3-3-X25/C,
TR3	19829	90.17	1079.14	1079.13	3	5.94868	Q8NA19	LMBL4_HUMAN	Lethal(3)malignant brain tumor-like protein 4	181	190	NRSPNGPMSK	N1GlcNAc@dEK10dE	181	N2H10F0S0	01Y41Y41M(31M21M21M31G31G21G)61M(31M)61M	Mannose	100.14	2	N,0;	0
TR3	19829	90.17	1079.14	1079.13	3	5.94868	Q8NA19	LMBL4_HUMAN	Lethal(3)malignant brain tumor-like protein 4	181	190	NRSPNGPMSK	N1GlcNAc@dEK10dE	181	N2H10F0S0	01Y41Y41M(31M21M21M31G)61M(31M21M)61M21M	Mannose	93.18	1	N,0;	0
TR2	19734	90.19	860.389	860.384	3	6.47404	P14625	ENPL_HUMAN	Endoplasmin	494	503	LGVIEDHSNR	L1dEN9GlcNAc	502	N2H6F0S0	01Y41Y41M(31M)61M(31M21M)61M	Mannose	73.72	1	N,2;	4	iI2-3-X15/C,iI2-3-X35/B,iI2-3-X45/C,iI2-3-B/Y,C/Z,
TR2	19733	90.19	787.623	787.622	4	0.809562	P08236	BGLR_HUMAN	Beta-glucuronidase	629	641	IANETRYPHSVAK	I1dEN3GlcNAcK13dE	631	N2H7F0S0	01Y41Y41M(31M21M)61M(31M21M)61M	Mannose	67.43	1	N,1;	1	iI2-3-A25/Z,
TR2	19734	90.19	860.389	860.386	3	3.87867	P30419	NMT1_HUMAN	Glycylpeptide N-tetradecanoyltransferase 1	44	55	GGLSPANDTGAK	G1dEN7GlcNAcK12dE	50	N2H6F0S0	01Y41Y41M(31M)61M(31M21M)61M	Mannose	65.83	1	N,0;	4	iI2-3-X15/C,iI2-3-X35/B,iI2-3-X45/C,iI2-3-B/Y,C/Z,
TR2	19733	90.19	787.623	787.622	4	0.809562	P08236	BGLR_HUMAN	Beta-glucuronidase	629	641	IANETRYPHSVAK	I1dEN3GlcNAcK13dE	631	N2H7F0S0	01Y41Y41M(31M)61M(31M21M)61M21M	Mannose	63.14	1	N,1;	3	iI2-3-X15/C,iI2-3-X35/B,iI2-3-X45/C,
TR2	19734	90.19	860.389	860.384	3	6.47404	P14625	ENPL_HUMAN	Endoplasmin	494	503	LGVIEDHSNR	L1dEN9GlcNAc	502	N2H6F0S0	01Y41Y41M(31M21M)61M(31M)61M	Mannose	62.63	1	N,2;	1	iI2-3-B/Y,C/Z,
TR2	19734	90.19	860.389	860.389	3	-0.204377	P35414	APJ_HUMAN	Apelin receptor	169	178	TTGDLENTTK	T1dEN7GlcNAcK10dE	175	N2H6F0S0	01Y41Y41M(31M)61M(31M21M)61M	Mannose	57.16	1	N,1;	4	iI2-3-X15/C,iI2-3-X35/B,iI2-3-X45/C,iI2-3-B/Y,C/Z,
TR2	19734	90.19	860.389	860.385	3	4.96656	O15440	MRP5_HUMAN	Multidrug resistance-associated protein 5	682	692	GANLSGGQRQR	G1dEN3GlcNAc	684	N2H6F0S0	01Y41Y41M(31M)61M(31M21M)61M	Mannose	57.02	1	N,3;	4	iI2-3-X15/C,iI2-3-X35/B,iI2-3-X45/C,iI2-3-B/Y,C/Z,
TR2	19734	90.19	860.389	860.389	3	-0.204377	P35414	APJ_HUMAN	Apelin receptor	169	178	TTGDLENTTK	T1dEN7GlcNAcK10dE	175	N2H6F0S0	01Y41Y41M(31M21M)61M(31M)61M	Mannose	46.15	1	N,1;	1	iI2-3-B/Y,C/Z,
TR1	19752	90.21	1072.81	1072.8	3	3.50594	Q95604	1C17_HUMAN	HLA class I histocompatibility antigen, Cw-17 alpha chain	107	121	GYYNQSEAGSHTIQR	G1dEN4GlcNAc	110	N4H3F1S0	01Y(61F)41Y41M(31M41Y)61M61Y	Complex	108.98	1	N,0;	0
TR1	19752	90.21	1072.81	1072.8	3	3.50594	P30501	1C02_HUMAN	HLA class I histocompatibility antigen, Cw-2 alpha chain	107	121	GYYNQSEAGSHTLQR	G1dEN4GlcNAc	110	N4H3F1S0	01Y(61F)41Y41M(31M41Y)61M61Y	Complex	108.98	1	N,0;	0
TR1	19752	90.21	1072.81	1072.8	3	3.50594	Q95604	1C17_HUMAN	HLA class I histocompatibility antigen, Cw-17 alpha chain	107	121	GYYNQSEAGSHTIQR	G1dEN4GlcNAc	110	N4H3F1S0	01Y41Y41M(31M41Y31F)61M61Y	Complex	108.97	1	N,0;	0
TR1	19752	90.21	1072.81	1072.8	3	3.50594	P30501	1C02_HUMAN	HLA class I histocompatibility antigen, Cw-2 alpha chain	107	121	GYYNQSEAGSHTLQR	G1dEN4GlcNAc	110	N4H3F1S0	01Y41Y41M(31M41Y31F)61M61Y	Complex	108.97	1	N,0;	0
TR2	19750	90.27	747.11	747.107	4	3.57665	Q9BXP2	S12A9_HUMAN	Solute carrier family 12 member 9	221	235	LTPRPGPNGSSLPPR	L1dEN8GlcNAc	228	N2H6F0S0	01Y41Y41M(31M21M)61M(31M)61M	Mannose	63.73	1	N,1;	3	iI2-3-A34/Y,iI2-3-A34/Z,iI2-3-A34/Y,
TR2	19750	90.27	747.11	747.107	4	3.57665	Q9BXP2	S12A9_HUMAN	Solute carrier family 12 member 9	221	235	LTPRPGPNGSSLPPR	L1dEN8GlcNAc	228	N2H6F0S0	01Y41Y41M(31M)61M(31M21M)61M	Mannose	59.38	1	N,1;	3	iI2-3-X15/C,iI2-3-X35/B,iI2-3-X45/C,
TR3	19855	90.3	887.424	887.423	3	0.659313	P50897	PPT1_HUMAN	Palmitoyl-protein thioesterase 1	210	217	GINESYKK	G1dEN3GlcNAcK7dEK8dE	212	N2H7F0S0	01Y41Y41M(31M21M)61M(31M21M)61M	Mannose	100.78	2	N,1;	1	iI2-3-B/Y,C/Z,
TR3	19855	90.3	887.424	887.423	3	0.659313	P50897	PPT1_HUMAN	Palmitoyl-protein thioesterase 1	210	217	GINESYKK	G1dEN3GlcNAcK7dEK8dE	212	N2H7F0S0	01Y41Y41M(31M21M21M)61M(31M)61M	Mannose	100.78	2	N,1;	0
TR3	19855	90.3	887.424	887.423	3	0.659313	P50897	PPT1_HUMAN	Palmitoyl-protein thioesterase 1	210	217	GINESYKK	G1dEN3GlcNAcK7dEK8dE	212	N2H7F0S0	01Y41Y41M(31M)61M(31M21M)61M21M	Mannose	98.58	1	N,1;	4	iI2-3-X15/C,iI2-3-X35/B,iI2-3-X45/C,iI2-3-B/Y,C/Z,
TR2	19758	90.32	995.812	995.809	3	2.44468	P08236	BGLR_HUMAN	Beta-glucuronidase	629	641	IANETRYPHSVAK	I1dEN3GlcNAcK13dE	631	N2H6F0S0	01Y41Y41M(31M21M)61M(31M)61M	Mannose	138.4	1	N,1;	1	iI2-3-B/Y,C/Z,
TR2	19758	90.32	995.812	995.809	3	2.44468	P08236	BGLR_HUMAN	Beta-glucuronidase	629	641	IANETRYPHSVAK	I1dEN3GlcNAcK13dE	631	N2H6F0S0	01Y41Y41M(31M)61M(31M21M)61M	Mannose	133.09	1	N,1;	4	iI2-3-X15/C,iI2-3-X35/B,iI2-3-X45/C,iI2-3-B/Y,C/Z,
TR1	19790	90.4	1158.82	1158.82	3	0.74355	Q95604	1C17_HUMAN	HLA class I histocompatibility antigen, Cw-17 alpha chain	107	121	GYYNQSEAGSHTIQR	G1dEN4GlcNAc	110	N2H8F0S0	01Y41Y41M(31M21M21M31G)61M(31M)61M	Mannose	332.84	1	N,1;	0
TR1	19790	90.4	1158.82	1158.82	3	0.74355	P30501	1C02_HUMAN	HLA class I histocompatibility antigen, Cw-2 alpha chain	107	121	GYYNQSEAGSHTLQR	G1dEN4GlcNAc	110	N2H8F0S0	01Y41Y41M(31M21M21M31G)61M(31M)61M	Mannose	332.84	1	N,1;	0
TR3	19921	90.63	914.397	914.4	3	-2.65329	Q9Y263	PLAP_HUMAN	Phospholipase A-2-activating protein	557	566	ELNGTAPEEK	E1dEN3GlcNAcK10dE	559	N2H7F0S0	01Y41Y41M(31M21M)61M(31M21M)61M	Mannose	70.79	1	N,1;	0
TR3	19921	90.63	914.397	914.403	3	-5.7143	O15440	MRP5_HUMAN	Multidrug resistance-associated protein 5	682	692	GANLSGGQRQR	G1dEN3GlcNAc	684	N2H7F0S0	01Y41Y41M(31M21M)61M(31M21M)61M	Mannose	63.61	1	N,3;	0
TR3	19921	90.63	914.397	914.4	3	-2.65329	Q9Y263	PLAP_HUMAN	Phospholipase A-2-activating protein	557	566	ELNGTAPEEK	E1dEN3GlcNAcK10dE	559	N2H7F0S0	01Y41Y41M(31M)61M(31M21M)61M21M	Mannose	59.61	1	N,1;	4	iI2-3-X15/C,iI2-3-X35/B,iI2-3-X45/C,iI2-3-B/Y,C/Z,
TR3	19943	90.74	968.42	968.419	3	1.26592	P14625	ENPL_HUMAN	Endoplasmin	494	503	LGVIEDHSNR	L1dEN9GlcNAc	502	N2H8F0S0	01Y41Y41M(31M21M21M)61M(31M21M)61M	Mannose	220.74	1	N,5;	0
TR3	19943	90.74	968.42	968.419	3	1.26592	P14625	ENPL_HUMAN	Endoplasmin	494	503	LGVIEDHSNR	L1dEN9GlcNAc	502	N2H8F0S0	01Y41Y41M(31M21M21M31G)61M(31M)61M	Mannose	218.1	1	N,5;	0
TR3	19943	90.74	968.42	968.42	3	-0.075437	O15440	MRP5_HUMAN	Multidrug resistance-associated protein 5	682	692	GANLSGGQRQR	G1dEN3GlcNAc	684	N2H8F0S0	01Y41Y41M(31M21M21M)61M(31M21M)61M	Mannose	185.53	1	N,1;	0
TR3	19943	90.74	968.42	968.422	3	-2.39777	Q8TAA1	RNS11_HUMAN	Probable ribonuclease 11	106	115	KVSEANGSCK	K1dEN6GlcNAcC9CamK10dE	111	N2H8F0S0	01Y41Y41M(31M21M21M)61M(31M21M)61M	Mannose	181.27	1	N,0;	0
TR3	19943	90.74	968.42	968.422	3	-2.39777	Q8TAA1	RNS11_HUMAN	Probable ribonuclease 11	106	115	KVSEANGSCK	K1dEN6GlcNAcC9CamK10dE	111	N2H8F0S0	01Y41Y41M(31M21M21M31G)61M(31M)61M	Mannose	178.63	1	N,0;	0
TR3	19943	90.74	968.42	968.425	3	-4.66537	P35414	APJ_HUMAN	Apelin receptor	169	178	TTGDLENTTK	T1dEN7GlcNAcK10dE	175	N2H8F0S0	01Y41Y41M(31M21M21M)61M(31M21M)61M	Mannose	144.88	2	N,0;	0
TR3	19943	90.74	968.42	968.425	3	-4.66537	P35414	APJ_HUMAN	Apelin receptor	169	178	TTGDLENTTK	T1dEN7GlcNAcK10dE	175	N2H8F0S0	01Y41Y41M(31M21M21M31G)61M(31M)61M	Mannose	144.88	2	N,0;	0
TR3	19943	90.74	968.42	968.425	3	-4.66537	P35414	APJ_HUMAN	Apelin receptor	169	178	TTGDLENTTK	T1dEN7GlcNAcK10dE	175	N2H8F0S0	01Y41Y41M(31M21M)61M(31M21M)61M21M	Mannose	137.25	1	N,0;	1	iI2-3-B/Y,C/Z,
TR3	19948	90.77	859.378	859.381	3	-2.98121	Q9NX02-2	NALP2_HUMAN	Isoform 2 of NACHT, LRR and PYD domains-containing protein 2	129	137	TEAQDKDNR	T1dEK6dEN8GlcNAc	136	N2H6F0S0	01Y41Y41M(31M)61M(31M21M)61M	Mannose	53.06	2	N,1;	4	iI2-3-X15/C,iI2-3-X35/B,iI2-3-X45/C,iI2-3-B/Y,C/Z,
TR3	19948	90.77	859.378	859.381	3	-2.98121	Q9NX02-2	NALP2_HUMAN	Isoform 2 of NACHT, LRR and PYD domains-containing protein 2	129	137	TEAQDKDNR	T1dEK6dEN8GlcNAc	136	N2H6F0S0	01Y41Y41M(31M21M)61M(31M)61M	Mannose	53.06	2	N,1;	0
TR2	19880	90.92	1180.84	1180.84	3	0.85015	Q95604	1C17_HUMAN	HLA class I histocompatibility antigen, Cw-17 alpha chain	107	121	GYYNQSEAGSHTIQR	G1dEN4GlcNAc	110	N4H5F1S0	01Y(61F)41Y41M(31M41Y41L)61M61Y41L	Complex	149.1	1	N,0;	0
TR2	19880	90.92	1180.84	1180.84	3	0.85015	P30501	1C02_HUMAN	HLA class I histocompatibility antigen, Cw-2 alpha chain	107	121	GYYNQSEAGSHTLQR	G1dEN4GlcNAc	110	N4H5F1S0	01Y(61F)41Y41M(31M41Y41L)61M61Y41L	Complex	149.1	1	N,0;	0
TR2	19880	90.92	1180.84	1180.84	3	0.85015	Q95604	1C17_HUMAN	HLA class I histocompatibility antigen, Cw-17 alpha chain	107	121	GYYNQSEAGSHTIQR	G1dEN4GlcNAc	110	N4H5F1S0	01Y41Y41M(31M41Y(31F)41L)61M61Y41L	Complex	134.62	1	N,0;	0
TR2	19880	90.92	1180.84	1180.84	3	0.85015	P30501	1C02_HUMAN	HLA class I histocompatibility antigen, Cw-2 alpha chain	107	121	GYYNQSEAGSHTLQR	G1dEN4GlcNAc	110	N4H5F1S0	01Y41Y41M(31M41Y(31F)41L)61M61Y41L	Complex	134.62	1	N,0;	0
TR1	19899	90.95	1276.87	1276.87	3	2.33096	Q95604	1C17_HUMAN	HLA class I histocompatibility antigen, Cw-17 alpha chain	107	121	GYYNQSEAGSHTIQR	G1dEN4GlcNAc	110	N4H5F1S1	01Y(61F)41Y41M(31M41Y41L)61M61Y41L32S	Complex	146.74	1	N,0;	1	iI3-4-X45/C,
TR1	19899	90.95	1276.87	1276.87	3	2.33096	P30501	1C02_HUMAN	HLA class I histocompatibility antigen, Cw-2 alpha chain	107	121	GYYNQSEAGSHTLQR	G1dEN4GlcNAc	110	N4H5F1S1	01Y(61F)41Y41M(31M41Y41L)61M61Y41L32S	Complex	146.74	1	N,0;	1	iI3-4-X45/C,
TR1	19899	90.95	1276.87	1276.87	3	2.33096	Q95604	1C17_HUMAN	HLA class I histocompatibility antigen, Cw-17 alpha chain	107	121	GYYNQSEAGSHTIQR	G1dEN4GlcNAc	110	N4H5F1S1	01Y(61F)41Y41M(31M)61M(21Y41L32S)61Y41L	Complex	141.01	1	N,0;	0
TR1	19899	90.95	1276.87	1276.87	3	2.33096	P30501	1C02_HUMAN	HLA class I histocompatibility antigen, Cw-2 alpha chain	107	121	GYYNQSEAGSHTLQR	G1dEN4GlcNAc	110	N4H5F1S1	01Y(61F)41Y41M(31M)61M(21Y41L32S)61Y41L	Complex	141.01	1	N,0;	0
TR3	19995	91	1103.85	1103.84	3	3.35778	P08236	BGLR_HUMAN	Beta-glucuronidase	629	641	IANETRYPHSVAK	I1dEN3GlcNAcK13dE	631	N2H8F0S0	01Y41Y41M(31M21M21M)61M(31M21M)61M	Mannose	185.32	1	N,0;	0
TR3	19995	91	1103.85	1103.84	3	3.35778	P08236	BGLR_HUMAN	Beta-glucuronidase	629	641	IANETRYPHSVAK	I1dEN3GlcNAcK13dE	631	N2H8F0S0	01Y41Y41M(31M21M)61M(31M21M)61M21M	Mannose	182.54	2	N,0;	0
TR3	19995	91	1103.85	1103.84	3	3.35778	P08236	BGLR_HUMAN	Beta-glucuronidase	629	641	IANETRYPHSVAK	I1dEN3GlcNAcK13dE	631	N2H8F0S0	01Y41Y41M(31M21M21M31G)61M(31M)61M	Mannose	182.54	2	N,0;	0
TR3	19997	91.01	914.399	914.401	3	-2.29233	P14625	ENPL_HUMAN	Endoplasmin	494	503	LGVIEDHSNR	L1dEN9GlcNAc	502	N2H7F0S0	01Y41Y41M(31M21M)61M(31M21M)61M	Mannose	79.17	1	N,3;	0
TR3	19997	91.01	914.399	914.401	3	-2.29233	P14625	ENPL_HUMAN	Endoplasmin	494	503	LGVIEDHSNR	L1dEN9GlcNAc	502	N2H7F0S0	01Y41Y41M(31M)61M(31M21M)61M21M	Mannose	76.85	1	N,3;	4	iI2-3-X15/C,iI2-3-X35/B,iI2-3-X45/C,iI2-3-B/Y,C/Z,
TR2	19911	91.07	1266.86	1266.85	3	3.99837	Q95604	1C17_HUMAN	HLA class I histocompatibility antigen, Cw-17 alpha chain	107	121	GYYNQSEAGSHTIQR	G1dEN4GlcNAc	110	N2H10F0S0	01Y41Y41M(31M21M21M31G)61M(31M21M)61M21M	Mannose	358.09	1	N,2;	0
TR2	19911	91.07	1266.86	1266.85	3	3.99837	P30501	1C02_HUMAN	HLA class I histocompatibility antigen, Cw-2 alpha chain	107	121	GYYNQSEAGSHTLQR	G1dEN4GlcNAc	110	N2H10F0S0	01Y41Y41M(31M21M21M31G)61M(31M21M)61M21M	Mannose	358.09	1	N,2;	0
TR2	19911	91.07	1266.86	1266.85	3	3.99837	Q95604	1C17_HUMAN	HLA class I histocompatibility antigen, Cw-17 alpha chain	107	121	GYYNQSEAGSHTIQR	G1dEN4GlcNAc	110	N2H10F0S0	01Y41Y41M(31M21M21M31G31G)61M(31M21M)61M	Mannose	350.04	1	N,2;	0
TR2	19911	91.07	1266.86	1266.85	3	3.99837	P30501	1C02_HUMAN	HLA class I histocompatibility antigen, Cw-2 alpha chain	107	121	GYYNQSEAGSHTLQR	G1dEN4GlcNAc	110	N2H10F0S0	01Y41Y41M(31M21M21M31G31G)61M(31M21M)61M	Mannose	350.04	1	N,2;	0
TR3	20021	91.13	1389.64	1389.64	2	1.92026	Q6YHK3	CD109_HUMAN	CD109 antigen	245	253	HLNGTITAK	H1dEN3GlcNAcK9dE	247	N2H8F0S0	01Y41Y41M(31M21M)61M(31M21M)61M21M	Mannose	127.69	1	N,2;	0
TR3	20021	91.13	1389.64	1389.64	2	1.92026	Q6YHK3	CD109_HUMAN	CD109 antigen	245	253	HLNGTITAK	H1dEN3GlcNAcK9dE	247	N2H8F0S0	01Y41Y41M(31M21M21M)61M(31M21M)61M	Mannose	124.99	1	N,2;	0
TR2	19929	91.15	1212.84	1212.84	3	-1.73389	Q95604	1C17_HUMAN	HLA class I histocompatibility antigen, Cw-17 alpha chain	107	121	GYYNQSEAGSHTIQR	G1dEN4GlcNAc	110	N2H9F0S0	01Y41Y41M(31M21M21M31G)61M(31M21M)61M	Mannose	336.21	1	N,2;	0
TR2	19929	91.15	1212.84	1212.84	3	-1.73389	P30501	1C02_HUMAN	HLA class I histocompatibility antigen, Cw-2 alpha chain	107	121	GYYNQSEAGSHTLQR	G1dEN4GlcNAc	110	N2H9F0S0	01Y41Y41M(31M21M21M31G)61M(31M21M)61M	Mannose	336.21	1	N,2;	0
TR2	19929	91.15	1212.84	1212.84	3	-1.73389	Q95604	1C17_HUMAN	HLA class I histocompatibility antigen, Cw-17 alpha chain	107	121	GYYNQSEAGSHTIQR	G1dEN4GlcNAc	110	N2H9F0S0	01Y41Y41M(31M21M21M)61M(31M21M)61M21M	Mannose	333.54	1	N,2;	0
TR2	19929	91.15	1212.84	1212.84	3	-1.73389	P30501	1C02_HUMAN	HLA class I histocompatibility antigen, Cw-2 alpha chain	107	121	GYYNQSEAGSHTLQR	G1dEN4GlcNAc	110	N2H9F0S0	01Y41Y41M(31M21M21M)61M(31M21M)61M21M	Mannose	333.54	1	N,2;	0
TR2	19929	91.15	1212.84	1212.84	3	-5.92816	P0CB38	PAB4L_HUMAN	Polyadenylate-binding protein 4-like	138	152	GYAFVHFQNQSAADR	G1dEN9GlcNAc	146	N2H9F0S0	01Y41Y41M(31M21M21M31G)61M(31M21M)61M	Mannose	253.65	1	N,1;	0
TR2	19929	91.15	1212.84	1212.84	3	-5.92816	P0CB38	PAB4L_HUMAN	Polyadenylate-binding protein 4-like	138	152	GYAFVHFQNQSAADR	G1dEN9GlcNAc	146	N2H9F0S0	01Y41Y41M(31M21M21M)61M(31M21M)61M21M	Mannose	250.98	1	N,1;	0
TR2	19929	91.15	1212.17	1212.18	3	-13.2804	Q95604	1C17_HUMAN	HLA class I histocompatibility antigen, Cw-17 alpha chain	107	121	GYYNQSEAGSHTIQR	G1dEN4GlcNAc	110	N6H4F0S0	01Y41Y41M(31M41Y)(41Y)61M(21Y41L)61Y	Complex	87.69	1	N,1;	0
TR2	19929	91.15	1212.17	1212.18	3	-13.2804	Q95604	1C17_HUMAN	HLA class I histocompatibility antigen, Cw-17 alpha chain	107	121	GYYNQSEAGSHTIQR	G1dEN4GlcNAc	110	N6H4F0S0	01Y41Y41M(31M41Y41L31Y)(41Y)61M61Y	Complex	87.42	1	N,1;	0
TR3	20038	91.22	956.094	956.091	3	2.959	Q5TAX3	TUT4_HUMAN	Terminal uridylyltransferase 4	600	611	KTETDNQSNAMK	K1dEN6GlcNAcK12dE	605	N2H6F0S0	01Y41Y41M(31M21M)61M(31M)61M	Mannose	92.04	1	N,2;	1	iI2-3-B/Y,C/Z,
TR3	20038	91.22	956.094	956.086	3	7.83932	Q9NUV7	SPTC3_HUMAN	Serine palmitoyltransferase 3	20	31	QSNGSQSRNCTK	Q1dEN3GlcNAcC10CamK12dE	22	N2H6F0S0	01Y41Y41M(31M21M)61M(31M)61M	Mannose	90	1	N,2;	1	iI2-3-B/Y,C/Z,
TR3	20038	91.22	956.094	956.091	3	2.959	Q5TAX3	TUT4_HUMAN	Terminal uridylyltransferase 4	600	611	KTETDNQSNAMK	K1dEN6GlcNAcK12dE	605	N2H6F0S0	01Y41Y41M(31M)61M(31M21M)61M	Mannose	84.79	1	N,2;	4	iI2-3-X15/C,iI2-3-X35/B,iI2-3-X45/C,iI2-3-B/Y,C/Z,
TR3	20038	91.22	956.094	956.086	3	7.83932	Q9NUV7	SPTC3_HUMAN	Serine palmitoyltransferase 3	20	31	QSNGSQSRNCTK	Q1dEN3GlcNAcC10CamK12dE	22	N2H6F0S0	01Y41Y41M(31M)61M(31M21M)61M	Mannose	82.75	1	N,2;	4	iI2-3-X15/C,iI2-3-X35/B,iI2-3-X45/C,iI2-3-B/Y,C/Z,
TR3	20038	91.22	956.427	956.421	3	5.59152	A0AVI2	FR1L5_HUMAN	Fer-1-like protein 5	1730	1742	TANVDLVDDNLSR	T1dEN10GlcNAc	1739	N2H6F0S0	01Y41Y41M(31M)61M(31M21M)61M	Mannose	79.59	1	N,0;	4	iI2-3-X15/C,iI2-3-X35/B,iI2-3-X45/C,iI2-3-B/Y,C/Z,
TR3	20038	91.22	956.427	956.421	3	5.59152	A0AVI2	FR1L5_HUMAN	Fer-1-like protein 5	1730	1742	TANVDLVDDNLSR	T1dEN10GlcNAc	1739	N2H6F0S0	01Y41Y41M(31M21M)61M(31M)61M	Mannose	70.23	1	N,0;	1	iI2-3-B/Y,C/Z,
TR3	20056	91.31	1249.51	1249.51	2	-2.59326	P38571	LICH_HUMAN	Lysosomal acid lipase/cholesteryl ester hydrolase	271	276	NLNMSR	N1dEN3GlcNAc	273	N2H8F0S0	01Y41Y41M(31M21M21M31G)61M(31M)61M	Mannose	124.63	1	N,0;	0
TR1	19987	91.38	1313.58	1313.58	2	-3.02489	Q13643	FHL3_HUMAN	Four and a half LIM domains protein 3	10	18	CNESLYGRK	C1dE@CamN2GlcNAcK9dE	11	N2H6F0S0	01Y41Y41M(31M)61M(31M21M)61M	Mannose	80.49	1	N,1;	1	iI2-3-B/Y,C/Z,
TR1	19987	91.38	1313.58	1313.59	2	-5.5348	B2RTY4	MYO9A_HUMAN	Unconventional myosin-IXa	821	831	DGIFANSTSSK	D1dEN6GlcNAcK11dE	826	N2H6F0S0	01Y41Y41M(31M)61M(31M21M)61M	Mannose	79.31	1	N,0;	1	iI2-3-B/Y,C/Z,
TR1	19987	91.38	1313.58	1313.58	2	1.0251	Q9HC73	CRLF2_HUMAN	Cytokine receptor-like factor 2	101	111	NGTHPVFTASR	N1GlcNAc@dE	101	N2H6F0S0	01Y41Y41M(31M)61M(31M21M)61M	Mannose	75.7	1	N,0;	1	iI2-3-B/Y,C/Z,
TR1	19987	91.38	1313.58	1313.58	2	-3.02489	Q13643	FHL3_HUMAN	Four and a half LIM domains protein 3	10	18	CNESLYGRK	C1dE@CamN2GlcNAcK9dE	11	N2H6F0S0	01Y41Y41M(31M21M)61M(31M)61M	Mannose	72.36	1	N,1;	1	iI2-3-B/Y,C/Z,
TR1	19987	91.38	1313.58	1313.59	2	-5.5348	B2RTY4	MYO9A_HUMAN	Unconventional myosin-IXa	821	831	DGIFANSTSSK	D1dEN6GlcNAcK11dE	826	N2H6F0S0	01Y41Y41M(31M21M)61M(31M)61M	Mannose	71.22	1	N,0;	1	iI2-3-B/Y,C/Z,
TR1	19987	91.38	1313.58	1313.58	2	1.0251	Q9HC73	CRLF2_HUMAN	Cytokine receptor-like factor 2	101	111	NGTHPVFTASR	N1GlcNAc@dE	101	N2H6F0S0	01Y41Y41M(31M21M)61M(31M)61M	Mannose	67.69	1	N,0;	1	iI2-3-B/Y,C/Z,
TR2	20000	91.51	1158.82	1158.82	3	2.74501	Q95604	1C17_HUMAN	HLA class I histocompatibility antigen, Cw-17 alpha chain	107	121	GYYNQSEAGSHTIQR	G1dEN4GlcNAc	110	N2H8F0S0	01Y41Y41M(31M21M)61M(31M21M)61M21M	Mannose	345.19	1	N,1;	1	iI2-3-B/Y,C/Z,
TR2	20000	91.51	1158.82	1158.82	3	2.74501	P30501	1C02_HUMAN	HLA class I histocompatibility antigen, Cw-2 alpha chain	107	121	GYYNQSEAGSHTLQR	G1dEN4GlcNAc	110	N2H8F0S0	01Y41Y41M(31M21M)61M(31M21M)61M21M	Mannose	345.19	1	N,1;	1	iI2-3-B/Y,C/Z,
TR2	20000	91.51	1158.82	1158.82	3	2.74501	Q95604	1C17_HUMAN	HLA class I histocompatibility antigen, Cw-17 alpha chain	107	121	GYYNQSEAGSHTIQR	G1dEN4GlcNAc	110	N2H8F0S0	01Y41Y41M(31M21M21M)61M(31M21M)61M	Mannose	342.48	1	N,1;	0
TR2	20000	91.51	1158.82	1158.82	3	2.74501	P30501	1C02_HUMAN	HLA class I histocompatibility antigen, Cw-2 alpha chain	107	121	GYYNQSEAGSHTLQR	G1dEN4GlcNAc	110	N2H8F0S0	01Y41Y41M(31M21M21M)61M(31M21M)61M	Mannose	342.48	1	N,1;	0
TR2	20000	91.51	1158.82	1158.82	3	-1.64565	P0CB38	PAB4L_HUMAN	Polyadenylate-binding protein 4-like	138	152	GYAFVHFQNQSAADR	G1dEN9GlcNAc	146	N2H8F0S0	01Y41Y41M(31M21M)61M(31M21M)61M21M	Mannose	261.22	1	N,0;	1	iI2-3-B/Y,C/Z,
TR2	20000	91.51	1158.82	1158.82	3	1.57745	Q15149	PLEC_HUMAN	Plectin	3648	3661	GFFDPNTHENLTYR	G1dEN10GlcNAc	3657	N2H8F0S0	01Y41Y41M(31M21M)61M(31M21M)61M21M	Mannose	257.74	1	N,1;	1	iI2-3-B/Y,C/Z,
TR2	20000	91.51	1158.82	1158.82	3	-1.64565	P0CB38	PAB4L_HUMAN	Polyadenylate-binding protein 4-like	138	152	GYAFVHFQNQSAADR	G1dEN9GlcNAc	146	N2H8F0S0	01Y41Y41M(31M21M21M)61M(31M21M)61M	Mannose	255.83	1	N,0;	0
TR2	20000	91.51	1158.82	1158.82	3	0.581605	P40145	ADCY8_HUMAN	Adenylate cyclase type 8	773	785	KTCCWINETYLAR	K1dEC3CamC4CamN7GlcNAc	779	N2H8F0S0	01Y41Y41M(31M21M)61M(31M21M)61M21M	Mannose	253.93	1	N,1;	1	iI2-3-B/Y,C/Z,
TR2	20000	91.51	1158.82	1158.82	3	1.94333	P20023	CR2_HUMAN	Complement receptor type 2	909	923	EVNCSSPADMDGIQK	E1dEN3GlcNAcC4CamK15dE	911	N2H8F0S0	01Y41Y41M(31M21M)61M(31M21M)61M21M	Mannose	253.73	1	N,1;	1	iI2-3-B/Y,C/Z,
TR2	20000	91.51	1158.82	1158.82	3	1.57745	Q15149	PLEC_HUMAN	Plectin	3648	3661	GFFDPNTHENLTYR	G1dEN10GlcNAc	3657	N2H8F0S0	01Y41Y41M(31M21M21M)61M(31M21M)61M	Mannose	252.33	1	N,1;	0
TR2	20000	91.51	1158.82	1158.82	3	1.94333	P20023	CR2_HUMAN	Complement receptor type 2	909	923	EVNCSSPADMDGIQK	E1dEN3GlcNAcC4CamK15dE	911	N2H8F0S0	01Y41Y41M(31M21M21M)61M(31M21M)61M	Mannose	251.02	1	N,1;	0
TR2	20000	91.51	1158.82	1158.82	3	0.581605	P40145	ADCY8_HUMAN	Adenylate cyclase type 8	773	785	KTCCWINETYLAR	K1dEC3CamC4CamN7GlcNAc	779	N2H8F0S0	01Y41Y41M(31M21M21M)61M(31M21M)61M	Mannose	248.52	1	N,1;	0
TR1	20020	91.55	731.566	731.571	4	-6.62673	Q5JRA6	TGO1_HUMAN	Transport and Golgi organization protein 1 homolog	248	260	TSNSSQVSNEQDK	T1dEN3GlcNAcK13dE	250	N2H6F0S0	01Y41Y41M(31M21M)61M(31M)61M	Mannose	36.26	1	N,1;	3	iI2-3-A34/Y,iI2-3-A34/Y,04AI3,iI2-3-A24/Y,
TR1	20027	91.58	957.902	957.902	4	-0.220571	Q95604	1C17_HUMAN	HLA class I histocompatibility antigen, Cw-17 alpha chain	107	121	GYYNQSEAGSHTIQR	G1dEN4GlcNAc	110	N4H5F1S1	01Y41Y41M(31M41Y(31F)41L)61M61Y41L32S	Complex	101.85	2	N,0;	2	iII4-5-A35/Z,iII4-5-A25/Z,
TR1	20027	91.58	957.902	957.902	4	-0.220571	P30501	1C02_HUMAN	HLA class I histocompatibility antigen, Cw-2 alpha chain	107	121	GYYNQSEAGSHTLQR	G1dEN4GlcNAc	110	N4H5F1S1	01Y41Y41M(31M41Y(31F)41L)61M61Y41L32S	Complex	101.85	2	N,0;	2	iII4-5-A35/Z,iII4-5-A25/Z,
TR1	20027	91.58	957.902	957.902	4	-0.220571	Q95604	1C17_HUMAN	HLA class I histocompatibility antigen, Cw-17 alpha chain	107	121	GYYNQSEAGSHTIQR	G1dEN4GlcNAc	110	N4H5F1S1	01Y41Y41M(31M41Y41L21F)61M61Y41L32S	Complex	99.96	1	N,0;	0
TR1	20027	91.58	957.902	957.902	4	-0.220571	P30501	1C02_HUMAN	HLA class I histocompatibility antigen, Cw-2 alpha chain	107	121	GYYNQSEAGSHTLQR	G1dEN4GlcNAc	110	N4H5F1S1	01Y41Y41M(31M41Y41L21F)61M61Y41L32S	Complex	99.96	1	N,0;	0
TR2	20031	91.66	1189.99	1189.99	2	3.47731	Q53EL9	SEZ6_HUMAN	Seizure protein 6 homolog	422	427	NATTGR	N1GlcNAc@dE	422	N2H8F0S0	01Y41Y41M(31M21M21M31G)61M(31M)61M	Mannose	144.34	2	N,0;	0
TR1	20045	91.67	1053.45	1053.44	3	1.58467	Q8TCJ2	STT3B_HUMAN	Dolichyl-diphosphooligosaccharide--protein glycosyltransferase subunit STT3B	637	647	AMSSNETAAYK	A1dEN5GlcNAcK11dE	641	N2H9F0S0	01Y41Y41M(31M21M21M31G31G)61M(31M)61M	Mannose	140.44	1	N,9;	0
TR2	20055	91.79	996.774	996.767	3	6.91102	Q95604	1C17_HUMAN	HLA class I histocompatibility antigen, Cw-17 alpha chain	107	121	GYYNQSEAGSHTIQR	G1dEN4GlcNAc	110	N2H5F0S0	01Y41Y41M(31M)61M(31M)61M	Mannose	161.85	1	N,1;	24	03AI2,iI2-3-X15/C,iI2-3-X35/B,BI1,BII1,BIII1,BI2,iI2-3-X45/C,iI2-4-A03/Z,iII2-4-A03/Z,iIII2-3-A03/Z,iI3-4-X01/C,iI3-4-B/Y,C/Z,iII3-4-B/Y,C/Z,iIII3-3-B/Y,C/Z,iI2-3-B/Y,C/Z,YI1,YI2,iI3III3Y,iII3III3Y,YI3,iI4II4Y,iI4III3Y,iII4III3Y,02XI1,YI4,YII4,YIII3,ZI1,Y
TR2	20055	91.79	996.774	996.767	3	6.91102	P30501	1C02_HUMAN	HLA class I histocompatibility antigen, Cw-2 alpha chain	107	121	GYYNQSEAGSHTLQR	G1dEN4GlcNAc	110	N2H5F0S0	01Y41Y41M(31M)61M(31M)61M	Mannose	161.85	1	N,1;	24	03AI2,iI2-3-X15/C,iI2-3-X35/B,BI1,BII1,BIII1,BI2,iI2-3-X45/C,iI2-4-A03/Z,iII2-4-A03/Z,iIII2-3-A03/Z,iI3-4-X01/C,iI3-4-B/Y,C/Z,iII3-4-B/Y,C/Z,iIII3-3-B/Y,C/Z,iI2-3-B/Y,C/Z,YI1,YI2,iI3III3Y,iII3III3Y,YI3,iI4II4Y,iI4III3Y,iII4III3Y,02XI1,YI4,YII4,YIII3,ZI1,Y
TR1	20087	91.88	963.726	963.725	3	0.774197	O00469	PLOD2_HUMAN	Procollagen-lysine,2-oxoglutarate 5-dioxygenase 2	695	703	YNCSIESPR	Y1dEN2GlcNAcC3Cam	696	N2H8F0S0	01Y41Y41M(31M21M)61M(31M21M)61M21M	Mannose	99.64	1	N,1;	1	iI2-3-B/Y,C/Z,
TR1	20087	91.88	963.726	963.725	3	0.774197	O00469	PLOD2_HUMAN	Procollagen-lysine,2-oxoglutarate 5-dioxygenase 2	695	703	YNCSIESPR	Y1dEN2GlcNAcC3Cam	696	N2H8F0S0	01Y41Y41M(31M21M21M)61M(31M21M)61M	Mannose	97.27	1	N,1;	0
TR1	20087	91.88	963.726	963.728	3	-2.62407	Q9HBM0	VEZA_HUMAN	Vezatin	642	650	NDTEEESNK	N1GlcNAc@dEK9dE	642	N2H8F0S0	01Y41Y41M(31M21M)61M(31M21M)61M21M	Mannose	75.82	1	N,0;	1	iI2-3-B/Y,C/Z,
TR1	20087	91.88	963.726	963.731	3	-5.66121	Q15722	LT4R1_HUMAN	Leukotriene B4 receptor 1	163	171	TNMSLCFPR	T1dEN2GlcNAcC6Cam	164	N2H8F0S0	01Y41Y41M(31M21M)61M(31M21M)61M21M	Mannose	75.82	1	N,0;	1	iI2-3-B/Y,C/Z,
TR1	20087	91.88	963.726	963.728	3	-2.62407	Q9HBM0	VEZA_HUMAN	Vezatin	642	650	NDTEEESNK	N1GlcNAc@dEK9dE	642	N2H8F0S0	01Y41Y41M(31M21M21M)61M(31M21M)61M	Mannose	73.48	1	N,0;	0
TR1	20087	91.88	963.726	963.731	3	-5.66121	Q15722	LT4R1_HUMAN	Leukotriene B4 receptor 1	163	171	TNMSLCFPR	T1dEN2GlcNAcC6Cam	164	N2H8F0S0	01Y41Y41M(31M21M21M)61M(31M21M)61M	Mannose	73.48	1	N,0;	0
TR1	20134	92.12	854.688	854.682	3	6.03741	Q96T23	RSF1_HUMAN	Remodeling and spacing factor 1	216	225	NSSQQDNSSR	N1dEN7GlcNAc	222	N2H6F0S0	01Y41Y41M(31M)61M(31M21M)61M	Mannose	36.06	2	N,1;	4	iI2-3-X15/C,iI2-3-X35/B,iI2-3-X45/C,iI2-3-B/Y,C/Z,
TR1	20134	92.12	854.688	854.682	3	6.03741	Q96T23	RSF1_HUMAN	Remodeling and spacing factor 1	216	225	NSSQQDNSSR	N1dEN7GlcNAc	222	N2H6F0S0	01Y41Y41M(31M21M)61M(31M)61M	Mannose	36.06	2	N,1;	2	iI2-3-A34/Y,iI2-3-B/Y,C/Z,
TR3	20224	92.14	1266.85	1266.86	3	-1.69398	Q15149	PLEC_HUMAN	Plectin	3648	3661	GFFDPNTHENLTYR	G1dEN10GlcNAc	3657	N2H10F0S0	01Y41Y41M(31M21M21M31G)61M(31M21M)61M21M	Mannose	273.24	1	N,1;	0
TR3	20224	92.14	1266.85	1266.86	3	-4.64299	P0CB38	PAB4L_HUMAN	Polyadenylate-binding protein 4-like	138	152	GYAFVHFQNQSAADR	G1dEN9GlcNAc	146	N2H10F0S0	01Y41Y41M(31M21M21M31G)61M(31M21M)61M21M	Mannose	268.98	1	N,1;	0
TR3	20224	92.14	1266.85	1266.86	3	-1.69398	Q15149	PLEC_HUMAN	Plectin	3648	3661	GFFDPNTHENLTYR	G1dEN10GlcNAc	3657	N2H10F0S0	01Y41Y41M(31M21M21M31G31G)61M(31M21M)61M	Mannose	267.77	1	N,1;	0
TR3	20224	92.14	1266.85	1266.86	3	-4.64299	P0CB38	PAB4L_HUMAN	Polyadenylate-binding protein 4-like	138	152	GYAFVHFQNQSAADR	G1dEN9GlcNAc	146	N2H10F0S0	01Y41Y41M(31M21M21M31G31G)61M(31M21M)61M	Mannose	263.51	1	N,1;	0
TR3	20231	92.17	1212.84	1212.84	3	-0.425455	Q95604	1C17_HUMAN	HLA class I histocompatibility antigen, Cw-17 alpha chain	107	121	GYYNQSEAGSHTIQR	G1dEN4GlcNAc	110	N2H9F0S0	01Y41Y41M(31M21M21M31G31G)61M(31M)61M	Mannose	204.16	2	N,0;	0
TR3	20231	92.17	1212.84	1212.84	3	-0.425455	P30501	1C02_HUMAN	HLA class I histocompatibility antigen, Cw-2 alpha chain	107	121	GYYNQSEAGSHTLQR	G1dEN4GlcNAc	110	N2H9F0S0	01Y41Y41M(31M21M21M31G31G)61M(31M)61M	Mannose	204.16	2	N,0;	0
TR3	20254	92.28	1158.82	1158.82	3	5.75746	Q495M3	S36A2_HUMAN	Proton-coupled amino acid transporter 2	469	483	SEDSHPFSNSTTFVR	S1dEN9GlcNAc	477	N2H8F0S0	01Y41Y41M(31M21M)61M(31M21M)61M21M	Mannose	75.42	1	N,0;	1	iI2-3-B/Y,C/Z,
TR2	20165	92.33	1313.59	1313.59	2	-1.90363	Q99543	DNJC2_HUMAN	DnaJ homolog subfamily C member 2	608	618	AAQEQVLNASR	A1dEN8GlcNAc	615	N2H6F0S0	01Y41Y41M(31M)61M(31M21M)61M	Mannose	81.89	1	N,1;	1	iI2-3-B/Y,C/Z,
TR2	20165	92.33	1313.59	1313.59	2	-1.90363	Q99543	DNJC2_HUMAN	DnaJ homolog subfamily C member 2	608	618	AAQEQVLNASR	A1dEN8GlcNAc	615	N2H6F0S0	01Y41Y41M(31M21M)61M(31M)61M	Mannose	76.59	1	N,1;	1	iI2-3-B/Y,C/Z,
TR2	20165	92.33	1313.59	1313.59	2	-3.45357	Q9Y678	COPG1_HUMAN	Coatomer subunit gamma-1	33	42	VFNETPINPR	V1dEN3GlcNAc	35	N2H6F0S0	01Y41Y41M(31M)61M(31M21M)61M	Mannose	69.82	1	N,1;	1	iI2-3-B/Y,C/Z,
TR2	20165	92.33	1313.59	1313.59	2	-3.45357	Q9Y678	COPG1_HUMAN	Coatomer subunit gamma-1	33	42	VFNETPINPR	V1dEN3GlcNAc	35	N2H6F0S0	01Y41Y41M(31M21M)61M(31M)61M	Mannose	64.62	1	N,1;	1	iI2-3-B/Y,C/Z,
TR3	20283	92.43	1104.8	1104.8	3	0.921962	Q95604	1C17_HUMAN	HLA class I histocompatibility antigen, Cw-17 alpha chain	107	121	GYYNQSEAGSHTIQR	G1dEN4GlcNAc	110	N2H7F0S0	01Y41Y41M(31M21M)61M(31M21M)61M	Mannose	206.28	1	N,0;	1	iI2-3-B/Y,C/Z,
TR3	20283	92.43	1104.8	1104.8	3	0.921962	P30501	1C02_HUMAN	HLA class I histocompatibility antigen, Cw-2 alpha chain	107	121	GYYNQSEAGSHTLQR	G1dEN4GlcNAc	110	N2H7F0S0	01Y41Y41M(31M21M)61M(31M21M)61M	Mannose	206.28	1	N,0;	1	iI2-3-B/Y,C/Z,
TR3	20283	92.43	1104.8	1104.8	3	0.921962	Q95604	1C17_HUMAN	HLA class I histocompatibility antigen, Cw-17 alpha chain	107	121	GYYNQSEAGSHTIQR	G1dEN4GlcNAc	110	N2H7F0S0	01Y41Y41M(31M)61M(31M21M)61M21M	Mannose	198.49	1	N,0;	4	iI2-3-X15/C,iI2-3-X35/B,iI2-3-X45/C,iI2-3-B/Y,C/Z,
TR3	20283	92.43	1104.8	1104.8	3	0.921962	P30501	1C02_HUMAN	HLA class I histocompatibility antigen, Cw-2 alpha chain	107	121	GYYNQSEAGSHTLQR	G1dEN4GlcNAc	110	N2H7F0S0	01Y41Y41M(31M)61M(31M21M)61M21M	Mannose	198.49	1	N,0;	4	iI2-3-X15/C,iI2-3-X35/B,iI2-3-X45/C,iI2-3-B/Y,C/Z,
TR3	20285	92.44	1088.48	1088.47	3	5.64907	Q9P265	DIP2B_HUMAN	Disco-interacting protein 2 homolog B	1271	1280	TRGINLSCVR	T1dEN5GlcNAcC8Cam	1275	N2H10F0S0	01Y41Y41M(31M21M21M31G31G21G)61M(31M)61M	Mannose	92.15	1	N,1;	0
TR3	20285	92.44	1088.48	1088.47	3	5.64907	Q9P265	DIP2B_HUMAN	Disco-interacting protein 2 homolog B	1271	1280	TRGINLSCVR	T1dEN5GlcNAcC8Cam	1275	N2H10F0S0	01Y41Y41M(31M21M21M31G31G)61M(31M21M)61M	Mannose	87.48	1	N,1;	0
TR2	20202	92.51	1027.43	1027.43	2	-0.050414	Q53EL9	SEZ6_HUMAN	Seizure protein 6 homolog	422	427	NATTGR	N1GlcNAc@dE	422	N2H6F0S0	01Y41Y41M(31M)61M(31M21M)61M	Mannose	75.31	1	N,0;	2	iI2-3-X35/B,iI2-3-B/Y,C/Z,
TR2	20202	92.51	1027.43	1027.43	2	-0.050414	Q53EL9	SEZ6_HUMAN	Seizure protein 6 homolog	422	427	NATTGR	N1GlcNAc@dE	422	N2H6F0S0	01Y41Y41M(31M21M)61M(31M)61M	Mannose	73.01	1	N,0;	2	iI2-3-A34/Y,iI2-3-B/Y,C/Z,
TR3	20304	92.54	1266.86	1266.85	3	3.7093	Q95604	1C17_HUMAN	HLA class I histocompatibility antigen, Cw-17 alpha chain	107	121	GYYNQSEAGSHTIQR	G1dEN4GlcNAc	110	N2H10F0S0	01Y41Y41M(31M21M21M31G31G21G)61M(31M)61M	Mannose	91.64	1	N,0;	1	iIII2-3-B/Y,C/Z,
TR3	20304	92.54	1266.86	1266.85	3	3.7093	P30501	1C02_HUMAN	HLA class I histocompatibility antigen, Cw-2 alpha chain	107	121	GYYNQSEAGSHTLQR	G1dEN4GlcNAc	110	N2H10F0S0	01Y41Y41M(31M21M21M31G31G21G)61M(31M)61M	Mannose	91.64	1	N,0;	1	iIII2-3-B/Y,C/Z,
TR3	20327	92.65	1087.81	1087.81	3	3.90506	Q8WV93	AFG1L_HUMAN	AFG1-like ATPase	375	384	NIPQFTLANR	N1dEN9GlcNAc	383	N2H10F0S0	01Y41Y41M(31M21M21M31G)61M(31M21M)61M21M	Mannose	96.9	1	N,1;	0
TR3	20327	92.65	1087.81	1087.81	3	3.90506	Q8WV93	AFG1L_HUMAN	AFG1-like ATPase	375	384	NIPQFTLANR	N1dEN9GlcNAc	383	N2H10F0S0	01Y41Y41M(31M21M21M31G31G)61M(31M21M)61M	Mannose	89.79	1	N,1;	0
TR3	20358	92.81	1189.99	1189.99	2	4.29797	Q53EL9	SEZ6_HUMAN	Seizure protein 6 homolog	422	427	NATTGR	N1GlcNAc@dE	422	N2H8F0S0	01Y41Y41M(31M21M)61M(31M21M)61M21M	Mannose	164.07	1	N,0;	1	iI2-3-B/Y,C/Z,
TR3	20358	92.81	1189.99	1189.99	2	4.29797	Q53EL9	SEZ6_HUMAN	Seizure protein 6 homolog	422	427	NATTGR	N1GlcNAc@dE	422	N2H8F0S0	01Y41Y41M(31M21M21M)61M(31M21M)61M	Mannose	153.77	1	N,0;	0
TR3	20358	92.81	1190.99	1190.98	2	7.18217	Q06546	GABPA_HUMAN	GA-binding protein alpha chain	308	313	SSPGNR	S1dEN5GlcNAc	312	N2H8F0S0	01Y41Y41M(31M21M)61M(31M21M)61M21M	Mannose	50.28	2	N,0;	1	iI2-3-B/Y,C/Z,
TR3	20358	92.81	1190.99	1190.98	2	7.18217	Q06546	GABPA_HUMAN	GA-binding protein alpha chain	308	313	SSPGNR	S1dEN5GlcNAc	312	N2H8F0S0	01Y41Y41M(31M21M21M)61M(31M21M)61M	Mannose	50.28	2	N,0;	0
TR3	20358	92.81	1190.99	1190.98	2	7.18217	Q06546	GABPA_HUMAN	GA-binding protein alpha chain	308	313	SSPGNR	S1dEN5GlcNAc	312	N2H8F0S0	01Y41Y41M(31M21M21M31G)61M(31M)61M	Mannose	48.12	1	N,0;	0
TR2	20278	92.9	999.427	999.426	3	1.45993	Q8TCJ2	STT3B_HUMAN	Dolichyl-diphosphooligosaccharide--protein glycosyltransferase subunit STT3B	637	647	AMSSNETAAYK	A1dEN5GlcNAcK11dE	641	N2H8F0S0	01Y41Y41M(31M21M21M31G)61M(31M)61M	Mannose	91.64	1	N,2;	0
TR2	20278	92.9	999.427	999.426	3	1.45993	Q8TCJ2	STT3B_HUMAN	Dolichyl-diphosphooligosaccharide--protein glycosyltransferase subunit STT3B	637	647	AMSSNETAAYK	A1dEN5GlcNAcK11dE	641	N2H8F0S0	01Y41Y41M(31M21M21M)61M(31M21M)61M	Mannose	89.5	1	N,2;	0
TR2	20279	92.9	963.726	963.725	3	1.21752	O00469	PLOD2_HUMAN	Procollagen-lysine,2-oxoglutarate 5-dioxygenase 2	695	703	YNCSIESPR	Y1dEN2GlcNAcC3Cam	696	N2H8F0S0	01Y41Y41M(31M21M21M31G)61M(31M)61M	Mannose	81.16	2	N,1;	0
TR2	20285	92.93	1579.66	1579.66	2	-1.65837	Q8TCJ2	STT3B_HUMAN	Dolichyl-diphosphooligosaccharide--protein glycosyltransferase subunit STT3B	637	647	AMSSNETAAYK	A1dEN5GlcNAcK11dE	641	N2H9F0S0	01Y41Y41M(31M21M21M)61M(31M21M)61M21M	Mannose	140	2	N,1;	0
TR2	20285	92.93	1579.66	1579.66	2	-1.65837	Q8TCJ2	STT3B_HUMAN	Dolichyl-diphosphooligosaccharide--protein glycosyltransferase subunit STT3B	637	647	AMSSNETAAYK	A1dEN5GlcNAcK11dE	641	N2H9F0S0	01Y41Y41M(31M21M21M31G)61M(31M21M)61M	Mannose	140	2	N,1;	0
TR2	20285	92.93	1579.66	1579.66	2	-1.65837	Q5TCS8-6	KAD9_HUMAN	Isoform 6 of Adenylate kinase 9	1220	1229	GISENTTCYK	G1dEN5GlcNAcC8CamK10dE	1224	N2H9F0S0	01Y41Y41M(31M21M21M)61M(31M21M)61M21M	Mannose	105.88	2	N,1;	0
TR2	20285	92.93	1579.66	1579.66	2	-1.65837	Q5TCS8-6	KAD9_HUMAN	Isoform 6 of Adenylate kinase 9	1220	1229	GISENTTCYK	G1dEN5GlcNAcC8CamK10dE	1224	N2H9F0S0	01Y41Y41M(31M21M21M31G)61M(31M21M)61M	Mannose	105.88	2	N,1;	0
TR2	20285	92.93	1579.66	1579.66	2	-1.65837	Q5TCS8-6	KAD9_HUMAN	Isoform 6 of Adenylate kinase 9	1220	1229	GISENTTCYK	G1dEN5GlcNAcC8CamK10dE	1224	N2H9F0S0	01Y41Y41M(31M21M21M31G31G)61M(31M)61M	Mannose	92.94	1	N,1;	0
TR1	20300	92.95	1374.57	1374.57	3	2.19245	Q95604	1C17_HUMAN	HLA class I histocompatibility antigen, Cw-17 alpha chain	107	121	GYYNQSEAGSHTIQR	G1dEN4GlcNAc	110	N6H7F0S0	01Y41Y41M(31M41Y41L31Y41L)61M61Y41L31Y41L	Complex	186.22	1	N,1;	0
TR1	20300	92.95	1374.57	1374.57	3	2.19245	P30501	1C02_HUMAN	HLA class I histocompatibility antigen, Cw-2 alpha chain	107	121	GYYNQSEAGSHTLQR	G1dEN4GlcNAc	110	N6H7F0S0	01Y41Y41M(31M41Y41L31Y41L)61M61Y41L31Y41L	Complex	186.22	1	N,1;	0
TR1	20300	92.95	1374.24	1374.24	3	-1.30485	Q95604	1C17_HUMAN	HLA class I histocompatibility antigen, Cw-17 alpha chain	107	121	GYYNQSEAGSHTIQR	G1dEN4GlcNAc	110	N4H5F3S1	01Y(61F)41Y41M(31M21Y(31F)41L21F)61M61Y41L32S	Complex	180.25	1	N,1;	0
TR1	20300	92.95	1374.24	1374.24	3	-1.30485	P30501	1C02_HUMAN	HLA class I histocompatibility antigen, Cw-2 alpha chain	107	121	GYYNQSEAGSHTLQR	G1dEN4GlcNAc	110	N4H5F3S1	01Y(61F)41Y41M(31M21Y(31F)41L21F)61M61Y41L32S	Complex	180.25	1	N,1;	0
TR2	20301	93.01	909.706	909.708	3	-1.48866	O00469	PLOD2_HUMAN	Procollagen-lysine,2-oxoglutarate 5-dioxygenase 2	695	703	YNCSIESPR	Y1dEN2GlcNAcC3Cam	696	N2H7F0S0	01Y41Y41M(31M21M)61M(31M21M)61M	Mannose	57.65	1	N,1;	1	iI2-3-B/Y,C/Z,
TR2	20301	93.01	909.706	909.708	3	-1.48866	O00469	PLOD2_HUMAN	Procollagen-lysine,2-oxoglutarate 5-dioxygenase 2	695	703	YNCSIESPR	Y1dEN2GlcNAcC3Cam	696	N2H7F0S0	01Y41Y41M(31M)61M(31M21M)61M21M	Mannose	55.57	1	N,1;	4	iI2-3-X15/C,iI2-3-X35/B,iI2-3-X45/C,iI2-3-B/Y,C/Z,
TR1	20321	93.05	1035.94	1035.93	4	5.69778	Q495M3	S36A2_HUMAN	Proton-coupled amino acid transporter 2	469	483	SEDSHPFSNSTTFVR	S1dEN9GlcNAc	477	N4H6F2S1	01Y41Y41M(31M(21Y(31F)41L32S)41Y(31F)41L)61M61M	Hybrid	50.22	1	N,0;	0
TR1	20321	93.05	1035.43	1035.44	4	-1.54694	P39086	GRIK1_HUMAN	Glutamate receptor ionotropic, kainate 1	813	825	WWRGNGCPEEDNK	W1dEN5GlcNAcC7CamK13dE	817	N4H6F4S0	01Y41Y41M(31M(21Y(31F)41L21F)41Y(31F)41L21F)61M61M	Hybrid	39.78	1	N,0;	10	24AII4,ZI1,YI1,YI2,35XII4,iI3II3Y,iI3III3Y,iI4II3Y,iI4III3Y,15XII3,YII3,YI1,
TR1	20321	93.05	1035.43	1035.44	4	-1.54694	P39086	GRIK1_HUMAN	Glutamate receptor ionotropic, kainate 1	813	825	WWRGNGCPEEDNK	W1dEN5GlcNAcC7CamK13dE	817	N4H6F4S0	01Y(61F)41Y41M(31M(21Y(31F)41L21F)41Y41L21F)61M61M	Hybrid	36.38	1	N,0;	0
TR3	20484	93.44	1108.96	1108.96	2	2.8993	Q53EL9	SEZ6_HUMAN	Seizure protein 6 homolog	422	427	NATTGR	N1GlcNAc@dE	422	N2H7F0S0	01Y41Y41M(31M21M)61M(31M21M)61M	Mannose	94.49	1	N,0;	1	iI2-3-B/Y,C/Z,
TR3	20484	93.44	1108.96	1108.96	2	2.8993	Q53EL9	SEZ6_HUMAN	Seizure protein 6 homolog	422	427	NATTGR	N1GlcNAc@dE	422	N2H7F0S0	01Y41Y41M(31M21M21M)61M(31M)61M	Mannose	92.03	1	N,0;	1	iI2-3-B/Y,C/Z,iIII2-3-B/Y,C/Z,
TR1	20424	93.57	1171.83	1171.83	3	-2.07068	Q6P5Z2	PKN3_HUMAN	Serine/threonine-protein kinase N3	122	137	QGAENMTHTCASGTPK	Q1dEN5GlcNAcC10CamK16dE	126	N2H8F0S0	01Y41Y41M(31M21M21M31G)61M(31M)61M	Mannose	129.19	1	N,0;	0
TR1	20424	93.57	1171.83	1171.83	3	-2.07068	Q6P5Z2	PKN3_HUMAN	Serine/threonine-protein kinase N3	122	137	QGAENMTHTCASGTPK	Q1dEN5GlcNAcC10CamK16dE	126	N2H8F0S0	01Y41Y41M(31M21M21M)61M(31M21M)61M	Mannose	126.67	1	N,0;	0
TR1	20424	93.57	1171.83	1171.82	3	4.14357	Q969Y0	NXPE3_HUMAN	NXPE family member 3	340	353	QFNDPDNITECLQR	Q1dEN7GlcNAcC11Cam	346	N2H8F0S0	01Y41Y41M(31M21M21M31G)61M(31M)61M	Mannose	112.86	1	N,1;	0
TR1	20424	93.57	1171.83	1171.82	3	4.14357	Q969Y0	NXPE3_HUMAN	NXPE family member 3	340	353	QFNDPDNITECLQR	Q1dEN7GlcNAcC11Cam	346	N2H8F0S0	01Y41Y41M(31M21M21M)61M(31M21M)61M	Mannose	110.38	1	N,1;	0
TR2	20426	93.64	1281.03	1281.02	2	7.83807	O00469	PLOD2_HUMAN	Procollagen-lysine,2-oxoglutarate 5-dioxygenase 2	695	703	YNCSIESPR	Y1dEN2GlcNAcC3Cam	696	N2H6F0S0	01Y41Y41M(31M)61M(31M21M)61M	Mannose	129.04	1	N,1;	1	iI2-3-B/Y,C/Z,
TR2	20426	93.64	1281.03	1281.02	2	7.83807	O00469	PLOD2_HUMAN	Procollagen-lysine,2-oxoglutarate 5-dioxygenase 2	695	703	YNCSIESPR	Y1dEN2GlcNAcC3Cam	696	N2H6F0S0	01Y41Y41M(31M21M)61M(31M)61M	Mannose	123.52	1	N,1;	1	iI2-3-B/Y,C/Z,
TR2	20447	93.75	1496.28	1496.28	3	1.32761	Q95604	1C17_HUMAN	HLA class I histocompatibility antigen, Cw-17 alpha chain	107	121	GYYNQSEAGSHTIQR	G1dEN4GlcNAc	110	N7H8F0S0	01Y41Y41M(31M41Y41L)61M(21Y41L31Y41L)61Y41L31Y41L	Complex	80.75	1	N,0;	0
TR2	20447	93.75	1496.28	1496.28	3	1.32761	P30501	1C02_HUMAN	HLA class I histocompatibility antigen, Cw-2 alpha chain	107	121	GYYNQSEAGSHTLQR	G1dEN4GlcNAc	110	N7H8F0S0	01Y41Y41M(31M41Y41L)61M(21Y41L31Y41L)61Y41L31Y41L	Complex	80.75	1	N,0;	0
TR2	20447	93.75	1496.28	1496.28	3	1.32761	Q95604	1C17_HUMAN	HLA class I histocompatibility antigen, Cw-17 alpha chain	107	121	GYYNQSEAGSHTIQR	G1dEN4GlcNAc	110	N7H8F0S0	01Y41Y41M(31M41Y41L31Y41L)61M(21Y41L31Y41L)61Y41L	Complex	76.46	1	N,0;	0
TR2	20447	93.75	1496.28	1496.28	3	1.32761	P30501	1C02_HUMAN	HLA class I histocompatibility antigen, Cw-2 alpha chain	107	121	GYYNQSEAGSHTLQR	G1dEN4GlcNAc	110	N7H8F0S0	01Y41Y41M(31M41Y41L31Y41L)61M(21Y41L31Y41L)61Y41L	Complex	76.46	1	N,0;	0
TR2	20449	93.76	1026.12	1026.12	3	1.68666	Q9UBS9	SUCO_HUMAN	SUN domain-containing ossification factor	526	538	SISENATATAAPK	S1dEN5GlcNAcK13dE	530	N2H8F0S0	01Y41Y41M(31M21M21M)61M(31M21M)61M	Mannose	122.86	1	N,2;	0
TR2	20449	93.76	1026.12	1026.12	3	1.68666	Q9UBS9	SUCO_HUMAN	SUN domain-containing ossification factor	526	538	SISENATATAAPK	S1dEN5GlcNAcK13dE	530	N2H8F0S0	01Y41Y41M(31M21M)61M(31M21M)61M21M	Mannose	120.45	2	N,2;	1	iI2-3-B/Y,C/Z,
TR2	20449	93.76	1026.12	1026.12	3	1.68666	Q9UBS9	SUCO_HUMAN	SUN domain-containing ossification factor	526	538	SISENATATAAPK	S1dEN5GlcNAcK13dE	530	N2H8F0S0	01Y41Y41M(31M21M21M31G)61M(31M)61M	Mannose	120.45	2	N,2;	1	02AIII2,
TR2	20450	93.77	1122.21	1122.21	4	-3.51779	Q95604	1C17_HUMAN	HLA class I histocompatibility antigen, Cw-17 alpha chain	107	121	GYYNQSEAGSHTIQR	G1dEN4GlcNAc	110	N5H6F3S1	01Y(61F)41Y41M(31M41Y41L)61M21Y(31F)41L31Y(31F)41L32S	Complex	64.55	1	N,0;	0
TR2	20450	93.77	1122.21	1122.21	4	-3.51779	P30501	1C02_HUMAN	HLA class I histocompatibility antigen, Cw-2 alpha chain	107	121	GYYNQSEAGSHTLQR	G1dEN4GlcNAc	110	N5H6F3S1	01Y(61F)41Y41M(31M41Y41L)61M21Y(31F)41L31Y(31F)41L32S	Complex	64.55	1	N,0;	0
TR2	20450	93.77	1122.21	1122.21	4	-3.51779	Q95604	1C17_HUMAN	HLA class I histocompatibility antigen, Cw-17 alpha chain	107	121	GYYNQSEAGSHTIQR	G1dEN4GlcNAc	110	N5H6F3S1	01Y(61F)41Y41M(31M)61M(21Y(31F)41L31Y(31F)41L32S)61Y41L	Complex	59.16	2	N,0;	0
TR2	20450	93.77	1122.21	1122.21	4	-3.51779	Q95604	1C17_HUMAN	HLA class I histocompatibility antigen, Cw-17 alpha chain	107	121	GYYNQSEAGSHTIQR	G1dEN4GlcNAc	110	N5H6F3S1	01Y41Y41M(31M)61M(21Y(31F)41L31Y(31F)41L32S)61Y(31F)41L	Complex	59.16	2	N,0;	0
TR2	20450	93.77	1122.21	1122.21	4	-3.51779	P30501	1C02_HUMAN	HLA class I histocompatibility antigen, Cw-2 alpha chain	107	121	GYYNQSEAGSHTLQR	G1dEN4GlcNAc	110	N5H6F3S1	01Y(61F)41Y41M(31M)61M(21Y(31F)41L31Y(31F)41L32S)61Y41L	Complex	59.16	2	N,0;	0
TR2	20450	93.77	1122.21	1122.21	4	-3.51779	P30501	1C02_HUMAN	HLA class I histocompatibility antigen, Cw-2 alpha chain	107	121	GYYNQSEAGSHTLQR	G1dEN4GlcNAc	110	N5H6F3S1	01Y41Y41M(31M)61M(21Y(31F)41L31Y(31F)41L32S)61Y(31F)41L	Complex	59.16	2	N,0;	0
TR1	20465	93.78	1117.81	1117.8	3	9.07085	Q969Y0	NXPE3_HUMAN	NXPE family member 3	340	353	QFNDPDNITECLQR	Q1dEN7GlcNAcC11Cam	346	N2H7F0S0	01Y41Y41M(31M21M)61M(31M21M)61M	Mannose	86.08	1	N,1;	1	iI2-3-B/Y,C/Z,
TR1	20465	93.78	1117.81	1117.8	3	9.07085	Q969Y0	NXPE3_HUMAN	NXPE family member 3	340	353	QFNDPDNITECLQR	Q1dEN7GlcNAcC11Cam	346	N2H7F0S0	01Y41Y41M(31M21M21M)61M(31M)61M	Mannose	83.65	1	N,1;	1	iI2-3-B/Y,C/Z,iIII2-3-B/Y,C/Z,
TR3	20552	93.78	1053.45	1053.44	3	3.27375	Q15735	PI5PA_HUMAN	Phosphatidylinositol 4,5-bisphosphate 5-phosphatase A	923	934	VAPDRSSNGSSR	V1dEN8GlcNAc	930	N2H9F0S0	01Y41Y41M(31M21M21M31G31G)61M(31M)61M	Mannose	73.87	1	N,0;	0
TR3	20552	93.78	1053.45	1053.44	3	3.27375	Q7Z6L1	TCPR1_HUMAN	Tectonin beta-propeller repeat-containing protein 1	439	452	NATGNSASGLGAGR	N1GlcNAc@dE	439	N2H9F0S0	01Y41Y41M(31M21M21M31G31G)61M(31M)61M	Mannose	73.58	1	N,0;	0
TR3	20552	93.78	1053.45	1053.44	3	3.27375	P00519	ABL1_HUMAN	Tyrosine-protein kinase ABL1	767	777	AGENRSDQVTR	A1dEN4GlcNAc	770	N2H9F0S0	01Y41Y41M(31M21M21M31G31G)61M(31M)61M	Mannose	71.76	1	N,1;	0
TR3	20552	93.78	1053.45	1053.44	3	3.27375	Q15735	PI5PA_HUMAN	Phosphatidylinositol 4,5-bisphosphate 5-phosphatase A	923	934	VAPDRSSNGSSR	V1dEN8GlcNAc	930	N2H9F0S0	01Y41Y41M(31M21M21M31G)61M(31M21M)61M	Mannose	71.58	1	N,0;	0
TR3	20552	93.78	1053.45	1053.44	3	3.27375	Q7Z6L1	TCPR1_HUMAN	Tectonin beta-propeller repeat-containing protein 1	439	452	NATGNSASGLGAGR	N1GlcNAc@dE	439	N2H9F0S0	01Y41Y41M(31M21M21M31G)61M(31M21M)61M	Mannose	71.29	1	N,0;	0
TR3	20552	93.78	1053.45	1053.44	3	3.27375	P00519	ABL1_HUMAN	Tyrosine-protein kinase ABL1	767	777	AGENRSDQVTR	A1dEN4GlcNAc	770	N2H9F0S0	01Y41Y41M(31M21M21M31G)61M(31M21M)61M	Mannose	69.47	1	N,1;	0
TR1	20486	93.88	1063.79	1063.79	3	-0.376579	Q9P2S6	ANKY1_HUMAN	Ankyrin repeat and MYND domain-containing protein 1	660	673	TALHMACEREDDNK	T1dEC7CamN13GlcNAcK14dE	672	N2H6F0S0	01Y41Y41M(31M)61M(31M21M)61M	Mannose	84.71	1	N,1;	5	iI2-3-X15/C,iI2-3-X35/B,iI2-3-X45/C,iI2-3-X35/B,iI2-3-B/Y,C/Z,
TR1	20486	93.88	1063.79	1063.79	3	-0.376579	Q9P2S6	ANKY1_HUMAN	Ankyrin repeat and MYND domain-containing protein 1	660	673	TALHMACEREDDNK	T1dEC7CamN13GlcNAcK14dE	672	N2H6F0S0	01Y41Y41M(31M21M)61M(31M)61M	Mannose	82.32	1	N,1;	2	iI2-3-A34/Y,iI2-3-B/Y,C/Z,
TR1	20486	93.88	1063.79	1063.78	3	8.7531	O60292	SI1L3_HUMAN	Signal-induced proliferation-associated 1-like protein 3	432	446	NEIGGECERNVSFSR	N1dEC7CamN10GlcNAc	441	N2H6F0S0	01Y41Y41M(31M)61M(31M21M)61M	Mannose	78.3	1	N,0;	5	iI2-3-X15/C,iI2-3-X35/B,iI2-3-X45/C,iI2-3-X35/B,iI2-3-B/Y,C/Z,
TR1	20486	93.88	1063.79	1063.79	3	6.4669	Q969Y0	NXPE3_HUMAN	NXPE family member 3	340	353	QFNDPDNITECLQR	Q1dEN7GlcNAcC11Cam	346	N2H6F0S0	01Y41Y41M(31M)61M(31M21M)61M	Mannose	76.5	1	N,1;	5	iI2-3-X15/C,iI2-3-X35/B,iI2-3-X45/C,iI2-3-X35/B,iI2-3-B/Y,C/Z,
TR1	20486	93.88	1063.79	1063.78	3	8.7531	O60292	SI1L3_HUMAN	Signal-induced proliferation-associated 1-like protein 3	432	446	NEIGGECERNVSFSR	N1dEC7CamN10GlcNAc	441	N2H6F0S0	01Y41Y41M(31M21M)61M(31M)61M	Mannose	75.91	1	N,0;	2	iI2-3-A34/Y,iI2-3-B/Y,C/Z,
TR1	20486	93.88	1063.79	1063.79	3	6.4669	Q969Y0	NXPE3_HUMAN	NXPE family member 3	340	353	QFNDPDNITECLQR	Q1dEN7GlcNAcC11Cam	346	N2H6F0S0	01Y41Y41M(31M21M)61M(31M)61M	Mannose	74.11	1	N,1;	2	iI2-3-A34/Y,iI2-3-B/Y,C/Z,
TR2	20478	93.91	972.109	972.101	3	8.87445	Q9Y2E4	DIP2C_HUMAN	Disco-interacting protein 2 homolog C	605	615	DQRDINLSSLR	D1dEN6GlcNAc	610	N2H7F0S0	01Y41Y41M(31M21M)61M(31M21M)61M	Mannose	163.28	1	N,0;	1	iI2-3-B/Y,C/Z,
TR2	20478	93.91	972.109	972.101	3	8.87445	Q9Y2E4	DIP2C_HUMAN	Disco-interacting protein 2 homolog C	605	615	DQRDINLSSLR	D1dEN6GlcNAc	610	N2H7F0S0	01Y41Y41M(31M21M21M)61M(31M)61M	Mannose	160.67	1	N,0;	0
TR2	20478	93.91	972.109	972.106	3	3.64041	P15144	AMPN_HUMAN	Aminopeptidase N	126	136	KLNYTLSQGHR	K1dEN3GlcNAc	128	N2H7F0S0	01Y41Y41M(31M21M21M)61M(31M)61M	Mannose	139.92	2	N,0;	0
TR1	20492	93.91	1195.49	1195.49	4	1.24084	Q95604	1C17_HUMAN	HLA class I histocompatibility antigen, Cw-17 alpha chain	107	121	GYYNQSEAGSHTIQR	G1dEN4GlcNAc	110	N7H8F2S0	01Y41Y41M(31M41Y(31F)41L31Y41L)61M(21Y41L31Y41L)61Y(31F)41L	Complex	84.22	1	N,0;	0
TR1	20492	93.91	1195.49	1195.49	4	1.24084	P30501	1C02_HUMAN	HLA class I histocompatibility antigen, Cw-2 alpha chain	107	121	GYYNQSEAGSHTLQR	G1dEN4GlcNAc	110	N7H8F2S0	01Y41Y41M(31M41Y(31F)41L31Y41L)61M(21Y41L31Y41L)61Y(31F)41L	Complex	84.22	1	N,0;	0
TR2	20507	94.05	1277.2	1277.21	3	-4.59428	Q95604	1C17_HUMAN	HLA class I histocompatibility antigen, Cw-17 alpha chain	107	121	GYYNQSEAGSHTIQR	G1dEN4GlcNAc	110	N4H5F3S0	01Y41Y41M(31M41Y(31F)41L)61M21Y(31F)41L21F	Complex	72.21	1	N,0;	0
TR2	20507	94.05	1277.2	1277.21	3	-4.59428	P30501	1C02_HUMAN	HLA class I histocompatibility antigen, Cw-2 alpha chain	107	121	GYYNQSEAGSHTLQR	G1dEN4GlcNAc	110	N4H5F3S0	01Y41Y41M(31M41Y(31F)41L)61M21Y(31F)41L21F	Complex	72.21	1	N,0;	0
TR2	20507	94.05	1277.2	1277.21	3	-4.59428	Q95604	1C17_HUMAN	HLA class I histocompatibility antigen, Cw-17 alpha chain	107	121	GYYNQSEAGSHTIQR	G1dEN4GlcNAc	110	N4H5F3S0	01Y41Y41M(31M21Y(31F)41L21F)61M61Y41L21F	Complex	71.02	1	N,0;	0
TR2	20507	94.05	1277.2	1277.21	3	-4.59428	P30501	1C02_HUMAN	HLA class I histocompatibility antigen, Cw-2 alpha chain	107	121	GYYNQSEAGSHTLQR	G1dEN4GlcNAc	110	N4H5F3S0	01Y41Y41M(31M21Y(31F)41L21F)61M61Y41L21F	Complex	71.02	1	N,0;	0
TR2	20509	94.06	1035.69	1035.68	4	6.75094	Q95604	1C17_HUMAN	HLA class I histocompatibility antigen, Cw-17 alpha chain	107	121	GYYNQSEAGSHTIQR	G1dEN4GlcNAc	110	N4H6F0S2	01Y41Y41M(31M(21Y41L32S)41Y41L32S)61M61M	Hybrid	114.17	1	N,0;	32	03AI2,iII3-3-C/Y,iII2-3-A34/Y,02AII2,02AIII2,BII2,BIII2,BI1,BI2,iII3-3-B/Y,C/Z,iII3-3-B/Z,BII1,BIII1,CII1,CIII1,BI2,35AII4,BII2,BIII2,iII4-5-X14/C,iIII4-5-X14/C,35AII3,35AIII3,BII3,BIII3,iII2-3-B/Y,C/Z,35AII4,YI1,iII4III5Z,iII5III4Z,YI2,ZII4,ZIII4,iI3II3Y
TR2	20509	94.06	1035.69	1035.68	4	6.75094	P30501	1C02_HUMAN	HLA class I histocompatibility antigen, Cw-2 alpha chain	107	121	GYYNQSEAGSHTLQR	G1dEN4GlcNAc	110	N4H6F0S2	01Y41Y41M(31M(21Y41L32S)41Y41L32S)61M61M	Hybrid	114.17	1	N,0;	32	03AI2,iII3-3-C/Y,iII2-3-A34/Y,02AII2,02AIII2,BII2,BIII2,BI1,BI2,iII3-3-B/Y,C/Z,iII3-3-B/Z,BII1,BIII1,CII1,CIII1,BI2,35AII4,BII2,BIII2,iII4-5-X14/C,iIII4-5-X14/C,35AII3,35AIII3,BII3,BIII3,iII2-3-B/Y,C/Z,35AII4,YI1,iII4III5Z,iII5III4Z,YI2,ZII4,ZIII4,iI3II3Y
TR2	20509	94.06	1034.93	1034.93	4	2.69912	Q95604	1C17_HUMAN	HLA class I histocompatibility antigen, Cw-17 alpha chain	107	121	GYYNQSEAGSHTIQR	G1dEN4GlcNAc	110	N4H6F2S1	01Y41Y41M(31M(21Y(31F)41L32S)41Y(31F)41L)61M61M	Hybrid	85.42	1	N,0;	1	iI4II3Y,iI4III3Y,
TR2	20509	94.06	1034.93	1034.93	4	2.69912	P30501	1C02_HUMAN	HLA class I histocompatibility antigen, Cw-2 alpha chain	107	121	GYYNQSEAGSHTLQR	G1dEN4GlcNAc	110	N4H6F2S1	01Y41Y41M(31M(21Y(31F)41L32S)41Y(31F)41L)61M61M	Hybrid	85.42	1	N,0;	1	iI4II3Y,iI4III3Y,
TR2	20509	94.06	1034.93	1034.93	4	2.69912	Q95604	1C17_HUMAN	HLA class I histocompatibility antigen, Cw-17 alpha chain	107	121	GYYNQSEAGSHTIQR	G1dEN4GlcNAc	110	N4H6F2S1	01Y(61F)41Y41M(31M(21Y41L32S)41Y(31F)41L)61M61M	Hybrid	80.08	1	N,0;	0
TR2	20509	94.06	1034.93	1034.93	4	2.69912	P30501	1C02_HUMAN	HLA class I histocompatibility antigen, Cw-2 alpha chain	107	121	GYYNQSEAGSHTLQR	G1dEN4GlcNAc	110	N4H6F2S1	01Y(61F)41Y41M(31M(21Y41L32S)41Y(31F)41L)61M61M	Hybrid	80.08	1	N,0;	0
TR1	20520	94.06	1199.49	1199.49	4	2.09278	Q95604	1C17_HUMAN	HLA class I histocompatibility antigen, Cw-17 alpha chain	107	121	GYYNQSEAGSHTIQR	G1dEN4GlcNAc	110	N7H9F1S0	01Y41Y41M(31M41Y41L)61M(21Y(31F)41L31Y41L31L)61Y41L31Y41L	Complex	79.96	1	N,0;	0
TR1	20520	94.06	1199.49	1199.49	4	2.09278	P30501	1C02_HUMAN	HLA class I histocompatibility antigen, Cw-2 alpha chain	107	121	GYYNQSEAGSHTLQR	G1dEN4GlcNAc	110	N7H9F1S0	01Y41Y41M(31M41Y41L)61M(21Y(31F)41L31Y41L31L)61Y41L31Y41L	Complex	79.96	1	N,0;	0
TR1	20520	94.06	1199.49	1199.49	4	2.09278	Q95604	1C17_HUMAN	HLA class I histocompatibility antigen, Cw-17 alpha chain	107	121	GYYNQSEAGSHTIQR	G1dEN4GlcNAc	110	N7H9F1S0	01Y41Y41M(31M(21Y41L31Y41L)41Y41L)61M21Y(31F)41L31Y41L31L	Complex	78.05	1	N,0;	0
TR1	20520	94.06	1199.49	1199.49	4	2.09278	P30501	1C02_HUMAN	HLA class I histocompatibility antigen, Cw-2 alpha chain	107	121	GYYNQSEAGSHTLQR	G1dEN4GlcNAc	110	N7H9F1S0	01Y41Y41M(31M(21Y41L31Y41L)41Y41L)61M21Y(31F)41L31Y41L31L	Complex	78.05	1	N,0;	0
TR2	20509	94.06	1035.69	1035.68	4	9.45161	Q495M3	S36A2_HUMAN	Proton-coupled amino acid transporter 2	469	483	SEDSHPFSNSTTFVR	S1dEN9GlcNAc	477	N4H6F0S2	01Y41Y41M(31M(21Y41L32S)41Y41L32S)61M61M	Hybrid	69.91	1	N,1;	30	03AI2,iII3-3-C/Y,iII2-3-A34/Y,02AII2,02AIII2,BII2,BIII2,BI1,BI2,iII3-3-B/Y,C/Z,iII3-3-B/Z,BII1,BIII1,CII1,CIII1,BI2,35AII4,BII2,BIII2,iII4-5-X14/C,iIII4-5-X14/C,35AII3,35AIII3,BII3,BIII3,iII2-3-B/Y,C/Z,35AII4,YI1,ZII4,ZIII4,iI3II3Y,iI3III3Y,iI4II3Z,iI4III
TR2	20509	94.06	1035.69	1035.67	4	13.6789	P49792	RBP2_HUMAN	E3 SUMO-protein ligase RanBP2	1352	1364	EGSWWHCNSCSLK	E1dEC7CamN8GlcNAcC10CamK13dE	1359	N4H6F0S2	01Y41Y41M(31M(21Y41L32S)41Y41L32S)61M61M	Hybrid	61.07	1	N,0;	27	03AI2,iII3-3-C/Y,iII2-3-A34/Y,02AII2,02AIII2,BII2,BIII2,BI1,BI2,iII3-3-B/Y,C/Z,iII3-3-B/Z,BII1,BIII1,CII1,CIII1,BI2,35AII4,BII2,BIII2,iII4-5-X14/C,iIII4-5-X14/C,35AII3,35AIII3,BII3,BIII3,iII2-3-B/Y,C/Z,35AII4,YI1,ZII4,ZIII4,iI3II3Y,iI3III3Y,iI4II3Y,iI4III
TR3	20612	94.08	1158.82	1158.82	3	2.59724	Q495M3	S36A2_HUMAN	Proton-coupled amino acid transporter 2	469	483	SEDSHPFSNSTTFVR	S1dEN9GlcNAc	477	N2H8F0S0	01Y41Y41M(31M21M21M31G)61M(31M)61M	Mannose	162.6	1	N,0;	0
TR3	20612	94.08	1158.82	1158.82	3	2.59724	Q495M3	S36A2_HUMAN	Proton-coupled amino acid transporter 2	469	483	SEDSHPFSNSTTFVR	S1dEN9GlcNAc	477	N2H8F0S0	01Y41Y41M(31M21M21M)61M(31M21M)61M	Mannose	152.33	1	N,0;	0
TR1	20532	94.12	1204.01	1204	2	6.86158	Q6IN85	P4R3A_HUMAN	Serine/threonine-protein phosphatase 4 regulatory subunit 3A	734	739	TNLSGR	T1dEN2GlcNAc	735	N2H8F0S0	01Y41Y41M(31M21M21M31G)61M(31M)61M	Mannose	99.47	1	N,0;	0
TR1	20532	94.12	1204.01	1204	2	6.86158	Q9Y2P8	RCL1_HUMAN	RNA 3'-terminal phosphate cyclase-like protein	58	63	ITNGSR	I1dEN3GlcNAc	60	N2H8F0S0	01Y41Y41M(31M21M21M31G)61M(31M)61M	Mannose	97.47	1	N,0;	0
TR1	20532	94.12	1204.01	1204	2	6.86158	O75197	LRP5_HUMAN	Low-density lipoprotein receptor-related protein 5	445	450	LNGTSR	L1dEN2GlcNAc	446	N2H8F0S0	01Y41Y41M(31M21M21M31G)61M(31M)61M	Mannose	97.47	1	N,0;	0
TR1	20532	94.12	1204.01	1204	2	6.86158	P07998	RNAS1_HUMAN	Ribonuclease pancreatic	114	119	LTNGSR	L1dEN3GlcNAc	116	N2H8F0S0	01Y41Y41M(31M21M21M31G)61M(31M)61M	Mannose	97.47	1	N,0;	0
TR2	20524	94.14	1031.18	1031.18	4	-0.0884605	Q95604	1C17_HUMAN	HLA class I histocompatibility antigen, Cw-17 alpha chain	107	121	GYYNQSEAGSHTIQR	G1dEN4GlcNAc	110	N6H7F0S0	01Y41Y41M(31M41Y41L)61M(21Y41L31Y41L)61Y41L	Complex	155.11	1	N,1;	0
TR2	20524	94.14	1031.18	1031.18	4	-0.0884605	P30501	1C02_HUMAN	HLA class I histocompatibility antigen, Cw-2 alpha chain	107	121	GYYNQSEAGSHTLQR	G1dEN4GlcNAc	110	N6H7F0S0	01Y41Y41M(31M41Y41L)61M(21Y41L31Y41L)61Y41L	Complex	155.11	1	N,1;	0
TR2	20524	94.14	1030.68	1030.68	4	1.21988	Q95604	1C17_HUMAN	HLA class I histocompatibility antigen, Cw-17 alpha chain	107	121	GYYNQSEAGSHTIQR	G1dEN4GlcNAc	110	N4H5F1S2	01Y(61F)41Y41M(31M)61M(21Y41L32S)61Y41L32S	Complex	154.85	1	N,1;	1	iI4-4-X01/B,
TR2	20524	94.14	1030.68	1030.68	4	1.21988	P30501	1C02_HUMAN	HLA class I histocompatibility antigen, Cw-2 alpha chain	107	121	GYYNQSEAGSHTLQR	G1dEN4GlcNAc	110	N4H5F1S2	01Y(61F)41Y41M(31M)61M(21Y41L32S)61Y41L32S	Complex	154.85	1	N,1;	1	iI4-4-X01/B,
TR2	20524	94.14	1031.43	1031.43	4	-0.463441	P39086	GRIK1_HUMAN	Glutamate receptor ionotropic, kainate 1	813	825	WWRGNGCPEEDNK	W1dEN5GlcNAcC7CamK13dE	817	N6H7F0S0	01Y41Y41M(31M41Y41L)61M(21Y41L31Y41L)61Y41L	Complex	72.45	1	N,0;	0
TR2	20524	94.14	1031.43	1031.43	4	-0.463441	P39086	GRIK1_HUMAN	Glutamate receptor ionotropic, kainate 1	813	825	WWRGNGCPEEDNK	W1dEN5GlcNAcC7CamK13dE	817	N6H7F0S0	01Y41Y41M(31M(21Y41L31Y41L)41Y41L)(41Y)61M61M	Hybrid	64.37	1	N,0;	0
TR2	20529	94.16	918.095	918.088	3	7.68199	P15144	AMPN_HUMAN	Aminopeptidase N	126	136	KLNYTLSQGHR	K1dEN3GlcNAc	128	N2H6F0S0	01Y41Y41M(31M21M)61M(31M)61M	Mannose	147.2	1	N,0;	1	iI2-3-B/Y,C/Z,
TR2	20529	94.16	918.095	918.088	3	7.68199	P15144	AMPN_HUMAN	Aminopeptidase N	126	136	KLNYTLSQGHR	K1dEN3GlcNAc	128	N2H6F0S0	01Y41Y41M(31M)61M(31M21M)61M	Mannose	144.61	1	N,0;	4	iI2-3-X15/C,iI2-3-X35/B,iI2-3-X45/C,iI2-3-B/Y,C/Z,
TR3	20633	94.19	1277.87	1277.87	3	2.54447	Q95604	1C17_HUMAN	HLA class I histocompatibility antigen, Cw-17 alpha chain	107	121	GYYNQSEAGSHTIQR	G1dEN4GlcNAc	110	N4H5F1S1	01Y41Y41M(31M(21Y41L32S)41Y31F)61M61M	Hybrid	98.06	1	N,0;	2	iII4III6Z,ZII4,
TR3	20633	94.19	1277.87	1277.87	3	2.54447	P30501	1C02_HUMAN	HLA class I histocompatibility antigen, Cw-2 alpha chain	107	121	GYYNQSEAGSHTLQR	G1dEN4GlcNAc	110	N4H5F1S1	01Y41Y41M(31M(21Y41L32S)41Y31F)61M61M	Hybrid	98.06	1	N,0;	2	iII4III6Z,ZII4,
TR3	20633	94.19	1277.87	1277.87	3	2.54447	Q95604	1C17_HUMAN	HLA class I histocompatibility antigen, Cw-17 alpha chain	107	121	GYYNQSEAGSHTIQR	G1dEN4GlcNAc	110	N4H5F1S1	01Y41Y41M(31M(21Y(31F)41L32S)41Y)61M61M	Hybrid	95.27	2	N,0;	0
TR3	20633	94.19	1277.87	1277.87	3	2.54447	Q95604	1C17_HUMAN	HLA class I histocompatibility antigen, Cw-17 alpha chain	107	121	GYYNQSEAGSHTIQR	G1dEN4GlcNAc	110	N4H5F1S1	01Y41Y41M(31M)61M(21Y(31F)41L32S)61Y41L	Complex	95.27	2	N,0;	0
TR3	20633	94.19	1277.87	1277.87	3	2.54447	P30501	1C02_HUMAN	HLA class I histocompatibility antigen, Cw-2 alpha chain	107	121	GYYNQSEAGSHTLQR	G1dEN4GlcNAc	110	N4H5F1S1	01Y41Y41M(31M(21Y(31F)41L32S)41Y)61M61M	Hybrid	95.27	2	N,0;	0
TR3	20633	94.19	1277.87	1277.87	3	2.54447	P30501	1C02_HUMAN	HLA class I histocompatibility antigen, Cw-2 alpha chain	107	121	GYYNQSEAGSHTLQR	G1dEN4GlcNAc	110	N4H5F1S1	01Y41Y41M(31M)61M(21Y(31F)41L32S)61Y41L	Complex	95.27	2	N,0;	0
TR2	20554	94.29	1193.51	1193.51	3	2.46059	Q06787-2	FMR1_HUMAN	Isoform 1 of Synaptic functional regulator FMR1	550	566	GRTTDGSLQNTSSEGSR	G1dEN10GlcNAc	559	N4H5F1S0	01Y(61F)41Y41M(31M41Y41L)61M61Y41L	Complex	101.44	1	N,1;	0
TR2	20554	94.29	1193.51	1193.51	3	2.46059	Q06787-2	FMR1_HUMAN	Isoform 1 of Synaptic functional regulator FMR1	550	566	GRTTDGSLQNTSSEGSR	G1dEN10GlcNAc	559	N4H5F1S0	01Y41Y41M(31M41Y(31F)41L)61M61Y41L	Complex	74.46	1	N,1;	0
TR2	20564	94.34	1373.9	1373.9	3	2.73244	Q95604	1C17_HUMAN	HLA class I histocompatibility antigen, Cw-17 alpha chain	107	121	GYYNQSEAGSHTIQR	G1dEN4GlcNAc	110	N4H5F1S2	01Y(61F)41Y41M(31M41Y41L32S)61M61Y41L32S	Complex	199.18	1	N,1;	2	iI3-3-X25/B,iI3-3-X35/B,
TR2	20564	94.34	1373.9	1373.9	3	2.73244	P30501	1C02_HUMAN	HLA class I histocompatibility antigen, Cw-2 alpha chain	107	121	GYYNQSEAGSHTLQR	G1dEN4GlcNAc	110	N4H5F1S2	01Y(61F)41Y41M(31M41Y41L32S)61M61Y41L32S	Complex	199.18	1	N,1;	2	iI3-3-X25/B,iI3-3-X35/B,
TR2	20564	94.34	1375.58	1375.58	3	-1.32644	Q95604	1C17_HUMAN	HLA class I histocompatibility antigen, Cw-17 alpha chain	107	121	GYYNQSEAGSHTIQR	G1dEN4GlcNAc	110	N4H5F3S1	01Y41Y41M(31M21Y(31F)41L21F)61M21Y(31F)41L32S	Complex	90.74	1	N,0;	6	YI1,YI2,iI3II4Z,iI4II3Z,iI4II4Z,YI1,24XI2,
TR2	20564	94.34	1375.58	1375.58	3	-1.32644	P30501	1C02_HUMAN	HLA class I histocompatibility antigen, Cw-2 alpha chain	107	121	GYYNQSEAGSHTLQR	G1dEN4GlcNAc	110	N4H5F3S1	01Y41Y41M(31M21Y(31F)41L21F)61M21Y(31F)41L32S	Complex	90.74	1	N,0;	6	YI1,YI2,iI3II4Z,iI4II3Z,iI4II4Z,YI1,24XI2,
TR2	20564	94.34	1375.58	1375.58	3	-1.32644	Q95604	1C17_HUMAN	HLA class I histocompatibility antigen, Cw-17 alpha chain	107	121	GYYNQSEAGSHTIQR	G1dEN4GlcNAc	110	N4H5F3S1	01Y(61F)41Y41M(31M)61M(21Y(31F)41L32S)61Y(31F)41L	Complex	85.01	1	N,0;	2	iI2-3-X45/C,iI2-3-A03/Z,
TR2	20564	94.34	1375.58	1375.58	3	-1.32644	P30501	1C02_HUMAN	HLA class I histocompatibility antigen, Cw-2 alpha chain	107	121	GYYNQSEAGSHTLQR	G1dEN4GlcNAc	110	N4H5F3S1	01Y(61F)41Y41M(31M)61M(21Y(31F)41L32S)61Y(31F)41L	Complex	85.01	1	N,0;	2	iI2-3-X45/C,iI2-3-A03/Z,
TR1	20604	94.48	1204	1204	2	3.21164	O75197	LRP5_HUMAN	Low-density lipoprotein receptor-related protein 5	445	450	LNGTSR	L1dEN2GlcNAc	446	N2H8F0S0	01Y41Y41M(31M21M)61M(31M21M)61M21M	Mannose	114.16	1	N,0;	1	iI2-3-B/Y,C/Z,
TR1	20604	94.48	1204	1204	2	3.21164	O75197	LRP5_HUMAN	Low-density lipoprotein receptor-related protein 5	445	450	LNGTSR	L1dEN2GlcNAc	446	N2H8F0S0	01Y41Y41M(31M21M21M)61M(31M21M)61M	Mannose	111.77	1	N,0;	0
TR3	20717	94.61	965.775	965.777	3	-1.11655	Q96NR8	RDH12_HUMAN	Retinol dehydrogenase 12	303	314	LWNVSCELLGIR	L1dEN3GlcNAcC6Cam	305	N2H6F0S0	01Y41Y41M(31M)61M(31M21M)61M	Mannose	113.08	1	N,1;	4	iI2-3-X15/C,iI2-3-X35/B,iI2-3-X45/C,iI2-3-B/Y,C/Z,
TR3	20717	94.61	965.775	965.777	3	-1.11655	Q96NR8	RDH12_HUMAN	Retinol dehydrogenase 12	303	314	LWNVSCELLGIR	L1dEN3GlcNAcC6Cam	305	N2H6F0S0	01Y41Y41M(31M21M)61M(31M)61M	Mannose	110.56	1	N,1;	1	iI2-3-B/Y,C/Z,
TR3	20747	94.77	1495.95	1495.95	3	-1.39574	Q95604	1C17_HUMAN	HLA class I histocompatibility antigen, Cw-17 alpha chain	107	121	GYYNQSEAGSHTIQR	G1dEN4GlcNAc	110	N5H6F3S1	01Y41Y41M(31M41Y(31F)41L)61M21Y(31F)41L31Y(31F)41L32S	Complex	59.74	1	N,0;	0
TR3	20747	94.77	1495.95	1495.95	3	-1.39574	P30501	1C02_HUMAN	HLA class I histocompatibility antigen, Cw-2 alpha chain	107	121	GYYNQSEAGSHTLQR	G1dEN4GlcNAc	110	N5H6F3S1	01Y41Y41M(31M41Y(31F)41L)61M21Y(31F)41L31Y(31F)41L32S	Complex	59.74	1	N,0;	0
TR2	20652	94.78	982.119	982.126	3	-7.53738	Q9H611	PIF1_HUMAN	ATP-dependent DNA helicase PIF1	486	498	NLSVSRGLVNGAR	N1GlcNAc@dE	486	N2H7F0S0	01Y41Y41M(31M21M)61M(31M21M)61M	Mannose	104.87	1	N,0;	1	iI2-3-B/Y,C/Z,
TR2	20652	94.78	982.119	982.126	3	-7.53738	Q9H611	PIF1_HUMAN	ATP-dependent DNA helicase PIF1	486	498	NLSVSRGLVNGAR	N1GlcNAc@dE	486	N2H7F0S0	01Y41Y41M(31M)61M(31M21M)61M21M	Mannose	100.15	1	N,0;	4	iI2-3-X15/C,iI2-3-X35/B,iI2-3-X45/C,iI2-3-B/Y,C/Z,
TR2	20652	94.78	982.454	982.444	3	9.37181	Q14566	MCM6_HUMAN	DNA replication licensing factor MCM6	518	529	QNINLSAPIMSR	Q1dEN4GlcNAc	521	N2H7F0S0	01Y41Y41M(31M)61M(31M21M)61M21M	Mannose	75.04	1	N,0;	4	iI2-3-X15/C,iI2-3-X35/B,iI2-3-X45/C,iI2-3-B/Y,C/Z,
TR2	20652	94.78	982.454	982.444	3	9.37181	Q14566	MCM6_HUMAN	DNA replication licensing factor MCM6	518	529	QNINLSAPIMSR	Q1dEN4GlcNAc	521	N2H7F0S0	01Y41Y41M(31M21M21M)61M(31M)61M	Mannose	70.61	1	N,0;	1	iI2-3-B/Y,C/Z,iIII2-3-B/Y,C/Z,
TR1	20687	94.89	784.632	784.638	4	-7.50686	O43508-2	TNF12_HUMAN	Isoform TWE-PRIL of Tumor necrosis factor ligand superfamily member 12	194	208	QHSVLHLVPINATSK	Q1dEN11GlcNAcK15dE	204	N2H6F0S0	01Y41Y41M(31M21M)61M(31M)61M	Mannose	163.5	1	N,1;	4	iI2-3-A34/Y,iI2-3-A25/Z,iI2-3-A34/Y,iI2-3-B/Y,C/Z,
TR1	20687	94.89	784.632	784.637	4	-7.09904	Q9BZF9	UACA_HUMAN	Uveal autoantigen with coiled-coil domains and ankyrin repeats	1123	1136	SLNGTIENLKEELK	S1dEN3GlcNAcK10dEK14dE	1125	N2H6F0S0	01Y41Y41M(31M21M)61M(31M)61M	Mannose	161.23	1	N,3;	4	iI2-3-A34/Y,iI2-3-A25/Z,iI2-3-A34/Y,iI2-3-B/Y,C/Z,
TR1	20687	94.89	784.632	784.638	4	-7.50686	O43508-2	TNF12_HUMAN	Isoform TWE-PRIL of Tumor necrosis factor ligand superfamily member 12	194	208	QHSVLHLVPINATSK	Q1dEN11GlcNAcK15dE	204	N2H6F0S0	01Y41Y41M(31M)61M(31M21M)61M	Mannose	151.45	1	N,1;	4	iI2-3-X15/C,iI2-3-X35/B,iI2-3-X45/C,iI2-3-B/Y,C/Z,
TR1	20687	94.89	784.632	784.637	4	-7.09904	Q9BZF9	UACA_HUMAN	Uveal autoantigen with coiled-coil domains and ankyrin repeats	1123	1136	SLNGTIENLKEELK	S1dEN3GlcNAcK10dEK14dE	1125	N2H6F0S0	01Y41Y41M(31M)61M(31M21M)61M	Mannose	149.15	1	N,3;	4	iI2-3-X15/C,iI2-3-X35/B,iI2-3-X45/C,iI2-3-B/Y,C/Z,
TR1	20690	94.9	1041.45	1041.45	2	3.91148	O75197	LRP5_HUMAN	Low-density lipoprotein receptor-related protein 5	445	450	LNGTSR	L1dEN2GlcNAc	446	N2H6F0S0	01Y41Y41M(31M)61M(31M21M)61M	Mannose	69.58	1	N,0;	1	iI2-3-B/Y,C/Z,
TR1	20690	94.9	1041.45	1041.45	2	3.91148	Q8IVH8	M4K3_HUMAN	Mitogen-activated protein kinase kinase kinase kinase 3	517	522	GTNLSR	G1dEN3GlcNAc	519	N2H6F0S0	01Y41Y41M(31M)61M(31M21M)61M	Mannose	67.63	1	N,0;	1	iI2-3-B/Y,C/Z,
TR1	20690	94.9	1041.45	1041.45	2	3.91148	Q9Y2P8	RCL1_HUMAN	RNA 3'-terminal phosphate cyclase-like protein	58	63	ITNGSR	I1dEN3GlcNAc	60	N2H6F0S0	01Y41Y41M(31M)61M(31M21M)61M	Mannose	67.63	1	N,0;	1	iI2-3-B/Y,C/Z,
TR1	20690	94.9	1041.45	1041.45	2	3.91148	P07998	RNAS1_HUMAN	Ribonuclease pancreatic	114	119	LTNGSR	L1dEN3GlcNAc	116	N2H6F0S0	01Y41Y41M(31M)61M(31M21M)61M	Mannose	67.63	1	N,0;	1	iI2-3-B/Y,C/Z,
TR1	20690	94.9	1041.45	1041.45	2	3.91148	O75197	LRP5_HUMAN	Low-density lipoprotein receptor-related protein 5	445	450	LNGTSR	L1dEN2GlcNAc	446	N2H6F0S0	01Y41Y41M(31M21M)61M(31M)61M	Mannose	64.89	1	N,0;	1	iI2-3-B/Y,C/Z,
TR1	20690	94.9	1041.45	1041.45	2	3.91148	Q8IVH8	M4K3_HUMAN	Mitogen-activated protein kinase kinase kinase kinase 3	517	522	GTNLSR	G1dEN3GlcNAc	519	N2H6F0S0	01Y41Y41M(31M21M)61M(31M)61M	Mannose	62.94	1	N,0;	1	iI2-3-B/Y,C/Z,
TR1	20690	94.9	1041.45	1041.45	2	3.91148	Q9Y2P8	RCL1_HUMAN	RNA 3'-terminal phosphate cyclase-like protein	58	63	ITNGSR	I1dEN3GlcNAc	60	N2H6F0S0	01Y41Y41M(31M21M)61M(31M)61M	Mannose	62.94	1	N,0;	1	iI2-3-B/Y,C/Z,
TR1	20690	94.9	1041.45	1041.45	2	3.91148	P07998	RNAS1_HUMAN	Ribonuclease pancreatic	114	119	LTNGSR	L1dEN3GlcNAc	116	N2H6F0S0	01Y41Y41M(31M21M)61M(31M)61M	Mannose	62.94	1	N,0;	1	iI2-3-B/Y,C/Z,
TR2	20681	94.93	1063.46	1063.46	3	0.700501	Q9BQ50	TREX2_HUMAN	Three prime repair exonuclease 2	35	49	TCYPRGNITMSEAPR	T1dEC2CamN7GlcNAc	41	N2H6F0S0	01Y41Y41M(31M)61M(31M21M)61M	Mannose	129.26	2	N,1;	4	iI2-3-X15/C,iI2-3-X35/B,iI2-3-X45/C,iI2-3-B/Y,C/Z,
TR2	20681	94.93	1063.46	1063.46	3	0.700501	Q9BQ50	TREX2_HUMAN	Three prime repair exonuclease 2	35	49	TCYPRGNITMSEAPR	T1dEC2CamN7GlcNAc	41	N2H6F0S0	01Y41Y41M(31M21M)61M(31M)61M	Mannose	129.26	2	N,1;	2	iI2-3-A34/Y,iI2-3-B/Y,C/Z,
TR2	20681	94.93	1063.8	1063.79	3	2.37742	Q6P5Z2	PKN3_HUMAN	Serine/threonine-protein kinase N3	122	137	QGAENMTHTCASGTPK	Q1dEN5GlcNAcC10CamK16dE	126	N2H6F0S0	01Y41Y41M(31M21M)61M(31M)61M	Mannose	72.31	1	N,1;	2	iI2-3-A34/Y,iI2-3-B/Y,C/Z,
TR2	20681	94.93	1063.8	1063.79	3	2.37742	Q6P5Z2	PKN3_HUMAN	Serine/threonine-protein kinase N3	122	137	QGAENMTHTCASGTPK	Q1dEN5GlcNAcC10CamK16dE	126	N2H6F0S0	01Y41Y41M(31M)61M(31M21M)61M	Mannose	60.5	1	N,1;	4	iI2-3-X15/C,iI2-3-X35/B,iI2-3-X45/C,iI2-3-B/Y,C/Z,
TR1	20702	94.96	1046.18	1046.16	3	14.5603	Q9NX05	F120C_HUMAN	Constitutive coactivator of PPAR-gamma-like protein 2	286	299	NLTTNQFLMQEVAK	N1GlcNAc@dEK14dE	286	N2H6F0S0	01Y41Y41M(31M21M)61M(31M)61M	Mannose	95.09	1	N,0;	2	iI2-3-A34/Y,iI2-3-B/Y,C/Z,
TR1	20702	94.96	1046.18	1046.16	3	14.5603	Q9NX05	F120C_HUMAN	Constitutive coactivator of PPAR-gamma-like protein 2	286	299	NLTTNQFLMQEVAK	N1GlcNAc@dEK14dE	286	N2H6F0S0	01Y41Y41M(31M)61M(31M21M)61M	Mannose	82.92	1	N,0;	4	iI2-3-X15/C,iI2-3-X35/B,iI2-3-X45/C,iI2-3-B/Y,C/Z,
TR3	20800	95.03	1031.18	1031.18	4	1.68723	Q95604	1C17_HUMAN	HLA class I histocompatibility antigen, Cw-17 alpha chain	107	121	GYYNQSEAGSHTIQR	G1dEN4GlcNAc	110	N6H7F0S0	01Y41Y41M(31M)61M(21Y41L31Y41L)61Y41L31Y41L	Complex	131.08	1	N,1;	0
TR3	20800	95.03	1031.18	1031.18	4	1.68723	P30501	1C02_HUMAN	HLA class I histocompatibility antigen, Cw-2 alpha chain	107	121	GYYNQSEAGSHTLQR	G1dEN4GlcNAc	110	N6H7F0S0	01Y41Y41M(31M)61M(21Y41L31Y41L)61Y41L31Y41L	Complex	131.08	1	N,1;	0
TR3	20822	95.14	1276.87	1276.87	3	-1.30189	Q95604	1C17_HUMAN	HLA class I histocompatibility antigen, Cw-17 alpha chain	107	121	GYYNQSEAGSHTIQR	G1dEN4GlcNAc	110	N4H5F1S1	01Y(61F)41Y41M(31M41Y41L32S)(41Y)61M61M	Hybrid	131.48	1	N,0;	0
TR3	20822	95.14	1276.87	1276.87	3	-1.30189	P30501	1C02_HUMAN	HLA class I histocompatibility antigen, Cw-2 alpha chain	107	121	GYYNQSEAGSHTLQR	G1dEN4GlcNAc	110	N4H5F1S1	01Y(61F)41Y41M(31M41Y41L32S)(41Y)61M61M	Hybrid	131.48	1	N,0;	0
TR3	20822	95.14	1276.87	1276.87	3	-2.37013	Q15149	PLEC_HUMAN	Plectin	3648	3661	GFFDPNTHENLTYR	G1dEN10GlcNAc	3657	N4H5F1S1	01Y(61F)41Y41M(31M41Y41L)61M61Y41L32S	Complex	81.62	1	N,2;	1	iI3-4-X45/C,
TR3	20822	95.14	1277.2	1277.2	3	2.06365	P39086	GRIK1_HUMAN	Glutamate receptor ionotropic, kainate 1	813	825	WWRGNGCPEEDNK	W1dEN5GlcNAcC7CamK13dE	817	N4H5F1S1	01Y41Y41M(31M41Y41L)61M21Y(31F)41L32S	Complex	78.48	1	N,1;	0
TR3	20822	95.14	1276.87	1276.87	3	-2.37013	Q15149	PLEC_HUMAN	Plectin	3648	3661	GFFDPNTHENLTYR	G1dEN10GlcNAc	3657	N4H5F1S1	01Y(61F)41Y41M(31M)61M(21Y41L32S)61Y41L	Complex	78.04	1	N,2;	0
TR3	20822	95.14	1277.2	1277.2	3	2.06365	P39086	GRIK1_HUMAN	Glutamate receptor ionotropic, kainate 1	813	825	WWRGNGCPEEDNK	W1dEN5GlcNAcC7CamK13dE	817	N4H5F1S1	01Y41Y41M(31M)61M(21Y41L32S)61Y(31F)41L	Complex	77.21	1	N,1;	0
TR3	20823	95.15	972.11	972.106	3	4.77056	P15144	AMPN_HUMAN	Aminopeptidase N	126	136	KLNYTLSQGHR	K1dEN3GlcNAc	128	N2H7F0S0	01Y41Y41M(31M21M)61M(31M21M)61M	Mannose	180.03	1	N,0;	1	iI2-3-B/Y,C/Z,
TR3	20823	95.15	972.11	972.106	3	4.77056	P15144	AMPN_HUMAN	Aminopeptidase N	126	136	KLNYTLSQGHR	K1dEN3GlcNAc	128	N2H7F0S0	01Y41Y41M(31M)61M(31M21M)61M21M	Mannose	177.43	1	N,0;	4	iI2-3-X15/C,iI2-3-X35/B,iI2-3-X45/C,iI2-3-B/Y,C/Z,
TR3	20887	95.47	910.443	910.444	3	-0.907108	Q63HN8	RN213_HUMAN	E3 ubiquitin-protein ligase RNF213	1070	1080	ILANVTEDAKR	I1dEN4GlcNAcK10dE	1073	N2H6F0S0	01Y41Y41M(31M21M)61M(31M)61M	Mannose	64.11	1	N,0;	2	iI2-3-A34/Y,iI2-3-B/Y,C/Z,
TR3	20887	95.47	910.443	910.444	3	-0.907108	Q63HN8	RN213_HUMAN	E3 ubiquitin-protein ligase RNF213	1070	1080	ILANVTEDAKR	I1dEN4GlcNAcK10dE	1073	N2H6F0S0	01Y41Y41M(31M)61M(31M21M)61M	Mannose	55.39	1	N,0;	4	iI2-3-X15/C,iI2-3-X35/B,iI2-3-X45/C,iI2-3-B/Y,C/Z,
TR2	20796	95.51	1204.01	1204	2	5.03661	Q3KNS6	ZN829_HUMAN	Zinc finger protein 829	392	397	GSNLTR	G1dEN3GlcNAc	394	N2H8F0S0	01Y41Y41M(31M21M21M31G)61M(31M)61M	Mannose	140.23	1	N,0;	0
TR2	20796	95.51	1204.01	1204	2	5.03661	Q8IVH8	M4K3_HUMAN	Mitogen-activated protein kinase kinase kinase kinase 3	517	522	GTNLSR	G1dEN3GlcNAc	519	N2H8F0S0	01Y41Y41M(31M21M21M31G)61M(31M)61M	Mannose	140.23	1	N,0;	0
TR1	20818	95.54	927.77	927.776	3	-5.97066	Q16587	ZNF74_HUMAN	Zinc finger protein 74	632	643	AGRNFSLGSKPR	A1dEN4GlcNAcK10dE	635	N2H6F0S0	01Y41Y41M(31M)61M(31M21M)61M	Mannose	105.67	2	N,1;	4	iI2-3-X15/C,iI2-3-X35/B,iI2-3-X45/C,iI2-3-B/Y,C/Z,
TR1	20818	95.54	927.77	927.776	3	-5.97066	Q16587	ZNF74_HUMAN	Zinc finger protein 74	632	643	AGRNFSLGSKPR	A1dEN4GlcNAcK10dE	635	N2H6F0S0	01Y41Y41M(31M21M)61M(31M)61M	Mannose	105.67	2	N,1;	2	iI2-3-A34/Y,iI2-3-B/Y,C/Z,
TR2	20837	95.71	784.632	784.632	4	-0.011326	Q92765	SFRP3_HUMAN	Secreted frizzled-related protein 3	40	52	IPLCKSLPWNMTK	I1dEC4CamK5dEN10GlcNAcK13dE	49	N2H6F0S0	01Y41Y41M(31M21M)61M(31M)61M	Mannose	209.18	1	N,2;	5	iI2-3-A34/Y,iI2-3-A24/Z,iI2-3-A25/Z,iI2-3-A34/Y,iI2-3-B/Y,C/Z,
TR2	20837	95.71	784.632	784.632	4	-0.011326	Q92765	SFRP3_HUMAN	Secreted frizzled-related protein 3	40	52	IPLCKSLPWNMTK	I1dEC4CamK5dEN10GlcNAcK13dE	49	N2H6F0S0	01Y41Y41M(31M)61M(31M21M)61M	Mannose	206.7	1	N,2;	4	iI2-3-X15/C,iI2-3-X35/B,iI2-3-X45/C,iI2-3-B/Y,C/Z,
TR2	20837	95.71	784.632	784.625	4	9.57287	Q9P0Z9	SOX_HUMAN	Peroxisomal sarcosine oxidase	99	112	ENQELKTIQANLSR	E1dEK6dEN11GlcNAc	109	N2H6F0S0	01Y41Y41M(31M)61M(31M21M)61M	Mannose	202.71	1	N,1;	4	iI2-3-X15/C,iI2-3-X35/B,iI2-3-X45/C,iI2-3-B/Y,C/Z,
TR2	20837	95.71	784.632	784.626	4	7.87014	O75113	N4BP1_HUMAN	NEDD4-binding protein 1	652	665	LGNRNITVFVPQWR	L1dEN5GlcNAc	656	N2H6F0S0	01Y41Y41M(31M)61M(31M21M)61M	Mannose	202.71	1	N,1;	4	iI2-3-X15/C,iI2-3-X35/B,iI2-3-X45/C,iI2-3-B/Y,C/Z,
TR2	20837	95.71	784.632	784.625	4	9.57287	Q9P0Z9	SOX_HUMAN	Peroxisomal sarcosine oxidase	99	112	ENQELKTIQANLSR	E1dEK6dEN11GlcNAc	109	N2H6F0S0	01Y41Y41M(31M21M)61M(31M)61M	Mannose	197.79	1	N,1;	5	iI2-3-A34/Y,iI2-3-A24/Z,iI2-3-A25/Z,iI2-3-A34/Y,iI2-3-B/Y,C/Z,
TR2	20837	95.71	784.632	784.626	4	7.87014	O75113	N4BP1_HUMAN	NEDD4-binding protein 1	652	665	LGNRNITVFVPQWR	L1dEN5GlcNAc	656	N2H6F0S0	01Y41Y41M(31M21M)61M(31M)61M	Mannose	197.79	1	N,1;	5	iI2-3-A34/Y,iI2-3-A24/Z,iI2-3-A25/Z,iI2-3-A34/Y,iI2-3-B/Y,C/Z,
TR2	20837	95.71	784.883	784.881	4	2.62779	Q7Z4G4	TRM11_HUMAN	tRNA (guanine(10)-N2)-methyltransferase homolog	112	124	IHTFNKTLTQEEK	I1dEN5GlcNAcK6dEK13dE	116	N2H6F0S0	01Y41Y41M(31M21M)61M(31M)61M	Mannose	170.86	1	N,2;	5	iI2-3-A34/Y,iI2-3-A24/Z,iI2-3-A25/Z,iI2-3-A34/Y,iI2-3-B/Y,C/Z,
TR2	20837	95.71	784.883	784.881	4	2.62779	Q7Z4G4	TRM11_HUMAN	tRNA (guanine(10)-N2)-methyltransferase homolog	112	124	IHTFNKTLTQEEK	I1dEN5GlcNAcK6dEK13dE	116	N2H6F0S0	01Y41Y41M(31M)61M(31M21M)61M	Mannose	168.46	1	N,2;	4	iI2-3-X15/C,iI2-3-X35/B,iI2-3-X45/C,iI2-3-B/Y,C/Z,
TR2	20839	95.72	1030.68	1030.68	4	4.29925	Q95604	1C17_HUMAN	HLA class I histocompatibility antigen, Cw-17 alpha chain	107	121	GYYNQSEAGSHTIQR	G1dEN4GlcNAc	110	N4H5F1S2	01Y41Y41M(31M)61M(21Y(31F)41L32S)61Y41L32S	Complex	107.97	1	N,0;	0
TR2	20839	95.72	1030.68	1030.68	4	4.29925	P30501	1C02_HUMAN	HLA class I histocompatibility antigen, Cw-2 alpha chain	107	121	GYYNQSEAGSHTLQR	G1dEN4GlcNAc	110	N4H5F1S2	01Y41Y41M(31M)61M(21Y(31F)41L32S)61Y41L32S	Complex	107.97	1	N,0;	0
TR3	20954	95.81	1276.87	1276.87	3	2.33096	Q95604	1C17_HUMAN	HLA class I histocompatibility antigen, Cw-17 alpha chain	107	121	GYYNQSEAGSHTIQR	G1dEN4GlcNAc	110	N4H5F1S1	01Y41Y41M(31M41Y41L)61M21Y(31F)41L32S	Complex	82.06	1	N,0;	0
TR3	20954	95.81	1276.87	1276.87	3	2.33096	P30501	1C02_HUMAN	HLA class I histocompatibility antigen, Cw-2 alpha chain	107	121	GYYNQSEAGSHTLQR	G1dEN4GlcNAc	110	N4H5F1S1	01Y41Y41M(31M41Y41L)61M21Y(31F)41L32S	Complex	82.06	1	N,0;	0
TR3	20954	95.81	1276.87	1276.87	3	2.33096	Q95604	1C17_HUMAN	HLA class I histocompatibility antigen, Cw-17 alpha chain	107	121	GYYNQSEAGSHTIQR	G1dEN4GlcNAc	110	N4H5F1S1	01Y41Y41M(31M21Y(31F)41L32S)(41Y)61M61M	Hybrid	74.43	1	N,0;	0
TR3	20954	95.81	1276.87	1276.87	3	2.33096	P30501	1C02_HUMAN	HLA class I histocompatibility antigen, Cw-2 alpha chain	107	121	GYYNQSEAGSHTLQR	G1dEN4GlcNAc	110	N4H5F1S1	01Y41Y41M(31M21Y(31F)41L32S)(41Y)61M61M	Hybrid	74.43	1	N,0;	0
TR1	20896	95.94	745.354	745.35	4	6.35964	Q9NY28	GALT8_HUMAN	Probable polypeptide N-acetylgalactosaminyltransferase 8	80	90	QQENVNSTLKR	Q1dEN6GlcNAcK10dE	85	N2H7F0S0	01Y41Y41M(31M21M21M)61M(31M)61M	Mannose	83.85	1	N,0;	1	iI2-3-X25/C,
TR1	20896	95.94	745.354	745.35	4	6.35964	Q14674	ESPL1_HUMAN	Separin	1330	1341	LNNTSQKGLEGR	L1dEN2GlcNAcK7dE	1331	N2H7F0S0	01Y41Y41M(31M21M21M)61M(31M)61M	Mannose	74.09	1	N,0;	1	iI2-3-X25/C,
TR1	20896	95.94	745.354	745.35	4	6.35964	Q14674	ESPL1_HUMAN	Separin	1330	1341	LNNTSQKGLEGR	L1dEN3GlcNAcK7dE	1332	N2H7F0S0	01Y41Y41M(31M21M21M)61M(31M)61M	Mannose	74.09	1	N,0;	1	iI2-3-X25/C,
TR1	20896	95.94	745.354	745.35	4	6.35964	Q9NY28	GALT8_HUMAN	Probable polypeptide N-acetylgalactosaminyltransferase 8	80	90	QQENVNSTLKR	Q1dEN6GlcNAcK10dE	85	N2H7F0S0	01Y41Y41M(31M21M)61M(31M21M)61M	Mannose	73.81	1	N,0;	0
TR1	20896	95.94	745.354	745.35	4	6.35964	Q14674	ESPL1_HUMAN	Separin	1330	1341	LNNTSQKGLEGR	L1dEN2GlcNAcK7dE	1331	N2H7F0S0	01Y41Y41M(31M21M)61M(31M21M)61M	Mannose	64.05	1	N,0;	0
TR1	20896	95.94	745.354	745.35	4	6.35964	Q14674	ESPL1_HUMAN	Separin	1330	1341	LNNTSQKGLEGR	L1dEN3GlcNAcK7dE	1332	N2H7F0S0	01Y41Y41M(31M21M)61M(31M21M)61M	Mannose	64.05	1	N,0;	0
TR1	20896	95.94	745.606	745.6	4	7.10951	O95302-3	FKBP9_HUMAN	Isoform 3 of Peptidyl-prolyl cis-trans isomerase FKBP9	93	104	VGVNTSPSCRLK	V1dEN4GlcNAcC9CamK12dE	96	N2H7F0S0	01Y41Y41M(31M21M21M)61M(31M)61M	Mannose	56.37	1	N,1;	1	iI2-3-X25/C,
TR1	20896	95.94	745.606	745.6	4	7.10951	O95302-3	FKBP9_HUMAN	Isoform 3 of Peptidyl-prolyl cis-trans isomerase FKBP9	93	104	VGVNTSPSCRLK	V1dEN4GlcNAcC9CamK12dE	96	N2H7F0S0	01Y41Y41M(31M21M)61M(31M21M)61M	Mannose	43.84	1	N,1;	0
TR3	20990	95.99	1171.83	1171.83	3	-0.195601	Q9P2S6	ANKY1_HUMAN	Ankyrin repeat and MYND domain-containing protein 1	660	673	TALHMACEREDDNK	T1dEC7CamN13GlcNAcK14dE	672	N2H8F0S0	01Y41Y41M(31M21M21M31G)61M(31M)61M	Mannose	118.48	1	N,1;	1	25AIII2,
TR3	20990	95.99	1171.83	1171.83	3	-0.195601	Q9P2S6	ANKY1_HUMAN	Ankyrin repeat and MYND domain-containing protein 1	660	673	TALHMACEREDDNK	T1dEC7CamN13GlcNAcK14dE	672	N2H8F0S0	01Y41Y41M(31M21M21M)61M(31M21M)61M	Mannose	111.08	1	N,1;	0
TR3	20999	96.04	1195.74	1195.74	4	2.10058	Q95604	1C17_HUMAN	HLA class I histocompatibility antigen, Cw-17 alpha chain	107	121	GYYNQSEAGSHTIQR	G1dEN4GlcNAc	110	N5H6F1S3	01Y(61F)41Y41M(31M41Y41L32S)61M(21Y41L32S)61Y41L32S	Complex	54.99	1	N,0;	3	iI3-3-X35/C,iI3-3-X25/B,iI3-3-X35/B,
TR3	20999	96.04	1195.74	1195.74	4	2.10058	P30501	1C02_HUMAN	HLA class I histocompatibility antigen, Cw-2 alpha chain	107	121	GYYNQSEAGSHTLQR	G1dEN4GlcNAc	110	N5H6F1S3	01Y(61F)41Y41M(31M41Y41L32S)61M(21Y41L32S)61Y41L32S	Complex	54.99	1	N,0;	3	iI3-3-X35/C,iI3-3-X25/B,iI3-3-X35/B,
TR3	20999	96.04	1195.74	1195.74	4	2.10058	Q95604	1C17_HUMAN	HLA class I histocompatibility antigen, Cw-17 alpha chain	107	121	GYYNQSEAGSHTIQR	G1dEN4GlcNAc	110	N5H6F1S3	01Y41Y41M(31M(21Y(31F)41L32S)41Y41L32S)61M61Y41L32S	Complex	49.82	1	N,0;	0
TR3	20999	96.04	1195.74	1195.74	4	2.10058	P30501	1C02_HUMAN	HLA class I histocompatibility antigen, Cw-2 alpha chain	107	121	GYYNQSEAGSHTLQR	G1dEN4GlcNAc	110	N5H6F1S3	01Y41Y41M(31M(21Y(31F)41L32S)41Y41L32S)61M61Y41L32S	Complex	49.82	1	N,0;	0
TR3	21011	96.1	1195.24	1195.24	4	-0.614777	Q95604	1C17_HUMAN	HLA class I histocompatibility antigen, Cw-17 alpha chain	107	121	GYYNQSEAGSHTIQR	G1dEN4GlcNAc	110	N7H8F0S1	01Y41Y41M(31M(21Y41L31Y41L)41Y41L31Y41L)61M61Y41L32S	Complex	84.39	1	N,0;	0
TR3	21011	96.1	1195.24	1195.24	4	-0.614777	P30501	1C02_HUMAN	HLA class I histocompatibility antigen, Cw-2 alpha chain	107	121	GYYNQSEAGSHTLQR	G1dEN4GlcNAc	110	N7H8F0S1	01Y41Y41M(31M(21Y41L31Y41L)41Y41L31Y41L)61M61Y41L32S	Complex	84.39	1	N,0;	0
TR3	21011	96.1	1195.49	1195.49	4	-1.20977	Q95604	1C17_HUMAN	HLA class I histocompatibility antigen, Cw-17 alpha chain	107	121	GYYNQSEAGSHTIQR	G1dEN4GlcNAc	110	N7H8F2S0	01Y41Y41M(31M41Y(31F)41L31Y41L)61M(21Y(31F)41L31Y41L)61Y41L	Complex	83.55	2	N,0;	0
TR3	21011	96.1	1195.49	1195.49	4	-1.20977	P30501	1C02_HUMAN	HLA class I histocompatibility antigen, Cw-2 alpha chain	107	121	GYYNQSEAGSHTLQR	G1dEN4GlcNAc	110	N7H8F2S0	01Y41Y41M(31M41Y(31F)41L31Y41L)61M(21Y(31F)41L31Y41L)61Y41L	Complex	83.55	2	N,0;	0
TR1	20935	96.13	704.839	704.835	4	6.13078	P14621	ACYP2_HUMAN	Acylphosphatase-2	79	89	TNFSNEKTISK	T1dEN2GlcNAcK7dEK11dE	80	N2H6F0S0	01Y41Y41M(31M)61M(31M21M)61M	Mannose	98.17	1	N,0;	4	iI2-3-X15/C,iI2-3-X35/B,iI2-3-X45/C,iI2-3-B/Y,C/Z,
TR1	20935	96.13	704.839	704.835	4	6.13078	O75112	LDB3_HUMAN	LIM domain-binding protein 3	71	82	SASYNLSLTLQK	S1dEN5GlcNAcK12dE	75	N2H6F0S0	01Y41Y41M(31M)61M(31M21M)61M	Mannose	97.92	1	N,0;	4	iI2-3-X15/C,iI2-3-X35/B,iI2-3-X45/C,iI2-3-B/Y,C/Z,
TR1	20935	96.13	704.839	704.835	4	6.13078	P28069	PIT1_HUMAN	Pituitary-specific positive transcription factor 1	274	285	TSLNQSLFSISK	T1dEN4GlcNAcK12dE	277	N2H6F0S0	01Y41Y41M(31M)61M(31M21M)61M	Mannose	97.92	1	N,1;	4	iI2-3-X15/C,iI2-3-X35/B,iI2-3-X45/C,iI2-3-B/Y,C/Z,
TR1	20935	96.13	704.839	704.835	4	6.13078	P14621	ACYP2_HUMAN	Acylphosphatase-2	79	89	TNFSNEKTISK	T1dEN2GlcNAcK7dEK11dE	80	N2H6F0S0	01Y41Y41M(31M21M)61M(31M)61M	Mannose	93.84	1	N,0;	3	iI2-3-A34/Y,01AI2,iI2-3-A34/Y,
TR1	20935	96.13	704.839	704.835	4	6.13078	O75112	LDB3_HUMAN	LIM domain-binding protein 3	71	82	SASYNLSLTLQK	S1dEN5GlcNAcK12dE	75	N2H6F0S0	01Y41Y41M(31M21M)61M(31M)61M	Mannose	93.59	1	N,0;	3	iI2-3-A34/Y,01AI2,iI2-3-A34/Y,
TR1	20935	96.13	704.839	704.835	4	6.13078	P28069	PIT1_HUMAN	Pituitary-specific positive transcription factor 1	274	285	TSLNQSLFSISK	T1dEN4GlcNAcK12dE	277	N2H6F0S0	01Y41Y41M(31M21M)61M(31M)61M	Mannose	93.59	1	N,1;	3	iI2-3-A34/Y,01AI2,iI2-3-A34/Y,
TR1	20935	96.13	704.839	704.836	4	3.38687	Q9NY28	GALT8_HUMAN	Probable polypeptide N-acetylgalactosaminyltransferase 8	80	90	QQENVNSTLKR	Q1dEN6GlcNAcK10dE	85	N2H6F0S0	01Y41Y41M(31M)61M(31M21M)61M	Mannose	74.95	1	N,0;	4	iI2-3-X15/C,iI2-3-X35/B,iI2-3-X45/C,iI2-3-B/Y,C/Z,
TR1	20935	96.13	704.839	704.836	4	3.38687	Q9NY28	GALT8_HUMAN	Probable polypeptide N-acetylgalactosaminyltransferase 8	80	90	QQENVNSTLKR	Q1dEN6GlcNAcK10dE	85	N2H6F0S0	01Y41Y41M(31M21M)61M(31M)61M	Mannose	70.93	1	N,0;	3	iI2-3-A34/Y,01AI2,iI2-3-A34/Y,
TR1	20935	96.13	704.839	704.84	4	-2.02856	Q8NB50	ZFP62_HUMAN	Zinc finger protein 62 homolog	765	776	AFRNSSGLTVHK	A1dEN4GlcNAcK12dE	768	N2H6F0S0	01Y41Y41M(31M)61M(31M21M)61M	Mannose	58.89	1	N,1;	4	iI2-3-X15/C,iI2-3-X35/B,iI2-3-X45/C,iI2-3-B/Y,C/Z,
TR1	20935	96.13	704.839	704.84	4	-2.02856	Q8NB50	ZFP62_HUMAN	Zinc finger protein 62 homolog	765	776	AFRNSSGLTVHK	A1dEN4GlcNAcK12dE	768	N2H6F0S0	01Y41Y41M(31M21M)61M(31M)61M	Mannose	54.89	1	N,1;	3	iI2-3-A34/Y,01AI2,iI2-3-A34/Y,
TR1	20935	96.13	705.091	705.085	4	8.45367	Q92539	LPIN2_HUMAN	Phosphatidate phosphatase LPIN2	192	205	GAQAARGSSNASLK	G1dEN10GlcNAcK14dE	201	N2H6F0S0	01Y41Y41M(31M)61M(31M21M)61M	Mannose	48.33	1	N,1;	4	iI2-3-X15/C,iI2-3-X35/B,iI2-3-X45/C,iI2-3-B/Y,C/Z,
TR1	20935	96.13	705.091	705.085	4	8.45367	Q92539	LPIN2_HUMAN	Phosphatidate phosphatase LPIN2	192	205	GAQAARGSSNASLK	G1dEN10GlcNAcK14dE	201	N2H6F0S0	01Y41Y41M(31M21M)61M(31M)61M	Mannose	44.54	1	N,1;	3	iI2-3-A34/Y,01AI2,iI2-3-A34/Y,
TR2	20929	96.18	981.453	981.449	3	4.45475	P50607	TUB_HUMAN	Tubby protein homolog	418	428	NTESIIELQNK	N1dEN10GlcNAcK11dE	427	N2H7F0S0	01Y41Y41M(31M21M21M)61M(31M)61M	Mannose	115.38	1	N,0;	0
TR2	20929	96.18	981.453	981.449	3	4.45475	P50607	TUB_HUMAN	Tubby protein homolog	418	428	NTESIIELQNK	N1dEN10GlcNAcK11dE	427	N2H7F0S0	01Y41Y41M(31M21M)61M(31M21M)61M	Mannose	96.4	1	N,0;	0
TR3	21033	96.21	1005.12	1005.12	3	2.82715	Q9Y4L1	HYOU1_HUMAN	Hypoxia up-regulated protein 1	926	940	AEPPLNASASDQGEK	A1dEN6GlcNAcK15dE	931	N2H6F0S0	01Y41Y41M(31M)61M(31M21M)61M	Mannose	114.45	1	N,2;	5	iI2-3-X15/C,iI2-3-X35/B,iI2-3-X45/C,iI2-3-B/Y,C/Z,iI2-3-C/Y,
TR3	21033	96.21	1005.12	1005.12	3	2.82715	Q9Y4L1	HYOU1_HUMAN	Hypoxia up-regulated protein 1	926	940	AEPPLNASASDQGEK	A1dEN6GlcNAcK15dE	931	N2H6F0S0	01Y41Y41M(31M21M)61M(31M)61M	Mannose	110.08	1	N,2;	2	iI2-3-A34/Y,iI2-3-B/Y,C/Z,
TR2	20942	96.24	1041.45	1041.45	2	6.0213	Q3KNS6	ZN829_HUMAN	Zinc finger protein 829	392	397	GSNLTR	G1dEN3GlcNAc	394	N2H6F0S0	01Y41Y41M(31M)61M(31M21M)61M	Mannose	69.71	1	N,0;	1	iI2-3-B/Y,C/Z,
TR2	20942	96.24	1041.45	1041.45	2	6.0213	Q6IN85	P4R3A_HUMAN	Serine/threonine-protein phosphatase 4 regulatory subunit 3A	734	739	TNLSGR	T1dEN2GlcNAc	735	N2H6F0S0	01Y41Y41M(31M)61M(31M21M)61M	Mannose	69.71	1	N,0;	1	iI2-3-B/Y,C/Z,
TR2	20942	96.24	1041.45	1041.45	2	6.0213	Q3KNS6	ZN829_HUMAN	Zinc finger protein 829	392	397	GSNLTR	G1dEN3GlcNAc	394	N2H6F0S0	01Y41Y41M(31M21M)61M(31M)61M	Mannose	67.36	1	N,0;	2	iI2-3-A34/Y,iI2-3-B/Y,C/Z,
TR2	20942	96.24	1041.45	1041.45	2	6.0213	Q6IN85	P4R3A_HUMAN	Serine/threonine-protein phosphatase 4 regulatory subunit 3A	734	739	TNLSGR	T1dEN2GlcNAc	735	N2H6F0S0	01Y41Y41M(31M21M)61M(31M)61M	Mannose	67.36	1	N,0;	2	iI2-3-A34/Y,iI2-3-B/Y,C/Z,
TR1	20980	96.36	738.326	738.321	4	6.18128	P13761	2B17_HUMAN	HLA class II histocompatibility antigen, DRB1-7 beta chain	42	52	YKCHFFNGTER	Y1dEK2dEC3CamN7GlcNAc	48	N2H6F0S0	01Y41Y41M(31M)61M(31M21M)61M	Mannose	97.86	1	N,1;	4	iI2-3-X15/C,iI2-3-X35/B,iI2-3-X45/C,iI2-3-B/Y,C/Z,
TR1	20980	96.36	738.326	738.321	4	6.18128	P13761	2B17_HUMAN	HLA class II histocompatibility antigen, DRB1-7 beta chain	42	52	YKCHFFNGTER	Y1dEK2dEC3CamN7GlcNAc	48	N2H6F0S0	01Y41Y41M(31M21M)61M(31M)61M	Mannose	90.97	1	N,1;	3	iI2-3-A34/Y,iI2-3-A34/Y,iI2-3-B/Y,C/Z,
TR1	20980	96.36	738.571	738.572	4	-1.25397	Q70YC4	TALAN_HUMAN	Talanin	14	24	CWNTERNQTDK	C1dE@CamN7GlcNAcK11dE	20	N2H6F0S0	01Y41Y41M(31M)61M(31M21M)61M	Mannose	62.16	1	N,1;	4	iI2-3-X15/C,iI2-3-X35/B,iI2-3-X45/C,iI2-3-B/Y,C/Z,
TR1	20980	96.36	738.571	738.572	4	-1.29324	P17019	ZN708_HUMAN	Zinc finger protein 708	392	403	TFNYSSNFTNHK	T1dEN3GlcNAcK12dE	394	N2H6F0S0	01Y41Y41M(31M)61M(31M21M)61M	Mannose	61.91	1	N,0;	4	iI2-3-X15/C,iI2-3-X35/B,iI2-3-X45/C,iI2-3-B/Y,C/Z,
TR1	20980	96.36	738.571	738.572	4	-1.29324	P17019	ZN708_HUMAN	Zinc finger protein 708	392	403	TFNYSSNFTNHK	T1dEN7GlcNAcK12dE	398	N2H6F0S0	01Y41Y41M(31M)61M(31M21M)61M	Mannose	61.91	1	N,0;	4	iI2-3-X15/C,iI2-3-X35/B,iI2-3-X45/C,iI2-3-B/Y,C/Z,
TR1	20980	96.36	738.571	738.582	4	-14.7013	O95631	NET1_HUMAN	Netrin-1	427	439	DGVTGITCNRCAK	D1dEC8CamN9GlcNAcC11CamK13dE	435	N2H6F0S0	01Y41Y41M(31M21M)61M(31M)61M	Mannose	60.63	1	N,1;	3	iI2-3-A34/Y,iI2-3-A34/Y,iI2-3-B/Y,C/Z,
TR1	20980	96.36	738.571	738.571	4	-0.159969	O00499	BIN1_HUMAN	Myc box-dependent-interacting protein 1	580	591	CRGVFPENFTER	C1dE@CamN8GlcNAc	587	N2H6F0S0	01Y41Y41M(31M)61M(31M21M)61M	Mannose	59.89	1	N,1;	4	iI2-3-X15/C,iI2-3-X35/B,iI2-3-X45/C,iI2-3-B/Y,C/Z,
TR1	20980	96.36	738.571	738.576	4	-7.49841	P41587	VIPR2_HUMAN	Vasoactive intestinal polypeptide receptor 2	413	426	NGSEGALQFHRGSR	N1GlcNAc@dE	413	N2H6F0S0	01Y41Y41M(31M)61M(31M21M)61M	Mannose	57.42	1	N,0;	4	iI2-3-X15/C,iI2-3-X35/B,iI2-3-X45/C,iI2-3-B/Y,C/Z,
TR1	20980	96.36	738.571	738.57	4	1.45938	O43497	CAC1G_HUMAN	Voltage-dependent T-type calcium channel subunit alpha-1G	517	530	ASPEIQDRDANGSR	A1dEN11GlcNAc	527	N2H6F0S0	01Y41Y41M(31M)61M(31M21M)61M	Mannose	55.88	1	N,1;	4	iI2-3-X15/C,iI2-3-X35/B,iI2-3-X45/C,iI2-3-B/Y,C/Z,
TR1	20980	96.36	738.571	738.572	4	-1.25397	Q70YC4	TALAN_HUMAN	Talanin	14	24	CWNTERNQTDK	C1dE@CamN7GlcNAcK11dE	20	N2H6F0S0	01Y41Y41M(31M21M)61M(31M)61M	Mannose	55.87	1	N,1;	3	iI2-3-A34/Y,iI2-3-A34/Y,iI2-3-B/Y,C/Z,
TR1	20980	96.36	738.571	738.572	4	-1.29324	P17019	ZN708_HUMAN	Zinc finger protein 708	392	403	TFNYSSNFTNHK	T1dEN3GlcNAcK12dE	394	N2H6F0S0	01Y41Y41M(31M21M)61M(31M)61M	Mannose	55.62	1	N,0;	3	iI2-3-A34/Y,iI2-3-A34/Y,iI2-3-B/Y,C/Z,
TR1	20980	96.36	738.571	738.572	4	-1.29324	P17019	ZN708_HUMAN	Zinc finger protein 708	392	403	TFNYSSNFTNHK	T1dEN7GlcNAcK12dE	398	N2H6F0S0	01Y41Y41M(31M21M)61M(31M)61M	Mannose	55.62	1	N,0;	3	iI2-3-A34/Y,iI2-3-A34/Y,iI2-3-B/Y,C/Z,
TR1	20980	96.36	738.571	738.582	4	-14.7013	O95631	NET1_HUMAN	Netrin-1	427	439	DGVTGITCNRCAK	D1dEC8CamN9GlcNAcC11CamK13dE	435	N2H6F0S0	01Y41Y41M(31M)61M(31M21M)61M	Mannose	54.76	1	N,1;	4	iI2-3-X15/C,iI2-3-X35/B,iI2-3-X45/C,iI2-3-B/Y,C/Z,
TR1	20980	96.36	738.571	738.571	4	-0.159969	O00499	BIN1_HUMAN	Myc box-dependent-interacting protein 1	580	591	CRGVFPENFTER	C1dE@CamN8GlcNAc	587	N2H6F0S0	01Y41Y41M(31M21M)61M(31M)61M	Mannose	53.6	1	N,1;	3	iI2-3-A34/Y,iI2-3-A34/Y,iI2-3-B/Y,C/Z,
TR1	20980	96.36	738.571	738.576	4	-7.49841	P41587	VIPR2_HUMAN	Vasoactive intestinal polypeptide receptor 2	413	426	NGSEGALQFHRGSR	N1GlcNAc@dE	413	N2H6F0S0	01Y41Y41M(31M21M)61M(31M)61M	Mannose	53.24	1	N,0;	3	iI2-3-A34/Y,iI2-3-A34/Y,iI2-3-B/Y,C/Z,
TR1	20980	96.36	738.571	738.57	4	1.45938	O43497	CAC1G_HUMAN	Voltage-dependent T-type calcium channel subunit alpha-1G	517	530	ASPEIQDRDANGSR	A1dEN11GlcNAc	527	N2H6F0S0	01Y41Y41M(31M21M)61M(31M)61M	Mannose	49.59	1	N,1;	3	iI2-3-A34/Y,iI2-3-A34/Y,iI2-3-B/Y,C/Z,
TR1	20980	96.36	738.826	738.825	4	1.30021	Q15057	ACAP2_HUMAN	Arf-GAP with coiled-coil, ANK repeat and PH domain-containing protein 2	378	392	SSPSTGSLDSGNESK	S1dEN12GlcNAcK15dE	389	N2H6F0S0	01Y41Y41M(31M)61M(31M21M)61M	Mannose	45.37	1	N,1;	4	iI2-3-X15/C,iI2-3-X35/B,iI2-3-X45/C,iI2-3-B/Y,C/Z,
TR1	20980	96.36	738.571	738.567	4	5.24915	Q9UHF7	TRPS1_HUMAN	Zinc finger transcription factor Trps1	969	982	GSNEEQVNGSPLER	G1dEN8GlcNAc	976	N2H6F0S0	01Y41Y41M(31M)61M(31M21M)61M	Mannose	45.03	1	N,0;	4	iI2-3-X15/C,iI2-3-X35/B,iI2-3-X45/C,iI2-3-B/Y,C/Z,
TR1	20980	96.36	738.571	738.567	4	5.24915	Q9UHF7	TRPS1_HUMAN	Zinc finger transcription factor Trps1	969	982	GSNEEQVNGSPLER	G1dEN8GlcNAc	976	N2H6F0S0	01Y41Y41M(31M21M)61M(31M)61M	Mannose	41.1	1	N,0;	3	iI2-3-A34/Y,iI2-3-A34/Y,iI2-3-B/Y,C/Z,
TR1	20980	96.36	738.826	738.825	4	1.30021	Q15057	ACAP2_HUMAN	Arf-GAP with coiled-coil, ANK repeat and PH domain-containing protein 2	378	392	SSPSTGSLDSGNESK	S1dEN12GlcNAcK15dE	389	N2H6F0S0	01Y41Y41M(31M21M)61M(31M)61M	Mannose	35.4	1	N,1;	3	iI2-3-A34/Y,iI2-3-A34/Y,iI2-3-B/Y,C/Z,
TR1	20996	96.44	1030.17	1030.17	3	-0.562272	P23229	ITA6_HUMAN	Integrin alpha-6	322	333	ANHSGAVVLLKR	A1dEN2GlcNAcK11dE	323	N2H8F0S0	01Y41Y41M(31M21M21M)61M(31M21M)61M	Mannose	76.34	2	N,1;	0
TR1	20996	96.44	1030.17	1030.17	3	-0.562272	P23229	ITA6_HUMAN	Integrin alpha-6	322	333	ANHSGAVVLLKR	A1dEN2GlcNAcK11dE	323	N2H8F0S0	01Y41Y41M(31M21M21M31G)61M(31M)61M	Mannose	76.34	2	N,1;	1	iIII3-3-X12/B,
TR1	20996	96.44	1030.17	1030.17	3	-0.562272	P23229	ITA6_HUMAN	Integrin alpha-6	322	333	ANHSGAVVLLKR	A1dEN2GlcNAcK11dE	323	N2H8F0S0	01Y41Y41M(31M21M)61M(31M21M)61M21M	Mannose	65.53	1	N,1;	2	iI2-3-B/Y,C/Z,iI3-4-X35/C,
TR3	21112	96.61	1204.01	1204	2	5.54354	Q6IN85	P4R3A_HUMAN	Serine/threonine-protein phosphatase 4 regulatory subunit 3A	734	739	TNLSGR	T1dEN2GlcNAc	735	N2H8F0S0	01Y41Y41M(31M21M21M)61M(31M21M)61M	Mannose	146.82	1	N,0;	0
TR3	21112	96.61	1204.01	1204	2	5.54354	Q9Y2P8	RCL1_HUMAN	RNA 3'-terminal phosphate cyclase-like protein	58	63	ITNGSR	I1dEN3GlcNAc	60	N2H8F0S0	01Y41Y41M(31M21M21M)61M(31M21M)61M	Mannose	144.79	1	N,0;	0
TR3	21112	96.61	1204.01	1204	2	5.54354	P07998	RNAS1_HUMAN	Ribonuclease pancreatic	114	119	LTNGSR	L1dEN3GlcNAc	116	N2H8F0S0	01Y41Y41M(31M21M21M)61M(31M21M)61M	Mannose	144.79	1	N,0;	0
TR3	21112	96.61	1204.01	1204	2	5.54354	Q6IN85	P4R3A_HUMAN	Serine/threonine-protein phosphatase 4 regulatory subunit 3A	734	739	TNLSGR	T1dEN2GlcNAc	735	N2H8F0S0	01Y41Y41M(31M21M)61M(31M21M)61M21M	Mannose	144.35	1	N,0;	1	iI2-3-B/Y,C/Z,
TR3	21112	96.61	1204.01	1204	2	5.54354	Q3KNS6	ZN829_HUMAN	Zinc finger protein 829	392	397	GSNLTR	G1dEN3GlcNAc	394	N2H8F0S0	01Y41Y41M(31M21M21M)61M(31M21M)61M	Mannose	142.89	1	N,0;	0
TR3	21112	96.61	1204.01	1204	2	5.54354	Q8IVH8	M4K3_HUMAN	Mitogen-activated protein kinase kinase kinase kinase 3	517	522	GTNLSR	G1dEN3GlcNAc	519	N2H8F0S0	01Y41Y41M(31M21M21M)61M(31M21M)61M	Mannose	142.89	1	N,0;	0
TR3	21112	96.61	1204.01	1204	2	5.54354	Q9Y2P8	RCL1_HUMAN	RNA 3'-terminal phosphate cyclase-like protein	58	63	ITNGSR	I1dEN3GlcNAc	60	N2H8F0S0	01Y41Y41M(31M21M)61M(31M21M)61M21M	Mannose	142.32	1	N,0;	1	iI2-3-B/Y,C/Z,
TR3	21112	96.61	1204.01	1204	2	5.54354	P07998	RNAS1_HUMAN	Ribonuclease pancreatic	114	119	LTNGSR	L1dEN3GlcNAc	116	N2H8F0S0	01Y41Y41M(31M21M)61M(31M21M)61M21M	Mannose	142.32	1	N,0;	1	iI2-3-B/Y,C/Z,
TR3	21112	96.61	1204.01	1204	2	5.54354	Q3KNS6	ZN829_HUMAN	Zinc finger protein 829	392	397	GSNLTR	G1dEN3GlcNAc	394	N2H8F0S0	01Y41Y41M(31M21M)61M(31M21M)61M21M	Mannose	140.42	1	N,0;	1	iI2-3-B/Y,C/Z,
TR3	21112	96.61	1204.01	1204	2	5.54354	Q8IVH8	M4K3_HUMAN	Mitogen-activated protein kinase kinase kinase kinase 3	517	522	GTNLSR	G1dEN3GlcNAc	519	N2H8F0S0	01Y41Y41M(31M21M)61M(31M21M)61M21M	Mannose	140.42	1	N,0;	1	iI2-3-B/Y,C/Z,
TR3	21112	96.61	1205.01	1205	2	5.61224	Q5T9S5	CCD18_HUMAN	Coiled-coil domain-containing protein 18	563	568	ASNSSK	A1dEN3GlcNAcK6dE	565	N2H8F0S0	01Y41Y41M(31M21M21M)61M(31M21M)61M	Mannose	83.38	2	N,0;	0
TR3	21112	96.61	1205.01	1205	2	5.61224	Q5T9S5	CCD18_HUMAN	Coiled-coil domain-containing protein 18	563	568	ASNSSK	A1dEN3GlcNAcK6dE	565	N2H8F0S0	01Y41Y41M(31M21M21M31G)61M(31M)61M	Mannose	83.38	2	N,0;	0
TR3	21112	96.61	1205.01	1205	2	5.61224	Q15223	NECT1_HUMAN	Nectin-1	70	75	STNGSK	S1dEN3GlcNAcK6dE	72	N2H8F0S0	01Y41Y41M(31M21M21M)61M(31M21M)61M	Mannose	83.38	2	N,0;	0
TR3	21112	96.61	1205.01	1205	2	5.61224	Q15223	NECT1_HUMAN	Nectin-1	70	75	STNGSK	S1dEN3GlcNAcK6dE	72	N2H8F0S0	01Y41Y41M(31M21M21M31G)61M(31M)61M	Mannose	83.38	2	N,0;	0
TR3	21112	96.61	1205.01	1205	2	5.61224	Q5T9S5	CCD18_HUMAN	Coiled-coil domain-containing protein 18	563	568	ASNSSK	A1dEN3GlcNAcK6dE	565	N2H8F0S0	01Y41Y41M(31M21M)61M(31M21M)61M21M	Mannose	74.37	1	N,0;	1	iI2-3-B/Y,C/Z,
TR3	21112	96.61	1205.01	1205	2	5.61224	Q15223	NECT1_HUMAN	Nectin-1	70	75	STNGSK	S1dEN3GlcNAcK6dE	72	N2H8F0S0	01Y41Y41M(31M21M)61M(31M21M)61M21M	Mannose	74.37	1	N,0;	1	iI2-3-B/Y,C/Z,
TR3	21113	96.61	785.134	785.126	4	10.8332	Q96L92	SNX27_HUMAN	Sorting nexin-27	293	307	KNSTTDQVYQAIAAK	K1dEN2GlcNAcK15dE	294	N2H6F0S0	01Y41Y41M(31M21M)61M(31M)61M	Mannose	35.56	1	N,0;	4	iI2-3-A34/Y,01AI2,iI2-3-A34/Y,iI2-3-B/Y,C/Z,
TR3	21135	96.72	1030.68	1030.67	4	10.5907	Q95604	1C17_HUMAN	HLA class I histocompatibility antigen, Cw-17 alpha chain	107	121	GYYNQSEAGSHTIQR	G1dEN4GlcNAc	110	N2H12F0S0	01Y41Y41M(31M21M21M31G31G21G)61M(31M21M)61M21M	Mannose	90.32	1	N,0;	6	BIII4,iI4-5-B/Y,C/Z,iII4-5-B/Y,C/Z,iIII4-7-B/Y,C/Z,iIII5-8-B/Y,C/Z,iIII4-7-X12/B,BIII4,iI4-5-B/Y,C/Z,iII4-5-B/Y,C/Z,iIII4-7-B/Y,C/Z,iIII5-8-B/Y,C/Z,04AI4,13AIII6,45XI3,45XI3,
TR3	21135	96.72	1030.68	1030.67	4	10.5907	P30501	1C02_HUMAN	HLA class I histocompatibility antigen, Cw-2 alpha chain	107	121	GYYNQSEAGSHTLQR	G1dEN4GlcNAc	110	N2H12F0S0	01Y41Y41M(31M21M21M31G31G21G)61M(31M21M)61M21M	Mannose	90.32	1	N,0;	6	BIII4,iI4-5-B/Y,C/Z,iII4-5-B/Y,C/Z,iIII4-7-B/Y,C/Z,iIII5-8-B/Y,C/Z,iIII4-7-X12/B,BIII4,iI4-5-B/Y,C/Z,iII4-5-B/Y,C/Z,iIII4-7-B/Y,C/Z,iIII5-8-B/Y,C/Z,04AI4,13AIII6,45XI3,45XI3,
TR1	21075	96.83	1057.86	1057.86	3	3.54643	O00469	PLOD2_HUMAN	Procollagen-lysine,2-oxoglutarate 5-dioxygenase 2	714	728	LTHLHEGLPVKNGTR	L1dEK11dEN12GlcNAc	725	N2H6F0S0	01Y41Y41M(31M21M)61M(31M)61M	Mannose	115.22	1	N,1;	2	iI2-3-A34/Y,iI2-3-B/Y,C/Z,
TR1	21075	96.83	1057.86	1057.86	3	3.54643	O00469	PLOD2_HUMAN	Procollagen-lysine,2-oxoglutarate 5-dioxygenase 2	714	728	LTHLHEGLPVKNGTR	L1dEK11dEN12GlcNAc	725	N2H6F0S0	01Y41Y41M(31M)61M(31M21M)61M	Mannose	100.18	1	N,1;	4	iI2-3-X15/C,iI2-3-X35/B,iI2-3-X45/C,iI2-3-B/Y,C/Z,
TR1	21075	96.83	1057.86	1057.86	3	1.65014	Q9NP56	PDE7B_HUMAN	cAMP-specific 3',5'-cyclic phosphodiesterase 7B	53	67	LLNSTTYSGEIGTKK	L1dEN3GlcNAcK14dEK15dE	55	N2H6F0S0	01Y41Y41M(31M21M)61M(31M)61M	Mannose	99.07	1	N,2;	2	iI2-3-A34/Y,iI2-3-B/Y,C/Z,
TR1	21075	96.83	1057.86	1057.86	3	1.65014	Q9NP56	PDE7B_HUMAN	cAMP-specific 3',5'-cyclic phosphodiesterase 7B	53	67	LLNSTTYSGEIGTKK	L1dEN3GlcNAcK14dEK15dE	55	N2H6F0S0	01Y41Y41M(31M)61M(31M21M)61M	Mannose	84.03	1	N,2;	4	iI2-3-X15/C,iI2-3-X35/B,iI2-3-X45/C,iI2-3-B/Y,C/Z,
TR2	21065	96.86	765.868	765.863	4	6.55464	Q14674	ESPL1_HUMAN	Separin	1330	1341	LNNTSQKGLEGR	L1dEN2GlcNAcK7dE	1331	N4H5F0S0	01Y41Y41M(31M41Y41L)61M61Y41L	Complex	51.91	1	N,0;	0
TR2	21065	96.86	765.868	765.863	4	6.55464	Q14674	ESPL1_HUMAN	Separin	1330	1341	LNNTSQKGLEGR	L1dEN3GlcNAcK7dE	1332	N4H5F0S0	01Y41Y41M(31M41Y41L)61M61Y41L	Complex	51.91	1	N,0;	0
TR3	21217	97.14	1122.98	1122.97	2	4.14261	Q3KNS6	ZN829_HUMAN	Zinc finger protein 829	392	397	GSNLTR	G1dEN3GlcNAc	394	N2H7F0S0	01Y41Y41M(31M21M21M)61M(31M)61M	Mannose	100.35	1	N,0;	1	iI2-3-B/Y,C/Z,iIII2-3-B/Y,C/Z,
TR3	21217	97.14	1122.98	1122.97	2	4.14261	Q6IN85	P4R3A_HUMAN	Serine/threonine-protein phosphatase 4 regulatory subunit 3A	734	739	TNLSGR	T1dEN2GlcNAc	735	N2H7F0S0	01Y41Y41M(31M21M21M)61M(31M)61M	Mannose	100.35	1	N,0;	1	iI2-3-B/Y,C/Z,iIII2-3-B/Y,C/Z,
TR3	21217	97.14	1122.98	1122.97	2	4.14261	Q8IVH8	M4K3_HUMAN	Mitogen-activated protein kinase kinase kinase kinase 3	517	522	GTNLSR	G1dEN3GlcNAc	519	N2H7F0S0	01Y41Y41M(31M21M21M)61M(31M)61M	Mannose	98.39	1	N,0;	1	iI2-3-B/Y,C/Z,iIII2-3-B/Y,C/Z,
TR3	21217	97.14	1122.98	1122.97	2	4.14261	Q9Y2P8	RCL1_HUMAN	RNA 3'-terminal phosphate cyclase-like protein	58	63	ITNGSR	I1dEN3GlcNAc	60	N2H7F0S0	01Y41Y41M(31M21M21M)61M(31M)61M	Mannose	98.39	1	N,0;	1	iI2-3-B/Y,C/Z,iIII2-3-B/Y,C/Z,
TR3	21217	97.14	1122.98	1122.97	2	4.14261	O75197	LRP5_HUMAN	Low-density lipoprotein receptor-related protein 5	445	450	LNGTSR	L1dEN2GlcNAc	446	N2H7F0S0	01Y41Y41M(31M21M21M)61M(31M)61M	Mannose	98.39	1	N,0;	1	iI2-3-B/Y,C/Z,iIII2-3-B/Y,C/Z,
TR3	21217	97.14	1122.98	1122.97	2	4.14261	P07998	RNAS1_HUMAN	Ribonuclease pancreatic	114	119	LTNGSR	L1dEN3GlcNAc	116	N2H7F0S0	01Y41Y41M(31M21M21M)61M(31M)61M	Mannose	98.39	1	N,0;	1	iI2-3-B/Y,C/Z,iIII2-3-B/Y,C/Z,
TR3	21217	97.14	1122.98	1122.97	2	4.14261	Q3KNS6	ZN829_HUMAN	Zinc finger protein 829	392	397	GSNLTR	G1dEN3GlcNAc	394	N2H7F0S0	01Y41Y41M(31M21M)61M(31M21M)61M	Mannose	93.09	1	N,0;	1	iI2-3-B/Y,C/Z,
TR3	21217	97.14	1122.98	1122.97	2	4.14261	Q6IN85	P4R3A_HUMAN	Serine/threonine-protein phosphatase 4 regulatory subunit 3A	734	739	TNLSGR	T1dEN2GlcNAc	735	N2H7F0S0	01Y41Y41M(31M21M)61M(31M21M)61M	Mannose	93.09	1	N,0;	1	iI2-3-B/Y,C/Z,
TR3	21217	97.14	1122.98	1122.97	2	4.14261	Q8IVH8	M4K3_HUMAN	Mitogen-activated protein kinase kinase kinase kinase 3	517	522	GTNLSR	G1dEN3GlcNAc	519	N2H7F0S0	01Y41Y41M(31M21M)61M(31M21M)61M	Mannose	91.13	1	N,0;	1	iI2-3-B/Y,C/Z,
TR3	21217	97.14	1122.98	1122.97	2	4.14261	Q9Y2P8	RCL1_HUMAN	RNA 3'-terminal phosphate cyclase-like protein	58	63	ITNGSR	I1dEN3GlcNAc	60	N2H7F0S0	01Y41Y41M(31M21M)61M(31M21M)61M	Mannose	91.13	1	N,0;	1	iI2-3-B/Y,C/Z,
TR3	21217	97.14	1122.98	1122.97	2	4.14261	O75197	LRP5_HUMAN	Low-density lipoprotein receptor-related protein 5	445	450	LNGTSR	L1dEN2GlcNAc	446	N2H7F0S0	01Y41Y41M(31M21M)61M(31M21M)61M	Mannose	91.13	1	N,0;	1	iI2-3-B/Y,C/Z,
TR3	21217	97.14	1122.98	1122.97	2	4.14261	P07998	RNAS1_HUMAN	Ribonuclease pancreatic	114	119	LTNGSR	L1dEN3GlcNAc	116	N2H7F0S0	01Y41Y41M(31M21M)61M(31M21M)61M	Mannose	91.13	1	N,0;	1	iI2-3-B/Y,C/Z,
TR3	21217	97.14	1122.48	1122.48	2	-4.10952	Q86Y34	AGRG3_HUMAN	Adhesion G protein-coupled receptor G3	140	145	SLPGNR	S1dEN5GlcNAc	144	N2H7F0S0	01Y41Y41M(31M21M21M)61M(31M)61M	Mannose	65.31	1	N,1;	1	iI2-3-B/Y,C/Z,iIII2-3-B/Y,C/Z,
TR3	21217	97.14	1122.48	1122.48	2	-4.10952	Q86Y34	AGRG3_HUMAN	Adhesion G protein-coupled receptor G3	140	145	SLPGNR	S1dEN5GlcNAc	144	N2H7F0S0	01Y41Y41M(31M21M)61M(31M21M)61M	Mannose	58.52	1	N,1;	1	iI2-3-B/Y,C/Z,
TR3	21221	97.16	1290.54	1290.54	3	0.70582	Q06787-2	FMR1_HUMAN	Isoform 1 of Synaptic functional regulator FMR1	550	566	GRTTDGSLQNTSSEGSR	G1dEN10GlcNAc	559	N4H5F1S1	01Y(61F)41Y41M(31M41Y41L)61M61Y41L32S	Complex	96.23	1	N,1;	1	iI3-4-X45/C,
TR3	21221	97.16	1290.54	1290.54	3	0.70582	Q06787-2	FMR1_HUMAN	Isoform 1 of Synaptic functional regulator FMR1	550	566	GRTTDGSLQNTSSEGSR	G1dEN10GlcNAc	559	N4H5F1S1	01Y(61F)41Y41M(31M41Y41L32S)(41Y)61M61M	Hybrid	91.38	1	N,1;	0
TR1	21155	97.21	1299.55	1299.54	2	6.62881	Q00610	CLH1_HUMAN	Clathrin heavy chain 1	1246	1251	KANSTR	K1dEN3GlcNAc	1248	N2H9F0S0	01Y41Y41M(31M21M21M31G31G)61M(31M)61M	Mannose	92.14	1	N,2;	0
TR1	21155	97.21	1299.55	1299.54	2	6.62881	Q00610	CLH1_HUMAN	Clathrin heavy chain 1	1246	1251	KANSTR	K1dEN3GlcNAc	1248	N2H9F0S0	01Y41Y41M(31M21M21M31G)61M(31M21M)61M	Mannose	89.76	1	N,2;	0
TR1	21155	97.21	1300.05	1300.04	2	8.28079	Q8WZ74	CTTB2_HUMAN	Cortactin-binding protein 2	1458	1463	VNTSPR	V1dEN2GlcNAc	1459	N2H9F0S0	01Y41Y41M(31M21M21M31G)61M(31M21M)61M	Mannose	68.64	1	N,0;	0
TR1	21155	97.21	1300.05	1300.04	2	8.28079	Q8WZ74	CTTB2_HUMAN	Cortactin-binding protein 2	1458	1463	VNTSPR	V1dEN2GlcNAc	1459	N2H9F0S0	01Y41Y41M(31M21M21M)61M(31M21M)61M21M	Mannose	66.42	2	N,0;	0
TR1	21155	97.21	1300.05	1300.04	2	8.28079	Q8WZ74	CTTB2_HUMAN	Cortactin-binding protein 2	1458	1463	VNTSPR	V1dEN2GlcNAc	1459	N2H9F0S0	01Y41Y41M(31M21M21M31G31G)61M(31M)61M	Mannose	66.42	2	N,0;	0
TR1	21155	97.21	1300.05	1300.07	2	-13.079	Q9UBE8	NLK_HUMAN	Serine/threonine-protein kinase NLK	470	475	NLSSVR	N1GlcNAc@dE	470	N6H4F0S0	01Y41Y41M(31M)61M(21Y41L31Y41V)61Y	Complex	44.57	1	N,0;	0
TR1	21155	97.21	1300.05	1300.07	2	-13.079	Q9H611	PIF1_HUMAN	ATP-dependent DNA helicase PIF1	486	491	NLSVSR	N1GlcNAc@dE	486	N6H4F0S0	01Y41Y41M(31M)61M(21Y41L31Y41V)61Y	Complex	44.57	1	N,0;	0
TR1	21155	97.21	1300.05	1300.07	2	-13.079	Q7RTR2	NLRC3_HUMAN	NLR family CARD domain-containing protein 3	1000	1005	VNSSLR	V1dEN2GlcNAc	1001	N6H4F0S0	01Y41Y41M(31M)61M(21Y41L31Y41V)61Y	Complex	42.16	1	N,1;	0
TR1	21180	97.33	1218.02	1218.02	2	4.85544	Q9UBE8	NLK_HUMAN	Serine/threonine-protein kinase NLK	470	475	NLSSVR	N1GlcNAc@dE	470	N2H8F0S0	01Y41Y41M(31M21M)61M(31M21M)61M21M	Mannose	156.82	1	N,0;	2	iI2-3-B/Y,C/Z,iI2-3-C/Y,
TR1	21180	97.33	1218.02	1218.02	2	4.85544	Q9H611	PIF1_HUMAN	ATP-dependent DNA helicase PIF1	486	491	NLSVSR	N1GlcNAc@dE	486	N2H8F0S0	01Y41Y41M(31M21M)61M(31M21M)61M21M	Mannose	156.82	1	N,0;	2	iI2-3-B/Y,C/Z,iI2-3-C/Y,
TR1	21180	97.33	1218.02	1218.02	2	4.85544	Q7RTR2	NLRC3_HUMAN	NLR family CARD domain-containing protein 3	1000	1005	VNSSLR	V1dEN2GlcNAc	1001	N2H8F0S0	01Y41Y41M(31M21M)61M(31M21M)61M21M	Mannose	149.82	1	N,2;	2	iI2-3-B/Y,C/Z,iI2-3-C/Y,
TR1	21180	97.33	1218.02	1218.02	2	4.85544	Q9UBE8	NLK_HUMAN	Serine/threonine-protein kinase NLK	470	475	NLSSVR	N1GlcNAc@dE	470	N2H8F0S0	01Y41Y41M(31M21M21M)61M(31M21M)61M	Mannose	149.41	1	N,0;	0
TR1	21180	97.33	1218.02	1218.02	2	4.85544	Q9H611	PIF1_HUMAN	ATP-dependent DNA helicase PIF1	486	491	NLSVSR	N1GlcNAc@dE	486	N2H8F0S0	01Y41Y41M(31M21M21M)61M(31M21M)61M	Mannose	149.41	1	N,0;	0
TR1	21180	97.33	1218.02	1218.02	2	4.85544	Q9Y252	RNF6_HUMAN	E3 ubiquitin-protein ligase RNF6	287	292	SNVTVR	S1dEN2GlcNAc	288	N2H8F0S0	01Y41Y41M(31M21M)61M(31M21M)61M21M	Mannose	143.45	1	N,1;	2	iI2-3-B/Y,C/Z,iI2-3-C/Y,
TR1	21180	97.33	1218.02	1218.02	2	4.85544	Q7RTR2	NLRC3_HUMAN	NLR family CARD domain-containing protein 3	1000	1005	VNSSLR	V1dEN2GlcNAc	1001	N2H8F0S0	01Y41Y41M(31M21M21M)61M(31M21M)61M	Mannose	142.41	1	N,2;	0
TR1	21180	97.33	1218.02	1218.02	2	4.85544	P50851	LRBA_HUMAN	Lipopolysaccharide-responsive and beige-like anchor protein	1215	1220	ATNLTR	A1dEN3GlcNAc	1217	N2H8F0S0	01Y41Y41M(31M21M)61M(31M21M)61M21M	Mannose	139.82	1	N,1;	2	iI2-3-B/Y,C/Z,iI2-3-C/Y,
TR1	21180	97.33	1218.02	1218.02	2	4.85544	O94851	MICA2_HUMAN	[F-actin]-monooxygenase MICAL2	507	512	SVNLSR	S1dEN3GlcNAc	509	N2H8F0S0	01Y41Y41M(31M21M)61M(31M21M)61M21M	Mannose	139.82	1	N,1;	2	iI2-3-B/Y,C/Z,iI2-3-C/Y,
TR1	21180	97.33	1218.02	1218.02	2	4.85544	Q9Y252	RNF6_HUMAN	E3 ubiquitin-protein ligase RNF6	287	292	SNVTVR	S1dEN2GlcNAc	288	N2H8F0S0	01Y41Y41M(31M21M21M)61M(31M21M)61M	Mannose	136.04	1	N,1;	0
TR1	21180	97.33	1218.02	1218.02	2	4.85544	P50851	LRBA_HUMAN	Lipopolysaccharide-responsive and beige-like anchor protein	1215	1220	ATNLTR	A1dEN3GlcNAc	1217	N2H8F0S0	01Y41Y41M(31M21M21M)61M(31M21M)61M	Mannose	132.41	1	N,1;	0
TR1	21180	97.33	1218.02	1218.02	2	4.85544	O94851	MICA2_HUMAN	[F-actin]-monooxygenase MICAL2	507	512	SVNLSR	S1dEN3GlcNAc	509	N2H8F0S0	01Y41Y41M(31M21M21M)61M(31M21M)61M	Mannose	132.41	1	N,1;	0
TR1	21180	97.33	1219.02	1219.02	2	2.62156	O15117	FYB1_HUMAN	FYN-binding protein 1	218	223	NVSSSK	N1GlcNAc@dEK6dE	218	N2H8F0S0	01Y41Y41M(31M21M)61M(31M21M)61M21M	Mannose	78.96	1	N,0;	2	iI2-3-B/Y,C/Z,iI2-3-C/Y,
TR1	21180	97.33	1219.02	1219.02	2	2.62156	O15117	FYB1_HUMAN	FYN-binding protein 1	218	223	NVSSSK	N1GlcNAc@dEK6dE	218	N2H8F0S0	01Y41Y41M(31M21M21M)61M(31M21M)61M	Mannose	74.49	1	N,0;	0
TR2	21178	97.43	1055.53	1055.52	3	9.39862	Q75QN2	INT8_HUMAN	Integrator complex subunit 8	563	576	DNLTRDLVYILMAK	D1dEN2GlcNAcK14dE	564	N2H6F0S0	01Y41Y41M(31M)61M(31M21M)61M	Mannose	176.11	1	N,0;	4	iI2-3-X15/C,iI2-3-X35/B,iI2-3-X45/C,iI2-3-B/Y,C/Z,
TR2	21178	97.43	1055.53	1055.52	3	9.39862	Q75QN2	INT8_HUMAN	Integrator complex subunit 8	563	576	DNLTRDLVYILMAK	D1dEN2GlcNAcK14dE	564	N2H6F0S0	01Y41Y41M(31M21M)61M(31M)61M	Mannose	165.65	1	N,0;	3	iI2-3-A34/Y,iI2-3-A25/Z,iI2-3-B/Y,C/Z,
TR2	21178	97.43	1055.53	1055.51	3	14.2532	Q8N2I2	ZN619_HUMAN	Zinc finger protein 619	88	101	TENEEKTAQLNISK	T1dEK6dEN11GlcNAcK14dE	98	N2H6F0S0	01Y41Y41M(31M)61M(31M21M)61M	Mannose	124.82	1	N,1;	4	iI2-3-X15/C,iI2-3-X35/B,iI2-3-X45/C,iI2-3-B/Y,C/Z,
TR2	21178	97.43	1055.53	1055.51	3	14.2532	Q8N2I2	ZN619_HUMAN	Zinc finger protein 619	88	101	TENEEKTAQLNISK	T1dEK6dEN11GlcNAcK14dE	98	N2H6F0S0	01Y41Y41M(31M21M)61M(31M)61M	Mannose	114.91	1	N,1;	3	iI2-3-A34/Y,iI2-3-A25/Z,iI2-3-B/Y,C/Z,
TR3	21318	97.65	1134.82	1134.82	3	2.24078	P42892	ECE1_HUMAN	Endothelin-converting enzyme 1	162	176	HLLENSTASVSEAER	H1dEN5GlcNAc	166	N2H8F0S0	01Y41Y41M(31M21M21M)61M(31M21M)61M	Mannose	53.27	1	N,1;	0
TR3	21324	97.68	993.468	993.461	3	6.50483	P28069	PIT1_HUMAN	Pituitary-specific positive transcription factor 1	274	285	TSLNQSLFSISK	T1dEN4GlcNAcK12dE	277	N2H7F0S0	01Y41Y41M(31M21M21M)61M(31M)61M	Mannose	113.55	1	N,1;	0
TR3	21324	97.68	993.468	993.461	3	6.50483	P28069	PIT1_HUMAN	Pituitary-specific positive transcription factor 1	274	285	TSLNQSLFSISK	T1dEN4GlcNAcK12dE	277	N2H7F0S0	01Y41Y41M(31M21M)61M(31M21M)61M	Mannose	101.87	1	N,1;	1	iI2-3-B/Y,C/Z,
TR3	21362	97.87	939.787	939.78	3	6.71759	O95302-3	FKBP9_HUMAN	Isoform 3 of Peptidyl-prolyl cis-trans isomerase FKBP9	93	104	VGVNTSPSCRLK	V1dEN4GlcNAcC9CamK12dE	96	N2H6F0S0	01Y41Y41M(31M21M)61M(31M)61M	Mannose	118.76	1	N,0;	2	iI2-3-A34/Y,iI2-3-B/Y,C/Z,
TR3	21362	97.87	939.787	939.78	3	6.71759	O95302-3	FKBP9_HUMAN	Isoform 3 of Peptidyl-prolyl cis-trans isomerase FKBP9	93	104	VGVNTSPSCRLK	V1dEN4GlcNAcC9CamK12dE	96	N2H6F0S0	01Y41Y41M(31M)61M(31M21M)61M	Mannose	106.78	1	N,0;	5	iI2-3-X15/C,iI2-3-X35/B,iI2-3-X45/C,iI2-3-X01/C,iI2-3-B/Y,C/Z,
TR1	21295	97.89	1137	1136.99	2	5.46263	Q9UBE8	NLK_HUMAN	Serine/threonine-protein kinase NLK	470	475	NLSSVR	N1GlcNAc@dE	470	N2H7F0S0	01Y41Y41M(31M21M21M)61M(31M)61M	Mannose	103.29	1	N,0;	1	iI2-3-B/Y,C/Z,iIII2-3-B/Y,C/Z,
TR1	21295	97.89	1137	1136.99	2	5.46263	Q9H611	PIF1_HUMAN	ATP-dependent DNA helicase PIF1	486	491	NLSVSR	N1GlcNAc@dE	486	N2H7F0S0	01Y41Y41M(31M21M21M)61M(31M)61M	Mannose	103.29	1	N,0;	1	iI2-3-B/Y,C/Z,iIII2-3-B/Y,C/Z,
TR1	21295	97.89	1137	1136.99	2	5.46263	Q7RTR2	NLRC3_HUMAN	NLR family CARD domain-containing protein 3	1000	1005	VNSSLR	V1dEN2GlcNAc	1001	N2H7F0S0	01Y41Y41M(31M21M21M)61M(31M)61M	Mannose	96.23	1	N,1;	1	iI2-3-B/Y,C/Z,iIII2-3-B/Y,C/Z,
TR1	21295	97.89	1137	1136.99	2	5.46263	Q9Y252	RNF6_HUMAN	E3 ubiquitin-protein ligase RNF6	287	292	SNVTVR	S1dEN2GlcNAc	288	N2H7F0S0	01Y41Y41M(31M21M21M)61M(31M)61M	Mannose	89.8	1	N,1;	1	iI2-3-B/Y,C/Z,iIII2-3-B/Y,C/Z,
TR1	21295	97.89	1137	1136.99	2	5.46263	P50851	LRBA_HUMAN	Lipopolysaccharide-responsive and beige-like anchor protein	1215	1220	ATNLTR	A1dEN3GlcNAc	1217	N2H7F0S0	01Y41Y41M(31M21M21M)61M(31M)61M	Mannose	87.88	1	N,1;	1	iI2-3-B/Y,C/Z,iIII2-3-B/Y,C/Z,
TR1	21295	97.89	1137	1136.99	2	5.46263	O94851	MICA2_HUMAN	[F-actin]-monooxygenase MICAL2	507	512	SVNLSR	S1dEN3GlcNAc	509	N2H7F0S0	01Y41Y41M(31M21M21M)61M(31M)61M	Mannose	87.88	1	N,1;	1	iI2-3-B/Y,C/Z,iIII2-3-B/Y,C/Z,
TR2	21274	97.91	1218.02	1218.02	2	4.1539	Q9UBE8	NLK_HUMAN	Serine/threonine-protein kinase NLK	470	475	NLSSVR	N1GlcNAc@dE	470	N2H8F0S0	01Y41Y41M(31M21M21M31G)61M(31M)61M	Mannose	119.89	1	N,0;	0
TR2	21274	97.91	1218.02	1218.02	2	4.1539	Q9H611	PIF1_HUMAN	ATP-dependent DNA helicase PIF1	486	491	NLSVSR	N1GlcNAc@dE	486	N2H8F0S0	01Y41Y41M(31M21M21M31G)61M(31M)61M	Mannose	119.89	1	N,0;	0
TR2	21274	97.91	1218.02	1218.02	2	4.1539	Q7RTR2	NLRC3_HUMAN	NLR family CARD domain-containing protein 3	1000	1005	VNSSLR	V1dEN2GlcNAc	1001	N2H8F0S0	01Y41Y41M(31M21M21M31G)61M(31M)61M	Mannose	119.89	1	N,0;	0
TR2	21274	97.91	1218.02	1218.02	2	4.1539	P50851	LRBA_HUMAN	Lipopolysaccharide-responsive and beige-like anchor protein	1215	1220	ATNLTR	A1dEN3GlcNAc	1217	N2H8F0S0	01Y41Y41M(31M21M21M31G)61M(31M)61M	Mannose	110.96	1	N,2;	0
TR2	21274	97.91	1218.02	1218.02	2	4.1539	Q9Y252	RNF6_HUMAN	E3 ubiquitin-protein ligase RNF6	287	292	SNVTVR	S1dEN2GlcNAc	288	N2H8F0S0	01Y41Y41M(31M21M21M31G)61M(31M)61M	Mannose	110.96	1	N,0;	0
TR1	21300	97.91	1021.48	1021.47	3	9.80502	Q14126	DSG2_HUMAN	Desmoglein-2	459	468	YVQNGTYTVK	Y1dEN4GlcNAcK10dE	462	N4H5F1S0	01Y(61F)41Y41M(31M)61M(21Y41L)61Y41L	Complex	58.37	1	N,1;	0
TR1	21336	98.09	745.581	745.588	4	-8.69941	P12259	FA5_HUMAN	Coagulation factor V	377	389	SQHLDNFSNQIGK	S1dEN6GlcNAcK13dE	382	N2H6F0S0	01Y41Y41M(31M21M)61M(31M)61M	Mannose	96.01	1	N,0;	3	iI2-3-A34/Y,iI2-3-A34/Y,04AI3,iI2-3-A24/Y,
TR1	21336	98.09	745.581	745.588	4	-8.69941	P12259	FA5_HUMAN	Coagulation factor V	377	389	SQHLDNFSNQIGK	S1dEN6GlcNAcK13dE	382	N2H6F0S0	01Y41Y41M(31M)61M(31M21M)61M	Mannose	89.22	1	N,0;	4	iI2-3-X15/C,iI2-3-X35/B,iI2-3-X45/C,iI2-3-B/Y,C/Z,
TR3	21409	98.11	704.841	704.836	4	6.67747	Q8NC74	RB8NL_HUMAN	RBBP8 N-terminal-like protein	487	499	SPQALSNGTKGTR	S1dEN7GlcNAcK10dE	493	N2H6F0S0	01Y41Y41M(31M)61M(31M21M)61M	Mannose	40.84	1	N,0;	5	iI2-3-X15/C,iI2-3-X35/B,iI2-3-X45/C,iI2-3-A35/Y,iI2-3-B/Y,C/Z,
TR3	21409	98.11	704.841	704.836	4	6.67747	Q8NC74	RB8NL_HUMAN	RBBP8 N-terminal-like protein	487	499	SPQALSNGTKGTR	S1dEN7GlcNAcK10dE	493	N2H6F0S0	01Y41Y41M(31M21M)61M(31M)61M	Mannose	35.47	1	N,0;	3	iI2-3-A03/Z,iI2-3-A34/Y,iI2-3-A03/Z,
TR1	21346	98.14	1055.47	1055.46	2	5.91765	Q9UBE8	NLK_HUMAN	Serine/threonine-protein kinase NLK	470	475	NLSSVR	N1GlcNAc@dE	470	N2H6F0S0	01Y41Y41M(31M)61M(31M21M)61M	Mannose	109.3	1	N,0;	2	iI2-3-B/Z,iI2-3-B/Y,C/Z,
TR1	21346	98.14	1055.47	1055.46	2	5.91765	Q9H611	PIF1_HUMAN	ATP-dependent DNA helicase PIF1	486	491	NLSVSR	N1GlcNAc@dE	486	N2H6F0S0	01Y41Y41M(31M)61M(31M21M)61M	Mannose	109.3	1	N,0;	2	iI2-3-B/Z,iI2-3-B/Y,C/Z,
TR1	21346	98.14	1055.47	1055.46	2	5.91765	Q9UBE8	NLK_HUMAN	Serine/threonine-protein kinase NLK	470	475	NLSSVR	N1GlcNAc@dE	470	N2H6F0S0	01Y41Y41M(31M21M)61M(31M)61M	Mannose	106.88	1	N,0;	2	iI2-3-A34/Y,iI2-3-B/Y,C/Z,
TR1	21346	98.14	1055.47	1055.46	2	5.91765	Q9H611	PIF1_HUMAN	ATP-dependent DNA helicase PIF1	486	491	NLSVSR	N1GlcNAc@dE	486	N2H6F0S0	01Y41Y41M(31M21M)61M(31M)61M	Mannose	106.88	1	N,0;	2	iI2-3-A34/Y,iI2-3-B/Y,C/Z,
TR1	21346	98.14	1055.47	1055.46	2	5.91765	Q7RTR2	NLRC3_HUMAN	NLR family CARD domain-containing protein 3	1000	1005	VNSSLR	V1dEN2GlcNAc	1001	N2H6F0S0	01Y41Y41M(31M)61M(31M21M)61M	Mannose	102.22	1	N,2;	2	iI2-3-B/Z,iI2-3-B/Y,C/Z,
TR1	21346	98.14	1055.47	1055.46	2	5.91765	Q7RTR2	NLRC3_HUMAN	NLR family CARD domain-containing protein 3	1000	1005	VNSSLR	V1dEN2GlcNAc	1001	N2H6F0S0	01Y41Y41M(31M21M)61M(31M)61M	Mannose	99.8	1	N,2;	2	iI2-3-A34/Y,iI2-3-B/Y,C/Z,
TR1	21346	98.14	1055.47	1055.46	2	5.91765	Q9Y252	RNF6_HUMAN	E3 ubiquitin-protein ligase RNF6	287	292	SNVTVR	S1dEN2GlcNAc	288	N2H6F0S0	01Y41Y41M(31M)61M(31M21M)61M	Mannose	91.78	1	N,1;	2	iI2-3-B/Z,iI2-3-B/Y,C/Z,
TR1	21346	98.14	1055.47	1055.46	2	5.91765	O94851	MICA2_HUMAN	[F-actin]-monooxygenase MICAL2	507	512	SVNLSR	S1dEN3GlcNAc	509	N2H6F0S0	01Y41Y41M(31M)61M(31M21M)61M	Mannose	91.78	1	N,1;	2	iI2-3-B/Z,iI2-3-B/Y,C/Z,
TR1	21346	98.14	1055.47	1055.46	2	5.91765	Q9Y252	RNF6_HUMAN	E3 ubiquitin-protein ligase RNF6	287	292	SNVTVR	S1dEN2GlcNAc	288	N2H6F0S0	01Y41Y41M(31M21M)61M(31M)61M	Mannose	89.36	1	N,1;	2	iI2-3-A34/Y,iI2-3-B/Y,C/Z,
TR1	21346	98.14	1055.47	1055.46	2	5.91765	O94851	MICA2_HUMAN	[F-actin]-monooxygenase MICAL2	507	512	SVNLSR	S1dEN3GlcNAc	509	N2H6F0S0	01Y41Y41M(31M21M)61M(31M)61M	Mannose	89.36	1	N,1;	2	iI2-3-A34/Y,iI2-3-B/Y,C/Z,
TR3	21437	98.25	1112.83	1112.82	3	7.8857	Q12797	ASPH_HUMAN	Aspartyl/asparaginyl beta-hydroxylase	704	715	CANETKTWEEGK	C1dE@CamN3GlcNAcK6dEK12dE	706	N2H8F0S0	01Y41Y41M(31M21M21M31G)61M(31M)61M	Mannose	79.28	1	N,0;	1	25AIII2,
TR3	21437	98.25	1112.83	1112.82	3	7.8857	Q12797	ASPH_HUMAN	Aspartyl/asparaginyl beta-hydroxylase	704	715	CANETKTWEEGK	C1dE@CamN3GlcNAcK6dEK12dE	706	N2H8F0S0	01Y41Y41M(31M21M21M)61M(31M21M)61M	Mannose	74.83	1	N,0;	0
TR1	21370	98.26	1141.18	1141.17	3	5.2762	Q96GR2	ACBG1_HUMAN	Long-chain-fatty-acid--CoA ligase ACSBG1	291	304	GVMLSQDNITWTAR	G1dEN8GlcNAc	298	N4H5F1S0	01Y41Y41M(31M41Y(31F)41L)61M61Y41L	Complex	103.9	1	N,1;	0
TR2	21355	98.32	1218.52	1218.51	2	7.61384	P23193-2	TCEA1_HUMAN	Isoform 2 of Transcription elongation factor A protein 1	19	24	KNASTR	K1dEN2GlcNAc	20	N2H8F0S0	01Y41Y41M(31M21M)61M(31M21M)61M21M	Mannose	107.01	2	N,3;	1	iI2-3-B/Y,C/Z,
TR2	21355	98.32	1218.52	1218.51	2	7.61384	P23193-2	TCEA1_HUMAN	Isoform 2 of Transcription elongation factor A protein 1	19	24	KNASTR	K1dEN2GlcNAc	20	N2H8F0S0	01Y41Y41M(31M21M21M)61M(31M21M)61M	Mannose	107.01	2	N,3;	0
TR2	21355	98.32	1218.52	1218.51	2	7.61384	Q00610	CLH1_HUMAN	Clathrin heavy chain 1	1246	1251	KANSTR	K1dEN3GlcNAc	1248	N2H8F0S0	01Y41Y41M(31M21M21M31G)61M(31M)61M	Mannose	99.93	1	N,2;	0
TR2	21355	98.32	1218.52	1218.51	2	7.61384	P23193-2	TCEA1_HUMAN	Isoform 2 of Transcription elongation factor A protein 1	19	24	KNASTR	K1dEN2GlcNAc	20	N2H8F0S0	01Y41Y41M(31M21M21M31G)61M(31M)61M	Mannose	99.93	1	N,3;	0
TR3	21451	98.32	1112.83	1112.82	3	4.61015	Q9P255	ZN492_HUMAN	Zinc finger protein 492	177	189	AYNETSNLSTHKR	A1dEN3GlcNAcK12dE	179	N2H8F0S0	01Y41Y41M(31M21M)61M(31M21M)61M21M	Mannose	56.04	1	N,0;	1	iI2-3-B/Y,C/Z,
TR3	21451	98.32	1112.83	1112.82	3	4.61015	Q9P255	ZN492_HUMAN	Zinc finger protein 492	177	189	AYNETSNLSTHKR	A1dEN7GlcNAcK12dE	183	N2H8F0S0	01Y41Y41M(31M21M)61M(31M21M)61M21M	Mannose	56.04	1	N,0;	1	iI2-3-B/Y,C/Z,
TR3	21451	98.32	1112.83	1112.82	3	4.59487	Q12797	ASPH_HUMAN	Aspartyl/asparaginyl beta-hydroxylase	704	715	CANETKTWEEGK	C1dE@CamN3GlcNAcK6dEK12dE	706	N2H8F0S0	01Y41Y41M(31M21M)61M(31M21M)61M21M	Mannose	46.96	1	N,0;	1	iI2-3-B/Y,C/Z,
TR1	21388	98.35	929.646	929.65	4	-4.03875	P04062	GLCM_HUMAN	Lysosomal acid glucosylceramidase	302	316	DLGPTLANSTHHNVR	D1dEN8GlcNAc	309	N2H10F0S0	01Y41Y41M(31M21M21M31G31G)61M(31M21M)61M	Mannose	140.87	1	N,0;	1	iI3-3-X35/C,
TR1	21388	98.35	929.646	929.65	4	-4.03875	P04062	GLCM_HUMAN	Lysosomal acid glucosylceramidase	302	316	DLGPTLANSTHHNVR	D1dEN8GlcNAc	309	N2H10F0S0	01Y41Y41M(31M21M21M31G31G21G)61M(31M)61M	Mannose	127.36	1	N,0;	0
TR1	21388	98.35	929.646	929.645	4	1.98934	Q8WYP5	ELYS_HUMAN	Protein ELYS	506	520	SGPSLNELIPDGYNR	S1dEN14GlcNAc	519	N2H10F0S0	01Y41Y41M(31M21M21M31G31G)61M(31M21M)61M	Mannose	118.34	1	N,0;	1	iI3-3-X35/C,
TR1	21388	98.35	930.151	930.151	4	0.0442804	Q8TF44	C2C4C_HUMAN	C2 calcium-dependent domain-containing protein 4C	341	354	SINCCVGLCLVPGK	S1dEN3GlcNAcC4CamC5CamC9CamK14dE	343	N2H10F0S0	01Y41Y41M(31M21M21M31G31G)61M(31M21M)61M	Mannose	107.67	1	N,0;	1	iI3-3-X35/C,
TR1	21388	98.35	929.903	929.901	4	2.10994	Q8IVU1	IGDC3_HUMAN	Immunoglobulin superfamily DCC subclass member 3	594	608	LLAYNQHGDGNATVR	L1dEN11GlcNAc	604	N2H10F0S0	01Y41Y41M(31M21M21M31G31G)61M(31M21M)61M	Mannose	100.07	1	N,3;	1	iI3-3-X35/C,
TR1	21388	98.35	929.646	929.645	4	1.98934	Q8WYP5	ELYS_HUMAN	Protein ELYS	506	520	SGPSLNELIPDGYNR	S1dEN14GlcNAc	519	N2H10F0S0	01Y41Y41M(31M21M21M31G)61M(31M21M)61M21M	Mannose	94.21	1	N,0;	0
TR1	21388	98.35	929.903	929.901	4	2.10994	Q8IVU1	IGDC3_HUMAN	Immunoglobulin superfamily DCC subclass member 3	594	608	LLAYNQHGDGNATVR	L1dEN11GlcNAc	604	N2H10F0S0	01Y41Y41M(31M21M21M31G31G21G)61M(31M)61M	Mannose	89.1	1	N,3;	0
TR1	21388	98.35	930.151	930.151	4	0.0442804	Q8TF44	C2C4C_HUMAN	C2 calcium-dependent domain-containing protein 4C	341	354	SINCCVGLCLVPGK	S1dEN3GlcNAcC4CamC5CamC9CamK14dE	343	N2H10F0S0	01Y41Y41M(31M21M21M31G)61M(31M21M)61M21M	Mannose	88.08	1	N,0;	0
TR3	21515	98.64	922.134	922.132	3	2.49436	P23229	ITA6_HUMAN	Integrin alpha-6	322	333	ANHSGAVVLLKR	A1dEN2GlcNAcK11dE	323	N2H6F0S0	01Y41Y41M(31M)61M(31M21M)61M	Mannose	44.04	1	N,2;	4	iI2-3-X15/C,iI2-3-X35/B,iI2-3-X45/C,iI2-3-B/Y,C/Z,
TR2	21459	98.84	1137	1136.98	2	9.41642	Q16555	DPYL2_HUMAN	Dihydropyrimidinase-related protein 2	566	572	ANITSLG	A1dEN2GlcNAc	567	N2H7F0S0	01Y41Y41M(31M21M)61M(31M21M)61M	Mannose	101.86	1	N,2;	1	iI2-3-B/Y,C/Z,
TR2	21459	98.84	1137	1136.98	2	9.41642	Q9NV06	DCA13_HUMAN	DDB1- and CUL4-associated factor 13	354	359	ANASEK	A1dEN2GlcNAcK6dE	355	N2H7F0S0	01Y41Y41M(31M21M)61M(31M21M)61M	Mannose	100.27	1	N,1;	1	iI2-3-B/Y,C/Z,
TR2	21459	98.84	1137	1136.98	2	9.41642	Q16555	DPYL2_HUMAN	Dihydropyrimidinase-related protein 2	566	572	ANITSLG	A1dEN2GlcNAc	567	N2H7F0S0	01Y41Y41M(31M)61M(31M21M)61M21M	Mannose	99.44	1	N,2;	1	iI2-3-B/Y,C/Z,
TR2	21459	98.84	1137	1136.98	2	9.41642	Q9NV06	DCA13_HUMAN	DDB1- and CUL4-associated factor 13	354	359	ANASEK	A1dEN2GlcNAcK6dE	355	N2H7F0S0	01Y41Y41M(31M)61M(31M21M)61M21M	Mannose	97.85	1	N,1;	1	iI2-3-B/Y,C/Z,
TR2	21459	98.84	1138	1137.99	2	8.15833	Q8WZ74	CTTB2_HUMAN	Cortactin-binding protein 2	1458	1463	VNTSPR	V1dEN2GlcNAc	1459	N2H7F0S0	01Y41Y41M(31M21M21M)61M(31M)61M	Mannose	91.37	1	N,0;	1	iI2-3-B/Y,C/Z,iIII2-3-B/Y,C/Z,
TR2	21459	98.84	1138	1137.99	2	8.15833	Q8WZ74	CTTB2_HUMAN	Cortactin-binding protein 2	1458	1463	VNTSPR	V1dEN2GlcNAc	1459	N2H7F0S0	01Y41Y41M(31M21M)61M(31M21M)61M	Mannose	89.07	1	N,0;	1	iI2-3-B/Y,C/Z,
TR2	21459	98.84	1138	1137.99	2	8.15833	Q9UBS0	KS6B2_HUMAN	Ribosomal protein S6 kinase beta-2	414	419	LNSSPR	L1dEN2GlcNAc	415	N2H7F0S0	01Y41Y41M(31M21M21M)61M(31M)61M	Mannose	86.53	1	N,0;	1	iI2-3-B/Y,C/Z,iIII2-3-B/Y,C/Z,
TR2	21459	98.84	1138	1137.99	2	8.15833	Q9UBS0	KS6B2_HUMAN	Ribosomal protein S6 kinase beta-2	414	419	LNSSPR	L1dEN2GlcNAc	415	N2H7F0S0	01Y41Y41M(31M21M)61M(31M21M)61M	Mannose	84.23	1	N,0;	1	iI2-3-B/Y,C/Z,
TR2	21467	98.88	1021.47	1021.47	3	1.61895	Q14126	DSG2_HUMAN	Desmoglein-2	459	468	YVQNGTYTVK	Y1dEN4GlcNAcK10dE	462	N4H5F1S0	01Y(61F)41Y41M(31M41Y41L)61M61Y41L	Complex	75.57	1	N,0;	0
TR2	21467	98.88	1021.47	1021.47	3	1.61895	Q14126	DSG2_HUMAN	Desmoglein-2	459	468	YVQNGTYTVK	Y1dEN4GlcNAcK10dE	462	N4H5F1S0	01Y41Y41M(31M41Y(31F)41L)61M61Y41L	Complex	63.31	1	N,0;	0
TR2	21467	98.88	1021.47	1021.48	3	-5.27501	O95803	NDST3_HUMAN	Bifunctional heparan sulfate N-deacetylase/N-sulfotransferase 3	240	250	TPENLSPSISK	T1dEN4GlcNAcK11dE	243	N4H5F1S0	01Y(61F)41Y41M(31M41Y41L)61M61Y41L	Complex	52.38	1	N,1;	0
TR2	21467	98.88	1021.47	1021.48	3	-5.27501	O95803	NDST3_HUMAN	Bifunctional heparan sulfate N-deacetylase/N-sulfotransferase 3	240	250	TPENLSPSISK	T1dEN4GlcNAcK11dE	243	N4H5F1S0	01Y(61F)41Y41M(31M)61M(21Y41L)61Y41L	Complex	47.04	1	N,1;	0
TR1	21521	99	1026.95	1026.94	4	9.17513	O95171	SCEL_HUMAN	Sciellin	463	477	SSEQGLDEHINVSPK	S1dEN11GlcNAcK15dE	473	N4H5F1S2	01Y(61F)41Y41M(31M)61M(21Y41L32S)61Y41L32S	Complex	48.38	1	N,0;	4	iI4-4-X01/B,iI4-4-X45/C,iI4-4-X15/C,iI4-4-X45/B,
TR2	21520	99.15	1055.47	1055.46	2	8.81077	Q16555	DPYL2_HUMAN	Dihydropyrimidinase-related protein 2	566	572	ANITSLG	A1dEN2GlcNAc	567	N2H6F0S0	01Y41Y41M(31M)61M(31M21M)61M	Mannose	81.98	1	N,1;	2	iI2-3-B/Z,iI2-3-B/Y,C/Z,
TR2	21520	99.15	1055.47	1055.46	2	3.48888	P50851	LRBA_HUMAN	Lipopolysaccharide-responsive and beige-like anchor protein	1215	1220	ATNLTR	A1dEN3GlcNAc	1217	N2H6F0S0	01Y41Y41M(31M)61M(31M21M)61M	Mannose	81.05	2	N,1;	2	iI2-3-B/Z,iI2-3-B/Y,C/Z,
TR2	21520	99.15	1055.47	1055.46	2	3.48888	P50851	LRBA_HUMAN	Lipopolysaccharide-responsive and beige-like anchor protein	1215	1220	ATNLTR	A1dEN3GlcNAc	1217	N2H6F0S0	01Y41Y41M(31M21M)61M(31M)61M	Mannose	81.05	2	N,1;	2	iI2-3-A34/Y,iI2-3-B/Y,C/Z,
TR2	21520	99.15	1055.47	1055.46	2	8.81077	Q16555	DPYL2_HUMAN	Dihydropyrimidinase-related protein 2	566	572	ANITSLG	A1dEN2GlcNAc	567	N2H6F0S0	01Y41Y41M(31M21M)61M(31M)61M	Mannose	79.65	1	N,1;	2	iI2-3-A34/Y,iI2-3-B/Y,C/Z,
TR2	21520	99.15	1056.47	1056.46	2	9.62504	Q8WZ74	CTTB2_HUMAN	Cortactin-binding protein 2	1458	1463	VNTSPR	V1dEN2GlcNAc	1459	N2H6F0S0	01Y41Y41M(31M21M)61M(31M)61M	Mannose	65.56	1	N,0;	2	iI2-3-A34/Y,iI2-3-B/Y,C/Z,
TR2	21520	99.15	1056.47	1056.46	2	9.62504	Q9UBS0	KS6B2_HUMAN	Ribosomal protein S6 kinase beta-2	414	419	LNSSPR	L1dEN2GlcNAc	415	N2H6F0S0	01Y41Y41M(31M21M)61M(31M)61M	Mannose	63.42	1	N,0;	2	iI2-3-A34/Y,iI2-3-B/Y,C/Z,
TR2	21520	99.15	1056.47	1056.46	2	9.62504	Q8WZ74	CTTB2_HUMAN	Cortactin-binding protein 2	1458	1463	VNTSPR	V1dEN2GlcNAc	1459	N2H6F0S0	01Y41Y41M(31M)61M(31M21M)61M	Mannose	63.35	1	N,0;	2	iI2-3-B/Z,iI2-3-B/Y,C/Z,
TR2	21520	99.15	1056.47	1056.46	2	9.62504	Q9UBS0	KS6B2_HUMAN	Ribosomal protein S6 kinase beta-2	414	419	LNSSPR	L1dEN2GlcNAc	415	N2H6F0S0	01Y41Y41M(31M)61M(31M21M)61M	Mannose	61.21	1	N,0;	2	iI2-3-B/Z,iI2-3-B/Y,C/Z,
TR2	21523	99.16	1141.18	1141.18	3	0.240636	Q96P65	QRFPR_HUMAN	Pyroglutamylated RF-amide peptide receptor	342	354	NVLSAVCYCIVNK	N1dEC7CamC9CamN12GlcNAcK13dE	353	N4H5F1S0	01Y(61F)41Y41M(31M41Y41L)61M61Y41L	Complex	142.24	1	N,0;	0
TR2	21523	99.16	1141.18	1141.17	3	7.62952	Q96GR2	ACBG1_HUMAN	Long-chain-fatty-acid--CoA ligase ACSBG1	291	304	GVMLSQDNITWTAR	G1dEN8GlcNAc	298	N4H5F1S0	01Y(61F)41Y41M(31M41Y41L)61M61Y41L	Complex	138.54	1	N,1;	0
TR2	21523	99.16	1141.18	1141.18	3	0.240636	Q96P65	QRFPR_HUMAN	Pyroglutamylated RF-amide peptide receptor	342	354	NVLSAVCYCIVNK	N1dEC7CamC9CamN12GlcNAcK13dE	353	N4H5F1S0	01Y41Y41M(31M41Y(31F)41L)61M61Y41L	Complex	115.51	1	N,0;	0
TR2	21523	99.16	1141.52	1141.51	3	2.46207	Q86UG4	SO6A1_HUMAN	Solute carrier organic anion transporter family member 6A1	495	507	LGNLTAPCNEKCR	L1dEN3GlcNAcC8CamK11dEC12Cam	497	N4H5F1S0	01Y(61F)41Y41M(31M41Y41L)61M61Y41L	Complex	103.92	1	N,0;	0
TR2	21523	99.16	1141.52	1141.51	3	2.46207	Q86UG4	SO6A1_HUMAN	Solute carrier organic anion transporter family member 6A1	495	507	LGNLTAPCNEKCR	L1dEN3GlcNAcC8CamK11dEC12Cam	497	N4H5F1S0	01Y41Y41M(31M41Y(31F)41L)61M61Y41L	Complex	87.67	1	N,0;	0
TR2	21523	99.16	1141.52	1141.51	3	4.96928	Q5VZL5	ZMYM4_HUMAN	Zinc finger MYM-type protein 4	401	414	DVISAQFENTTTSK	D1dEN9GlcNAcK14dE	409	N4H5F1S0	01Y(61F)41Y41M(31M41Y41L)61M61Y41L	Complex	85.51	1	N,1;	0
TR2	21523	99.16	1141.52	1141.51	3	4.96928	Q5VZL5	ZMYM4_HUMAN	Zinc finger MYM-type protein 4	401	414	DVISAQFENTTTSK	D1dEN9GlcNAcK14dE	409	N4H5F1S0	01Y41Y41M(31M41Y(31F)41L)61M61Y41L	Complex	76.44	1	N,1;	0
TR2	21523	99.16	1141.52	1141.52	3	-2.75905	O76027	ANXA9_HUMAN	Annexin A9	37	49	TFLNFSVDKDAQR	T1dEN4GlcNAcK9dE	40	N4H5F1S0	01Y(61F)41Y41M(31M41Y41L)61M61Y41L	Complex	72.84	1	N,1;	0
TR2	21523	99.16	1141.52	1141.52	3	-2.75905	O76027	ANXA9_HUMAN	Annexin A9	37	49	TFLNFSVDKDAQR	T1dEN4GlcNAcK9dE	40	N4H5F1S0	01Y41Y41M(31M41Y(31F)41L)61M61Y41L	Complex	63.96	1	N,1;	0
TR3	21673	99.43	1299.05	1299.04	2	4.98255	Q9UBE8	NLK_HUMAN	Serine/threonine-protein kinase NLK	470	475	NLSSVR	N1GlcNAc@dE	470	N2H9F0S0	01Y41Y41M(31M21M21M31G31G)61M(31M)61M	Mannose	135.26	1	N,0;	0
TR3	21673	99.43	1299.05	1299.04	2	4.98255	Q9H611	PIF1_HUMAN	ATP-dependent DNA helicase PIF1	486	491	NLSVSR	N1GlcNAc@dE	486	N2H9F0S0	01Y41Y41M(31M21M21M31G31G)61M(31M)61M	Mannose	135.26	1	N,0;	0
TR3	21673	99.43	1299.05	1299.04	2	4.98255	Q7RTR2	NLRC3_HUMAN	NLR family CARD domain-containing protein 3	1000	1005	VNSSLR	V1dEN2GlcNAc	1001	N2H9F0S0	01Y41Y41M(31M21M21M31G31G)61M(31M)61M	Mannose	130.31	1	N,0;	0
TR3	21673	99.43	1299.05	1299.04	2	4.98255	Q9UBE8	NLK_HUMAN	Serine/threonine-protein kinase NLK	470	475	NLSSVR	N1GlcNAc@dE	470	N2H9F0S0	01Y41Y41M(31M21M21M31G)61M(31M21M)61M	Mannose	125.25	1	N,0;	0
TR3	21673	99.43	1299.05	1299.04	2	4.98255	Q9H611	PIF1_HUMAN	ATP-dependent DNA helicase PIF1	486	491	NLSVSR	N1GlcNAc@dE	486	N2H9F0S0	01Y41Y41M(31M21M21M31G)61M(31M21M)61M	Mannose	125.25	1	N,0;	0
TR3	21673	99.43	1299.05	1299.04	2	4.98255	Q7RTR2	NLRC3_HUMAN	NLR family CARD domain-containing protein 3	1000	1005	VNSSLR	V1dEN2GlcNAc	1001	N2H9F0S0	01Y41Y41M(31M21M21M31G)61M(31M21M)61M	Mannose	120.3	1	N,0;	0
TR3	21673	99.43	1299.55	1299.54	2	9.54074	P23193-2	TCEA1_HUMAN	Isoform 2 of Transcription elongation factor A protein 1	19	24	KNASTR	K1dEN2GlcNAc	20	N2H9F0S0	01Y41Y41M(31M21M21M31G31G)61M(31M)61M	Mannose	79.77	1	N,2;	0
TR3	21673	99.43	1299.55	1299.54	2	9.54074	P23193-2	TCEA1_HUMAN	Isoform 2 of Transcription elongation factor A protein 1	19	24	KNASTR	K1dEN2GlcNAc	20	N2H9F0S0	01Y41Y41M(31M21M21M31G)61M(31M21M)61M	Mannose	75.07	1	N,2;	0
TR1	21640	99.57	1181.51	1181.51	3	0.059848	P16989	YBOX3_HUMAN	Y-box-binding protein 3	151	169	GAEAANVTGPDGVPVEGSR	G1dEN6GlcNAc	156	N2H8F0S0	01Y41Y41M(31M21M21M)61M(31M21M)61M	Mannose	175.69	1	N,0;	0
TR1	21640	99.57	1181.51	1181.51	3	0.059848	P16989	YBOX3_HUMAN	Y-box-binding protein 3	151	169	GAEAANVTGPDGVPVEGSR	G1dEN6GlcNAc	156	N2H8F0S0	01Y41Y41M(31M21M)61M(31M21M)61M21M	Mannose	168.15	1	N,0;	0
TR1	21643	99.58	1150.53	1150.52	3	8.72431	Q8WXE9	STON2_HUMAN	Stonin-2	342	356	SQNSSISSTTGKSQR	S1dEN3GlcNAcK12dE	344	N4H5F1S0	01Y(61F)41Y41M(31M41Y41L)61M61Y41L	Complex	84.11	1	N,1;	0
TR1	21643	99.58	1150.87	1150.86	3	7.8315	Q9UKB1	FBW1B_HUMAN	F-box/WD repeat-containing protein 11	47	61	CLQISNGTSSVIVSR	C1dE@CamN6GlcNAc	52	N4H5F1S0	01Y(61F)41Y41M(31M41Y41L)61M61Y41L	Complex	76.01	1	N,1;	0
TR1	21643	99.58	1150.53	1150.52	3	8.72431	Q8WXE9	STON2_HUMAN	Stonin-2	342	356	SQNSSISSTTGKSQR	S1dEN3GlcNAcK12dE	344	N4H5F1S0	01Y41Y41M(31M41Y(31F)41L)61M61Y41L	Complex	57.62	1	N,1;	0
TR1	21643	99.58	1150.87	1150.86	3	7.8315	Q9UKB1	FBW1B_HUMAN	F-box/WD repeat-containing protein 11	47	61	CLQISNGTSSVIVSR	C1dE@CamN6GlcNAc	52	N4H5F1S0	01Y(61F)41Y41M(31M)61M(21Y41L)61Y41L	Complex	54.76	1	N,1;	0
TR3	21708	99.61	1218.52	1218.51	2	7.8142	Q00610	CLH1_HUMAN	Clathrin heavy chain 1	1246	1251	KANSTR	K1dEN3GlcNAc	1248	N2H8F0S0	01Y41Y41M(31M21M21M)61M(31M21M)61M	Mannose	131.24	1	N,2;	1	iI3-3-X45/C,
TR3	21708	99.61	1218.52	1218.51	2	7.8142	Q00610	CLH1_HUMAN	Clathrin heavy chain 1	1246	1251	KANSTR	K1dEN3GlcNAc	1248	N2H8F0S0	01Y41Y41M(31M21M)61M(31M21M)61M21M	Mannose	128.82	1	N,2;	1	iI2-3-B/Y,C/Z,
TR3	21708	99.61	1219.03	1219.02	2	8.17274	Q8WZ74	CTTB2_HUMAN	Cortactin-binding protein 2	1458	1463	VNTSPR	V1dEN2GlcNAc	1459	N2H8F0S0	01Y41Y41M(31M21M21M)61M(31M21M)61M	Mannose	102.33	2	N,2;	1	iI3-3-X45/C,
TR3	21708	99.61	1219.03	1219.02	2	8.17274	Q8WZ74	CTTB2_HUMAN	Cortactin-binding protein 2	1458	1463	VNTSPR	V1dEN2GlcNAc	1459	N2H8F0S0	01Y41Y41M(31M21M21M31G)61M(31M)61M	Mannose	102.33	2	N,2;	0
TR3	21708	99.61	1219.03	1219.02	2	8.17274	Q9UBS0	KS6B2_HUMAN	Ribosomal protein S6 kinase beta-2	414	419	LNSSPR	L1dEN2GlcNAc	415	N2H8F0S0	01Y41Y41M(31M21M21M)61M(31M21M)61M	Mannose	97.78	2	N,2;	1	iI3-3-X45/C,
TR3	21708	99.61	1219.03	1219.02	2	8.17274	Q9UBS0	KS6B2_HUMAN	Ribosomal protein S6 kinase beta-2	414	419	LNSSPR	L1dEN2GlcNAc	415	N2H8F0S0	01Y41Y41M(31M21M21M31G)61M(31M)61M	Mannose	97.78	2	N,2;	0
TR3	21708	99.61	1219.03	1219.02	2	8.17274	Q8WZ74	CTTB2_HUMAN	Cortactin-binding protein 2	1458	1463	VNTSPR	V1dEN2GlcNAc	1459	N2H8F0S0	01Y41Y41M(31M21M)61M(31M21M)61M21M	Mannose	95.5	1	N,2;	1	iI2-3-B/Y,C/Z,
TR3	21708	99.61	1219.03	1219.02	2	8.17274	Q9UBS0	KS6B2_HUMAN	Ribosomal protein S6 kinase beta-2	414	419	LNSSPR	L1dEN2GlcNAc	415	N2H8F0S0	01Y41Y41M(31M21M)61M(31M21M)61M21M	Mannose	90.95	1	N,2;	1	iI2-3-B/Y,C/Z,
TR3	21708	99.61	1218.02	1218.01	2	9.34962	Q16555	DPYL2_HUMAN	Dihydropyrimidinase-related protein 2	566	572	ANITSLG	A1dEN2GlcNAc	567	N2H8F0S0	01Y41Y41M(31M21M21M)61M(31M21M)61M	Mannose	64.89	1	N,2;	1	iI3-3-X45/C,
TR3	21708	99.61	1218.02	1218.01	2	9.34962	Q16555	DPYL2_HUMAN	Dihydropyrimidinase-related protein 2	566	572	ANITSLG	A1dEN2GlcNAc	567	N2H8F0S0	01Y41Y41M(31M21M)61M(31M21M)61M21M	Mannose	62.72	1	N,2;	1	iI2-3-B/Y,C/Z,
TR1	21667	99.7	1138	1137.99	2	10.7916	P11047	LAMC1_HUMAN	Laminin subunit gamma-1	1439	1444	NATSTK	N1GlcNAc@dEK6dE	1439	N2H7F0S0	01Y41Y41M(31M21M)61M(31M21M)61M	Mannose	80.44	1	N,0;	1	iI2-3-B/Y,C/Z,
TR1	21667	99.7	1138	1137.99	2	10.7916	P11047	LAMC1_HUMAN	Laminin subunit gamma-1	1439	1444	NATSTK	N1GlcNAc@dEK6dE	1439	N2H7F0S0	01Y41Y41M(31M)61M(31M21M)61M21M	Mannose	78.17	1	N,0;	2	iI2-3-X02/B,iI2-3-B/Y,C/Z,
TR1	21667	99.7	1138	1137.99	2	10.7916	Q07954	LRP1_HUMAN	Prolow-density lipoprotein receptor-related protein 1	3260	3265	TTGTNK	T1dEN5GlcNAcK6dE	3264	N2H7F0S0	01Y41Y41M(31M21M)61M(31M21M)61M	Mannose	73.37	1	N,0;	1	iI2-3-B/Y,C/Z,
TR1	21667	99.7	1138	1137.99	2	10.7916	Q07954	LRP1_HUMAN	Prolow-density lipoprotein receptor-related protein 1	3260	3265	TTGTNK	T1dEN5GlcNAcK6dE	3264	N2H7F0S0	01Y41Y41M(31M)61M(31M21M)61M21M	Mannose	71.1	1	N,0;	2	iI2-3-X02/B,iI2-3-B/Y,C/Z,
TR1	21672	99.73	1006.79	1006.8	3	-1.62852	Q96AY3	FKB10_HUMAN	Peptidyl-prolyl cis-trans isomerase FKBP10	67	78	YHYNGTFEDGKK	Y1dEN4GlcNAcK11dEK12dE	70	N2H6F0S0	01Y41Y41M(31M21M)61M(31M)61M	Mannose	115.94	1	N,2;	2	iI2-3-A34/Y,iI2-3-B/Y,C/Z,
TR1	21672	99.73	1006.79	1006.8	3	-1.62852	Q96AY3	FKB10_HUMAN	Peptidyl-prolyl cis-trans isomerase FKBP10	67	78	YHYNGTFEDGKK	Y1dEN4GlcNAcK11dEK12dE	70	N2H6F0S0	01Y41Y41M(31M)61M(31M21M)61M	Mannose	111.18	1	N,2;	5	iI2-3-X15/C,iI2-3-X35/B,iI2-3-X45/C,iI2-3-X01/C,iI2-3-B/Y,C/Z,
TR3	21794	100.04	1055.97	1055.96	2	8.62735	Q00610	CLH1_HUMAN	Clathrin heavy chain 1	1246	1251	KANSTR	K1dEN3GlcNAc	1248	N2H6F0S0	01Y41Y41M(31M)61M(31M21M)61M	Mannose	77.42	1	N,2;	1	iI2-3-B/Y,C/Z,
TR3	21794	100.04	1055.97	1055.96	2	8.62735	P23193-2	TCEA1_HUMAN	Isoform 2 of Transcription elongation factor A protein 1	19	24	KNASTR	K1dEN2GlcNAc	20	N2H6F0S0	01Y41Y41M(31M)61M(31M21M)61M	Mannose	77.42	1	N,2;	1	iI2-3-B/Y,C/Z,
TR3	21794	100.04	1055.97	1055.96	2	8.62735	Q00610	CLH1_HUMAN	Clathrin heavy chain 1	1246	1251	KANSTR	K1dEN3GlcNAc	1248	N2H6F0S0	01Y41Y41M(31M21M)61M(31M)61M	Mannose	75.06	1	N,2;	2	iI2-3-A34/Y,iI2-3-B/Y,C/Z,
TR3	21794	100.04	1055.97	1055.96	2	8.62735	P23193-2	TCEA1_HUMAN	Isoform 2 of Transcription elongation factor A protein 1	19	24	KNASTR	K1dEN2GlcNAc	20	N2H6F0S0	01Y41Y41M(31M21M)61M(31M)61M	Mannose	75.06	1	N,2;	2	iI2-3-A34/Y,iI2-3-B/Y,C/Z,
TR2	21717	100.13	1163.87	1163.86	3	1.69726	P08648	ITA5_HUMAN	Integrin alpha-5	864	878	VTGLNCTTNHPINPK	V1dEN5GlcNAcC6CamK15dE	868	N2H8F0S0	01Y41Y41M(31M21M21M31G)61M(31M)61M	Mannose	163.52	1	N,0;	0
TR2	21717	100.13	1163.87	1163.86	3	1.69726	P08648	ITA5_HUMAN	Integrin alpha-5	864	878	VTGLNCTTNHPINPK	V1dEN5GlcNAcC6CamK15dE	868	N2H8F0S0	01Y41Y41M(31M21M21M)61M(31M21M)61M	Mannose	155.93	1	N,0;	1	iI2-3-X45/C,
TR3	21813	100.14	1137	1136.99	2	4.92582	Q9UBE8	NLK_HUMAN	Serine/threonine-protein kinase NLK	470	475	NLSSVR	N1GlcNAc@dE	470	N2H7F0S0	01Y41Y41M(31M21M)61M(31M21M)61M	Mannose	138.29	1	N,0;	1	iI2-3-B/Y,C/Z,
TR3	21813	100.14	1137	1136.99	2	4.92582	Q9H611	PIF1_HUMAN	ATP-dependent DNA helicase PIF1	486	491	NLSVSR	N1GlcNAc@dE	486	N2H7F0S0	01Y41Y41M(31M21M)61M(31M21M)61M	Mannose	138.29	1	N,0;	1	iI2-3-B/Y,C/Z,
TR3	21813	100.14	1137	1136.99	2	4.92582	Q9UBE8	NLK_HUMAN	Serine/threonine-protein kinase NLK	470	475	NLSSVR	N1GlcNAc@dE	470	N2H7F0S0	01Y41Y41M(31M)61M(31M21M)61M21M	Mannose	135.78	1	N,0;	1	iI2-3-B/Y,C/Z,
TR3	21813	100.14	1137	1136.99	2	4.92582	Q9H611	PIF1_HUMAN	ATP-dependent DNA helicase PIF1	486	491	NLSVSR	N1GlcNAc@dE	486	N2H7F0S0	01Y41Y41M(31M)61M(31M21M)61M21M	Mannose	135.78	1	N,0;	1	iI2-3-B/Y,C/Z,
TR3	21813	100.14	1137	1136.99	2	4.92582	Q7RTR2	NLRC3_HUMAN	NLR family CARD domain-containing protein 3	1000	1005	VNSSLR	V1dEN2GlcNAc	1001	N2H7F0S0	01Y41Y41M(31M21M)61M(31M21M)61M	Mannose	128.73	1	N,1;	1	iI2-3-B/Y,C/Z,
TR3	21813	100.14	1137	1136.99	2	4.92582	Q7RTR2	NLRC3_HUMAN	NLR family CARD domain-containing protein 3	1000	1005	VNSSLR	V1dEN2GlcNAc	1001	N2H7F0S0	01Y41Y41M(31M)61M(31M21M)61M21M	Mannose	126.22	1	N,1;	1	iI2-3-B/Y,C/Z,
TR3	21813	100.14	1137	1136.99	2	4.92582	Q9Y252	RNF6_HUMAN	E3 ubiquitin-protein ligase RNF6	287	292	SNVTVR	S1dEN2GlcNAc	288	N2H7F0S0	01Y41Y41M(31M21M)61M(31M21M)61M	Mannose	122.26	1	N,0;	1	iI2-3-B/Y,C/Z,
TR3	21813	100.14	1137	1136.99	2	4.92582	P50851	LRBA_HUMAN	Lipopolysaccharide-responsive and beige-like anchor protein	1215	1220	ATNLTR	A1dEN3GlcNAc	1217	N2H7F0S0	01Y41Y41M(31M21M)61M(31M21M)61M	Mannose	120.32	1	N,1;	1	iI2-3-B/Y,C/Z,
TR3	21813	100.14	1137	1136.99	2	4.92582	O94851	MICA2_HUMAN	[F-actin]-monooxygenase MICAL2	507	512	SVNLSR	S1dEN3GlcNAc	509	N2H7F0S0	01Y41Y41M(31M21M)61M(31M21M)61M	Mannose	120.32	1	N,0;	1	iI2-3-B/Y,C/Z,
TR3	21813	100.14	1137	1136.99	2	4.92582	Q9Y252	RNF6_HUMAN	E3 ubiquitin-protein ligase RNF6	287	292	SNVTVR	S1dEN2GlcNAc	288	N2H7F0S0	01Y41Y41M(31M)61M(31M21M)61M21M	Mannose	119.75	1	N,0;	1	iI2-3-B/Y,C/Z,
TR3	21813	100.14	1137	1136.99	2	4.92582	P50851	LRBA_HUMAN	Lipopolysaccharide-responsive and beige-like anchor protein	1215	1220	ATNLTR	A1dEN3GlcNAc	1217	N2H7F0S0	01Y41Y41M(31M)61M(31M21M)61M21M	Mannose	117.81	1	N,1;	1	iI2-3-B/Y,C/Z,
TR3	21813	100.14	1137	1136.99	2	4.92582	O94851	MICA2_HUMAN	[F-actin]-monooxygenase MICAL2	507	512	SVNLSR	S1dEN3GlcNAc	509	N2H7F0S0	01Y41Y41M(31M)61M(31M21M)61M21M	Mannose	117.81	1	N,0;	1	iI2-3-B/Y,C/Z,
TR3	21813	100.14	1137.5	1137.49	2	9.27666	Q00610	CLH1_HUMAN	Clathrin heavy chain 1	1246	1251	KANSTR	K1dEN3GlcNAc	1248	N2H7F0S0	01Y41Y41M(31M21M21M)61M(31M)61M	Mannose	95.68	1	N,3;	1	iI2-3-B/Y,C/Z,iIII2-3-B/Y,C/Z,
TR3	21813	100.14	1137.5	1137.49	2	9.27666	P23193-2	TCEA1_HUMAN	Isoform 2 of Transcription elongation factor A protein 1	19	24	KNASTR	K1dEN2GlcNAc	20	N2H7F0S0	01Y41Y41M(31M21M21M)61M(31M)61M	Mannose	95.68	1	N,4;	1	iI2-3-B/Y,C/Z,iIII2-3-B/Y,C/Z,
TR3	21813	100.14	1137.5	1137.49	2	9.27666	Q00610	CLH1_HUMAN	Clathrin heavy chain 1	1246	1251	KANSTR	K1dEN3GlcNAc	1248	N2H7F0S0	01Y41Y41M(31M21M)61M(31M21M)61M	Mannose	93.26	1	N,3;	1	iI2-3-B/Y,C/Z,
TR3	21813	100.14	1137.5	1137.49	2	9.27666	P23193-2	TCEA1_HUMAN	Isoform 2 of Transcription elongation factor A protein 1	19	24	KNASTR	K1dEN2GlcNAc	20	N2H7F0S0	01Y41Y41M(31M21M)61M(31M21M)61M	Mannose	93.26	1	N,4;	1	iI2-3-B/Y,C/Z,
TR3	21813	100.14	1138	1137.99	2	6.97837	Q8WZ74	CTTB2_HUMAN	Cortactin-binding protein 2	1458	1463	VNTSPR	V1dEN2GlcNAc	1459	N2H7F0S0	01Y41Y41M(31M)61M(31M21M)61M21M	Mannose	80.38	1	N,1;	1	iI2-3-B/Y,C/Z,
TR3	21813	100.14	1138	1137.99	2	4.03369	O15117	FYB1_HUMAN	FYN-binding protein 1	218	223	NVSSSK	N1GlcNAc@dEK6dE	218	N2H7F0S0	01Y41Y41M(31M21M)61M(31M21M)61M	Mannose	75.98	2	N,0;	1	iI2-3-B/Y,C/Z,
TR3	21813	100.14	1138	1137.99	2	4.03369	O15117	FYB1_HUMAN	FYN-binding protein 1	218	223	NVSSSK	N1GlcNAc@dEK6dE	218	N2H7F0S0	01Y41Y41M(31M21M21M)61M(31M)61M	Mannose	75.98	2	N,0;	1	iI2-3-B/Y,C/Z,iIII2-3-B/Y,C/Z,
TR3	21813	100.14	1138	1137.99	2	6.97837	Q9UBS0	KS6B2_HUMAN	Ribosomal protein S6 kinase beta-2	414	419	LNSSPR	L1dEN2GlcNAc	415	N2H7F0S0	01Y41Y41M(31M)61M(31M21M)61M21M	Mannose	75.84	1	N,1;	1	iI2-3-B/Y,C/Z,
TR3	21813	100.14	1138	1137.99	2	4.03369	O15117	FYB1_HUMAN	FYN-binding protein 1	218	223	NVSSSK	N1GlcNAc@dEK6dE	218	N2H7F0S0	01Y41Y41M(31M)61M(31M21M)61M21M	Mannose	69.09	1	N,0;	1	iI2-3-B/Y,C/Z,
TR2	21721	100.15	1219.02	1219.02	2	4.8246	P11047	LAMC1_HUMAN	Laminin subunit gamma-1	1439	1444	NATSTK	N1GlcNAc@dEK6dE	1439	N2H8F0S0	01Y41Y41M(31M21M21M31G)61M(31M)61M	Mannose	89.01	1	N,0;	0
TR2	21721	100.15	1219.02	1219.02	2	4.8246	Q07954	LRP1_HUMAN	Prolow-density lipoprotein receptor-related protein 1	3260	3265	TTGTNK	T1dEN5GlcNAcK6dE	3264	N2H8F0S0	01Y41Y41M(31M21M21M31G)61M(31M)61M	Mannose	82.1	1	N,0;	0
TR2	21721	100.15	1219.02	1219.02	2	4.8246	O15117	FYB1_HUMAN	FYN-binding protein 1	218	223	NVSSSK	N1GlcNAc@dEK6dE	218	N2H8F0S0	01Y41Y41M(31M21M21M31G)61M(31M)61M	Mannose	79.92	1	N,0;	0
TR3	21841	100.28	1051.5	1051.49	3	5.19889	P56199	ITA1_HUMAN	Integrin alpha-1	418	428	NTTFNVESTKK	N1GlcNAc@dEK10dEK11dE	418	N2H8F0S0	01Y41Y41M(31M21M)61M(31M21M)61M21M	Mannose	74.84	1	N,0;	1	iI2-3-B/Y,C/Z,
TR3	21841	100.28	1051.5	1051.49	3	5.19889	P56199	ITA1_HUMAN	Integrin alpha-1	418	428	NTTFNVESTKK	N1GlcNAc@dEK10dEK11dE	418	N2H8F0S0	01Y41Y41M(31M21M21M)61M(31M21M)61M	Mannose	68.66	1	N,0;	0
TR2	21766	100.37	1150.52	1150.52	3	5.5413	Q8WXE9	STON2_HUMAN	Stonin-2	342	356	SQNSSISSTTGKSQR	S1dEN3GlcNAcK12dE	344	N4H5F1S0	01Y(61F)41Y41M(31M)61M(21Y41L)61Y41L	Complex	59.45	1	N,0;	0
TR2	21770	100.4	1060.82	1060.81	3	6.64921	Q96AY3	FKB10_HUMAN	Peptidyl-prolyl cis-trans isomerase FKBP10	67	78	YHYNGTFEDGKK	Y1dEN4GlcNAcK11dEK12dE	70	N2H7F0S0	01Y41Y41M(31M21M)61M(31M21M)61M	Mannose	148.08	1	N,1;	1	iI2-3-B/Y,C/Z,
TR2	21770	100.4	1060.82	1060.81	3	6.64921	Q96AY3	FKB10_HUMAN	Peptidyl-prolyl cis-trans isomerase FKBP10	67	78	YHYNGTFEDGKK	Y1dEN4GlcNAcK11dEK12dE	70	N2H7F0S0	01Y41Y41M(31M)61M(31M21M)61M21M	Mannose	143.08	2	N,1;	4	iI2-3-X15/C,iI2-3-X35/B,iI2-3-X45/C,iI2-3-B/Y,C/Z,
TR2	21770	100.4	1060.82	1060.81	3	6.64921	Q96AY3	FKB10_HUMAN	Peptidyl-prolyl cis-trans isomerase FKBP10	67	78	YHYNGTFEDGKK	Y1dEN4GlcNAcK11dEK12dE	70	N2H7F0S0	01Y41Y41M(31M21M21M)61M(31M)61M	Mannose	143.08	2	N,1;	0
TR1	21816	100.43	988.766	988.768	3	-1.98075	P56199	ITA1_HUMAN	Integrin alpha-1	418	427	NTTFNVESTK	N1GlcNAc@dEK10dE	418	N2H8F0S0	01Y41Y41M(31M21M)61M(31M21M)61M21M	Mannose	41.82	1	N,0;	1	iI2-3-B/Y,C/Z,
TR3	21876	100.46	1056.47	1056.46	2	5.43969	O15117	FYB1_HUMAN	FYN-binding protein 1	218	223	NVSSSK	N1GlcNAc@dEK6dE	218	N2H6F0S0	01Y41Y41M(31M21M)61M(31M)61M	Mannose	51.18	1	N,0;	2	iI2-3-A34/Y,iI2-3-B/Y,C/Z,
TR2	21816	100.63	1017.81	1017.81	3	1.22861	P53634	CATC_HUMAN	Dipeptidyl peptidase 1	51	63	DVNCSVMGPQEKK	D1dEN3GlcNAcC4CamK12dEK13dE	53	N2H6F0S0	01Y41Y41M(31M)61M(31M21M)61M	Mannose	48.23	2	N,0;	4	iI2-3-X15/C,iI2-3-X35/B,iI2-3-X45/C,iI2-3-B/Y,C/Z,
TR2	21816	100.63	1017.81	1017.81	3	1.22861	P53634	CATC_HUMAN	Dipeptidyl peptidase 1	51	63	DVNCSVMGPQEKK	D1dEN3GlcNAcC4CamK12dEK13dE	53	N2H6F0S0	01Y41Y41M(31M21M)61M(31M)61M	Mannose	48.23	2	N,0;	1	iI2-3-A34/Y,
TR2	21831	100.7	1056.47	1056.46	2	6.82625	P11047	LAMC1_HUMAN	Laminin subunit gamma-1	1439	1444	NATSTK	N1GlcNAc@dEK6dE	1439	N2H6F0S0	01Y41Y41M(31M21M)61M(31M)61M	Mannose	81.79	1	N,0;	2	iI2-3-A34/Y,iI2-3-B/Y,C/Z,
TR2	21831	100.7	1056.47	1056.46	2	6.82625	P11047	LAMC1_HUMAN	Laminin subunit gamma-1	1439	1444	NATSTK	N1GlcNAc@dEK6dE	1439	N2H6F0S0	01Y41Y41M(31M)61M(31M21M)61M	Mannose	79.52	1	N,0;	1	iI2-3-B/Y,C/Z,
TR2	21831	100.7	1056.47	1056.46	2	6.82625	Q07954	LRP1_HUMAN	Prolow-density lipoprotein receptor-related protein 1	3260	3265	TTGTNK	T1dEN5GlcNAcK6dE	3264	N2H6F0S0	01Y41Y41M(31M21M)61M(31M)61M	Mannose	72.81	1	N,0;	2	iI2-3-A34/Y,iI2-3-B/Y,C/Z,
TR2	21831	100.7	1056.47	1056.46	2	6.82625	Q07954	LRP1_HUMAN	Prolow-density lipoprotein receptor-related protein 1	3260	3265	TTGTNK	T1dEN5GlcNAcK6dE	3264	N2H6F0S0	01Y41Y41M(31M)61M(31M21M)61M	Mannose	70.54	1	N,0;	1	iI2-3-B/Y,C/Z,
TR1	21909	100.88	1046.11	1046.11	3	1.29467	Q9ULS6	KCNS2_HUMAN	Potassium voltage-gated channel subfamily S member 2	454	464	SLMASLTNMSR	S1dEN8GlcNAc	461	N2H9F0S0	01Y41Y41M(31M21M21M)61M(31M21M)61M21M	Mannose	53.46	1	N,1;	0
TR1	21909	100.88	1046.11	1046.11	3	1.29467	Q9ULS6	KCNS2_HUMAN	Potassium voltage-gated channel subfamily S member 2	454	464	SLMASLTNMSR	S1dEN8GlcNAc	461	N2H9F0S0	01Y41Y41M(31M21M21M31G)61M(31M21M)61M	Mannose	45.86	2	N,1;	0
TR1	21909	100.88	1046.11	1046.11	3	1.29467	Q9ULS6	KCNS2_HUMAN	Potassium voltage-gated channel subfamily S member 2	454	464	SLMASLTNMSR	S1dEN8GlcNAc	461	N2H9F0S0	01Y41Y41M(31M21M21M31G31G)61M(31M)61M	Mannose	45.86	2	N,1;	0
TR3	21963	100.89	1271.9	1271.9	3	4.18555	P08648	ITA5_HUMAN	Integrin alpha-5	864	878	VTGLNCTTNHPINPK	V1dEN5GlcNAcC6CamK15dE	868	N2H10F0S0	01Y41Y41M(31M21M21M31G)61M(31M21M)61M21M	Mannose	70.9	1	N,0;	0
TR3	21963	100.89	1271.9	1271.9	3	4.18555	P08648	ITA5_HUMAN	Integrin alpha-5	864	878	VTGLNCTTNHPINPK	V1dEN5GlcNAcC6CamK15dE	868	N2H10F0S0	01Y41Y41M(31M21M21M31G31G)61M(31M21M)61M	Mannose	66.65	1	N,0;	0
TR1	21948	101.07	962.691	962.688	4	2.56154	P08648	ITA5_HUMAN	Integrin alpha-5	864	878	VTGLNCTTNHPINPK	V1dEN5GlcNAcC6CamK15dE	868	N4H5F1S1	01Y(61F)41Y41M(31M(21Y41L32S)41Y)61M61M	Hybrid	76.66	1	N,1;	4	iIII4-5-A15/Y,iIII4-5-A01/Y,iIII4-5-X23/C,iIII4-5-A14/Z,iIII4-5-A01/Z,iIII4-5-X23/B,
TR3	22000	101.08	1219.03	1219.02	2	7.7286	Q07954	LRP1_HUMAN	Prolow-density lipoprotein receptor-related protein 1	3260	3265	TTGTNK	T1dEN5GlcNAcK6dE	3264	N2H8F0S0	01Y41Y41M(31M21M)61M(31M21M)61M21M	Mannose	98.05	1	N,0;	1	iI2-3-B/Y,C/Z,
TR2	21910	101.1	1238.21	1238.21	3	0.521701	Q6X784	ZPBP2_HUMAN	Zona pellucida-binding protein 2	247	258	SQAYIFYHNFNK	S1dEN11GlcNAcK12dE	257	N4H5F1S1	01Y(61F)41Y41M(31M41Y41L)61M61Y41L32S	Complex	46.83	1	N,1;	1	iI3-4-X45/C,
TR2	21910	101.1	1238.21	1238.21	3	0.521701	Q6X784	ZPBP2_HUMAN	Zona pellucida-binding protein 2	247	258	SQAYIFYHNFNK	S1dEN11GlcNAcK12dE	257	N4H5F1S1	01Y41Y41M(31M41Y41L)61M21Y(31F)41L32S	Complex	44.76	1	N,1;	0
TR1	21984	101.25	1138.84	1138.84	3	4.89481	P35613	BASI_HUMAN	Basigin	258	273	ITDSEDKALMNGSESR	I1dEK7dEN11GlcNAc	268	N2H7F0S0	01Y41Y41M(31M21M)61M(31M21M)61M	Mannose	115.96	1	N,0;	1	iI2-3-B/Y,C/Z,
TR1	21984	101.25	1138.84	1138.84	3	4.89481	P35613	BASI_HUMAN	Basigin	258	273	ITDSEDKALMNGSESR	I1dEK7dEN11GlcNAc	268	N2H7F0S0	01Y41Y41M(31M)61M(31M21M)61M21M	Mannose	111.09	1	N,0;	4	iI2-3-X15/C,iI2-3-X35/B,iI2-3-X45/C,iI2-3-B/Y,C/Z,
TR3	22049	101.33	1300.05	1300.05	2	4.10923	P11047	LAMC1_HUMAN	Laminin subunit gamma-1	1439	1444	NATSTK	N1GlcNAc@dEK6dE	1439	N2H9F0S0	01Y41Y41M(31M21M21M31G)61M(31M21M)61M	Mannose	69.71	1	N,0;	0
TR3	22049	101.33	1300.05	1300.05	2	4.10923	Q07954	LRP1_HUMAN	Prolow-density lipoprotein receptor-related protein 1	3260	3265	TTGTNK	T1dEN5GlcNAcK6dE	3264	N2H9F0S0	01Y41Y41M(31M21M21M31G)61M(31M21M)61M	Mannose	60.21	1	N,0;	0
TR3	22049	101.33	1300.05	1300.05	2	4.10923	P11047	LAMC1_HUMAN	Laminin subunit gamma-1	1439	1444	NATSTK	N1GlcNAc@dEK6dE	1439	N2H9F0S0	01Y41Y41M(31M21M21M)61M(31M21M)61M21M	Mannose	58.51	1	N,0;	0
TR1	22002	101.34	1009.11	1009.1	3	9.02917	P53634	CATC_HUMAN	Dipeptidyl peptidase 1	51	62	DVNCSVMGPQEK	D1dEN3GlcNAcC4CamK12dE	53	N2H7F0S0	01Y41Y41M(31M21M)61M(31M21M)61M	Mannose	82.65	1	N,2;	1	iI2-3-B/Y,C/Z,
TR1	22002	101.34	1009.11	1009.1	3	9.02917	P53634	CATC_HUMAN	Dipeptidyl peptidase 1	51	62	DVNCSVMGPQEK	D1dEN3GlcNAcC4CamK12dE	53	N2H7F0S0	01Y41Y41M(31M)61M(31M21M)61M21M	Mannose	80.89	1	N,2;	5	iI2-3-X15/C,iI2-3-X35/B,iI2-3-X45/C,iI2-3-X02/B,iI2-3-B/Y,C/Z,
TR3	22057	101.36	836.38	836.375	4	5.30703	Q96AY3	FKB10_HUMAN	Peptidyl-prolyl cis-trans isomerase FKBP10	67	78	YHYNGTFEDGKK	Y1dEN4GlcNAcK11dEK12dE	70	N2H8F0S0	01Y41Y41M(31M21M)61M(31M21M)61M21M	Mannose	108.27	1	N,1;	0
TR3	22057	101.36	836.38	836.379	4	0.172974	Q03001	DYST_HUMAN	Dystonin	5220	5233	KLEALMASNDNANK	K1dEN13GlcNAcK14dE	5232	N2H8F0S0	01Y41Y41M(31M21M)61M(31M21M)61M21M	Mannose	87.88	1	N,1;	0
TR3	22057	101.36	836.38	836.379	4	0.972851	P0C6C1	AN34C_HUMAN	Ankyrin repeat domain-containing protein 34C	407	420	KLNSSHLSLFHGSR	K1dEN3GlcNAc	409	N2H8F0S0	01Y41Y41M(31M21M)61M(31M21M)61M21M	Mannose	85.98	2	N,1;	0
TR3	22057	101.36	836.38	836.379	4	0.972851	P0C6C1	AN34C_HUMAN	Ankyrin repeat domain-containing protein 34C	407	420	KLNSSHLSLFHGSR	K1dEN3GlcNAc	409	N2H8F0S0	01Y41Y41M(31M21M21M)61M(31M21M)61M	Mannose	85.98	2	N,1;	0
TR3	22057	101.36	836.38	836.379	4	0.172974	Q03001	DYST_HUMAN	Dystonin	5220	5233	KLEALMASNDNANK	K1dEN13GlcNAcK14dE	5232	N2H8F0S0	01Y41Y41M(31M21M21M)61M(31M21M)61M	Mannose	85.7	1	N,1;	0
TR3	22057	101.36	836.38	836.379	4	0.972851	P0C6C1	AN34C_HUMAN	Ankyrin repeat domain-containing protein 34C	407	420	KLNSSHLSLFHGSR	K1dEN3GlcNAc	409	N2H8F0S0	01Y41Y41M(31M21M21M31G)61M(31M)61M	Mannose	79.48	1	N,1;	0
TR3	22063	101.4	1114.84	1114.83	3	4.10671	Q96AY3	FKB10_HUMAN	Peptidyl-prolyl cis-trans isomerase FKBP10	67	78	YHYNGTFEDGKK	Y1dEN4GlcNAcK11dEK12dE	70	N2H8F0S0	01Y41Y41M(31M21M21M31G)61M(31M)61M	Mannose	191.14	1	N,2;	0
TR3	22063	101.4	1114.84	1114.83	3	4.10671	Q96AY3	FKB10_HUMAN	Peptidyl-prolyl cis-trans isomerase FKBP10	67	78	YHYNGTFEDGKK	Y1dEN4GlcNAcK11dEK12dE	70	N2H8F0S0	01Y41Y41M(31M21M21M)61M(31M21M)61M	Mannose	178.31	1	N,2;	0
TR3	22078	101.47	1219.03	1219.02	2	5.82598	P11047	LAMC1_HUMAN	Laminin subunit gamma-1	1439	1444	NATSTK	N1GlcNAc@dEK6dE	1439	N2H8F0S0	01Y41Y41M(31M21M21M)61M(31M21M)61M	Mannose	108.99	1	N,0;	0
TR3	22078	101.47	1219.03	1219.02	2	5.82598	P11047	LAMC1_HUMAN	Laminin subunit gamma-1	1439	1444	NATSTK	N1GlcNAc@dEK6dE	1439	N2H8F0S0	01Y41Y41M(31M21M)61M(31M21M)61M21M	Mannose	106.63	1	N,0;	1	iI2-3-B/Y,C/Z,
TR3	22078	101.47	1219.03	1219.02	2	5.82598	Q07954	LRP1_HUMAN	Prolow-density lipoprotein receptor-related protein 1	3260	3265	TTGTNK	T1dEN5GlcNAcK6dE	3264	N2H8F0S0	01Y41Y41M(31M21M21M)61M(31M21M)61M	Mannose	99.6	1	N,0;	0
TR2	22006	101.58	1214.87	1214.87	3	1.16004	P35613	BASI_HUMAN	Basigin	258	273	ITDSEDKALMNGSESR	I1dEK7dEN11GlcNAc	268	N4H5F1S0	01Y(61F)41Y41M(31M41Y41L)61M61Y41L	Complex	99.17	1	N,1;	0
TR2	22006	101.58	1214.87	1214.87	3	1.16004	P35613	BASI_HUMAN	Basigin	258	273	ITDSEDKALMNGSESR	I1dEK7dEN11GlcNAc	268	N4H5F1S0	01Y41Y41M(31M41Y(31F)41L)61M61Y41L	Complex	80.81	1	N,1;	0
TR1	22100	101.8	1035.47	1035.46	4	2.67116	P08648	ITA5_HUMAN	Integrin alpha-5	864	878	VTGLNCTTNHPINPK	V1dEN5GlcNAcC6CamK15dE	868	N4H5F1S2	01Y41Y41M(31M)61M(21Y(31F)41L32S)61Y41L32S	Complex	49.24	1	N,1;	0
TR1	22100	101.8	1035.47	1035.46	4	2.67116	P08648	ITA5_HUMAN	Integrin alpha-5	864	878	VTGLNCTTNHPINPK	V1dEN5GlcNAcC6CamK15dE	868	N4H5F1S2	01Y(61F)41Y41M(31M)61M(21Y41L32S)61Y41L32S	Complex	47.59	1	N,1;	4	iI4-4-X01/B,iI4-4-X45/C,iI4-4-X45/B,iI4-4-X45/B,
TR1	22102	101.81	1233.04	1233.03	2	8.11386	Q8WXA9	SREK1_HUMAN	Splicing regulatory glutamine/lysine-rich protein 1	454	459	NSTSLK	N1GlcNAc@dEK6dE	454	N2H8F0S0	01Y41Y41M(31M21M21M31G)61M(31M)61M	Mannose	128.64	1	N,0;	0
TR1	22102	101.81	1233.04	1233.03	2	8.11386	Q6AWC8	YK026_HUMAN	Putative uncharacterized protein LOC100129027	30	35	NTSLSK	N1GlcNAc@dEK6dE	30	N2H8F0S0	01Y41Y41M(31M21M21M31G)61M(31M)61M	Mannose	128.64	1	N,0;	0
TR1	22102	101.81	1233.04	1233.03	2	8.11386	Q14CN2	CLCA4_HUMAN	Calcium-activated chloride channel regulator 4	851	856	SNLTSK	S1dEN2GlcNAcK6dE	852	N2H8F0S0	01Y41Y41M(31M21M21M31G)61M(31M)61M	Mannose	128.64	1	N,1;	0
TR1	22102	101.81	1233.04	1233.06	2	-11.6899	Q9H3P2	NELFA_HUMAN	Negative elongation factor A	430	435	NLSLTR	N1GlcNAc@dE	430	N6H3F0S0	01Y41Y41M(31M41Y)(41Y)61M(21Y)61Y	Complex	52.82	1	N,0;	3	BIII2,CIII2,13XIII3,
TR1	22102	101.81	1233.04	1233.06	2	-11.6899	P25391	LAMA1_HUMAN	Laminin subunit alpha-1	2046	2051	VNTTLR	V1dEN2GlcNAc	2047	N6H3F0S0	01Y41Y41M(31M41Y)(41Y)61M(21Y)61Y	Complex	47.76	1	N,2;	3	BIII2,CIII2,13XIII3,
TR1	22102	101.81	1233.04	1233.06	2	-11.6899	Q9H3P2	NELFA_HUMAN	Negative elongation factor A	430	435	NLSLTR	N1GlcNAc@dE	430	N6H3F0S0	01Y41Y41M(31M(21Y)41Y)61M(21Y)61Y	Complex	46.45	1	N,0;	2	iI3III3Y,iI3IV3Y,iII3III3Y,iII3IV3Y,iI3III3Y,iI3IV3Y,iII3III3Y,iII3IV3Y,
TR1	22102	101.81	1233.04	1233.06	2	-11.6899	P25391	LAMA1_HUMAN	Laminin subunit alpha-1	2046	2051	VNTTLR	V1dEN2GlcNAc	2047	N6H3F0S0	01Y41Y41M(31M(21Y)41Y)61M(21Y)61Y	Complex	41.39	1	N,2;	2	iI3III3Y,iI3IV3Y,iII3III3Y,iII3IV3Y,iI3III3Y,iI3IV3Y,iII3III3Y,iII3IV3Y,
TR1	22102	101.81	1233.04	1233.05	2	-7.15163	P16383	GCFC2_HUMAN	GC-rich sequence DNA-binding factor 2	630	635	SAVENK	S1dEN5GlcNAcK6dE	634	N6H3F0S0	01Y41Y41M(31M41Y)(41Y)61M(21Y)61Y	Complex	40.47	1	N,0;	3	BIII2,CIII2,13XIII3,
TR3	22156	101.86	1238.55	1238.54	3	1.19023	Q9P0K8	FOXJ2_HUMAN	Forkhead box protein J2	42	56	CSPGSPTDPNATLSK	C1dE@CamN10GlcNAcK15dE	51	N4H5F3S0	01Y41Y41M(31M41Y(31F)41L)61M21Y(31F)41L21F	Complex	38.05	1	N,1;	0
TR3	22156	101.86	1238.55	1238.54	3	1.19023	Q9P0K8	FOXJ2_HUMAN	Forkhead box protein J2	42	56	CSPGSPTDPNATLSK	C1dE@CamN10GlcNAcK15dE	51	N4H5F3S0	01Y41Y41M(31M21Y(31F)41L21F)61M61Y41L21F	Complex	36.92	1	N,1;	0
TR1	22125	101.92	1380.62	1380.62	3	-0.903387	P08648	ITA5_HUMAN	Integrin alpha-5	864	878	VTGLNCTTNHPINPK	V1dEN5GlcNAcC6CamK15dE	868	N4H5F3S1	01Y(61F)41Y41M(31M21Y(31F)41L21F)61M61Y41L32S	Complex	75.02	1	N,1;	3	14AI3,BI3,YI4,
TR1	22125	101.92	1380.62	1380.62	3	-0.903387	P08648	ITA5_HUMAN	Integrin alpha-5	864	878	VTGLNCTTNHPINPK	V1dEN5GlcNAcC6CamK15dE	868	N4H5F3S1	01Y(61F)41Y41M(31M(21Y(31F)41L32S)41Y31F)61M61M	Hybrid	66.15	1	N,1;	5	iII3-3-X12/B,BI2,iII3-3-B/Y,C/Z,BI2,iII2-3-B/Y,C/Z,
TR2	22094	102	1192.86	1192.85	3	3.31272	P35613	BASI_HUMAN	Basigin	258	273	ITDSEDKALMNGSESR	I1dEK7dEN11GlcNAc	268	N2H8F0S0	01Y41Y41M(31M21M)61M(31M21M)61M21M	Mannose	255.11	2	N,1;	2	45AI3,iI2-3-B/Y,C/Z,
TR2	22094	102	1192.86	1192.85	3	3.31272	P35613	BASI_HUMAN	Basigin	258	273	ITDSEDKALMNGSESR	I1dEK7dEN11GlcNAc	268	N2H8F0S0	01Y41Y41M(31M21M21M)61M(31M21M)61M	Mannose	255.11	2	N,1;	0
TR2	22094	102	1192.86	1192.85	3	3.31272	P35613	BASI_HUMAN	Basigin	258	273	ITDSEDKALMNGSESR	I1dEK7dEN11GlcNAc	268	N2H8F0S0	01Y41Y41M(31M21M21M31G)61M(31M)61M	Mannose	249.7	1	N,1;	0
TR3	22250	102.33	962.693	962.688	4	4.40017	P08648	ITA5_HUMAN	Integrin alpha-5	864	878	VTGLNCTTNHPINPK	V1dEN5GlcNAcC6CamK15dE	868	N4H5F1S1	01Y41Y41M(31M41Y(31F)41L)61M61Y41L32S	Complex	77.89	1	N,0;	1	iII4-5-A35/Z,
TR1	22217	102.37	1154.52	1154.51	2	8.21338	P16383	GCFC2_HUMAN	GC-rich sequence DNA-binding factor 2	630	635	SAVENK	S1dEN5GlcNAcK6dE	634	N2H7F0S0	01Y41Y41M(31M21M)61M(31M21M)61M	Mannose	112.08	1	N,0;	1	iI2-3-B/Y,C/Z,
TR1	22217	102.37	1154.52	1154.51	2	8.21338	P16383	GCFC2_HUMAN	GC-rich sequence DNA-binding factor 2	630	635	SAVENK	S1dEN5GlcNAcK6dE	634	N2H7F0S0	01Y41Y41M(31M21M21M)61M(31M)61M	Mannose	107.25	1	N,0;	1	iI2-3-B/Y,C/Z,iIII2-3-B/Y,C/Z,
TR1	22225	102.41	1152.01	1152.01	2	4.38503	Q8TF32	ZN431_HUMAN	Zinc finger protein 431	496	501	SSNLTK	S1dEN3GlcNAcK6dE	498	N2H7F0S0	01Y41Y41M(31M21M21M)61M(31M)61M	Mannose	118.45	1	N,0;	1	iI2-3-B/Y,C/Z,iIII2-3-B/Y,C/Z,
TR1	22225	102.41	1152.01	1152.01	2	4.38503	Q14CN2	CLCA4_HUMAN	Calcium-activated chloride channel regulator 4	851	856	SNLTSK	S1dEN2GlcNAcK6dE	852	N2H7F0S0	01Y41Y41M(31M21M21M)61M(31M)61M	Mannose	116.31	1	N,1;	1	iI2-3-B/Y,C/Z,iIII2-3-B/Y,C/Z,
TR1	22225	102.41	1152.01	1152.01	2	4.38503	Q8TF32	ZN431_HUMAN	Zinc finger protein 431	496	501	SSNLTK	S1dEN3GlcNAcK6dE	498	N2H7F0S0	01Y41Y41M(31M)61M(31M21M)61M21M	Mannose	113.66	1	N,0;	2	iI2-3-X45/C,iI2-3-B/Y,C/Z,
TR1	22225	102.41	1152.01	1152.01	2	4.38503	Q14CN2	CLCA4_HUMAN	Calcium-activated chloride channel regulator 4	851	856	SNLTSK	S1dEN2GlcNAcK6dE	852	N2H7F0S0	01Y41Y41M(31M)61M(31M21M)61M21M	Mannose	111.52	1	N,1;	2	iI2-3-X45/C,iI2-3-B/Y,C/Z,
TR1	22249	102.53	1070.98	1070.98	2	0.889852	Q8WXA9	SREK1_HUMAN	Splicing regulatory glutamine/lysine-rich protein 1	454	459	NSTSLK	N1GlcNAc@dEK6dE	454	N2H6F0S0	01Y41Y41M(31M)61M(31M21M)61M	Mannose	84.79	1	N,0;	1	iI2-3-B/Y,C/Z,
TR1	22249	102.53	1070.98	1070.98	2	0.889852	Q6AWC8	YK026_HUMAN	Putative uncharacterized protein LOC100129027	30	35	NTSLSK	N1GlcNAc@dEK6dE	30	N2H6F0S0	01Y41Y41M(31M)61M(31M21M)61M	Mannose	84.79	1	N,0;	1	iI2-3-B/Y,C/Z,
TR1	22249	102.53	1070.98	1070.98	2	0.889852	Q14CN2	CLCA4_HUMAN	Calcium-activated chloride channel regulator 4	851	856	SNLTSK	S1dEN2GlcNAcK6dE	852	N2H6F0S0	01Y41Y41M(31M)61M(31M21M)61M	Mannose	82.72	1	N,2;	1	iI2-3-B/Y,C/Z,
TR1	22249	102.53	1070.98	1070.98	2	0.889852	Q8TF32	ZN431_HUMAN	Zinc finger protein 431	496	501	SSNLTK	S1dEN3GlcNAcK6dE	498	N2H6F0S0	01Y41Y41M(31M)61M(31M21M)61M	Mannose	82.72	1	N,1;	1	iI2-3-B/Y,C/Z,
TR1	22249	102.53	1070.98	1070.98	2	0.889852	Q8WXA9	SREK1_HUMAN	Splicing regulatory glutamine/lysine-rich protein 1	454	459	NSTSLK	N1GlcNAc@dEK6dE	454	N2H6F0S0	01Y41Y41M(31M21M)61M(31M)61M	Mannose	77.79	1	N,0;	2	iI2-3-A34/Y,iI2-3-B/Y,C/Z,
TR1	22249	102.53	1070.98	1070.98	2	0.889852	Q6AWC8	YK026_HUMAN	Putative uncharacterized protein LOC100129027	30	35	NTSLSK	N1GlcNAc@dEK6dE	30	N2H6F0S0	01Y41Y41M(31M21M)61M(31M)61M	Mannose	77.79	1	N,0;	2	iI2-3-A34/Y,iI2-3-B/Y,C/Z,
TR3	22313	102.65	1283.25	1283.25	3	2.08827	P08648	ITA5_HUMAN	Integrin alpha-5	864	878	VTGLNCTTNHPINPK	V1dEN5GlcNAcC6CamK15dE	868	N4H5F1S1	01Y(61F)41Y41M(31M41Y41L)61M61Y41L32S	Complex	164.21	1	N,1;	1	iI3-4-X45/C,
TR3	22313	102.65	1283.25	1283.25	3	2.08827	P08648	ITA5_HUMAN	Integrin alpha-5	864	878	VTGLNCTTNHPINPK	V1dEN5GlcNAcC6CamK15dE	868	N4H5F1S1	01Y(61F)41Y41M(31M41Y41L32S)(41Y)61M61M	Hybrid	145.42	1	N,1;	0
TR1	22273	102.65	872.156	872.158	4	-1.84022	P20645	MPRD_HUMAN	Cation-dependent mannose-6-phosphate receptor	80	95	EAGNHTSGAGLVQINK	E1dEN15GlcNAcK16dE	94	N4H5F1S0	01Y41Y41M(31M(21Y41L)41Y31F)61M61M	Hybrid	57.1	2	N,0;	0
TR1	22273	102.65	872.156	872.158	4	-1.84022	P20645	MPRD_HUMAN	Cation-dependent mannose-6-phosphate receptor	80	95	EAGNHTSGAGLVQINK	E1dEN15GlcNAcK16dE	94	N4H5F1S0	01Y41Y41M(31M)61M(21Y41L21F)61Y41L	Complex	57.1	2	N,0;	0
TR1	22273	102.65	872.156	872.158	4	-1.84022	P20645	MPRD_HUMAN	Cation-dependent mannose-6-phosphate receptor	80	95	EAGNHTSGAGLVQINK	E1dEN4GlcNAcK16dE	83	N4H5F1S0	01Y41Y41M(31M(21Y41L)41Y31F)61M61M	Hybrid	57.1	2	N,2;	0
TR1	22273	102.65	872.156	872.158	4	-1.84022	P20645	MPRD_HUMAN	Cation-dependent mannose-6-phosphate receptor	80	95	EAGNHTSGAGLVQINK	E1dEN4GlcNAcK16dE	83	N4H5F1S0	01Y41Y41M(31M)61M(21Y41L21F)61Y41L	Complex	57.1	2	N,2;	0
TR1	22273	102.65	872.156	872.158	4	-1.84022	P20645	MPRD_HUMAN	Cation-dependent mannose-6-phosphate receptor	80	95	EAGNHTSGAGLVQINK	E1dEN15GlcNAcK16dE	94	N4H5F1S0	01Y41Y41M(31M)61M(21Y(31F)41L)61Y41L	Complex	56.44	1	N,0;	0
TR1	22273	102.65	872.156	872.158	4	-1.84022	P20645	MPRD_HUMAN	Cation-dependent mannose-6-phosphate receptor	80	95	EAGNHTSGAGLVQINK	E1dEN4GlcNAcK16dE	83	N4H5F1S0	01Y41Y41M(31M)61M(21Y(31F)41L)61Y41L	Complex	56.44	1	N,2;	0
TR3	22331	102.74	962.691	962.687	4	4.54974	Q5THJ4	VP13D_HUMAN	Vacuolar protein sorting-associated protein 13D	2318	2330	CKLLYESFSNQTK	C1dE@CamK2dEN10GlcNAcK13dE	2327	N4H5F1S1	01Y(61F)41Y41M(31M)61M(21Y41L32S)61Y41L	Complex	72.85	1	N,0;	1	iII4-5-A12/Y,
TR3	22331	102.74	962.691	962.687	4	4.54974	Q5THJ4	VP13D_HUMAN	Vacuolar protein sorting-associated protein 13D	2318	2330	CKLLYESFSNQTK	C1dE@CamK2dEN10GlcNAcK13dE	2327	N4H5F1S1	01Y(61F)41Y41M(31M41Y41L32S)(41Y)61M61M	Hybrid	67.96	1	N,0;	0
TR3	22331	102.74	962.691	962.688	4	3.51201	Q07343	PDE4B_HUMAN	cAMP-specific 3',5'-cyclic phosphodiesterase 4B	181	195	NNFTILTNLHGTSNK	N1dEN2GlcNAcK15dE	182	N4H5F1S1	01Y(61F)41Y41M(31M41Y41L32S)(41Y)61M61M	Hybrid	60.05	1	N,2;	0
TR3	22331	102.74	962.691	962.688	4	3.51201	Q07343	PDE4B_HUMAN	cAMP-specific 3',5'-cyclic phosphodiesterase 4B	181	195	NNFTILTNLHGTSNK	N1dEN2GlcNAcK15dE	182	N4H5F1S1	01Y(61F)41Y41M(31M41Y41L)61M61Y41L32S	Complex	59.91	1	N,2;	2	iI3-4-X25/B,iI3-4-X45/C,
TR3	22358	102.88	1045.77	1045.77	3	0.802605	O60890	OPHN1_HUMAN	Oligophrenin-1	455	464	NLSEPVMTYR	N1GlcNAc@dE	455	N2H9F0S0	01Y41Y41M(31M21M21M)61M(31M21M)61M21M	Mannose	39.93	1	N,0;	1	iIII3-3-X12/C,
TR2	22323	103.07	1236.05	1236.04	2	8.80666	Q6UWU4	CF089_HUMAN	Bombesin receptor-activated protein C6orf89	257	262	DASLNK	D1dEN5GlcNAcK6dE	261	N2H8F0S0	01Y41Y41M(31M21M21M)61M(31M21M)61M	Mannose	153.62	1	N,1;	0
TR2	22323	103.07	1236.05	1236.04	2	8.80666	Q9H2Y7	ZN106_HUMAN	Zinc finger protein 106	366	371	DITGNK	D1dEN5GlcNAcK6dE	370	N2H8F0S0	01Y41Y41M(31M21M21M)61M(31M21M)61M	Mannose	153.62	1	N,1;	0
TR2	22323	103.07	1236.05	1236.04	2	8.80666	P16383	GCFC2_HUMAN	GC-rich sequence DNA-binding factor 2	630	635	SAVENK	S1dEN5GlcNAcK6dE	634	N2H8F0S0	01Y41Y41M(31M21M21M)61M(31M21M)61M	Mannose	153.62	1	N,1;	0
TR2	22323	103.07	1236.05	1236.04	2	8.80666	Q6UWU4	CF089_HUMAN	Bombesin receptor-activated protein C6orf89	257	262	DASLNK	D1dEN5GlcNAcK6dE	261	N2H8F0S0	01Y41Y41M(31M21M)61M(31M21M)61M21M	Mannose	148.68	1	N,1;	1	iI2-3-B/Y,C/Z,
TR2	22323	103.07	1236.05	1236.04	2	8.80666	Q9H2Y7	ZN106_HUMAN	Zinc finger protein 106	366	371	DITGNK	D1dEN5GlcNAcK6dE	370	N2H8F0S0	01Y41Y41M(31M21M)61M(31M21M)61M21M	Mannose	148.68	1	N,1;	1	iI2-3-B/Y,C/Z,
TR2	22323	103.07	1236.05	1236.04	2	8.80666	P16383	GCFC2_HUMAN	GC-rich sequence DNA-binding factor 2	630	635	SAVENK	S1dEN5GlcNAcK6dE	634	N2H8F0S0	01Y41Y41M(31M21M)61M(31M21M)61M21M	Mannose	148.68	1	N,1;	1	iI2-3-B/Y,C/Z,
TR3	22413	103.15	1192.86	1192.85	3	4.14745	Q9Y2I7	FYV1_HUMAN	1-phosphatidylinositol 3-phosphate 5-kinase	1712	1728	SSSPIRLPEMSGGQTNR	S1dEN16GlcNAc	1727	N2H8F0S0	01Y41Y41M(31M21M)61M(31M21M)61M21M	Mannose	193.25	1	N,3;	1	iI2-3-B/Y,C/Z,
TR3	22413	103.15	1192.86	1192.85	3	4.14745	Q9Y2I7	FYV1_HUMAN	1-phosphatidylinositol 3-phosphate 5-kinase	1712	1728	SSSPIRLPEMSGGQTNR	S1dEN16GlcNAc	1727	N2H8F0S0	01Y41Y41M(31M21M21M)61M(31M21M)61M	Mannose	190.6	1	N,3;	0
TR2	22382	103.36	1377.92	1377.91	3	3.66485	P30685	1B35_HUMAN	HLA class I histocompatibility antigen, B-35 alpha chain	107	121	GYYNQSEAGSHIIQR	G1dEN4GlcNAc	110	N4H5F1S2	01Y(61F)41Y41M(31M)61M(21Y41L32S)61Y41L32S	Complex	117.09	1	N,0;	0
TR2	22382	103.36	1377.92	1377.91	3	3.66485	P30685	1B35_HUMAN	HLA class I histocompatibility antigen, B-35 alpha chain	107	121	GYYNQSEAGSHIIQR	G1dEN4GlcNAc	110	N4H5F1S2	01Y41Y41M(31M)61M(21Y(31F)41L32S)61Y41L32S	Complex	106.57	1	N,0;	0
TR2	22388	103.39	1034.19	1034.19	4	-3.45777	P30685	1B35_HUMAN	HLA class I histocompatibility antigen, B-35 alpha chain	107	121	GYYNQSEAGSHIIQR	G1dEN4GlcNAc	110	N6H7F0S0	01Y41Y41M(31M41Y41L)61M(21Y41L31Y41L)61Y41L	Complex	75.42	1	N,0;	0
TR2	22388	103.39	1034.19	1034.19	4	-3.45777	P30685	1B35_HUMAN	HLA class I histocompatibility antigen, B-35 alpha chain	107	121	GYYNQSEAGSHIIQR	G1dEN4GlcNAc	110	N6H7F0S0	01Y41Y41M(31M)61M(21Y41L31Y41L)61Y41L31Y41L	Complex	73.62	1	N,0;	0
TR1	22434	103.43	1277.08	1277.07	2	3.31102	O95372	LYPA2_HUMAN	Acyl-protein thioesterase 2	154	164	AFPQAANGSAK	A1dEN7GlcNAcK11dE	160	N2H6F0S0	01Y41Y41M(31M)61M(31M21M)61M	Mannose	98.93	1	N,1;	2	iI2-3-X35/B,iI2-3-B/Y,C/Z,
TR1	22434	103.43	1277.08	1277.07	2	3.31102	O95372	LYPA2_HUMAN	Acyl-protein thioesterase 2	154	164	AFPQAANGSAK	A1dEN7GlcNAcK11dE	160	N2H6F0S0	01Y41Y41M(31M21M)61M(31M)61M	Mannose	96.47	1	N,1;	2	iI2-3-A34/Y,iI2-3-B/Y,C/Z,
TR1	22434	103.43	1277.08	1277.08	2	2.00256	O14867	BACH1_HUMAN	Transcription regulator protein BACH1	615	623	QNLTGLCQK	Q1dEN2GlcNAcC7CamK9dE	616	N2H6F0S0	01Y41Y41M(31M)61M(31M21M)61M	Mannose	93.89	1	N,1;	2	iI2-3-X35/B,iI2-3-B/Y,C/Z,
TR1	22434	103.43	1277.08	1277.08	2	2.00256	O14867	BACH1_HUMAN	Transcription regulator protein BACH1	615	623	QNLTGLCQK	Q1dEN2GlcNAcC7CamK9dE	616	N2H6F0S0	01Y41Y41M(31M21M)61M(31M)61M	Mannose	91.43	1	N,1;	2	iI2-3-A34/Y,iI2-3-B/Y,C/Z,
TR1	22434	103.43	1277.59	1277.57	2	13.5064	P46013	KI67_HUMAN	Proliferation marker protein Ki-67	3235	3243	KAEDNVCVK	K1dEN5GlcNAcC7CamK9dE	3239	N2H6F0S0	01Y41Y41M(31M)61M(31M21M)61M	Mannose	86.85	2	N,0;	2	iI2-3-X35/B,iI2-3-B/Y,C/Z,
TR1	22434	103.43	1277.59	1277.57	2	13.5064	P46013	KI67_HUMAN	Proliferation marker protein Ki-67	3235	3243	KAEDNVCVK	K1dEN5GlcNAcC7CamK9dE	3239	N2H6F0S0	01Y41Y41M(31M21M)61M(31M)61M	Mannose	86.85	2	N,0;	2	iI2-3-A34/Y,iI2-3-B/Y,C/Z,
TR1	22434	103.43	1277.08	1277.09	2	-5.23894	Q29983	MICA_HUMAN	MHC class I polypeptide-related sequence A	204	213	TVPPMVNVTR	T1dEN7GlcNAc	210	N2H6F0S0	01Y41Y41M(31M)61M(31M21M)61M	Mannose	78.96	1	N,1;	2	iI2-3-X35/B,iI2-3-B/Y,C/Z,
TR1	22434	103.43	1277.59	1277.57	2	14.8143	Q16821	PPR3A_HUMAN	Protein phosphatase 1 regulatory subunit 3A	909	918	APQNSSPFSK	A1dEN4GlcNAcK10dE	912	N2H6F0S0	01Y41Y41M(31M)61M(31M21M)61M	Mannose	74.27	2	N,0;	2	iI2-3-X35/B,iI2-3-B/Y,C/Z,
TR1	22434	103.43	1277.59	1277.57	2	14.8143	Q16821	PPR3A_HUMAN	Protein phosphatase 1 regulatory subunit 3A	909	918	APQNSSPFSK	A1dEN4GlcNAcK10dE	912	N2H6F0S0	01Y41Y41M(31M21M)61M(31M)61M	Mannose	74.27	2	N,0;	2	iI2-3-A34/Y,iI2-3-B/Y,C/Z,
TR1	22434	103.43	1277.08	1277.09	2	-5.23894	Q29983	MICA_HUMAN	MHC class I polypeptide-related sequence A	204	213	TVPPMVNVTR	T1dEN7GlcNAc	210	N2H6F0S0	01Y41Y41M(31M21M)61M(31M)61M	Mannose	74.14	1	N,1;	2	iI2-3-A34/Y,iI2-3-B/Y,C/Z,
TR2	22398	103.44	1152.01	1152.01	2	4.91485	Q8WXA9	SREK1_HUMAN	Splicing regulatory glutamine/lysine-rich protein 1	454	459	NSTSLK	N1GlcNAc@dEK6dE	454	N2H7F0S0	01Y41Y41M(31M)61M(31M21M)61M21M	Mannose	109.02	1	N,0;	4	iI2-3-X35/B,iI2-3-X04/B,iI2-3-X45/C,iI2-3-B/Y,C/Z,
TR2	22398	103.44	1152.01	1152.01	2	4.91485	Q6AWC8	YK026_HUMAN	Putative uncharacterized protein LOC100129027	30	35	NTSLSK	N1GlcNAc@dEK6dE	30	N2H7F0S0	01Y41Y41M(31M)61M(31M21M)61M21M	Mannose	109.02	1	N,0;	4	iI2-3-X35/B,iI2-3-X04/B,iI2-3-X45/C,iI2-3-B/Y,C/Z,
TR2	22398	103.44	1152.01	1152.01	2	4.91485	Q14CN2	CLCA4_HUMAN	Calcium-activated chloride channel regulator 4	851	856	SNLTSK	S1dEN2GlcNAcK6dE	852	N2H7F0S0	01Y41Y41M(31M21M)61M(31M21M)61M	Mannose	108.79	2	N,1;	1	iI2-3-B/Y,C/Z,
TR2	22398	103.44	1152.01	1152.01	2	4.91485	Q8WXA9	SREK1_HUMAN	Splicing regulatory glutamine/lysine-rich protein 1	454	459	NSTSLK	N1GlcNAc@dEK6dE	454	N2H7F0S0	01Y41Y41M(31M21M)61M(31M21M)61M	Mannose	106.65	2	N,0;	1	iI2-3-B/Y,C/Z,
TR2	22398	103.44	1152.01	1152.01	2	4.91485	Q8WXA9	SREK1_HUMAN	Splicing regulatory glutamine/lysine-rich protein 1	454	459	NSTSLK	N1GlcNAc@dEK6dE	454	N2H7F0S0	01Y41Y41M(31M21M21M)61M(31M)61M	Mannose	106.65	2	N,0;	1	iI2-3-B/Y,C/Z,iIII2-3-B/Y,C/Z,
TR2	22398	103.44	1152.01	1152.01	2	4.91485	Q6AWC8	YK026_HUMAN	Putative uncharacterized protein LOC100129027	30	35	NTSLSK	N1GlcNAc@dEK6dE	30	N2H7F0S0	01Y41Y41M(31M21M)61M(31M21M)61M	Mannose	106.65	2	N,0;	1	iI2-3-B/Y,C/Z,
TR2	22398	103.44	1152.01	1152.01	2	4.91485	Q6AWC8	YK026_HUMAN	Putative uncharacterized protein LOC100129027	30	35	NTSLSK	N1GlcNAc@dEK6dE	30	N2H7F0S0	01Y41Y41M(31M21M21M)61M(31M)61M	Mannose	106.65	2	N,0;	1	iI2-3-B/Y,C/Z,iIII2-3-B/Y,C/Z,
TR2	22398	103.44	1152.01	1152.01	2	4.91485	Q8TF32	ZN431_HUMAN	Zinc finger protein 431	496	501	SSNLTK	S1dEN3GlcNAcK6dE	498	N2H7F0S0	01Y41Y41M(31M21M)61M(31M21M)61M	Mannose	104.59	2	N,0;	1	iI2-3-B/Y,C/Z,
TR2	22422	103.56	1070.99	1070.98	2	6.8168	Q14CN2	CLCA4_HUMAN	Calcium-activated chloride channel regulator 4	851	856	SNLTSK	S1dEN2GlcNAcK6dE	852	N2H6F0S0	01Y41Y41M(31M21M)61M(31M)61M	Mannose	77.95	1	N,1;	2	iI2-3-A34/Y,iI2-3-B/Y,C/Z,
TR2	22422	103.56	1070.99	1070.98	2	6.8168	Q8TF32	ZN431_HUMAN	Zinc finger protein 431	496	501	SSNLTK	S1dEN3GlcNAcK6dE	498	N2H6F0S0	01Y41Y41M(31M21M)61M(31M)61M	Mannose	77.95	1	N,0;	2	iI2-3-A34/Y,iI2-3-B/Y,C/Z,
TR1	22468	103.6	983.452	983.452	4	-0.00362244	O75976	CBPD_HUMAN	Carboxypeptidase D	1060	1077	GKDLDTDFTNNASQPETK	G1dEK2dEN11GlcNAcK18dE	1070	N4H5F1S0	01Y(61F)41Y41M(31M(21Y41L)41Y)61M61M	Hybrid	48.6	2	N,0;	0
TR1	22468	103.6	983.452	983.452	4	-0.00362244	O75976	CBPD_HUMAN	Carboxypeptidase D	1060	1077	GKDLDTDFTNNASQPETK	G1dEK2dEN11GlcNAcK18dE	1070	N4H5F1S0	01Y41Y41M(31M)61M(21Y(31F)41L)61Y41L	Complex	48.6	2	N,0;	0
TR1	22468	103.6	983.452	983.452	4	-0.00362244	O75976	CBPD_HUMAN	Carboxypeptidase D	1060	1077	GKDLDTDFTNNASQPETK	G1dEK2dEN11GlcNAcK18dE	1070	N4H5F1S0	01Y41Y41M(31M)61M(21Y41L21F)61Y41L	Complex	47.81	1	N,0;	0
TR1	22472	103.62	1310.94	1310.93	3	3.16426	O75976	CBPD_HUMAN	Carboxypeptidase D	1060	1077	GKDLDTDFTNNASQPETK	G1dEK2dEN11GlcNAcK18dE	1070	N4H5F1S0	01Y41Y41M(31M41Y41L)61M61Y41L21F	Complex	121.42	1	N,0;	0
TR3	22516	103.64	1084.82	1084.83	3	-4.23815	P26367-2	PAX6_HUMAN	Isoform 5a of Paired box protein Pax-6	54	69	VQVLDNQNVSNGCVSK	V1dEN11GlcNAcC13CamK16dE	64	N2H6F0S0	01Y41Y41M(31M)61M(31M21M)61M	Mannose	147.04	1	N,0;	3	iI2-3-X15/C,iI2-3-X45/C,iI2-3-B/Y,C/Z,
TR3	22516	103.64	1084.82	1084.83	3	-4.23815	P26367-2	PAX6_HUMAN	Isoform 5a of Paired box protein Pax-6	54	69	VQVLDNQNVSNGCVSK	V1dEN8GlcNAcC13CamK16dE	61	N2H6F0S0	01Y41Y41M(31M)61M(31M21M)61M	Mannose	147.04	1	N,0;	3	iI2-3-X15/C,iI2-3-X45/C,iI2-3-B/Y,C/Z,
TR3	22516	103.64	1084.82	1084.83	3	-4.42435	Q8IYP9	ZDH23_HUMAN	Palmitoyltransferase ZDHHC23	223	239	GFPGADMSGSLNNRTTK	G1dEN13GlcNAcK17dE	235	N2H6F0S0	01Y41Y41M(31M)61M(31M21M)61M	Mannose	144.84	1	N,0;	3	iI2-3-X15/C,iI2-3-X45/C,iI2-3-B/Y,C/Z,
TR3	22516	103.64	1084.82	1084.83	3	-4.23815	P26367-2	PAX6_HUMAN	Isoform 5a of Paired box protein Pax-6	54	69	VQVLDNQNVSNGCVSK	V1dEN11GlcNAcC13CamK16dE	64	N2H6F0S0	01Y41Y41M(31M21M)61M(31M)61M	Mannose	134.61	1	N,0;	2	iI2-3-A34/Y,iI2-3-B/Y,C/Z,
TR3	22516	103.64	1084.82	1084.83	3	-4.23815	P26367-2	PAX6_HUMAN	Isoform 5a of Paired box protein Pax-6	54	69	VQVLDNQNVSNGCVSK	V1dEN8GlcNAcC13CamK16dE	61	N2H6F0S0	01Y41Y41M(31M21M)61M(31M)61M	Mannose	134.61	1	N,0;	2	iI2-3-A34/Y,iI2-3-B/Y,C/Z,
TR3	22516	103.64	1084.82	1084.83	3	-4.42435	Q8IYP9	ZDH23_HUMAN	Palmitoyltransferase ZDHHC23	223	239	GFPGADMSGSLNNRTTK	G1dEN13GlcNAcK17dE	235	N2H6F0S0	01Y41Y41M(31M21M)61M(31M)61M	Mannose	132.41	1	N,0;	2	iI2-3-A34/Y,iI2-3-B/Y,C/Z,
TR3	22516	103.64	1084.82	1084.82	3	3.50137	Q9Y2I7	FYV1_HUMAN	1-phosphatidylinositol 3-phosphate 5-kinase	1712	1728	SSSPIRLPEMSGGQTNR	S1dEN16GlcNAc	1727	N2H6F0S0	01Y41Y41M(31M)61M(31M21M)61M	Mannose	118.83	2	N,2;	3	iI2-3-X15/C,iI2-3-X45/C,iI2-3-B/Y,C/Z,
TR3	22516	103.64	1084.82	1084.82	3	3.50137	Q9Y2I7	FYV1_HUMAN	1-phosphatidylinositol 3-phosphate 5-kinase	1712	1728	SSSPIRLPEMSGGQTNR	S1dEN16GlcNAc	1727	N2H6F0S0	01Y41Y41M(31M21M)61M(31M)61M	Mannose	118.83	2	N,2;	2	iI2-3-A34/Y,iI2-3-B/Y,C/Z,
TR3	22516	103.64	1085.16	1085.15	3	4.26594	Q14789	GOGB1_HUMAN	Golgin subfamily B member 1	2940	2953	QENLSWQHELHQLR	Q1dEN3GlcNAc	2942	N2H6F0S0	01Y41Y41M(31M21M)61M(31M)61M	Mannose	105.8	1	N,0;	2	iI2-3-A34/Y,iI2-3-B/Y,C/Z,
TR3	22516	103.64	1085.16	1085.15	3	4.26594	Q14789	GOGB1_HUMAN	Golgin subfamily B member 1	2940	2953	QENLSWQHELHQLR	Q1dEN3GlcNAc	2942	N2H6F0S0	01Y41Y41M(31M)61M(31M21M)61M	Mannose	96.44	1	N,0;	3	iI2-3-X15/C,iI2-3-X45/C,iI2-3-B/Y,C/Z,
TR1	22539	103.94	987.094	987.1	3	-5.78115	Q5TC84	OGRL1_HUMAN	Opioid growth factor receptor-like protein 1	351	361	NSSSAVHLNSK	N1GlcNAc@dEK11dE	351	N2H8F0S0	01Y41Y41M(31M21M)61M(31M21M)61M21M	Mannose	87.31	2	N,0;	3	iI2-3-X45/B,45AI3,iI2-3-B/Y,C/Z,
TR1	22539	103.94	987.094	987.1	3	-5.78115	Q5TC84	OGRL1_HUMAN	Opioid growth factor receptor-like protein 1	351	361	NSSSAVHLNSK	N1GlcNAc@dEK11dE	351	N2H8F0S0	01Y41Y41M(31M21M21M)61M(31M21M)61M	Mannose	87.31	2	N,0;	0
TR1	22539	103.94	987.094	987.094	3	0.223304	Q6VAB6	KSR2_HUMAN	Kinase suppressor of Ras 2	153	163	NVHMSGGNLSK	N1dEN8GlcNAcK11dE	160	N2H8F0S0	01Y41Y41M(31M21M)61M(31M21M)61M21M	Mannose	85.04	2	N,0;	3	iI2-3-X45/B,45AI3,iI2-3-B/Y,C/Z,
TR1	22539	103.94	987.094	987.094	3	0.223304	Q6VAB6	KSR2_HUMAN	Kinase suppressor of Ras 2	153	163	NVHMSGGNLSK	N1dEN8GlcNAcK11dE	160	N2H8F0S0	01Y41Y41M(31M21M21M)61M(31M21M)61M	Mannose	85.04	2	N,0;	0
TR1	22539	103.94	987.094	987.1	3	-5.78115	Q5TC84	OGRL1_HUMAN	Opioid growth factor receptor-like protein 1	351	361	NSSSAVHLNSK	N1GlcNAc@dEK11dE	351	N2H8F0S0	01Y41Y41M(31M21M21M31G)61M(31M)61M	Mannose	83.1	1	N,0;	2	iIII3-3-X12/B,iI2-3-X25/C,
TR1	22539	103.94	987.094	987.094	3	0.223304	Q6VAB6	KSR2_HUMAN	Kinase suppressor of Ras 2	153	163	NVHMSGGNLSK	N1dEN8GlcNAcK11dE	160	N2H8F0S0	01Y41Y41M(31M21M21M31G)61M(31M)61M	Mannose	80.83	1	N,0;	2	iIII3-3-X12/B,iI2-3-X25/C,
TR3	22588	103.99	1233.04	1233.03	2	7.61886	Q14CN2	CLCA4_HUMAN	Calcium-activated chloride channel regulator 4	851	856	SNLTSK	S1dEN2GlcNAcK6dE	852	N2H8F0S0	01Y41Y41M(31M21M)61M(31M21M)61M21M	Mannose	165.16	1	N,1;	2	iI2-3-B/Y,C/Z,45AI4,
TR3	22588	103.99	1233.04	1233.03	2	7.61886	Q8WXA9	SREK1_HUMAN	Splicing regulatory glutamine/lysine-rich protein 1	454	459	NSTSLK	N1GlcNAc@dEK6dE	454	N2H8F0S0	01Y41Y41M(31M21M)61M(31M21M)61M21M	Mannose	162.92	1	N,0;	2	iI2-3-B/Y,C/Z,45AI4,
TR3	22588	103.99	1233.04	1233.03	2	7.61886	Q6AWC8	YK026_HUMAN	Putative uncharacterized protein LOC100129027	30	35	NTSLSK	N1GlcNAc@dEK6dE	30	N2H8F0S0	01Y41Y41M(31M21M)61M(31M21M)61M21M	Mannose	162.92	1	N,0;	2	iI2-3-B/Y,C/Z,45AI4,
TR3	22588	103.99	1233.04	1233.03	2	7.61886	Q8TF32	ZN431_HUMAN	Zinc finger protein 431	496	501	SSNLTK	S1dEN3GlcNAcK6dE	498	N2H8F0S0	01Y41Y41M(31M21M)61M(31M21M)61M21M	Mannose	162.92	1	N,0;	2	iI2-3-B/Y,C/Z,45AI4,
TR3	22588	103.99	1233.04	1233.03	2	7.61886	Q14CN2	CLCA4_HUMAN	Calcium-activated chloride channel regulator 4	851	856	SNLTSK	S1dEN2GlcNAcK6dE	852	N2H8F0S0	01Y41Y41M(31M21M21M)61M(31M21M)61M	Mannose	162.67	1	N,1;	0
TR3	22588	103.99	1233.04	1233.03	2	7.61886	Q8WXA9	SREK1_HUMAN	Splicing regulatory glutamine/lysine-rich protein 1	454	459	NSTSLK	N1GlcNAc@dEK6dE	454	N2H8F0S0	01Y41Y41M(31M21M21M)61M(31M21M)61M	Mannose	160.43	1	N,0;	0
TR3	22588	103.99	1233.04	1233.03	2	7.61886	Q6AWC8	YK026_HUMAN	Putative uncharacterized protein LOC100129027	30	35	NTSLSK	N1GlcNAc@dEK6dE	30	N2H8F0S0	01Y41Y41M(31M21M21M)61M(31M21M)61M	Mannose	160.43	1	N,0;	0
TR3	22588	103.99	1233.04	1233.03	2	7.61886	Q8TF32	ZN431_HUMAN	Zinc finger protein 431	496	501	SSNLTK	S1dEN3GlcNAcK6dE	498	N2H8F0S0	01Y41Y41M(31M21M21M)61M(31M21M)61M	Mannose	160.43	1	N,0;	0
TR3	22588	103.99	1234.05	1234.04	2	5.07284	P25391	LAMA1_HUMAN	Laminin subunit alpha-1	2046	2051	VNTTLR	V1dEN2GlcNAc	2047	N2H8F0S0	01Y41Y41M(31M21M)61M(31M21M)61M21M	Mannose	118.89	1	N,0;	2	iI2-3-B/Y,C/Z,45AI4,
TR3	22588	103.99	1234.05	1234.04	2	5.07284	P25391	LAMA1_HUMAN	Laminin subunit alpha-1	2046	2051	VNTTLR	V1dEN2GlcNAc	2047	N2H8F0S0	01Y41Y41M(31M21M21M)61M(31M21M)61M	Mannose	114.22	1	N,0;	0
TR3	22588	103.99	1234.05	1234.04	2	5.07284	P57075	UBS3A_HUMAN	Ubiquitin-associated and SH3 domain-containing protein A	206	211	LSNLTR	L1dEN3GlcNAc	208	N2H8F0S0	01Y41Y41M(31M21M)61M(31M21M)61M21M	Mannose	114.15	1	N,0;	2	iI2-3-B/Y,C/Z,45AI4,
TR3	22588	103.99	1234.05	1234.04	2	5.07284	Q13077	TRAF1_HUMAN	TNF receptor-associated factor 1	273	278	ITNVTR	I1dEN3GlcNAc	275	N2H8F0S0	01Y41Y41M(31M21M)61M(31M21M)61M21M	Mannose	111.86	1	N,0;	2	iI2-3-B/Y,C/Z,45AI4,
TR3	22588	103.99	1234.05	1234.04	2	5.07284	Q9H3P2	NELFA_HUMAN	Negative elongation factor A	430	435	NLSLTR	N1GlcNAc@dE	430	N2H8F0S0	01Y41Y41M(31M21M)61M(31M21M)61M21M	Mannose	111.86	1	N,0;	2	iI2-3-B/Y,C/Z,45AI4,
TR3	22588	103.99	1234.05	1234.04	2	5.07284	P57075	UBS3A_HUMAN	Ubiquitin-associated and SH3 domain-containing protein A	206	211	LSNLTR	L1dEN3GlcNAc	208	N2H8F0S0	01Y41Y41M(31M21M21M)61M(31M21M)61M	Mannose	109.48	1	N,0;	0
TR3	22588	103.99	1234.05	1234.04	2	5.07284	Q03001	DYST_HUMAN	Dystonin	687	692	LLNTSR	L1dEN3GlcNAc	689	N2H8F0S0	01Y41Y41M(31M21M)61M(31M21M)61M21M	Mannose	107.45	1	N,1;	2	iI2-3-B/Y,C/Z,45AI4,
TR3	22588	103.99	1234.05	1234.04	2	5.07284	O95274	LYPD3_HUMAN	Ly6/PLAUR domain-containing protein 3	117	122	LNLTSR	L1dEN2GlcNAc	118	N2H8F0S0	01Y41Y41M(31M21M)61M(31M21M)61M21M	Mannose	107.45	1	N,1;	2	iI2-3-B/Y,C/Z,45AI4,
TR3	22588	103.99	1234.05	1234.04	2	5.07284	Q13077	TRAF1_HUMAN	TNF receptor-associated factor 1	273	278	ITNVTR	I1dEN3GlcNAc	275	N2H8F0S0	01Y41Y41M(31M21M21M)61M(31M21M)61M	Mannose	107.19	1	N,0;	0
TR3	22588	103.99	1234.05	1234.04	2	5.07284	Q9H3P2	NELFA_HUMAN	Negative elongation factor A	430	435	NLSLTR	N1GlcNAc@dE	430	N2H8F0S0	01Y41Y41M(31M21M21M)61M(31M21M)61M	Mannose	107.19	1	N,0;	0
TR3	22588	103.99	1234.05	1234.04	2	5.07284	Q03001	DYST_HUMAN	Dystonin	687	692	LLNTSR	L1dEN3GlcNAc	689	N2H8F0S0	01Y41Y41M(31M21M21M)61M(31M21M)61M	Mannose	102.78	1	N,1;	0
TR3	22588	103.99	1234.05	1234.04	2	5.07284	O95274	LYPD3_HUMAN	Ly6/PLAUR domain-containing protein 3	117	122	LNLTSR	L1dEN2GlcNAc	118	N2H8F0S0	01Y41Y41M(31M21M21M)61M(31M21M)61M	Mannose	102.78	1	N,1;	0
TR1	22552	104.01	1075.81	1075.81	3	5.08901	A6NHR9	SMHD1_HUMAN	Structural maintenance of chromosomes flexible hinge domain-containing protein 1	1708	1717	RSCTLPNYTK	R1dEC3CamN7GlcNAcK10dE	1714	N2H9F0S0	01Y41Y41M(31M21M21M)61M(31M21M)61M21M	Mannose	35.1	2	N,1;	0
TR1	22552	104.01	1075.81	1075.81	3	5.08901	A6NHR9	SMHD1_HUMAN	Structural maintenance of chromosomes flexible hinge domain-containing protein 1	1708	1717	RSCTLPNYTK	R1dEC3CamN7GlcNAcK10dE	1714	N2H9F0S0	01Y41Y41M(31M21M21M31G)61M(31M21M)61M	Mannose	35.1	2	N,1;	0
TR2	22527	104.07	1358.11	1358.11	2	-1.55048	Q29983	MICA_HUMAN	MHC class I polypeptide-related sequence A	204	213	TVPPMVNVTR	T1dEN7GlcNAc	210	N2H7F0S0	01Y41Y41M(31M21M)61M(31M21M)61M	Mannose	146.6	1	N,1;	1	iI2-3-B/Y,C/Z,
TR2	22527	104.07	1358.11	1358.11	2	-1.55048	Q29983	MICA_HUMAN	MHC class I polypeptide-related sequence A	204	213	TVPPMVNVTR	T1dEN7GlcNAc	210	N2H7F0S0	01Y41Y41M(31M)61M(31M21M)61M21M	Mannose	138.9	1	N,1;	1	iI2-3-B/Y,C/Z,
TR2	22527	104.07	1358.61	1358.59	2	12.5714	P46013	KI67_HUMAN	Proliferation marker protein Ki-67	3235	3243	KAEDNVCVK	K1dEN5GlcNAcC7CamK9dE	3239	N2H7F0S0	01Y41Y41M(31M21M)61M(31M21M)61M	Mannose	113.26	1	N,0;	1	iI2-3-B/Y,C/Z,
TR2	22527	104.07	1358.61	1358.59	2	12.5714	P46013	KI67_HUMAN	Proliferation marker protein Ki-67	3235	3243	KAEDNVCVK	K1dEN5GlcNAcC7CamK9dE	3239	N2H7F0S0	01Y41Y41M(31M)61M(31M21M)61M21M	Mannose	105.95	1	N,0;	1	iI2-3-B/Y,C/Z,
TR3	22651	104.3	1154.52	1154.51	2	6.83885	P16383	GCFC2_HUMAN	GC-rich sequence DNA-binding factor 2	630	635	SAVENK	S1dEN5GlcNAcK6dE	634	N2H7F0S0	01Y41Y41M(31M)61M(31M21M)61M21M	Mannose	60.08	1	N,1;	1	iI2-3-B/Y,C/Z,
TR3	22664	104.37	1233.04	1233.03	2	7.81686	Q8TF32	ZN431_HUMAN	Zinc finger protein 431	496	501	SSNLTK	S1dEN3GlcNAcK6dE	498	N2H8F0S0	01Y41Y41M(31M21M21M31G)61M(31M)61M	Mannose	125.39	1	N,0;	0
TR3	22665	104.37	1162.55	1162.54	3	3.76098	P20645	MPRD_HUMAN	Cation-dependent mannose-6-phosphate receptor	80	95	EAGNHTSGAGLVQINK	E1dEN15GlcNAcK16dE	94	N4H5F1S0	01Y(61F)41Y41M(31M41Y41L)61M61Y41L	Complex	118.28	1	N,0;	0
TR3	22665	104.37	1162.55	1162.54	3	3.76098	P20645	MPRD_HUMAN	Cation-dependent mannose-6-phosphate receptor	80	95	EAGNHTSGAGLVQINK	E1dEN4GlcNAcK16dE	83	N4H5F1S0	01Y(61F)41Y41M(31M41Y41L)61M61Y41L	Complex	118.28	1	N,2;	0
TR3	22665	104.37	1162.55	1162.54	3	3.76098	P20645	MPRD_HUMAN	Cation-dependent mannose-6-phosphate receptor	80	95	EAGNHTSGAGLVQINK	E1dEN15GlcNAcK16dE	94	N4H5F1S0	01Y41Y41M(31M41Y(31F)41L)61M61Y41L	Complex	111.68	1	N,0;	0
TR3	22665	104.37	1162.55	1162.54	3	3.76098	P20645	MPRD_HUMAN	Cation-dependent mannose-6-phosphate receptor	80	95	EAGNHTSGAGLVQINK	E1dEN4GlcNAcK16dE	83	N4H5F1S0	01Y41Y41M(31M41Y(31F)41L)61M61Y41L	Complex	111.68	1	N,2;	0
TR2	22590	104.37	1056.45	1056.45	3	0.289249	Q8N766	EMC1_HUMAN	ER membrane protein complex subunit 1	909	918	FINYNQTVSR	F1dEN5GlcNAc	913	N2H9F0S0	01Y41Y41M(31M21M21M)61M(31M21M)61M21M	Mannose	109.99	1	N,4;	1	iI2-3-X45/C,
TR2	22590	104.37	1056.45	1056.45	3	0.289249	Q8N766	EMC1_HUMAN	ER membrane protein complex subunit 1	909	918	FINYNQTVSR	F1dEN5GlcNAc	913	N2H9F0S0	01Y41Y41M(31M21M21M31G)61M(31M21M)61M	Mannose	105.85	1	N,4;	1	iIII3-3-X12/B,
TR2	22590	104.37	1056.45	1056.45	3	-2.01374	O75346	ZN253_HUMAN	Zinc finger protein 253	460	469	AFNWSSDLNK	A1dEN3GlcNAcK10dE	462	N2H9F0S0	01Y41Y41M(31M21M21M)61M(31M21M)61M21M	Mannose	90.38	1	N,1;	1	iI2-3-X45/C,
TR2	22590	104.37	1056.45	1056.45	3	1.5709	Q6PRD1	GP179_HUMAN	Probable G-protein coupled receptor 179	817	828	SASAHNLTVGER	S1dEN6GlcNAc	822	N2H9F0S0	01Y41Y41M(31M21M21M)61M(31M21M)61M21M	Mannose	90.12	1	N,0;	1	iI2-3-X45/C,
TR2	22590	104.37	1056.45	1056.45	3	-0.538994	Q8WW38	FOG2_HUMAN	Zinc finger protein ZFPM2	1107	1119	GVNGSSQAPTSGK	G1dEN3GlcNAcK13dE	1109	N2H9F0S0	01Y41Y41M(31M21M21M)61M(31M21M)61M21M	Mannose	89.58	1	N,1;	1	iI2-3-X45/C,
TR2	22590	104.37	1056.45	1056.45	3	-2.01374	O75346	ZN253_HUMAN	Zinc finger protein 253	460	469	AFNWSSDLNK	A1dEN3GlcNAcK10dE	462	N2H9F0S0	01Y41Y41M(31M21M21M31G)61M(31M21M)61M	Mannose	88.26	1	N,1;	1	iIII3-3-X12/B,
TR2	22590	104.37	1056.45	1056.45	3	1.5709	Q6PRD1	GP179_HUMAN	Probable G-protein coupled receptor 179	817	828	SASAHNLTVGER	S1dEN6GlcNAc	822	N2H9F0S0	01Y41Y41M(31M21M21M31G)61M(31M21M)61M	Mannose	88	1	N,0;	1	iIII3-3-X12/B,
TR2	22590	104.37	1056.45	1056.45	3	1.30965	Q9NQR9-2	G6PC2_HUMAN	Isoform 2 of Glucose-6-phosphatase 2	83	92	ILCLVCHGNR	I1dEC3CamC6CamN9GlcNAc	91	N2H9F0S0	01Y41Y41M(31M21M21M)61M(31M21M)61M21M	Mannose	86.05	1	N,0;	1	iI2-3-X45/C,
TR2	22590	104.37	1056.45	1056.45	3	-0.538994	Q8WW38	FOG2_HUMAN	Zinc finger protein ZFPM2	1107	1119	GVNGSSQAPTSGK	G1dEN3GlcNAcK13dE	1109	N2H9F0S0	01Y41Y41M(31M21M21M31G)61M(31M21M)61M	Mannose	85.44	1	N,1;	1	iIII3-3-X12/B,
TR2	22590	104.37	1056.45	1056.45	3	1.30965	Q9NQR9-2	G6PC2_HUMAN	Isoform 2 of Glucose-6-phosphatase 2	83	92	ILCLVCHGNR	I1dEC3CamC6CamN9GlcNAc	91	N2H9F0S0	01Y41Y41M(31M21M21M31G)61M(31M21M)61M	Mannose	81.91	1	N,0;	1	iIII3-3-X12/B,
TR2	22590	104.37	1056.45	1056.45	3	6.12675	Q8TD06	AGR3_HUMAN	Anterior gradient protein 3	108	118	NLSPDGQYVPR	N1GlcNAc@dE	108	N2H9F0S0	01Y41Y41M(31M21M21M31G)61M(31M21M)61M	Mannose	81.68	1	N,0;	1	iIII3-3-X12/B,
TR3	22665	104.37	1162.55	1162.54	3	1.8118	Q86XH1	DRC11_HUMAN	Dynein regulatory complex protein 11	721	736	NGGVLTSALNVSCLAK	N1dEN10GlcNAcC13CamK16dE	730	N4H5F1S0	01Y(61F)41Y41M(31M41Y41L)61M61Y41L	Complex	73.49	1	N,0;	0
TR2	22590	104.37	1056.45	1056.45	3	6.12675	Q8TD06	AGR3_HUMAN	Anterior gradient protein 3	108	118	NLSPDGQYVPR	N1GlcNAc@dE	108	N2H9F0S0	01Y41Y41M(31M21M21M)61M(31M21M)61M21M	Mannose	71.49	1	N,0;	1	iI2-3-X45/C,
TR3	22665	104.37	1162.55	1162.54	3	1.8118	Q86XH1	DRC11_HUMAN	Dynein regulatory complex protein 11	721	736	NGGVLTSALNVSCLAK	N1dEN10GlcNAcC13CamK16dE	730	N4H5F1S0	01Y41Y41M(31M41Y(31F)41L)61M61Y41L	Complex	66.89	1	N,0;	0
TR3	22683	104.46	1153.02	1153.01	2	6.00535	P25391	LAMA1_HUMAN	Laminin subunit alpha-1	2046	2051	VNTTLR	V1dEN2GlcNAc	2047	N2H7F0S0	01Y41Y41M(31M)61M(31M21M)61M21M	Mannose	54.48	2	N,0;	2	iI2-3-X45/C,iI2-3-B/Y,C/Z,
TR3	22683	104.46	1153.02	1153.01	2	6.00535	P25391	LAMA1_HUMAN	Laminin subunit alpha-1	2046	2051	VNTTLR	V1dEN2GlcNAc	2047	N2H7F0S0	01Y41Y41M(31M21M)61M(31M21M)61M	Mannose	54.48	2	N,0;	1	iI2-3-B/Y,C/Z,
TR3	22683	104.46	1153.02	1153.01	2	6.00535	P25391	LAMA1_HUMAN	Laminin subunit alpha-1	2046	2051	VNTTLR	V1dEN2GlcNAc	2047	N2H7F0S0	01Y41Y41M(31M21M21M)61M(31M)61M	Mannose	40.94	1	N,0;	1	iI2-3-B/Y,C/Z,iIII2-3-B/Y,C/Z,
TR3	22728	104.69	1043.13	1043.13	3	-0.931909	P56199	ITA1_HUMAN	Integrin alpha-1	459	469	YNHTGQVIIYR	Y1dEN2GlcNAc	460	N2H8F0S0	01Y41Y41M(31M21M21M)61M(31M21M)61M	Mannose	94.5	1	N,1;	1	iI2-3-X35/B,
TR3	22728	104.69	1043.13	1043.13	3	-0.931909	P56199	ITA1_HUMAN	Integrin alpha-1	459	469	YNHTGQVIIYR	Y1dEN2GlcNAc	460	N2H8F0S0	01Y41Y41M(31M21M)61M(31M21M)61M21M	Mannose	92.38	1	N,1;	2	iI2-3-B/Y,C/Z,iI2-4-X01/B,
TR3	22728	104.69	1043.47	1043.46	3	9.15297	Q9Y2W1	TR150_HUMAN	Thyroid hormone receptor-associated protein 3	162	173	SSSNHSRVESSK	S1dEN4GlcNAcK12dE	165	N2H8F0S0	01Y41Y41M(31M21M21M)61M(31M21M)61M	Mannose	69.63	1	N,1;	1	iI2-3-X35/B,
TR3	22728	104.69	1043.47	1043.46	3	9.15297	Q9Y2W1	TR150_HUMAN	Thyroid hormone receptor-associated protein 3	162	173	SSSNHSRVESSK	S1dEN4GlcNAcK12dE	165	N2H8F0S0	01Y41Y41M(31M21M21M31G)61M(31M)61M	Mannose	65.55	1	N,1;	0
TR3	22728	104.69	1043.47	1043.46	3	6.57211	Q8TDR2	STK35_HUMAN	Serine/threonine-protein kinase 35	272	283	NGLAQRMSHGNK	N1dEN11GlcNAcK12dE	282	N2H8F0S0	01Y41Y41M(31M21M21M31G)61M(31M)61M	Mannose	55.15	1	N,0;	0
TR3	22728	104.69	1043.47	1043.46	3	6.57211	Q8TDR2	STK35_HUMAN	Serine/threonine-protein kinase 35	272	283	NGLAQRMSHGNK	N1dEN11GlcNAcK12dE	282	N2H8F0S0	01Y41Y41M(31M21M21M)61M(31M21M)61M	Mannose	53.18	1	N,0;	1	iI2-3-X35/B,
TR3	22782	104.96	1358.11	1358.1	2	7.65863	O95372	LYPA2_HUMAN	Acyl-protein thioesterase 2	154	164	AFPQAANGSAK	A1dEN7GlcNAcK11dE	160	N2H7F0S0	01Y41Y41M(31M21M)61M(31M21M)61M	Mannose	133.32	1	N,2;	1	iI2-3-B/Y,C/Z,
TR3	22782	104.96	1358.11	1358.1	2	7.65863	O95372	LYPA2_HUMAN	Acyl-protein thioesterase 2	154	164	AFPQAANGSAK	A1dEN7GlcNAcK11dE	160	N2H7F0S0	01Y41Y41M(31M)61M(31M21M)61M21M	Mannose	125.68	1	N,2;	1	iI2-3-B/Y,C/Z,
TR3	22783	104.96	1439.13	1439.14	2	-4.299	Q29983	MICA_HUMAN	MHC class I polypeptide-related sequence A	204	213	TVPPMVNVTR	T1dEN7GlcNAc	210	N2H8F0S0	01Y41Y41M(31M21M)61M(31M21M)61M21M	Mannose	108.46	2	N,1;	1	iI2-3-B/Y,C/Z,
TR3	22783	104.96	1439.13	1439.14	2	-4.299	Q29983	MICA_HUMAN	MHC class I polypeptide-related sequence A	204	213	TVPPMVNVTR	T1dEN7GlcNAc	210	N2H8F0S0	01Y41Y41M(31M21M21M)61M(31M21M)61M	Mannose	108.46	2	N,1;	0
TR3	22783	104.96	1439.13	1439.14	2	-4.299	Q29983	MICA_HUMAN	MHC class I polypeptide-related sequence A	204	213	TVPPMVNVTR	T1dEN7GlcNAc	210	N2H8F0S0	01Y41Y41M(31M21M21M31G)61M(31M)61M	Mannose	103.34	1	N,1;	0
TR3	22808	105.08	1130.81	1130.81	3	3.43995	Q9UBV2	SE1L1_HUMAN	Protein sel-1 homolog 1	601	613	EASIVGENETYPR	E1dEN8GlcNAc	608	N2H9F0S0	01Y41Y41M(31M21M21M)61M(31M21M)61M21M	Mannose	64.86	2	N,3;	1	iI2-3-X45/C,
TR3	22808	105.08	1130.81	1130.81	3	3.43995	Q9UBV2	SE1L1_HUMAN	Protein sel-1 homolog 1	601	613	EASIVGENETYPR	E1dEN8GlcNAc	608	N2H9F0S0	01Y41Y41M(31M21M21M31G)61M(31M21M)61M	Mannose	64.86	2	N,3;	0
TR3	22808	105.08	1130.81	1130.81	3	3.43995	Q9UBV2	SE1L1_HUMAN	Protein sel-1 homolog 1	601	613	EASIVGENETYPR	E1dEN8GlcNAc	608	N2H9F0S0	01Y41Y41M(31M21M21M31G31G)61M(31M)61M	Mannose	57.71	1	N,3;	0
TR2	22780	105.3	1259.58	1259.57	3	4.48037	P20645	MPRD_HUMAN	Cation-dependent mannose-6-phosphate receptor	80	95	EAGNHTSGAGLVQINK	E1dEN15GlcNAcK16dE	94	N4H5F1S1	01Y(61F)41Y41M(31M41Y41L)61M61Y41L32S	Complex	87.21	1	N,0;	1	iI3-4-X45/C,
TR2	22780	105.3	1259.58	1259.57	3	4.48037	P20645	MPRD_HUMAN	Cation-dependent mannose-6-phosphate receptor	80	95	EAGNHTSGAGLVQINK	E1dEN4GlcNAcK16dE	83	N4H5F1S1	01Y(61F)41Y41M(31M41Y41L)61M61Y41L32S	Complex	87.21	1	N,2;	1	iI3-4-X45/C,
TR2	22780	105.3	1259.58	1259.57	3	4.48037	P20645	MPRD_HUMAN	Cation-dependent mannose-6-phosphate receptor	80	95	EAGNHTSGAGLVQINK	E1dEN15GlcNAcK16dE	94	N4H5F1S1	01Y(61F)41Y41M(31M)61M(21Y41L32S)61Y41L	Complex	81.59	1	N,0;	0
TR2	22780	105.3	1259.58	1259.57	3	4.48037	P20645	MPRD_HUMAN	Cation-dependent mannose-6-phosphate receptor	80	95	EAGNHTSGAGLVQINK	E1dEN4GlcNAcK16dE	83	N4H5F1S1	01Y(61F)41Y41M(31M)61M(21Y41L32S)61Y41L	Complex	81.59	1	N,2;	0
TR1	22847	105.44	1045.79	1045.79	3	-5.46453	Q8TDW4	ST7L_HUMAN	Suppressor of tumorigenicity 7 protein-like	147	156	QNLSECKVWR	Q1dEN2GlcNAcC6CamK7dE	148	N2H8F0S0	01Y41Y41M(31M21M)61M(31M21M)61M21M	Mannose	84.82	1	N,0;	2	45AI3,iI2-3-B/Y,C/Z,
TR1	22847	105.44	1045.79	1045.79	3	-5.46453	Q8TDW4	ST7L_HUMAN	Suppressor of tumorigenicity 7 protein-like	147	156	QNLSECKVWR	Q1dEN2GlcNAcC6CamK7dE	148	N2H8F0S0	01Y41Y41M(31M21M21M)61M(31M21M)61M	Mannose	82.74	1	N,0;	2	iI2-3-X25/C,iI2-3-X35/B,
TR1	22847	105.44	1045.79	1045.78	3	5.33117	Q9UKI8	TLK1_HUMAN	Serine/threonine-protein kinase tousled-like 1	126	137	KAENQNESSQGK	K1dEN6GlcNAcK12dE	131	N2H8F0S0	01Y41Y41M(31M21M21M)61M(31M21M)61M	Mannose	78.12	1	N,0;	3	iI2-3-X25/C,iI2-3-X35/B,02XI4,02XII4,
TR1	22847	105.44	1045.79	1045.78	3	5.33117	Q9UKI8	TLK1_HUMAN	Serine/threonine-protein kinase tousled-like 1	126	137	KAENQNESSQGK	K1dEN6GlcNAcK12dE	131	N2H8F0S0	01Y41Y41M(31M21M21M31G)61M(31M)61M	Mannose	74.07	1	N,0;	2	iIII3-3-X12/B,iI2-3-X25/C,
TR3	22926	105.66	1310.94	1310.93	3	7.82012	O75976	CBPD_HUMAN	Carboxypeptidase D	1060	1077	GKDLDTDFTNNASQPETK	G1dEK2dEN11GlcNAcK18dE	1070	N4H5F1S0	01Y(61F)41Y41M(31M41Y41L)61M61Y41L	Complex	146.74	1	N,1;	0
TR3	22926	105.66	1310.94	1310.93	3	7.82012	O75976	CBPD_HUMAN	Carboxypeptidase D	1060	1077	GKDLDTDFTNNASQPETK	G1dEK2dEN11GlcNAcK18dE	1070	N4H5F1S0	01Y41Y41M(31M41Y(31F)41L)61M61Y41L	Complex	134.8	1	N,1;	0
TR3	22981	105.94	987.097	987.1	3	-3.36968	P98073	ENTK_HUMAN	Enteropeptidase	847	857	SNLTSPQTVPR	S1dEN2GlcNAc	848	N2H8F0S0	01Y41Y41M(31M21M)61M(31M21M)61M21M	Mannose	54.39	1	N,1;	2	iI2-3-B/Y,C/Z,iI3-4-X45/C,
TR3	22981	105.94	987.097	987.1	3	-3.36968	P98073	ENTK_HUMAN	Enteropeptidase	847	857	SNLTSPQTVPR	S1dEN2GlcNAc	848	N2H8F0S0	01Y41Y41M(31M21M21M)61M(31M21M)61M	Mannose	52.4	1	N,1;	0
TR3	22981	105.94	987.43	987.43	3	0.543544	Q8NDH2	CC168_HUMAN	Coiled-coil domain-containing protein 168	1549	1558	SPNTSEMSKR	S1dEN3GlcNAcK9dE	1551	N2H8F0S0	01Y41Y41M(31M21M)61M(31M21M)61M21M	Mannose	44.73	1	N,1;	2	iI2-3-B/Y,C/Z,iI3-4-X45/C,
TR3	22981	105.94	987.43	987.43	3	0.543544	Q8NDH2	CC168_HUMAN	Coiled-coil domain-containing protein 168	1549	1558	SPNTSEMSKR	S1dEN3GlcNAcK9dE	1551	N2H8F0S0	01Y41Y41M(31M21M21M)61M(31M21M)61M	Mannose	42.82	1	N,1;	0
TR3	23030	106.18	1259.91	1259.91	3	-6.21907	P20645	MPRD_HUMAN	Cation-dependent mannose-6-phosphate receptor	80	95	EAGNHTSGAGLVQINK	E1dEN15GlcNAcK16dE	94	N4H5F3S0	01Y(61F)41Y41M(31M41Y41L)61M21Y(31F)41L21F	Complex	73.66	1	N,0;	0
TR3	23030	106.18	1259.91	1259.91	3	-6.21907	P20645	MPRD_HUMAN	Cation-dependent mannose-6-phosphate receptor	80	95	EAGNHTSGAGLVQINK	E1dEN4GlcNAcK16dE	83	N4H5F3S0	01Y(61F)41Y41M(31M41Y41L)61M21Y(31F)41L21F	Complex	73.66	1	N,2;	0
TR3	23030	106.18	1259.91	1259.91	3	-6.21907	P20645	MPRD_HUMAN	Cation-dependent mannose-6-phosphate receptor	80	95	EAGNHTSGAGLVQINK	E1dEN15GlcNAcK16dE	94	N4H5F3S0	01Y(61F)41Y41M(31M)61M(21Y(31F)41L21F)61Y41L	Complex	70.18	1	N,0;	0
TR3	23030	106.18	1259.91	1259.91	3	-6.21907	P20645	MPRD_HUMAN	Cation-dependent mannose-6-phosphate receptor	80	95	EAGNHTSGAGLVQINK	E1dEN4GlcNAcK16dE	83	N4H5F3S0	01Y(61F)41Y41M(31M)61M(21Y(31F)41L21F)61Y41L	Complex	70.18	1	N,2;	0
TR1	23005	106.2	977.415	977.417	3	-2.01666	Q6NUJ2	CK087_HUMAN	Uncharacterized protein C11orf87	21	36	TFASPNASGSGNTGAR	T1dEN6GlcNAc	26	N2H6F0S0	01Y41Y41M(31M)61M(31M21M)61M	Mannose	69.86	2	N,2;	5	iI2-3-X15/C,iI2-3-X35/B,iI2-3-X45/C,iI2-3-X35/C,iI2-3-B/Y,C/Z,
TR1	23005	106.2	977.415	977.417	3	-2.01666	Q6NUJ2	CK087_HUMAN	Uncharacterized protein C11orf87	21	36	TFASPNASGSGNTGAR	T1dEN6GlcNAc	26	N2H6F0S0	01Y41Y41M(31M21M)61M(31M)61M	Mannose	69.86	2	N,2;	2	iI2-3-A34/Y,iI2-3-B/Y,C/Z,
TR3	23044	106.25	1259.58	1259.57	3	4.86802	P20645	MPRD_HUMAN	Cation-dependent mannose-6-phosphate receptor	80	95	EAGNHTSGAGLVQINK	E1dEN15GlcNAcK16dE	94	N4H5F1S1	01Y41Y41M(31M41Y(31F)41L)61M61Y41L32S	Complex	82.6	1	N,0;	0
TR3	23044	106.25	1259.58	1259.57	3	4.86802	P20645	MPRD_HUMAN	Cation-dependent mannose-6-phosphate receptor	80	95	EAGNHTSGAGLVQINK	E1dEN4GlcNAcK16dE	83	N4H5F1S1	01Y41Y41M(31M41Y(31F)41L)61M61Y41L32S	Complex	82.6	1	N,1;	0
TR3	23193	107	996.779	996.773	3	5.26043	Q14126	DSG2_HUMAN	Desmoglein-2	459	468	YVQNGTYTVK	Y1dEN4GlcNAcK10dE	462	N2H8F0S0	01Y41Y41M(31M21M)61M(31M21M)61M21M	Mannose	85.47	1	N,1;	2	iI3-4-X25/C,iI2-3-B/Y,C/Z,
TR3	23193	107	996.779	996.773	3	5.26043	Q14126	DSG2_HUMAN	Desmoglein-2	459	468	YVQNGTYTVK	Y1dEN4GlcNAcK10dE	462	N2H8F0S0	01Y41Y41M(31M21M21M)61M(31M21M)61M	Mannose	81.35	1	N,1;	2	iI2-3-X15/C,iI2-3-X35/B,
TR3	23193	107	996.779	996.772	3	6.61782	Q07157	ZO1_HUMAN	Tight junction protein ZO-1	1508	1518	APVNGTEQTQK	A1dEN4GlcNAcK11dE	1511	N2H8F0S0	01Y41Y41M(31M21M)61M(31M21M)61M21M	Mannose	80.72	1	N,1;	2	iI3-4-X25/C,iI2-3-B/Y,C/Z,
TR3	23193	107	996.779	996.781	3	-2.23073	Q6WRI0	IGS10_HUMAN	Immunoglobulin superfamily member 10	1155	1164	THKVNASYPR	T1dEK3dEN5GlcNAc	1159	N2H8F0S0	01Y41Y41M(31M21M)61M(31M21M)61M21M	Mannose	79.08	1	N,1;	2	iI3-4-X25/C,iI2-3-B/Y,C/Z,
TR3	23193	107	996.779	996.772	3	6.61782	Q07157	ZO1_HUMAN	Tight junction protein ZO-1	1508	1518	APVNGTEQTQK	A1dEN4GlcNAcK11dE	1511	N2H8F0S0	01Y41Y41M(31M21M21M)61M(31M21M)61M	Mannose	78.65	1	N,1;	2	iI2-3-X15/C,iI2-3-X35/B,
TR3	23193	107	996.779	996.781	3	-2.23073	Q6WRI0	IGS10_HUMAN	Immunoglobulin superfamily member 10	1155	1164	THKVNASYPR	T1dEK3dEN5GlcNAc	1159	N2H8F0S0	01Y41Y41M(31M21M21M)61M(31M21M)61M	Mannose	77.03	1	N,1;	2	iI2-3-X15/C,iI2-3-X35/B,
TR3	23193	107	996.779	996.773	3	5.29554	O60502	OGA_HUMAN	Protein O-GlcNAcase	587	597	ANSSVVSVNCK	A1dEN2GlcNAcC10CamK11dE	588	N2H8F0S0	01Y41Y41M(31M21M)61M(31M21M)61M21M	Mannose	74.68	1	N,2;	2	iI3-4-X25/C,iI2-3-B/Y,C/Z,
TR3	23193	107	996.779	996.773	3	5.29554	O60502	OGA_HUMAN	Protein O-GlcNAcase	587	597	ANSSVVSVNCK	A1dEN2GlcNAcC10CamK11dE	588	N2H8F0S0	01Y41Y41M(31M21M21M)61M(31M21M)61M	Mannose	72.61	1	N,2;	2	iI2-3-X15/C,iI2-3-X35/B,
TR2	23196	107.29	1286.91	1286.91	3	-1.44533	P13473	LAMP2_HUMAN	Lysosome-associated membrane glycoprotein 2	248	266	VASVININPNTTHSTGSCR	V1dEN10GlcNAcC18Cam	257	N4H5F1S0	01Y(61F)41Y41M(31M41Y41L)61M61Y41L	Complex	208.31	1	N,3;	0
TR2	23196	107.29	1286.91	1286.91	3	-1.44533	P13473	LAMP2_HUMAN	Lysosome-associated membrane glycoprotein 2	248	266	VASVININPNTTHSTGSCR	V1dEN10GlcNAcC18Cam	257	N4H5F1S0	01Y41Y41M(31M41Y41L)61M61Y41L21F	Complex	199.23	1	N,3;	0
TR2	23196	107.29	1286.58	1286.59	3	-2.85404	A6NNF4	ZN726_HUMAN	Zinc finger protein 726	653	668	CEECGKSFNLSSTFIK	C1dE@CamC4CamK6dEN9GlcNAcK16dE	661	N4H5F1S0	01Y(61F)41Y41M(31M41Y41L)61M61Y41L	Complex	153.9	1	N,0;	0
TR2	23196	107.29	1286.58	1286.59	3	-2.85404	A6NNF4	ZN726_HUMAN	Zinc finger protein 726	653	668	CEECGKSFNLSSTFIK	C1dE@CamC4CamK6dEN9GlcNAcK16dE	661	N4H5F1S0	01Y41Y41M(31M41Y41L)61M61Y41L21F	Complex	127.58	1	N,0;	0
TR1	23338	107.75	1163.99	1163.99	4	1.78916	P15328	FOLR1_HUMAN	Folate receptor alpha	63	83	NACCSTNTSQEAHKDVSYLYR	N1dEC3CamC4CamN7GlcNAcK14dE	69	N2H10F0S0	01Y41Y41M(31M21M21M31G)61M(31M21M)61M21M	Mannose	320.8	1	N,0;	1	45AI3,
TR1	23338	107.75	1163.99	1163.99	4	1.78916	P15328	FOLR1_HUMAN	Folate receptor alpha	63	83	NACCSTNTSQEAHKDVSYLYR	N1dEC3CamC4CamN7GlcNAcK14dE	69	N2H10F0S0	01Y41Y41M(31M21M21M31G31G)61M(31M21M)61M	Mannose	318.34	1	N,0;	0
TR1	23338	107.75	1163.99	1163.99	4	1.78916	P15328	FOLR1_HUMAN	Folate receptor alpha	63	83	NACCSTNTSQEAHKDVSYLYR	N1GlcNAc@dEC3CamC4CamK14dE	63	N2H10F0S0	01Y41Y41M(31M21M21M31G)61M(31M21M)61M21M	Mannose	313.38	1	N,0;	1	45AI3,
TR1	23338	107.75	1163.99	1163.99	4	1.78916	P15328	FOLR1_HUMAN	Folate receptor alpha	63	83	NACCSTNTSQEAHKDVSYLYR	N1GlcNAc@dEC3CamC4CamK14dE	63	N2H10F0S0	01Y41Y41M(31M21M21M31G31G)61M(31M21M)61M	Mannose	310.92	1	N,0;	0
TR1	23366	107.88	971.762	971.757	3	5.54864	Q5MJ70	SPDYA_HUMAN	Speedy protein A	20	29	SGSNRSHQPK	S1dEN4GlcNAcK10dE	23	N2H8F0S0	01Y41Y41M(31M21M)61M(31M21M)61M21M	Mannose	96.58	1	N,1;	1	iI2-3-B/Y,C/Z,
TR1	23366	107.88	971.762	971.761	3	0.750108	P35573	GDE_HUMAN	Glycogen debranching enzyme	808	816	EHIQLNESK	E1dEN6GlcNAcK9dE	813	N2H8F0S0	01Y41Y41M(31M21M)61M(31M21M)61M21M	Mannose	94.02	1	N,1;	1	iI2-3-B/Y,C/Z,
TR1	23366	107.88	971.762	971.757	3	5.54864	Q5MJ70	SPDYA_HUMAN	Speedy protein A	20	29	SGSNRSHQPK	S1dEN4GlcNAcK10dE	23	N2H8F0S0	01Y41Y41M(31M21M21M)61M(31M21M)61M	Mannose	90.33	1	N,1;	1	iI2-3-X35/B,
TR1	23366	107.88	971.762	971.761	3	0.750108	P35573	GDE_HUMAN	Glycogen debranching enzyme	808	816	EHIQLNESK	E1dEN6GlcNAcK9dE	813	N2H8F0S0	01Y41Y41M(31M21M21M)61M(31M21M)61M	Mannose	87.77	1	N,1;	1	iI2-3-X35/B,
TR1	23366	107.88	972.096	972.091	3	5.78912	Q9Y5F0	PCDBD_HUMAN	Protocadherin beta-13	462	471	ENNSPALHIR	E1dEN2GlcNAc	463	N2H8F0S0	01Y41Y41M(31M21M)61M(31M21M)61M21M	Mannose	79.55	1	N,0;	1	iI2-3-B/Y,C/Z,
TR1	23366	107.88	972.096	972.1	3	-3.95891	Q9P2E9	RRBP1_HUMAN	Ribosome-binding protein 1	201	210	KAEGTQNQSK	K1dEN7GlcNAcK10dE	207	N2H8F0S0	01Y41Y41M(31M21M)61M(31M21M)61M21M	Mannose	78.07	2	N,0;	1	iI2-3-B/Y,C/Z,
TR1	23366	107.88	972.096	972.1	3	-3.95891	Q9P2E9	RRBP1_HUMAN	Ribosome-binding protein 1	201	210	KAEGTQNQSK	K1dEN7GlcNAcK10dE	207	N2H8F0S0	01Y41Y41M(31M21M21M)61M(31M21M)61M	Mannose	78.07	2	N,0;	1	iI2-3-X35/B,
TR1	23366	107.88	972.096	972.091	3	5.78912	Q9Y5F0	PCDBD_HUMAN	Protocadherin beta-13	462	471	ENNSPALHIR	E1dEN2GlcNAc	463	N2H8F0S0	01Y41Y41M(31M21M21M)61M(31M21M)61M	Mannose	77.54	1	N,0;	1	iI2-3-X35/B,
TR1	23366	107.88	972.096	972.092	3	4.68016	Q9P1A6	DLGP2_HUMAN	Disks large-associated protein 2	251	261	SNANGTKADGR	S1dEN4GlcNAcK7dE	254	N2H8F0S0	01Y41Y41M(31M21M)61M(31M21M)61M21M	Mannose	76.5	1	N,0;	1	iI2-3-B/Y,C/Z,
TR1	23366	107.88	972.096	972.092	3	4.68016	Q9P1A6	DLGP2_HUMAN	Disks large-associated protein 2	251	261	SNANGTKADGR	S1dEN4GlcNAcK7dE	254	N2H8F0S0	01Y41Y41M(31M21M21M)61M(31M21M)61M	Mannose	74.49	1	N,0;	1	iI2-3-X35/B,
TR1	23366	107.88	972.096	972.1	3	-3.95891	Q9P2E9	RRBP1_HUMAN	Ribosome-binding protein 1	201	210	KAEGTQNQSK	K1dEN7GlcNAcK10dE	207	N2H8F0S0	01Y41Y41M(31M21M21M31G)61M(31M)61M	Mannose	74.06	1	N,0;	0
TR1	23366	107.88	972.096	972.098	3	-1.73897	Q32M45	ANO4_HUMAN	Anoctamin-4	105	113	NKSNGLYFR	N1GlcNAc@dEK2dE	105	N2H8F0S0	01Y41Y41M(31M21M)61M(31M21M)61M21M	Mannose	73.45	2	N,0;	1	iI2-3-B/Y,C/Z,
TR1	23366	107.88	972.096	972.098	3	-1.73897	Q32M45	ANO4_HUMAN	Anoctamin-4	105	113	NKSNGLYFR	N1GlcNAc@dEK2dE	105	N2H8F0S0	01Y41Y41M(31M21M21M)61M(31M21M)61M	Mannose	73.45	2	N,0;	1	iI2-3-X35/B,
TR1	23366	107.88	972.096	972.101	3	-4.24077	Q13510	ASAH1_HUMAN	Acid ceramidase	335	343	TPAKMCLNR	T1dEK4dEC6CamN8GlcNAc	342	N2H8F0S0	01Y41Y41M(31M21M)61M(31M21M)61M21M	Mannose	70.33	2	N,0;	1	iI2-3-B/Y,C/Z,
TR1	23366	107.88	972.096	972.101	3	-4.24077	Q13510	ASAH1_HUMAN	Acid ceramidase	335	343	TPAKMCLNR	T1dEK4dEC6CamN8GlcNAc	342	N2H8F0S0	01Y41Y41M(31M21M21M)61M(31M21M)61M	Mannose	70.33	2	N,0;	1	iI2-3-X35/B,
TR1	23366	107.88	972.096	972.093	3	3.05788	Q8IYK2	CC105_HUMAN	Coiled-coil domain-containing protein 105	261	269	RHSWVNLSR	R1dEN6GlcNAc	266	N2H8F0S0	01Y41Y41M(31M21M)61M(31M21M)61M21M	Mannose	69.89	1	N,1;	1	iI2-3-B/Y,C/Z,
TR1	23366	107.88	972.096	972.089	3	7.33425	Q5CZC0	FSIP2_HUMAN	Fibrous sheath-interacting protein 2	1181	1190	ASNYISNTTK	A1dEN7GlcNAcK10dE	1187	N2H8F0S0	01Y41Y41M(31M21M)61M(31M21M)61M21M	Mannose	69.59	1	N,1;	1	iI2-3-B/Y,C/Z,
TR1	23366	107.88	972.096	972.098	3	-1.73897	Q32M45	ANO4_HUMAN	Anoctamin-4	105	113	NKSNGLYFR	N1GlcNAc@dEK2dE	105	N2H8F0S0	01Y41Y41M(31M21M21M31G)61M(31M)61M	Mannose	69.52	1	N,0;	0
TR1	23366	107.88	972.096	972.093	3	3.05788	Q8IYK2	CC105_HUMAN	Coiled-coil domain-containing protein 105	261	269	RHSWVNLSR	R1dEN6GlcNAc	266	N2H8F0S0	01Y41Y41M(31M21M21M)61M(31M21M)61M	Mannose	67.93	1	N,1;	1	iI2-3-X35/B,
TR1	23366	107.88	972.096	972.089	3	7.33425	Q5CZC0	FSIP2_HUMAN	Fibrous sheath-interacting protein 2	1181	1190	ASNYISNTTK	A1dEN7GlcNAcK10dE	1187	N2H8F0S0	01Y41Y41M(31M21M21M)61M(31M21M)61M	Mannose	67.63	1	N,1;	1	iI2-3-X35/B,
TR1	23366	107.88	972.096	972.101	3	-4.24077	Q13510	ASAH1_HUMAN	Acid ceramidase	335	343	TPAKMCLNR	T1dEK4dEC6CamN8GlcNAc	342	N2H8F0S0	01Y41Y41M(31M21M21M31G)61M(31M)61M	Mannose	66.4	1	N,0;	0
TR1	23366	107.88	972.431	972.432	3	-0.836687	P35749	MYH11_HUMAN	Myosin-11	1778	1787	STAQKNESAR	S1dEK5dEN6GlcNAc	1783	N2H8F0S0	01Y41Y41M(31M21M)61M(31M21M)61M21M	Mannose	63.28	2	N,0;	1	iI2-3-B/Y,C/Z,
TR1	23366	107.88	972.431	972.432	3	-0.836687	P35749	MYH11_HUMAN	Myosin-11	1778	1787	STAQKNESAR	S1dEK5dEN6GlcNAc	1783	N2H8F0S0	01Y41Y41M(31M21M21M)61M(31M21M)61M	Mannose	63.28	2	N,0;	1	iI2-3-X35/B,
TR1	23366	107.88	972.431	972.432	3	-0.836687	P35749	MYH11_HUMAN	Myosin-11	1778	1787	STAQKNESAR	S1dEK5dEN6GlcNAc	1783	N2H8F0S0	01Y41Y41M(31M21M21M31G)61M(31M)61M	Mannose	59.46	1	N,0;	0
TR1	23423	108.14	1008.46	1008.46	3	-1.27946	Q15165	PON2_HUMAN	Serum paraoxonase/arylesterase 2	250	259	HTNMNLTQLK	H1dEN5GlcNAcK10dE	254	N2H8F0S0	01Y41Y41M(31M21M)61M(31M21M)61M21M	Mannose	132.36	1	N,1;	1	iI2-3-B/Y,C/Z,
TR1	23423	108.14	1008.46	1008.46	3	-1.27946	Q15165	PON2_HUMAN	Serum paraoxonase/arylesterase 2	250	259	HTNMNLTQLK	H1dEN5GlcNAcK10dE	254	N2H8F0S0	01Y41Y41M(31M21M21M)61M(31M21M)61M	Mannose	130.28	1	N,1;	4	iI2-3-X15/C,iI2-3-X25/C,iI2-3-X35/B,iI3-3-X45/C,
TR1	23423	108.14	1008.46	1008.45	3	3.7292	Q6V0I7	FAT4_HUMAN	Protocadherin Fat 4	2920	2930	INATTGEIFNK	I1dEN2GlcNAcK11dE	2921	N2H8F0S0	01Y41Y41M(31M21M)61M(31M21M)61M21M	Mannose	93.87	1	N,0;	1	iI2-3-B/Y,C/Z,
TR1	23423	108.14	1008.46	1008.45	3	3.7292	Q6V0I7	FAT4_HUMAN	Protocadherin Fat 4	2920	2930	INATTGEIFNK	I1dEN2GlcNAcK11dE	2921	N2H8F0S0	01Y41Y41M(31M21M21M)61M(31M21M)61M	Mannose	91.79	1	N,0;	4	iI2-3-X15/C,iI2-3-X25/C,iI2-3-X35/B,iI3-3-X45/C,
TR1	23423	108.14	1008.46	1008.47	3	-9.57026	Q8IYA2	C144C_HUMAN	Putative coiled-coil domain-containing protein 144C	1073	1082	TSQADFNKTK	T1dEN7GlcNAcK8dEK10dE	1079	N2H8F0S0	01Y41Y41M(31M21M)61M(31M21M)61M21M	Mannose	87.7	1	N,0;	1	iI2-3-B/Y,C/Z,
TR1	23423	108.14	1008.46	1008.46	3	-3.45604	Q5JSH3	WDR44_HUMAN	WD repeat-containing protein 44	46	56	VGNESPVQELK	V1dEN3GlcNAcK11dE	48	N2H8F0S0	01Y41Y41M(31M21M)61M(31M21M)61M21M	Mannose	85.26	1	N,1;	1	iI2-3-B/Y,C/Z,
TR1	23423	108.14	1008.46	1008.45	3	3.30776	A2A2Y4	FRMD3_HUMAN	FERM domain-containing protein 3	83	91	QRHWLEPNK	Q1dEN8GlcNAcK9dE	90	N2H8F0S0	01Y41Y41M(31M21M)61M(31M21M)61M21M	Mannose	83.69	1	N,1;	1	iI2-3-B/Y,C/Z,
TR1	23423	108.14	1008.46	1008.47	3	-9.57026	Q8IYA2	C144C_HUMAN	Putative coiled-coil domain-containing protein 144C	1073	1082	TSQADFNKTK	T1dEN7GlcNAcK8dEK10dE	1079	N2H8F0S0	01Y41Y41M(31M21M21M)61M(31M21M)61M	Mannose	83.59	1	N,0;	4	iI2-3-X15/C,iI2-3-X25/C,iI2-3-X35/B,iI3-3-X45/C,
TR1	23423	108.14	1008.46	1008.46	3	-3.45604	Q5JSH3	WDR44_HUMAN	WD repeat-containing protein 44	46	56	VGNESPVQELK	V1dEN3GlcNAcK11dE	48	N2H8F0S0	01Y41Y41M(31M21M21M)61M(31M21M)61M	Mannose	83.2	1	N,1;	4	iI2-3-X15/C,iI2-3-X25/C,iI2-3-X35/B,iI3-3-X45/C,
TR1	23423	108.14	1008.46	1008.45	3	3.30776	A2A2Y4	FRMD3_HUMAN	FERM domain-containing protein 3	83	91	QRHWLEPNK	Q1dEN8GlcNAcK9dE	90	N2H8F0S0	01Y41Y41M(31M21M21M)61M(31M21M)61M	Mannose	81.61	1	N,1;	4	iI2-3-X15/C,iI2-3-X25/C,iI2-3-X35/B,iI3-3-X45/C,
TR1	23423	108.14	1008.46	1008.46	3	-3.45604	Q9ULJ8	NEB1_HUMAN	Neurabin-1	274	285	SNATPVPEVASK	S1dEN2GlcNAcK12dE	275	N2H8F0S0	01Y41Y41M(31M21M)61M(31M21M)61M21M	Mannose	79.23	1	N,2;	1	iI2-3-B/Y,C/Z,
TR1	23423	108.14	1008.46	1008.46	3	-3.45604	Q9ULJ8	NEB1_HUMAN	Neurabin-1	274	285	SNATPVPEVASK	S1dEN2GlcNAcK12dE	275	N2H8F0S0	01Y41Y41M(31M21M21M)61M(31M21M)61M	Mannose	77.17	1	N,2;	4	iI2-3-X15/C,iI2-3-X25/C,iI2-3-X35/B,iI3-3-X45/C,
TR1	23423	108.14	1008.46	1008.45	3	7.28319	Q9Y4F9	RIPR2_HUMAN	Rho family-interacting cell polarization regulator 2	171	181	AARESLTEINR	A1dEN10GlcNAc	180	N2H8F0S0	01Y41Y41M(31M21M)61M(31M21M)61M21M	Mannose	65.01	1	N,1;	1	iI2-3-B/Y,C/Z,
TR1	23423	108.14	1008.46	1008.45	3	7.28319	Q9Y4F9	RIPR2_HUMAN	Rho family-interacting cell polarization regulator 2	171	181	AARESLTEINR	A1dEN10GlcNAc	180	N2H8F0S0	01Y41Y41M(31M21M21M)61M(31M21M)61M	Mannose	63.04	1	N,1;	4	iI2-3-X15/C,iI2-3-X25/C,iI2-3-X35/B,iI3-3-X45/C,
TR1	23450	108.26	1008.79	1008.8	3	-3.67506	Q9H9K5	MER34_HUMAN	Endogenous retroviral envelope protein HEMO	131	142	NGSGPFLGNIPK	N1GlcNAc@dEK12dE	131	N2H8F0S0	01Y41Y41M(31M21M)61M(31M21M)61M21M	Mannose	88.31	1	N,0;	2	iI3-4-X25/C,iI2-3-B/Y,C/Z,
TR1	23450	108.26	1008.79	1008.8	3	-3.67506	Q9H9K5	MER34_HUMAN	Endogenous retroviral envelope protein HEMO	131	142	NGSGPFLGNIPK	N1GlcNAc@dEK12dE	131	N2H8F0S0	01Y41Y41M(31M21M21M)61M(31M21M)61M	Mannose	82.19	1	N,0;	2	iI2-3-X15/C,iI3-3-X45/C,
TR1	23450	108.26	1008.79	1008.79	3	0.948272	Q96HQ0	ZN419_HUMAN	Zinc finger protein 419	298	307	HNSTLVQHHK	H1dEN2GlcNAcK10dE	299	N2H8F0S0	01Y41Y41M(31M21M)61M(31M21M)61M21M	Mannose	78.01	1	N,1;	2	iI3-4-X25/C,iI2-3-B/Y,C/Z,
TR1	23450	108.26	1008.79	1008.78	3	9.6558	Q9BZ29	DOCK9_HUMAN	Dedicator of cytokinesis protein 9	62	71	KTQILNDCLR	K1dEN6GlcNAcC8Cam	67	N2H8F0S0	01Y41Y41M(31M21M)61M(31M21M)61M21M	Mannose	76.19	1	N,1;	2	iI3-4-X25/C,iI2-3-B/Y,C/Z,
TR1	23450	108.26	1008.79	1008.78	3	8.34927	P24386	RAE1_HUMAN	Rab proteins geranylgeranyltransferase component A 1	249	258	SNVSRYAEFK	S1dEN2GlcNAcK10dE	250	N2H8F0S0	01Y41Y41M(31M21M)61M(31M21M)61M21M	Mannose	76.19	1	N,0;	2	iI3-4-X25/C,iI2-3-B/Y,C/Z,
TR1	23450	108.26	1008.79	1008.78	3	9.6558	Q9BZ29	DOCK9_HUMAN	Dedicator of cytokinesis protein 9	62	71	KTQILNDCLR	K1dEN6GlcNAcC8Cam	67	N2H8F0S0	01Y41Y41M(31M21M21M)61M(31M21M)61M	Mannose	72.17	1	N,1;	2	iI2-3-X15/C,iI3-3-X45/C,
TR1	23450	108.26	1008.79	1008.78	3	8.34927	P24386	RAE1_HUMAN	Rab proteins geranylgeranyltransferase component A 1	249	258	SNVSRYAEFK	S1dEN2GlcNAcK10dE	250	N2H8F0S0	01Y41Y41M(31M21M21M)61M(31M21M)61M	Mannose	72.17	1	N,0;	2	iI2-3-X15/C,iI3-3-X45/C,
TR1	23450	108.26	1008.79	1008.79	3	0.948272	Q96HQ0	ZN419_HUMAN	Zinc finger protein 419	298	307	HNSTLVQHHK	H1dEN2GlcNAcK10dE	299	N2H8F0S0	01Y41Y41M(31M21M21M)61M(31M21M)61M	Mannose	71.89	1	N,1;	2	iI2-3-X15/C,iI3-3-X45/C,
TR1	23450	108.26	1008.79	1008.78	3	11.684	P28698	MZF1_HUMAN	Myeloid zinc finger 1	664	673	QHANLTQHRR	Q1dEN4GlcNAc	667	N2H8F0S0	01Y41Y41M(31M21M)61M(31M21M)61M21M	Mannose	59.88	1	N,1;	2	iI3-4-X25/C,iI2-3-B/Y,C/Z,
TR1	23450	108.26	1008.79	1008.78	3	11.684	P28698	MZF1_HUMAN	Myeloid zinc finger 1	664	673	QHANLTQHRR	Q1dEN4GlcNAc	667	N2H8F0S0	01Y41Y41M(31M21M21M)61M(31M21M)61M	Mannose	55.98	1	N,1;	2	iI2-3-X15/C,iI3-3-X45/C,
TR2	23442	108.44	1099.48	1099.48	4	1.05158	P15328	FOLR1_HUMAN	Folate receptor alpha	63	83	NACCSTNTSQEAHKDVSYLYR	N1dEC3CamC4CamN7GlcNAcK14dE	69	N4H5F1S0	01Y(61F)41Y41M(31M41Y41L)61M61Y41L	Complex	151.99	1	N,0;	0
TR2	23442	108.44	1099.48	1099.48	4	1.05158	P15328	FOLR1_HUMAN	Folate receptor alpha	63	83	NACCSTNTSQEAHKDVSYLYR	N1GlcNAc@dEC3CamC4CamK14dE	63	N4H5F1S0	01Y(61F)41Y41M(31M41Y41L)61M61Y41L	Complex	142.78	1	N,0;	0
TR2	23442	108.44	1099.48	1099.48	4	1.05158	P15328	FOLR1_HUMAN	Folate receptor alpha	63	83	NACCSTNTSQEAHKDVSYLYR	N1dEC3CamC4CamN7GlcNAcK14dE	69	N4H5F1S0	01Y41Y41M(31M41Y(31F)41L)61M61Y41L	Complex	142.75	1	N,0;	0
TR2	23442	108.44	1099.48	1099.48	4	1.05158	P15328	FOLR1_HUMAN	Folate receptor alpha	63	83	NACCSTNTSQEAHKDVSYLYR	N1GlcNAc@dEC3CamC4CamK14dE	63	N4H5F1S0	01Y41Y41M(31M41Y(31F)41L)61M61Y41L	Complex	133.54	1	N,0;	0
TR1	23518	108.58	954.774	954.779	3	-5.25283	Q9H9K5	MER34_HUMAN	Endogenous retroviral envelope protein HEMO	131	142	NGSGPFLGNIPK	N1GlcNAc@dEK12dE	131	N2H7F0S0	01Y41Y41M(31M21M)61M(31M21M)61M	Mannose	49.39	1	N,0;	1	iI2-3-B/Y,C/Z,
TR1	23518	108.58	954.774	954.774	3	-0.366882	Q96HQ0	ZN419_HUMAN	Zinc finger protein 419	298	307	HNSTLVQHHK	H1dEN2GlcNAcK10dE	299	N2H7F0S0	01Y41Y41M(31M21M)61M(31M21M)61M	Mannose	47.81	1	N,1;	1	iI2-3-B/Y,C/Z,
TR1	23518	108.58	954.774	954.779	3	-5.25283	Q9H9K5	MER34_HUMAN	Endogenous retroviral envelope protein HEMO	131	142	NGSGPFLGNIPK	N1GlcNAc@dEK12dE	131	N2H7F0S0	01Y41Y41M(31M)61M(31M21M)61M21M	Mannose	45.62	1	N,0;	4	iI2-3-X15/C,iI2-3-X35/B,iI2-3-X45/C,iI2-3-B/Y,C/Z,
TR1	23518	108.58	954.774	954.774	3	-0.366882	Q96HQ0	ZN419_HUMAN	Zinc finger protein 419	298	307	HNSTLVQHHK	H1dEN2GlcNAcK10dE	299	N2H7F0S0	01Y41Y41M(31M)61M(31M21M)61M21M	Mannose	44.04	1	N,1;	4	iI2-3-X15/C,iI2-3-X35/B,iI2-3-X45/C,iI2-3-B/Y,C/Z,
TR1	23538	108.67	986.427	986.424	3	3.31202	P42892	ECE1_HUMAN	Endothelin-converting enzyme 1	184	195	ACMNETRIEELR	A1dEC2CamN4GlcNAc	187	N2H6F0S0	01Y41Y41M(31M21M)61M(31M)61M	Mannose	178.39	1	N,0;	2	iI2-3-X45/B,iI2-3-A34/Y,
TR1	23538	108.67	986.427	986.424	3	3.31202	P42892	ECE1_HUMAN	Endothelin-converting enzyme 1	184	195	ACMNETRIEELR	A1dEC2CamN4GlcNAc	187	N2H6F0S0	01Y41Y41M(31M)61M(31M21M)61M	Mannose	173.43	1	N,0;	4	iI2-3-X15/C,iI2-3-X35/B,iI2-3-X45/C,iI2-3-B/Y,C/Z,
TR3	23753	109.62	972.096	972.102	3	-5.35279	P51530	DNA2_HUMAN	DNA replication ATP-dependent helicase/nuclease DNA2	169	178	AINNSFAPEK	A1dEN3GlcNAcK10dE	171	N2H8F0S0	01Y41Y41M(31M21M)61M(31M21M)61M21M	Mannose	83.18	2	N,0;	1	iI2-3-B/Y,C/Z,
TR3	23753	109.62	972.096	972.102	3	-5.35279	P51530	DNA2_HUMAN	DNA replication ATP-dependent helicase/nuclease DNA2	169	178	AINNSFAPEK	A1dEN3GlcNAcK10dE	171	N2H8F0S0	01Y41Y41M(31M21M21M)61M(31M21M)61M	Mannose	83.18	2	N,0;	1	iI2-3-X35/B,
TR3	23753	109.62	972.096	972.102	3	-5.35279	P51530	DNA2_HUMAN	DNA replication ATP-dependent helicase/nuclease DNA2	169	178	AINNSFAPEK	A1dEN3GlcNAcK10dE	171	N2H8F0S0	01Y41Y41M(31M21M21M31G)61M(31M)61M	Mannose	79.15	1	N,0;	2	iIII3-3-X12/B,iI2-3-X25/C,
TR3	23753	109.62	972.096	972.093	3	3.49406	O60673	REV3L_HUMAN	DNA polymerase zeta catalytic subunit	1560	1569	NISGSLEHNK	N1GlcNAc@dEK10dE	1560	N2H8F0S0	01Y41Y41M(31M21M)61M(31M21M)61M21M	Mannose	68.04	2	N,0;	1	iI2-3-B/Y,C/Z,
TR3	23753	109.62	972.096	972.093	3	3.49406	O60673	REV3L_HUMAN	DNA polymerase zeta catalytic subunit	1560	1569	NISGSLEHNK	N1GlcNAc@dEK10dE	1560	N2H8F0S0	01Y41Y41M(31M21M21M)61M(31M21M)61M	Mannose	68.04	2	N,0;	1	iI2-3-X35/B,
TR3	23753	109.62	972.096	972.093	3	3.49406	O60673	REV3L_HUMAN	DNA polymerase zeta catalytic subunit	1560	1569	NISGSLEHNK	N1GlcNAc@dEK10dE	1560	N2H8F0S0	01Y41Y41M(31M21M21M31G)61M(31M)61M	Mannose	64.13	1	N,0;	2	iIII3-3-X12/B,iI2-3-X25/C,
TR3	23753	109.62	972.096	972.092	3	4.68016	Q9P1A6	DLGP2_HUMAN	Disks large-associated protein 2	251	261	SNANGTKADGR	S1dEN4GlcNAcK7dE	254	N2H8F0S0	01Y41Y41M(31M21M21M31G)61M(31M)61M	Mannose	61.52	1	N,0;	2	iIII3-3-X12/B,iI2-3-X25/C,
TR3	23753	109.62	972.096	972.089	3	7.33425	Q5CZC0	FSIP2_HUMAN	Fibrous sheath-interacting protein 2	1181	1190	ASNYISNTTK	A1dEN7GlcNAcK10dE	1187	N2H8F0S0	01Y41Y41M(31M21M21M31G)61M(31M)61M	Mannose	55.47	2	N,1;	2	iIII3-3-X12/B,iI2-3-X25/C,
TR3	23762	109.66	1099.48	1099.48	4	1.71773	P15328	FOLR1_HUMAN	Folate receptor alpha	63	83	NACCSTNTSQEAHKDVSYLYR	N1dEC3CamC4CamN7GlcNAcK14dE	69	N4H5F1S0	01Y41Y41M(31M)61M(21Y(31F)41L)61Y41L	Complex	134.26	1	N,0;	0
TR3	23762	109.66	1099.48	1099.48	4	1.71773	P15328	FOLR1_HUMAN	Folate receptor alpha	63	83	NACCSTNTSQEAHKDVSYLYR	N1GlcNAc@dEC3CamC4CamK14dE	63	N4H5F1S0	01Y41Y41M(31M)61M(21Y(31F)41L)61Y41L	Complex	122.94	1	N,0;	0
TR2	23706	109.67	986.424	986.43	3	-6.61471	Q9UNY4	TTF2_HUMAN	Transcription termination factor 2	877	890	GNQSGRSPNNPFSR	G1dEN2GlcNAc	878	N2H6F0S0	01Y41Y41M(31M21M)61M(31M)61M	Mannose	164.63	1	N,2;	1	iI2-3-A34/Y,
TR2	23706	109.67	986.424	986.43	3	-6.61471	Q9UNY4	TTF2_HUMAN	Transcription termination factor 2	877	890	GNQSGRSPNNPFSR	G1dEN2GlcNAc	878	N2H6F0S0	01Y41Y41M(31M)61M(31M21M)61M	Mannose	159.68	1	N,2;	4	iI2-3-X15/C,iI2-3-X35/B,iI2-3-X45/C,iI2-3-B/Y,C/Z,
TR1	23815	109.97	892.758	892.75	3	9.80217	P35869	AHR_HUMAN	Aryl hydrocarbon receptor	431	438	TKNGTSGK	T1dEK2dEN3GlcNAcK8dE	433	N2H8F0S0	01Y41Y41M(31M21M21M31G)61M(31M)61M	Mannose	48.36	1	N,1;	1	25AIII2,
TR1	23815	109.97	892.758	892.75	3	9.80217	P35869	AHR_HUMAN	Aryl hydrocarbon receptor	431	438	TKNGTSGK	T1dEK2dEN3GlcNAcK8dE	433	N2H8F0S0	01Y41Y41M(31M21M21M)61M(31M21M)61M	Mannose	41.14	1	N,1;	2	iI2-3-X25/C,iI2-3-X35/B,
TR1	23832	110.05	954.454	954.459	3	-5.34694	Q05655	KPCD_HUMAN	Protein kinase C delta type	605	613	TINWTLLEK	T1dEN3GlcNAcK9dE	607	N4H5F0S0	01Y41Y41M(31M41Y41L)61M61Y41L	Complex	47.18	1	N,1;	0
TR1	23832	110.05	954.454	954.451	3	3.45074	P13473	LAMP2_HUMAN	Lysosome-associated membrane glycoprotein 2	352	361	VQPFNVTQGK	V1dEN5GlcNAcK10dE	356	N4H5F0S0	01Y41Y41M(31M41Y41L)61M61Y41L	Complex	46.29	1	N,0;	0
TR1	23832	110.05	954.454	954.451	3	3.45074	P13473	LAMP2_HUMAN	Lysosome-associated membrane glycoprotein 2	352	361	VQPFNVTQGK	V1dEN5GlcNAcK10dE	356	N4H5F0S0	01Y41Y41M(31M)61M(21Y41L)61Y41L	Complex	39.83	1	N,0;	5	iI2-3-X15/C,iI4-4-X15/C,iI2-3-X35/B,iI4-4-X35/B,iI2-3-X45/C,iI4-4-X45/C,iI2-3-A03/Z,iII4-5-A15/Z,
TR1	23849	110.14	952.754	952.752	3	2.03238	P48167	GLRB_HUMAN	Glycine receptor subunit beta	235	245	KEDIEYGNCTK	K1dEN8GlcNAcC9CamK11dE	242	N2H6F0S0	01Y41Y41M(31M)61M(31M21M)61M	Mannose	34.9	1	N,1;	4	iI2-3-X15/C,iI2-3-X35/B,iI2-3-X45/C,iI2-3-B/Y,C/Z,
TR3	23888	110.23	1008.46	1008.46	3	0.233626	Q15165	PON2_HUMAN	Serum paraoxonase/arylesterase 2	250	259	HTNMNLTQLK	H1dEN5GlcNAcK10dE	254	N2H8F0S0	01Y41Y41M(31M21M21M31G)61M(31M)61M	Mannose	125.7	2	N,2;	1	iIII3-3-X12/B,
TR2	23831	110.24	1172.25	1172.25	4	1.86439	P15328	FOLR1_HUMAN	Folate receptor alpha	63	83	NACCSTNTSQEAHKDVSYLYR	N1dEC3CamC4CamN7GlcNAcK14dE	69	N4H5F1S1	01Y(61F)41Y41M(31M41Y41L)61M61Y41L32S	Complex	174.21	1	N,0;	3	iI3-4-X25/B,iI3-4-X45/B,iI3-4-X45/C,
TR2	23831	110.24	1172.25	1172.25	4	1.86439	P15328	FOLR1_HUMAN	Folate receptor alpha	63	83	NACCSTNTSQEAHKDVSYLYR	N1GlcNAc@dEC3CamC4CamK14dE	63	N4H5F1S1	01Y(61F)41Y41M(31M41Y41L)61M61Y41L32S	Complex	163.39	1	N,0;	3	iI3-4-X25/B,iI3-4-X45/B,iI3-4-X45/C,
TR2	23831	110.24	1172.25	1172.25	4	1.86439	P15328	FOLR1_HUMAN	Folate receptor alpha	63	83	NACCSTNTSQEAHKDVSYLYR	N1dEC3CamC4CamN7GlcNAcK14dE	69	N4H5F1S1	01Y(61F)41Y41M(31M41Y41L32S)(41Y)61M61M	Hybrid	161.97	1	N,0;	0
TR2	23831	110.24	1172.25	1172.25	4	1.86439	P15328	FOLR1_HUMAN	Folate receptor alpha	63	83	NACCSTNTSQEAHKDVSYLYR	N1GlcNAc@dEC3CamC4CamK14dE	63	N4H5F1S1	01Y(61F)41Y41M(31M41Y41L32S)(41Y)61M61M	Hybrid	151.15	1	N,0;	0
TR1	23873	110.25	931.95	931.951	4	-1.74688	P26012	ITB8_HUMAN	Integrin beta-8	446	460	NYAIIKPIGFNETAK	N1dEK6dEN11GlcNAcK15dE	456	N2H9F0S0	01Y41Y41M(31M21M21M31G31G)61M(31M)61M	Mannose	87.25	1	N,1;	1	iIII3-3-X12/B,iIII4-7-X12/B,
TR1	23873	110.25	931.95	931.951	4	-1.74688	P26012	ITB8_HUMAN	Integrin beta-8	446	460	NYAIIKPIGFNETAK	N1dEK6dEN11GlcNAcK15dE	456	N2H9F0S0	01Y41Y41M(31M21M21M)61M(31M21M)61M21M	Mannose	81.32	1	N,1;	2	35AI3,iI2-3-X35/B,
TR1	23876	110.27	891.187	891.188	4	-1.31313	O43295	SRGP3_HUMAN	SLIT-ROBO Rho GTPase-activating protein 3	445	459	EYVNGSNLITKLQAK	E1dEN4GlcNAcK11dEK15dE	448	N2H8F0S0	01Y41Y41M(31M21M)61M(31M21M)61M21M	Mannose	75.9	2	N,1;	2	45AI3,iI2-3-B/Y,C/Z,
TR1	23876	110.27	891.187	891.188	4	-1.31313	O43295	SRGP3_HUMAN	SLIT-ROBO Rho GTPase-activating protein 3	445	459	EYVNGSNLITKLQAK	E1dEN4GlcNAcK11dEK15dE	448	N2H8F0S0	01Y41Y41M(31M21M21M)61M(31M21M)61M	Mannose	75.9	2	N,1;	1	iI2-3-X45/C,
TR1	23876	110.27	891.187	891.188	4	-1.31313	O43295	SRGP3_HUMAN	SLIT-ROBO Rho GTPase-activating protein 3	445	459	EYVNGSNLITKLQAK	E1dEN4GlcNAcK11dEK15dE	448	N2H8F0S0	01Y41Y41M(31M21M21M31G)61M(31M)61M	Mannose	69.8	1	N,1;	2	25AIII2,iIII3-3-X12/B,
TR1	23945	110.61	891.437	891.438	4	-1.59236	P26012	ITB8_HUMAN	Integrin beta-8	446	460	NYAIIKPIGFNETAK	N1dEK6dEN11GlcNAcK15dE	456	N2H8F0S0	01Y41Y41M(31M21M21M31G)61M(31M)61M	Mannose	113.39	1	N,1;	1	iI2-3-X01/C,
TR1	23945	110.61	891.437	891.438	4	-1.59236	P26012	ITB8_HUMAN	Integrin beta-8	446	460	NYAIIKPIGFNETAK	N1dEK6dEN11GlcNAcK15dE	456	N2H8F0S0	01Y41Y41M(31M21M21M)61M(31M21M)61M	Mannose	109.03	1	N,1;	1	iI2-3-X25/C,
TR3	24028	110.87	1172.26	1172.25	4	2.48919	P15328	FOLR1_HUMAN	Folate receptor alpha	63	83	NACCSTNTSQEAHKDVSYLYR	N1dEC3CamC4CamN7GlcNAcK14dE	69	N4H5F1S1	01Y41Y41M(31M41Y(31F)41L)61M61Y41L32S	Complex	119.73	1	N,0;	1	iII4-5-A35/Z,
TR3	24028	110.87	1172.26	1172.25	4	2.48919	P15328	FOLR1_HUMAN	Folate receptor alpha	63	83	NACCSTNTSQEAHKDVSYLYR	N1GlcNAc@dEC3CamC4CamK14dE	63	N4H5F1S1	01Y41Y41M(31M41Y(31F)41L)61M61Y41L32S	Complex	113.52	1	N,0;	1	iII4-5-A35/Z,
TR2	23986	110.96	952.422	952.417	3	5.13869	Q96HE7	ERO1A_HUMAN	ERO1-like protein alpha	277	287	WGHNITEFQQR	W1dEN4GlcNAc	280	N2H6F0S0	01Y41Y41M(31M21M)61M(31M)61M	Mannose	108.29	1	N,1;	2	iI2-3-A34/Y,iI2-3-B/Y,C/Z,
TR2	23986	110.96	952.422	952.417	3	5.13869	Q96HE7	ERO1A_HUMAN	ERO1-like protein alpha	277	287	WGHNITEFQQR	W1dEN4GlcNAc	280	N2H6F0S0	01Y41Y41M(31M)61M(31M21M)61M	Mannose	97.87	1	N,1;	4	iI2-3-X15/C,iI2-3-X45/C,iI2-3-A15/Z,iI2-3-B/Y,C/Z,
TR2	23987	110.96	971.123	971.127	3	-3.87792	Q96KA5	CLP1L_HUMAN	Cleft lip and palate transmembrane protein 1-like protein	222	230	VKDLMVINR	V1dEK2dEN8GlcNAc	229	N2H8F0S0	01Y41Y41M(31M21M)61M(31M21M)61M21M	Mannose	86.35	1	N,3;	2	45AI3,iI2-3-B/Y,C/Z,
TR2	23987	110.96	971.123	971.127	3	-3.87792	Q96KA5	CLP1L_HUMAN	Cleft lip and palate transmembrane protein 1-like protein	222	230	VKDLMVINR	V1dEK2dEN8GlcNAc	229	N2H8F0S0	01Y41Y41M(31M21M21M)61M(31M21M)61M	Mannose	84.28	1	N,3;	1	iI3-3-X15/B,
TR2	23987	110.96	971.123	971.121	3	2.50849	Q8NF91	SYNE1_HUMAN	Nesprin-1	6579	6588	SGLNQNLTLK	S1dEN6GlcNAcK10dE	6584	N2H8F0S0	01Y41Y41M(31M21M)61M(31M21M)61M21M	Mannose	84.12	2	N,0;	2	45AI3,iI2-3-B/Y,C/Z,
TR2	23987	110.96	971.123	971.121	3	2.50849	Q8NF91	SYNE1_HUMAN	Nesprin-1	6579	6588	SGLNQNLTLK	S1dEN6GlcNAcK10dE	6584	N2H8F0S0	01Y41Y41M(31M21M21M)61M(31M21M)61M	Mannose	84.12	2	N,0;	1	iI3-3-X15/B,
TR2	23987	110.96	971.123	971.121	3	2.50849	Q8NF91	SYNE1_HUMAN	Nesprin-1	6579	6588	SGLNQNLTLK	S1dEN6GlcNAcK10dE	6584	N2H8F0S0	01Y41Y41M(31M21M21M31G)61M(31M)61M	Mannose	80.03	1	N,0;	2	iIII3-3-X12/B,iI2-3-X25/C,
TR2	23986	110.96	952.422	952.41	3	13.2308	Q9NX38	F206A_HUMAN	Protein Simiate	65	76	SISYQISTNCSR	S1dEN9GlcNAcC10Cam	73	N2H6F0S0	01Y41Y41M(31M)61M(31M21M)61M	Mannose	56.87	2	N,0;	4	iI2-3-X15/C,iI2-3-X45/C,iI2-3-A15/Z,iI2-3-B/Y,C/Z,
TR2	23986	110.96	952.422	952.41	3	13.2308	Q9NX38	F206A_HUMAN	Protein Simiate	65	76	SISYQISTNCSR	S1dEN9GlcNAcC10Cam	73	N2H6F0S0	01Y41Y41M(31M21M)61M(31M)61M	Mannose	56.87	2	N,0;	2	iI2-3-A34/Y,iI2-3-B/Y,C/Z,
TR2	23986	110.96	952.755	952.746	3	9.63106	O95490	AGRL2_HUMAN	Adhesion G protein-coupled receptor L2	326	337	SVYQDNESETGK	S1dEN6GlcNAcK12dE	331	N2H6F0S0	01Y41Y41M(31M21M)61M(31M)61M	Mannose	56.66	1	N,0;	2	iI2-3-A34/Y,iI2-3-B/Y,C/Z,
TR2	23987	110.96	971.123	971.136	3	-12.5245	Q5T2D2	TRML2_HUMAN	Trem-like transcript 2 protein	87	96	VVNITMVALK	V1dEN3GlcNAcK10dE	89	N2H8F0S0	01Y41Y41M(31M21M)61M(31M21M)61M21M	Mannose	53.9	1	N,2;	2	45AI3,iI2-3-B/Y,C/Z,
TR2	23987	110.96	971.123	971.136	3	-12.5245	Q5T2D2	TRML2_HUMAN	Trem-like transcript 2 protein	87	96	VVNITMVALK	V1dEN3GlcNAcK10dE	89	N2H8F0S0	01Y41Y41M(31M21M21M)61M(31M21M)61M	Mannose	48.13	1	N,2;	1	iI3-3-X15/B,
TR2	24084	111.41	1336.31	1336.31	4	-1.50945	P15328	FOLR1_HUMAN	Folate receptor alpha	63	83	NACCSTNTSQEAHKDVSYLYR	N1dEC3CamC4CamN7GlcNAcK14dE	69	N5H6F1S2	01Y41Y41M(31M41Y41L)61M(21Y(31F)41L32S)61Y41L32S	Complex	82.55	1	N,0;	0
TR2	24084	111.41	1336.31	1336.31	4	-1.50945	P15328	FOLR1_HUMAN	Folate receptor alpha	63	83	NACCSTNTSQEAHKDVSYLYR	N1dEC3CamC4CamN7GlcNAcK14dE	69	N5H6F1S2	01Y(61F)41Y41M(31M41Y41L)61M(21Y41L32S)61Y41L32S	Complex	80.55	1	N,0;	0
TR2	24084	111.41	1336.31	1336.31	4	-1.50945	P15328	FOLR1_HUMAN	Folate receptor alpha	63	83	NACCSTNTSQEAHKDVSYLYR	N1GlcNAc@dEC3CamC4CamK14dE	63	N5H6F1S2	01Y41Y41M(31M41Y41L)61M(21Y(31F)41L32S)61Y41L32S	Complex	74.24	1	N,0;	0
TR2	24084	111.41	1336.31	1336.31	4	-1.50945	P15328	FOLR1_HUMAN	Folate receptor alpha	63	83	NACCSTNTSQEAHKDVSYLYR	N1GlcNAc@dEC3CamC4CamK14dE	63	N5H6F1S2	01Y(61F)41Y41M(31M41Y41L)61M(21Y41L32S)61Y41L32S	Complex	72.24	1	N,0;	0
TR2	24111	111.55	1294.12	1294.12	2	-0.572488	P11279	LAMP1_HUMAN	Lysosome-associated membrane glycoprotein 1	255	262	LLNINPNK	L1dEN7GlcNAcK8dE	261	N2H7F0S0	01Y41Y41M(31M21M)61M(31M21M)61M	Mannose	112.28	1	N,4;	1	iI2-3-B/Y,C/Z,
TR2	24111	111.55	1294.12	1294.12	2	-0.572488	P11279	LAMP1_HUMAN	Lysosome-associated membrane glycoprotein 1	255	262	LLNINPNK	L1dEN7GlcNAcK8dE	261	N2H7F0S0	01Y41Y41M(31M)61M(31M21M)61M21M	Mannose	104.89	1	N,4;	1	iI2-3-B/Y,C/Z,
TR1	24145	111.57	1245.03	1245.03	4	3.56505	P15328	FOLR1_HUMAN	Folate receptor alpha	63	83	NACCSTNTSQEAHKDVSYLYR	N1dEC3CamC4CamN7GlcNAcK14dE	69	N4H5F1S2	01Y(61F)41Y41M(31M)61M(21Y41L32S)61Y41L32S	Complex	131.55	1	N,0;	3	iI4-4-X01/B,iI4-4-X45/C,iI4-4-X45/B,
TR1	24145	111.57	1245.03	1245.03	4	3.56505	P15328	FOLR1_HUMAN	Folate receptor alpha	63	83	NACCSTNTSQEAHKDVSYLYR	N1GlcNAc@dEC3CamC4CamK14dE	63	N4H5F1S2	01Y(61F)41Y41M(31M)61M(21Y41L32S)61Y41L32S	Complex	125.17	1	N,0;	3	iI4-4-X01/B,iI4-4-X45/C,iI4-4-X45/B,
TR1	24145	111.57	1245.03	1245.03	4	3.56505	P15328	FOLR1_HUMAN	Folate receptor alpha	63	83	NACCSTNTSQEAHKDVSYLYR	N1dEC3CamC4CamN7GlcNAcK14dE	69	N4H5F1S2	01Y41Y41M(31M)61M(21Y(31F)41L32S)61Y41L32S	Complex	116.86	1	N,0;	0
TR1	24145	111.57	1245.03	1245.03	4	3.56505	P15328	FOLR1_HUMAN	Folate receptor alpha	63	83	NACCSTNTSQEAHKDVSYLYR	N1GlcNAc@dEC3CamC4CamK14dE	63	N4H5F1S2	01Y41Y41M(31M)61M(21Y(31F)41L32S)61Y41L32S	Complex	110.48	1	N,0;	0
TR2	24121	111.6	891.438	891.431	4	7.70343	Q96N38	ZN714_HUMAN	Zinc finger protein 714	464	478	SSNLTKHNIIHTGEK	S1dEN3GlcNAcK6dEK15dE	466	N2H8F0S0	01Y41Y41M(31M21M)61M(31M21M)61M21M	Mannose	95.93	1	N,2;	2	iI2-3-A25/Z,iI2-3-B/Y,C/Z,
TR2	24121	111.6	891.438	891.438	4	-0.496871	P26012	ITB8_HUMAN	Integrin beta-8	446	460	NYAIIKPIGFNETAK	N1dEK6dEN11GlcNAcK15dE	456	N2H8F0S0	01Y41Y41M(31M21M)61M(31M21M)61M21M	Mannose	94.95	1	N,2;	2	iI2-3-A25/Z,iI2-3-B/Y,C/Z,
TR2	24121	111.6	891.438	891.431	4	7.70343	Q96N38	ZN714_HUMAN	Zinc finger protein 714	464	478	SSNLTKHNIIHTGEK	S1dEN3GlcNAcK6dEK15dE	466	N2H8F0S0	01Y41Y41M(31M21M21M)61M(31M21M)61M	Mannose	89.61	1	N,2;	1	iI2-3-X25/C,
TR2	24121	111.6	891.438	891.425	4	13.9878	Q9BSK2	S2533_HUMAN	Solute carrier family 25 member 33	213	228	YLKEAPLASSANGTEK	Y1dEK3dEN12GlcNAcK16dE	224	N2H8F0S0	01Y41Y41M(31M21M)61M(31M21M)61M21M	Mannose	63.92	1	N,1;	2	iI2-3-A25/Z,iI2-3-B/Y,C/Z,
TR2	24121	111.6	891.438	891.425	4	13.9878	Q9BSK2	S2533_HUMAN	Solute carrier family 25 member 33	213	228	YLKEAPLASSANGTEK	Y1dEK3dEN12GlcNAcK16dE	224	N2H8F0S0	01Y41Y41M(31M21M21M)61M(31M21M)61M	Mannose	54.42	1	N,1;	1	iI2-3-X25/C,
TR3	24190	111.61	891.185	891.187	4	-3.10902	Q6V0I7	FAT4_HUMAN	Protocadherin Fat 4	2920	2934	INATTGEIFNKQILK	I1dEN2GlcNAcK11dEK15dE	2921	N2H8F0S0	01Y41Y41M(31M21M)61M(31M21M)61M21M	Mannose	109.19	1	N,0;	1	iI2-3-B/Y,C/Z,
TR3	24190	111.61	891.185	891.187	4	-3.10902	Q6V0I7	FAT4_HUMAN	Protocadherin Fat 4	2920	2934	INATTGEIFNKQILK	I1dEN2GlcNAcK11dEK15dE	2921	N2H8F0S0	01Y41Y41M(31M21M21M)61M(31M21M)61M	Mannose	105.04	1	N,0;	1	iI2-3-X25/C,
TR2	24123	111.61	981.776	981.778	3	-2.65253	Q8TER0	SNED1_HUMAN	Sushi, nidogen and EGF-like domain-containing protein 1	975	984	AYNISVFSVK	A1dEN3GlcNAcK10dE	977	N2H8F0S0	01Y41Y41M(31M21M)61M(31M21M)61M21M	Mannose	67.31	1	N,0;	2	45AI3,iI2-3-B/Y,C/Z,
TR2	24123	111.61	981.776	981.772	3	3.70025	Q86T82	UBP37_HUMAN	Ubiquitin carboxyl-terminal hydrolase 37	289	299	TNVSSQTPSAK	T1dEN2GlcNAcK11dE	290	N2H8F0S0	01Y41Y41M(31M21M)61M(31M21M)61M21M	Mannose	67.23	1	N,0;	2	45AI3,iI2-3-B/Y,C/Z,
TR2	24123	111.61	981.776	981.777	3	-1.48221	Q13106	ZN154_HUMAN	Zinc finger protein 154	421	430	SFSHNSSLIK	S1dEN5GlcNAcK10dE	425	N2H8F0S0	01Y41Y41M(31M21M)61M(31M21M)61M21M	Mannose	64.97	1	N,0;	2	45AI3,iI2-3-B/Y,C/Z,
TR2	24123	111.61	981.776	981.772	3	3.70025	Q15643	TRIPB_HUMAN	Thyroid receptor-interacting protein 11	595	604	SQESNVSIQK	S1dEN5GlcNAcK10dE	599	N2H8F0S0	01Y41Y41M(31M21M)61M(31M21M)61M21M	Mannose	61.19	1	N,0;	2	45AI3,iI2-3-B/Y,C/Z,
TR2	24123	111.61	981.776	981.775	3	0.960303	O95170	CDRT1_HUMAN	CMT1A duplicated region transcript 1 protein	292	300	MLDRHTLNK	M1dEN8GlcNAcK9dE	299	N2H8F0S0	01Y41Y41M(31M21M)61M(31M21M)61M21M	Mannose	59.41	1	N,2;	2	45AI3,iI2-3-B/Y,C/Z,
TR2	24123	111.61	981.776	981.777	3	-1.27442	O14628	ZN195_HUMAN	Zinc finger protein 195	112	122	AQPGLNVSVDK	A1dEN6GlcNAcK11dE	117	N2H8F0S0	01Y41Y41M(31M21M)61M(31M21M)61M21M	Mannose	59.02	1	N,0;	2	45AI3,iI2-3-B/Y,C/Z,
TR2	24123	111.61	982.116	982.106	3	9.74307	Q13009	TIAM1_HUMAN	T-lymphoma invasion and metastasis-inducing protein 1	902	912	AADALNSSMLK	A1dEN6GlcNAcK11dE	907	N2H8F0S0	01Y41Y41M(31M21M)61M(31M21M)61M21M	Mannose	54.21	1	N,0;	2	45AI3,iI2-3-B/Y,C/Z,
TR2	24123	111.61	981.776	981.772	3	3.70025	Q86T82	UBP37_HUMAN	Ubiquitin carboxyl-terminal hydrolase 37	289	299	TNVSSQTPSAK	T1dEN2GlcNAcK11dE	290	N2H8F0S0	01Y41Y41M(31M21M21M)61M(31M21M)61M	Mannose	54.21	1	N,0;	2	iI2-3-X25/C,iI2-3-X35/B,
TR2	24123	111.61	981.776	981.777	3	-1.48221	Q13106	ZN154_HUMAN	Zinc finger protein 154	421	430	SFSHNSSLIK	S1dEN5GlcNAcK10dE	425	N2H8F0S0	01Y41Y41M(31M21M21M)61M(31M21M)61M	Mannose	49.83	1	N,0;	2	iI2-3-X25/C,iI2-3-X35/B,
TR2	24123	111.61	982.116	982.106	3	9.55571	Q9UQP3	TENN_HUMAN	Tenascin-N	1147	1157	LHNLTTGTPAR	L1dEN3GlcNAc	1149	N2H8F0S0	01Y41Y41M(31M21M)61M(31M21M)61M21M	Mannose	49.65	1	N,2;	2	45AI3,iI2-3-B/Y,C/Z,
TR2	24123	111.61	981.776	981.772	3	3.70025	Q15643	TRIPB_HUMAN	Thyroid receptor-interacting protein 11	595	604	SQESNVSIQK	S1dEN5GlcNAcK10dE	599	N2H8F0S0	01Y41Y41M(31M21M21M)61M(31M21M)61M	Mannose	48.17	1	N,0;	2	iI2-3-X25/C,iI2-3-X35/B,
TR2	24123	111.61	982.116	982.106	3	9.74307	Q13009	TIAM1_HUMAN	T-lymphoma invasion and metastasis-inducing protein 1	902	912	AADALNSSMLK	A1dEN6GlcNAcK11dE	907	N2H8F0S0	01Y41Y41M(31M21M21M)61M(31M21M)61M	Mannose	45.36	2	N,0;	2	iI2-3-X25/C,iI2-3-X35/B,
TR2	24123	111.61	982.116	982.106	3	9.74307	Q13009	TIAM1_HUMAN	T-lymphoma invasion and metastasis-inducing protein 1	902	912	AADALNSSMLK	A1dEN6GlcNAcK11dE	907	N2H8F0S0	01Y41Y41M(31M21M21M31G)61M(31M)61M	Mannose	45.36	2	N,0;	2	iIII3-3-X12/B,iI2-3-X25/C,
TR3	24233	111.8	931.949	931.944	4	5.04798	Q96N38	ZN714_HUMAN	Zinc finger protein 714	464	478	SSNLTKHNIIHTGEK	S1dEN3GlcNAcK6dEK15dE	466	N2H9F0S0	01Y41Y41M(31M21M21M)61M(31M21M)61M21M	Mannose	96.56	1	N,1;	1	iI2-3-X25/C,
TR3	24233	111.8	931.949	931.944	4	5.04798	Q96N38	ZN714_HUMAN	Zinc finger protein 714	464	478	SSNLTKHNIIHTGEK	S1dEN3GlcNAcK6dEK15dE	466	N2H9F0S0	01Y41Y41M(31M21M21M31G31G)61M(31M)61M	Mannose	82.47	1	N,1;	1	iIII3-3-X12/B,iIII4-7-X12/B,
TR3	24255	111.9	952.422	952.411	3	11.1043	Q8N1G0	ZN687_HUMAN	Zinc finger protein 687	559	569	IEVTCNHCARR	I1dEC5CamN6GlcNAcC8Cam	564	N2H6F0S0	01Y41Y41M(31M21M)61M(31M)61M	Mannose	76.28	1	N,0;	3	iI2-3-A34/Y,iI2-3-A24/Z,iI2-3-B/Y,C/Z,
TR3	24255	111.9	952.422	952.411	3	11.1043	Q8N1G0	ZN687_HUMAN	Zinc finger protein 687	559	569	IEVTCNHCARR	I1dEC5CamN6GlcNAcC8Cam	564	N2H6F0S0	01Y41Y41M(31M)61M(31M21M)61M	Mannose	72.16	1	N,0;	4	iI2-3-X15/C,iI2-3-X35/B,iI2-3-X45/C,iI2-3-B/Y,C/Z,
TR3	24255	111.9	952.75	952.746	3	4.31388	O95490	AGRL2_HUMAN	Adhesion G protein-coupled receptor L2	326	337	SVYQDNESETGK	S1dEN6GlcNAcK12dE	331	N2H6F0S0	01Y41Y41M(31M)61M(31M21M)61M	Mannose	57.97	1	N,0;	4	iI2-3-X15/C,iI2-3-X35/B,iI2-3-X45/C,iI2-3-B/Y,C/Z,
TR3	24255	111.9	952.422	952.413	3	9.03273	Q9UMY1	NOL7_HUMAN	Nucleolar protein 7	146	156	NEDCEKGNDSK	N1dEC4CamK6dEN8GlcNAcK11dE	153	N2H6F0S0	01Y41Y41M(31M)61M(31M21M)61M	Mannose	48.5	1	N,0;	4	iI2-3-X15/C,iI2-3-X35/B,iI2-3-X45/C,iI2-3-B/Y,C/Z,
TR3	24255	111.9	952.422	952.413	3	9.03273	Q9UMY1	NOL7_HUMAN	Nucleolar protein 7	146	156	NEDCEKGNDSK	N1dEC4CamK6dEN8GlcNAcK11dE	153	N2H6F0S0	01Y41Y41M(31M21M)61M(31M)61M	Mannose	44.76	1	N,0;	3	iI2-3-A34/Y,iI2-3-A24/Z,iI2-3-B/Y,C/Z,
TR3	24255	111.9	952.422	952.428	3	-6.241	O94779	CNTN5_HUMAN	Contactin-5	396	408	LNDTQLDSGSPLR	L1dEN2GlcNAc	397	N2H6F0S0	01Y41Y41M(31M)61M(31M21M)61M	Mannose	38.95	1	N,0;	4	iI2-3-X15/C,iI2-3-X35/B,iI2-3-X45/C,iI2-3-B/Y,C/Z,
TR3	24255	111.9	952.422	952.428	3	-6.241	O94779	CNTN5_HUMAN	Contactin-5	396	408	LNDTQLDSGSPLR	L1dEN2GlcNAc	397	N2H6F0S0	01Y41Y41M(31M21M)61M(31M)61M	Mannose	37.19	1	N,0;	3	iI2-3-A34/Y,iI2-3-A24/Z,iI2-3-B/Y,C/Z,
TR3	24258	111.92	1172.25	1172.25	4	-0.530676	P15328	FOLR1_HUMAN	Folate receptor alpha	63	83	NACCSTNTSQEAHKDVSYLYR	N1dEC3CamC4CamN7GlcNAcK14dE	69	N4H5F1S1	01Y41Y41M(31M)61M(21Y41L32S)61Y(31F)41L	Complex	98.91	1	N,0;	0
TR3	24258	111.92	1172.25	1172.25	4	-0.530676	P15328	FOLR1_HUMAN	Folate receptor alpha	63	83	NACCSTNTSQEAHKDVSYLYR	N1dEC3CamC4CamN7GlcNAcK14dE	69	N4H5F1S1	01Y41Y41M(31M)61M(21Y(31F)41L32S)61Y41L	Complex	94.8	1	N,0;	0
TR3	24258	111.92	1172.25	1172.25	4	-0.530676	P15328	FOLR1_HUMAN	Folate receptor alpha	63	83	NACCSTNTSQEAHKDVSYLYR	N1GlcNAc@dEC3CamC4CamK14dE	63	N4H5F1S1	01Y41Y41M(31M)61M(21Y41L32S)61Y(31F)41L	Complex	90.15	1	N,0;	0
TR3	24258	111.92	1172.25	1172.25	4	-0.530676	P15328	FOLR1_HUMAN	Folate receptor alpha	63	83	NACCSTNTSQEAHKDVSYLYR	N1GlcNAc@dEC3CamC4CamK14dE	63	N4H5F1S1	01Y41Y41M(31M)61M(21Y(31F)41L32S)61Y41L	Complex	86.04	1	N,0;	0
TR1	24233	111.99	812.16	812.164	5	-5.19837	Q8WXI7	MUC16_HUMAN	Mucin-16	93	115	GMTHSEQRTSPSLSPQVNGTPSR	G1dEN18GlcNAc	110	N2H7F0S0	01Y41Y41M(31M)61M(31M21M)61M21M	Mannose	45.98	1	N,0;	8	iI2-3-X15/C,iI2-3-X35/B,iI2-3-X45/C,iI2-4-X25/C,45AI3,iI2-3-A35/Z,iI2-3-X35/C,iI2-3-B/Y,C/Z,
TR1	24233	111.99	812.16	812.164	5	-5.19837	Q8WXI7	MUC16_HUMAN	Mucin-16	93	115	GMTHSEQRTSPSLSPQVNGTPSR	G1dEN18GlcNAc	110	N2H7F0S0	01Y41Y41M(31M21M)61M(31M21M)61M	Mannose	35.33	1	N,0;	2	iI2-3-X45/B,iI2-3-A25/Z,
TR1	24242	112.03	779.946	779.941	5	6.42585	O15063	K0355_HUMAN	Uncharacterized protein KIAA0355	600	622	TTDPSQSAQNSSNTVANGFLMER	T1dEN10GlcNAc	609	N2H6F0S0	01Y41Y41M(31M21M)61M(31M)61M	Mannose	38.25	1	N,0;	5	iI2-3-A34/Y,iI2-3-X45/B,35AI3,iI2-3-A35/Y,iI2-3-A34/Y,04AI3,iI2-3-A24/Y,
TR1	24421	112.89	819.172	819.17	5	3.21078	Q9BVK6	TMED9_HUMAN	Transmembrane emp24 domain-containing protein 9	108	128	FTFTSHTPGEHQICLHSNSTK	F1dEC14CamN18GlcNAcK21dE	125	N2H7F0S0	01Y41Y41M(31M21M)61M(31M21M)61M	Mannose	109.28	1	N,3;	3	iI2-3-X45/B,iI2-3-X45/B,iI2-3-B/Y,C/Z,
TR1	24421	112.89	819.172	819.17	5	3.21078	Q9BVK6	TMED9_HUMAN	Transmembrane emp24 domain-containing protein 9	108	128	FTFTSHTPGEHQICLHSNSTK	F1dEC14CamN18GlcNAcK21dE	125	N2H7F0S0	01Y41Y41M(31M21M21M)61M(31M)61M	Mannose	99.01	1	N,3;	4	iI2-3-A15/Z,iIII2-3-A15/Z,iI2-3-X45/C,iI2-3-X25/C,iIII3-3-X12/B,
TR1	24430	112.93	786.757	786.759	5	-1.94432	Q9BVK6	TMED9_HUMAN	Transmembrane emp24 domain-containing protein 9	108	128	FTFTSHTPGEHQICLHSNSTK	F1dEC14CamN18GlcNAcK21dE	125	N2H6F0S0	01Y41Y41M(31M)61M(31M21M)61M	Mannose	105.1	1	N,3;	3	iI2-3-X15/C,iI2-3-X45/C,iI2-3-B/Y,C/Z,
TR1	24430	112.93	786.757	786.759	5	-1.94432	Q9BVK6	TMED9_HUMAN	Transmembrane emp24 domain-containing protein 9	108	128	FTFTSHTPGEHQICLHSNSTK	F1dEC14CamN18GlcNAcK21dE	125	N2H6F0S0	01Y41Y41M(31M21M)61M(31M)61M	Mannose	93.02	1	N,3;	7	iI2-3-A34/Y,iI2-3-X45/B,iI2-3-A24/Z,iI2-3-A25/Z,iI2-3-A03/Z,iI2-3-A34/Y,04AI3,iI2-3-A24/Y,
TR3	24559	113.36	844.575	844.562	5	14.9641	Q99706	KI2L4_HUMAN	Killer cell immunoglobulin-like receptor 2DL4	138	159	AGENVTLSCSSQSSFDIYHLSR	A1dEN4GlcNAcC9Cam	141	N2H8F0S0	01Y41Y41M(31M21M)61M(31M21M)61M21M	Mannose	53.85	1	N,0;	2	iI2-3-X45/B,iI2-3-A25/Z,
TR1	24524	113.37	993.125	993.124	3	0.379504	O00469	PLOD2_HUMAN	Procollagen-lysine,2-oxoglutarate 5-dioxygenase 2	206	215	EAINITLDHK	E1dEN4GlcNAcK10dE	209	N2H8F0S0	01Y41Y41M(31M21M21M31G)61M(31M)61M	Mannose	151.59	1	N,1;	2	02AIII2,iIII3-3-X12/B,
TR1	24524	113.37	993.125	993.12	3	5.07582	Q9BXY5	CAYP2_HUMAN	Calcyphosin-2	160	169	SNVTHKQSPR	S1dEN2GlcNAcK6dE	161	N2H8F0S0	01Y41Y41M(31M21M21M31G)61M(31M)61M	Mannose	118.23	1	N,0;	2	02AIII2,iIII3-3-X12/B,
TR1	24524	113.37	993.125	993.12	3	5.07582	Q9BXY5	CAYP2_HUMAN	Calcyphosin-2	160	169	SNVTHKQSPR	S1dEN2GlcNAcK6dE	161	N2H8F0S0	01Y41Y41M(31M21M21M)61M(31M21M)61M	Mannose	111.72	1	N,0;	3	iI2-3-X25/C,iI3-3-X15/B,iI2-3-X35/B,
TR1	24524	113.37	993.125	993.122	3	2.79311	Q8NEN9	PDZD8_HUMAN	PDZ domain-containing protein 8	769	778	TALRNLSMQK	T1dEN5GlcNAcK10dE	773	N2H8F0S0	01Y41Y41M(31M21M21M31G)61M(31M)61M	Mannose	103.14	1	N,0;	2	02AIII2,iIII3-3-X12/B,
TR1	24524	113.37	993.125	993.118	3	6.55299	Q8NCY6	MSD4_HUMAN	Myb/SANT-like DNA-binding domain-containing protein 4	35	44	QLNTTINVMK	Q1dEN3GlcNAcK10dE	37	N2H8F0S0	01Y41Y41M(31M21M21M31G)61M(31M)61M	Mannose	96.88	1	N,1;	2	02AIII2,iIII3-3-X12/B,
TR1	24524	113.37	993.125	993.122	3	2.79311	Q8NEN9	PDZD8_HUMAN	PDZ domain-containing protein 8	769	778	TALRNLSMQK	T1dEN5GlcNAcK10dE	773	N2H8F0S0	01Y41Y41M(31M21M21M)61M(31M21M)61M	Mannose	96.84	1	N,0;	3	iI2-3-X25/C,iI3-3-X15/B,iI2-3-X35/B,
TR1	24524	113.37	993.125	993.118	3	6.55299	Q8NCY6	MSD4_HUMAN	Myb/SANT-like DNA-binding domain-containing protein 4	35	44	QLNTTINVMK	Q1dEN3GlcNAcK10dE	37	N2H8F0S0	01Y41Y41M(31M21M21M)61M(31M21M)61M	Mannose	90.58	1	N,1;	3	iI2-3-X25/C,iI3-3-X15/B,iI2-3-X35/B,
TR1	24524	113.37	993.46	993.454	3	6.50279	A6NG13	MGT4D_HUMAN	Alpha-1,3-mannosyl-glycoprotein 4-beta-N-acetylglucosaminyltransferase-like protein MGAT4D	47	55	ENMLHLRNK	E1dEN8GlcNAcK9dE	54	N2H8F0S0	01Y41Y41M(31M21M)61M(31M21M)61M21M	Mannose	64.43	1	N,2;	3	iI2-3-X15/B,iI2-3-X15/C,iI2-3-B/Y,C/Z,
TR1	24524	113.37	993.46	993.454	3	6.50279	A6NG13	MGT4D_HUMAN	Alpha-1,3-mannosyl-glycoprotein 4-beta-N-acetylglucosaminyltransferase-like protein MGAT4D	47	55	ENMLHLRNK	E1dEN8GlcNAcK9dE	54	N2H8F0S0	01Y41Y41M(31M21M21M)61M(31M21M)61M	Mannose	60.54	1	N,2;	3	iI2-3-X25/C,iI3-3-X15/B,iI2-3-X35/B,
TR3	24599	113.55	1245.28	1245.28	4	-0.633987	P15328	FOLR1_HUMAN	Folate receptor alpha	63	83	NACCSTNTSQEAHKDVSYLYR	N1dEC3CamC4CamN7GlcNAcK14dE	69	N4H5F3S1	01Y(61F)41Y41M(31M)61M(21Y(31F)41L32S)61Y(31F)41L	Complex	65.23	1	N,0;	0
TR3	24599	113.55	1245.28	1245.28	4	-0.633987	P15328	FOLR1_HUMAN	Folate receptor alpha	63	83	NACCSTNTSQEAHKDVSYLYR	N1GlcNAc@dEC3CamC4CamK14dE	63	N4H5F3S1	01Y(61F)41Y41M(31M)61M(21Y(31F)41L32S)61Y(31F)41L	Complex	54.71	1	N,0;	0
TR3	24601	113.56	898.696	898.691	4	5.2673	Q15018	ABRX2_HUMAN	BRISC complex subunit Abraxas 2	175	190	VSSVPNTSQSYAKVIK	V1dEN6GlcNAcK13dEK16dE	180	N2H8F0S0	01Y41Y41M(31M21M)61M(31M21M)61M21M	Mannose	147.34	1	N,1;	2	45AI3,iI2-3-B/Y,C/Z,
TR3	24601	113.56	898.696	898.691	4	5.2673	Q15018	ABRX2_HUMAN	BRISC complex subunit Abraxas 2	175	190	VSSVPNTSQSYAKVIK	V1dEN6GlcNAcK13dEK16dE	180	N2H8F0S0	01Y41Y41M(31M21M21M)61M(31M21M)61M	Mannose	136.19	1	N,1;	2	iI2-3-X25/C,iI2-3-X45/C,
TR3	24750	114.28	851.581	851.58	5	1.09524	Q9BVK6	TMED9_HUMAN	Transmembrane emp24 domain-containing protein 9	108	128	FTFTSHTPGEHQICLHSNSTK	F1dEC14CamN18GlcNAcK21dE	125	N2H8F0S0	01Y41Y41M(31M21M)61M(31M21M)61M21M	Mannose	135.19	1	N,2;	3	iI2-3-X45/B,iI2-3-A25/Z,iI3-4-X35/C,
TR3	24750	114.28	851.581	851.58	5	1.09524	Q9BVK6	TMED9_HUMAN	Transmembrane emp24 domain-containing protein 9	108	128	FTFTSHTPGEHQICLHSNSTK	F1dEC14CamN18GlcNAcK21dE	125	N2H8F0S0	01Y41Y41M(31M21M21M)61M(31M21M)61M	Mannose	126.98	1	N,2;	3	iIII3-3-X12/B,iI2-3-X25/C,iI2-3-X45/C,
TR3	24750	114.28	851.581	851.577	5	4.56763	Q3ZCX4	ZN568_HUMAN	Zinc finger protein 568	607	626	SHTGEKPFECNECGKAFSQR	S1dEK6dEC10CamN11GlcNAcC13CamK15dE	617	N2H8F0S0	01Y41Y41M(31M21M)61M(31M21M)61M21M	Mannose	103.21	1	N,0;	3	iI2-3-X45/B,iI2-3-A25/Z,iI3-4-X35/C,
TR3	24750	114.28	851.581	851.577	5	4.56763	Q3ZCX4	ZN568_HUMAN	Zinc finger protein 568	607	626	SHTGEKPFECNECGKAFSQR	S1dEK6dEC10CamN11GlcNAcC13CamK15dE	617	N2H8F0S0	01Y41Y41M(31M21M21M)61M(31M21M)61M	Mannose	97.07	1	N,0;	3	iIII3-3-X12/B,iI2-3-X25/C,iI2-3-X45/C,
TR2	24690	114.32	993.125	993.124	3	0.871166	O00469	PLOD2_HUMAN	Procollagen-lysine,2-oxoglutarate 5-dioxygenase 2	206	215	EAINITLDHK	E1dEN4GlcNAcK10dE	209	N2H8F0S0	01Y41Y41M(31M21M)61M(31M21M)61M21M	Mannose	149.2	2	N,1;	8	iI2-3-A25/Z,45AI4,iI3-4-X45/C,iI2-3-X01/B,iI2-3-X15/B,iI2-3-X15/C,iI2-3-X45/B,iI2-3-B/Y,C/Z,
TR2	24690	114.32	993.125	993.124	3	0.871166	O00469	PLOD2_HUMAN	Procollagen-lysine,2-oxoglutarate 5-dioxygenase 2	206	215	EAINITLDHK	E1dEN4GlcNAcK10dE	209	N2H8F0S0	01Y41Y41M(31M21M21M)61M(31M21M)61M	Mannose	149.2	2	N,1;	2	iI2-3-X25/C,iI2-3-X35/B,
TR2	24690	114.32	993.125	993.126	3	-0.491201	Q8TF20	ZN721_HUMAN	Zinc finger protein 721	43	51	SMNVCKVQK	S1dEN3GlcNAcC5CamK6dEK9dE	45	N2H8F0S0	01Y41Y41M(31M21M)61M(31M21M)61M21M	Mannose	105.27	2	N,0;	9	iI2-3-A25/Z,45AI4,iI3-4-X45/C,iI2-3-X01/B,iI2-3-X15/B,iI2-3-X15/C,iI2-3-X45/B,iI2-3-B/Y,C/Z,25XI4,25XII4,
TR2	24690	114.32	993.125	993.126	3	-0.491201	Q8TF20	ZN721_HUMAN	Zinc finger protein 721	43	51	SMNVCKVQK	S1dEN3GlcNAcC5CamK6dEK9dE	45	N2H8F0S0	01Y41Y41M(31M21M21M)61M(31M21M)61M	Mannose	105.27	2	N,0;	2	iI2-3-X25/C,iI2-3-X35/B,
TR2	24690	114.32	993.125	993.126	3	-0.491201	Q8TF20	ZN721_HUMAN	Zinc finger protein 721	43	51	SMNVCKVQK	S1dEN3GlcNAcC5CamK6dEK9dE	45	N2H8F0S0	01Y41Y41M(31M21M21M31G)61M(31M)61M	Mannose	103.19	1	N,0;	2	02AIII2,iIII3-3-X12/B,
TR2	24690	114.32	993.461	993.457	3	4.05729	Q8NFP4	MDGA1_HUMAN	MAM domain-containing glycosylphosphatidylinositol anchor protein 1	820	830	LVSPLYNASAK	L1dEN7GlcNAcK11dE	826	N2H8F0S0	01Y41Y41M(31M21M21M)61M(31M21M)61M	Mannose	78.51	1	N,0;	2	iI2-3-X25/C,iI2-3-X35/B,
TR2	24690	114.32	993.461	993.457	3	4.05729	P31152	MK04_HUMAN	Mitogen-activated protein kinase 4	199	208	LLLSPNNYTK	L1dEN7GlcNAcK10dE	205	N2H8F0S0	01Y41Y41M(31M21M21M)61M(31M21M)61M	Mannose	76.85	1	N,1;	2	iI2-3-X25/C,iI2-3-X35/B,
TR2	24690	114.32	993.461	993.457	3	4.05729	Q8NFP4	MDGA1_HUMAN	MAM domain-containing glycosylphosphatidylinositol anchor protein 1	820	830	LVSPLYNASAK	L1dEN7GlcNAcK11dE	826	N2H8F0S0	01Y41Y41M(31M21M21M31G)61M(31M)61M	Mannose	76.54	1	N,0;	2	02AIII2,iIII3-3-X12/B,
TR2	24690	114.32	993.461	993.457	3	4.05729	P31152	MK04_HUMAN	Mitogen-activated protein kinase 4	199	208	LLLSPNNYTK	L1dEN7GlcNAcK10dE	205	N2H8F0S0	01Y41Y41M(31M21M21M31G)61M(31M)61M	Mannose	74.88	1	N,1;	2	02AIII2,iIII3-3-X12/B,
TR2	24690	114.32	993.125	993.134	3	-9.09628	Q8NDV3	SMC1B_HUMAN	Structural maintenance of chromosomes protein 1B	303	311	ENTSHHLKK	E1dEN2GlcNAcK8dEK9dE	304	N2H8F0S0	01Y41Y41M(31M21M)61M(31M21M)61M21M	Mannose	61.59	1	N,0;	8	iI2-3-A25/Z,45AI4,iI3-4-X45/C,iI2-3-X01/B,iI2-3-X15/B,iI2-3-X15/C,iI2-3-X45/B,iI2-3-B/Y,C/Z,
TR2	24690	114.32	993.125	993.134	3	-9.09628	Q8NDV3	SMC1B_HUMAN	Structural maintenance of chromosomes protein 1B	303	311	ENTSHHLKK	E1dEN2GlcNAcK8dEK9dE	304	N2H8F0S0	01Y41Y41M(31M21M21M)61M(31M21M)61M	Mannose	59.72	1	N,0;	2	iI2-3-X25/C,iI2-3-X35/B,
TR1	24989	115.56	967.134	967.13	3	4.00252	P07339	CATD_HUMAN	Cathepsin D	257	267	GSLSYLNVTRK	G1dEN7GlcNAcK11dE	263	N2H7F0S0	01Y41Y41M(31M21M21M)61M(31M)61M	Mannose	108.54	1	N,0;	2	iI2-3-X25/C,iIII3-3-X12/B,
TR1	24989	115.56	967.134	967.13	3	4.00252	P07339	CATD_HUMAN	Cathepsin D	257	267	GSLSYLNVTRK	G1dEN7GlcNAcK11dE	263	N2H7F0S0	01Y41Y41M(31M21M)61M(31M21M)61M	Mannose	104.32	1	N,0;	1	iI2-3-X15/B,
TR1	24989	115.56	967.134	967.125	3	8.82611	Q9UQE7	SMC3_HUMAN	Structural maintenance of chromosomes protein 3	27	38	HNVIVGRNGSGK	H1dEN8GlcNAcK12dE	34	N2H7F0S0	01Y41Y41M(31M21M21M)61M(31M)61M	Mannose	99.5	1	N,0;	2	iI2-3-X25/C,iIII3-3-X12/B,
TR1	24989	115.56	967.134	967.125	3	8.82611	Q9UQE7	SMC3_HUMAN	Structural maintenance of chromosomes protein 3	27	38	HNVIVGRNGSGK	H1dEN8GlcNAcK12dE	34	N2H7F0S0	01Y41Y41M(31M21M)61M(31M21M)61M	Mannose	95.25	1	N,0;	1	iI2-3-X15/B,
TR1	24989	115.56	967.134	967.13	3	4.00252	Q9NSI6-2	BRWD1_HUMAN	Isoform B of Bromodomain and WD repeat-containing protein 1	2193	2203	TFTANISKTVR	T1dEN5GlcNAcK8dE	2197	N2H7F0S0	01Y41Y41M(31M21M21M)61M(31M)61M	Mannose	93.51	1	N,0;	2	iI2-3-X25/C,iIII3-3-X12/B,
TR1	24989	115.56	967.134	967.13	3	4.00252	Q9NSI6-2	BRWD1_HUMAN	Isoform B of Bromodomain and WD repeat-containing protein 1	2193	2203	TFTANISKTVR	T1dEN5GlcNAcK8dE	2197	N2H7F0S0	01Y41Y41M(31M21M)61M(31M21M)61M	Mannose	89.29	1	N,0;	1	iI2-3-X15/B,
TR2	24999	115.77	947.722	947.719	4	3.0336	P43308	SSRB_HUMAN	Translocon-associated protein subunit beta	83	99	IAPASNVSHTVVLRPLK	I1dEN6GlcNAcK17dE	88	N2H9F0S0	01Y41Y41M(31M21M21M31G)61M(31M21M)61M	Mannose	315.15	1	N,4;	0
TR3	25100	115.87	907.207	907.206	4	1.38167	P43308	SSRB_HUMAN	Translocon-associated protein subunit beta	83	99	IAPASNVSHTVVLRPLK	I1dEN6GlcNAcK17dE	88	N2H8F0S0	01Y41Y41M(31M21M21M31G)61M(31M)61M	Mannose	148.35	1	N,1;	3	25AIII2,02AIII2,iI3-3-X35/C,
TR2	25027	115.9	907.207	907.206	4	0.574334	P43308	SSRB_HUMAN	Translocon-associated protein subunit beta	83	99	IAPASNVSHTVVLRPLK	I1dEN6GlcNAcK17dE	88	N2H8F0S0	01Y41Y41M(31M21M21M)61M(31M21M)61M	Mannose	259.19	1	N,2;	2	iI2-3-X25/C,iI2-3-X35/B,
TR3	25152	116.11	947.721	947.719	4	1.23034	P43308	SSRB_HUMAN	Translocon-associated protein subunit beta	83	99	IAPASNVSHTVVLRPLK	I1dEN6GlcNAcK17dE	88	N2H9F0S0	01Y41Y41M(31M21M21M)61M(31M21M)61M21M	Mannose	323.46	1	N,2;	1	iIII3-3-X12/B,
TR3	25152	116.11	947.721	947.719	4	1.23034	P43308	SSRB_HUMAN	Translocon-associated protein subunit beta	83	99	IAPASNVSHTVVLRPLK	I1dEN6GlcNAcK17dE	88	N2H9F0S0	01Y41Y41M(31M21M21M31G31G)61M(31M)61M	Mannose	308.16	1	N,2;	0
TR1	25116	116.17	981.233	981.222	5	10.7021	Q9BVK6	TMED9_HUMAN	Transmembrane emp24 domain-containing protein 9	108	128	FTFTSHTPGEHQICLHSNSTK	F1dEC14CamN18GlcNAcK21dE	125	N2H12F0S0	01Y41Y41M(31M21M21M31G31G21G)61M(31M21M)61M21M	Mannose	69.69	1	N,1;	25	iI4-5-B/Z,iII4-5-B/Z,iIII4-7-B/Z,iIII5-8-B/Z,14AI2,14AII2,14AIII2,CIII3,iI4-4-C/Y,iII4-4-C/Y,iIII4-6-C/Y,iIII5-7-C/Y,iIII6-8-C/Y,23AIII4,01AI2,01AII2,01AIII2,BI2,BII2,BIII2,BIII3,iI4-4-B/Y,C/Z,iII4-4-B/Y,C/Z,iIII4-6-B/Y,C/Z,iIII5-7-B/Y,C/Z,iIII6-8-B/Y,C/Z
TR1	25116	116.17	981.233	981.23	5	3.02392	Q9BVK6	TMED9_HUMAN	Transmembrane emp24 domain-containing protein 9	108	128	FTFTSHTPGEHQICLHSNSTK	F1dEC14CamN18GlcNAcK21dE	125	N4H5F1S2	01Y41Y41M(31M)61M(21Y(31F)41L32S)61Y41L32S	Complex	69.23	1	N,1;	0
TR3	25179	116.24	907.206	907.206	4	-0.434839	P43308	SSRB_HUMAN	Translocon-associated protein subunit beta	83	99	IAPASNVSHTVVLRPLK	I1dEN6GlcNAcK17dE	88	N2H8F0S0	01Y41Y41M(31M21M)61M(31M21M)61M21M	Mannose	272.85	1	N,2;	1	iI2-3-B/Y,C/Z,
TR1	25191	116.53	1100.15	1100.14	3	2.08571	P02786	TFR1_HUMAN	Transferrin receptor protein 1	720	732	KQNNGAFNETLFR	K1dEN8GlcNAc	727	N2H8F0S0	01Y41Y41M(31M21M21M)61M(31M21M)61M	Mannose	146.57	1	N,4;	1	iI2-3-X35/B,
TR1	25191	116.53	1100.15	1100.14	3	2.08571	P02786	TFR1_HUMAN	Transferrin receptor protein 1	720	732	KQNNGAFNETLFR	K1dEN8GlcNAc	727	N2H8F0S0	01Y41Y41M(31M21M)61M(31M21M)61M21M	Mannose	144.44	1	N,4;	2	45AI3,iI2-3-B/Y,C/Z,
TR1	25191	116.53	1100.15	1100.14	3	6.49244	Q8WVZ7	RN133_HUMAN	E3 ubiquitin-protein ligase RNF133	82	94	IQNACNPNTIFSR	I1dEN3GlcNAcC5Cam	84	N2H8F0S0	01Y41Y41M(31M21M21M)61M(31M21M)61M	Mannose	99.52	1	N,2;	1	iI2-3-X35/B,
TR1	25191	116.53	1100.15	1100.14	3	6.49244	Q8WVZ7	RN133_HUMAN	E3 ubiquitin-protein ligase RNF133	82	94	IQNACNPNTIFSR	I1dEN3GlcNAcC5Cam	84	N2H8F0S0	01Y41Y41M(31M21M)61M(31M21M)61M21M	Mannose	97.39	1	N,2;	2	45AI3,iI2-3-B/Y,C/Z,
TR1	25191	116.53	1100.49	1100.48	3	4.1006	Q9Y2C2	UST_HUMAN	Uronyl 2-sulfotransferase	155	167	NISTAEQPYLFTR	N1GlcNAc@dE	155	N2H8F0S0	01Y41Y41M(31M21M21M)61M(31M21M)61M	Mannose	97.32	1	N,0;	1	iI2-3-X35/B,
TR1	25191	116.53	1100.49	1100.48	3	4.1006	Q9Y2C2	UST_HUMAN	Uronyl 2-sulfotransferase	155	167	NISTAEQPYLFTR	N1GlcNAc@dE	155	N2H8F0S0	01Y41Y41M(31M21M)61M(31M21M)61M21M	Mannose	95.22	1	N,0;	2	45AI3,iI2-3-B/Y,C/Z,
TR1	25191	116.53	1100.15	1100.14	3	4.46632	Q13023	AKAP6_HUMAN	A-kinase anchor protein 6	358	370	NQQPVPCENATPK	N1dEC7CamN9GlcNAcK13dE	366	N2H8F0S0	01Y41Y41M(31M21M21M)61M(31M21M)61M	Mannose	93.79	1	N,1;	1	iI2-3-X35/B,
TR1	25191	116.53	1100.15	1100.15	3	0.229593	Q8IZC4-3	RTKN2_HUMAN	Isoform 3 of Rhotekin-2	151	163	TITDICFENVTIL	T1dEC6CamN9GlcNAc	159	N2H8F0S0	01Y41Y41M(31M21M21M)61M(31M21M)61M	Mannose	93.79	1	N,1;	1	iI2-3-X35/B,
TR1	25191	116.53	1100.15	1100.14	3	4.46632	Q13023	AKAP6_HUMAN	A-kinase anchor protein 6	358	370	NQQPVPCENATPK	N1dEC7CamN9GlcNAcK13dE	366	N2H8F0S0	01Y41Y41M(31M21M)61M(31M21M)61M21M	Mannose	91.66	1	N,1;	2	45AI3,iI2-3-B/Y,C/Z,
TR1	25191	116.53	1100.15	1100.15	3	0.229593	Q8IZC4-3	RTKN2_HUMAN	Isoform 3 of Rhotekin-2	151	163	TITDICFENVTIL	T1dEC6CamN9GlcNAc	159	N2H8F0S0	01Y41Y41M(31M21M)61M(31M21M)61M21M	Mannose	91.66	1	N,1;	2	45AI3,iI2-3-B/Y,C/Z,
TR1	25191	116.53	1100.15	1100.15	3	-6.52583	Q16820	MEP1B_HUMAN	Meprin A subunit beta	214	227	TAFQNGTEPTIVTR	T1dEN5GlcNAc	218	N2H8F0S0	01Y41Y41M(31M21M)61M(31M21M)61M21M	Mannose	91.52	2	N,1;	2	45AI3,iI2-3-B/Y,C/Z,
TR1	25191	116.53	1100.15	1100.15	3	-6.52583	Q16820	MEP1B_HUMAN	Meprin A subunit beta	214	227	TAFQNGTEPTIVTR	T1dEN5GlcNAc	218	N2H8F0S0	01Y41Y41M(31M21M21M)61M(31M21M)61M	Mannose	91.52	2	N,1;	1	iI2-3-X35/B,
TR1	25191	116.53	1100.49	1100.47	3	11.7292	Q5TH74	STPG1_HUMAN	O(6)-methylguanine-induced apoptosis 2	283	296	HFISSASFVSNTSR	H1dEN11GlcNAc	293	N2H8F0S0	01Y41Y41M(31M21M)61M(31M21M)61M21M	Mannose	90.81	2	N,0;	2	45AI3,iI2-3-B/Y,C/Z,
TR1	25191	116.53	1100.49	1100.47	3	11.7292	Q5TH74	STPG1_HUMAN	O(6)-methylguanine-induced apoptosis 2	283	296	HFISSASFVSNTSR	H1dEN11GlcNAc	293	N2H8F0S0	01Y41Y41M(31M21M21M)61M(31M21M)61M	Mannose	90.81	2	N,0;	1	iI2-3-X35/B,
TR1	25191	116.53	1100.49	1100.47	3	11.7292	Q5TH74	STPG1_HUMAN	O(6)-methylguanine-induced apoptosis 2	283	296	HFISSASFVSNTSR	H1dEN11GlcNAc	293	N2H8F0S0	01Y41Y41M(31M21M21M31G)61M(31M)61M	Mannose	86.63	1	N,0;	2	25AIII2,iIII3-3-X12/B,
TR1	25191	116.53	1100.15	1100.15	3	-6.52583	Q16820	MEP1B_HUMAN	Meprin A subunit beta	214	227	TAFQNGTEPTIVTR	T1dEN5GlcNAc	218	N2H8F0S0	01Y41Y41M(31M21M21M31G)61M(31M)61M	Mannose	85.19	1	N,1;	2	25AIII2,iIII3-3-X12/B,
TR1	25191	116.53	1100.49	1100.49	3	-0.272941	P10070	GLI2_HUMAN	Zinc finger protein GLI2	251	264	TSPNSLVAYINNSR	T1dEN11GlcNAc	261	N2H8F0S0	01Y41Y41M(31M21M)61M(31M21M)61M21M	Mannose	84.89	2	N,0;	2	45AI3,iI2-3-B/Y,C/Z,
TR1	25191	116.53	1100.49	1100.49	3	-0.272941	P10070	GLI2_HUMAN	Zinc finger protein GLI2	251	264	TSPNSLVAYINNSR	T1dEN11GlcNAc	261	N2H8F0S0	01Y41Y41M(31M21M21M)61M(31M21M)61M	Mannose	84.89	2	N,0;	1	iI2-3-X35/B,
TR1	25191	116.53	1100.82	1100.81	3	2.91872	O75891	AL1L1_HUMAN	Cytosolic 10-formyltetrahydrofolate dehydrogenase	827	841	ANATEFGLASGVFTR	A1dEN2GlcNAc	828	N2H8F0S0	01Y41Y41M(31M21M21M)61M(31M21M)61M	Mannose	82.19	1	N,0;	1	iI2-3-X35/B,
TR1	25191	116.53	1100.82	1100.81	3	2.91872	O75891	AL1L1_HUMAN	Cytosolic 10-formyltetrahydrofolate dehydrogenase	827	841	ANATEFGLASGVFTR	A1dEN2GlcNAc	828	N2H8F0S0	01Y41Y41M(31M21M)61M(31M21M)61M21M	Mannose	80.14	1	N,0;	2	45AI3,iI2-3-B/Y,C/Z,
TR1	25191	116.53	1100.82	1100.82	3	-2.71619	Q8WUM4	PDC6I_HUMAN	Programmed cell death 6-interacting protein	687	698	FQNKCSDIVFAR	F1dEN3GlcNAcK4dEC5Cam	689	N2H8F0S0	01Y41Y41M(31M21M21M)61M(31M21M)61M	Mannose	78.93	1	N,2;	1	iI2-3-X35/B,
TR1	25191	116.53	1100.49	1100.49	3	-0.272941	P10070	GLI2_HUMAN	Zinc finger protein GLI2	251	264	TSPNSLVAYINNSR	T1dEN11GlcNAc	261	N2H8F0S0	01Y41Y41M(31M21M21M31G)61M(31M)61M	Mannose	78.67	1	N,0;	2	25AIII2,iIII3-3-X12/B,
TR1	25191	116.53	1100.82	1100.82	3	-2.71619	Q8WUM4	PDC6I_HUMAN	Programmed cell death 6-interacting protein	687	698	FQNKCSDIVFAR	F1dEN3GlcNAcK4dEC5Cam	689	N2H8F0S0	01Y41Y41M(31M21M)61M(31M21M)61M21M	Mannose	76.88	1	N,2;	2	45AI3,iI2-3-B/Y,C/Z,
TR1	25191	116.53	1100.82	1100.81	3	2.91872	P49005	DPOD2_HUMAN	DNA polymerase delta subunit 2	341	354	FLGTSGQNVSDIFR	F1dEN8GlcNAc	348	N2H8F0S0	01Y41Y41M(31M21M21M)61M(31M21M)61M	Mannose	76.62	1	N,1;	1	iI2-3-X35/B,
TR1	25191	116.53	1100.82	1100.81	3	2.91872	P49005	DPOD2_HUMAN	DNA polymerase delta subunit 2	341	354	FLGTSGQNVSDIFR	F1dEN8GlcNAc	348	N2H8F0S0	01Y41Y41M(31M21M)61M(31M21M)61M21M	Mannose	74.57	1	N,1;	2	45AI3,iI2-3-B/Y,C/Z,
TR1	25191	116.53	1100.82	1100.81	3	9.53117	O14782	KIF3C_HUMAN	Kinesin-like protein KIF3C	190	202	EIEHVMNLGNQTR	E1dEN10GlcNAc	199	N2H8F0S0	01Y41Y41M(31M21M21M31G)61M(31M)61M	Mannose	64.62	1	N,1;	2	25AIII2,iIII3-3-X12/B,
TR1	25191	116.53	1100.82	1100.81	3	9.53117	O14782	KIF3C_HUMAN	Kinesin-like protein KIF3C	190	202	EIEHVMNLGNQTR	E1dEN10GlcNAc	199	N2H8F0S0	01Y41Y41M(31M21M21M)61M(31M21M)61M	Mannose	58.76	1	N,1;	1	iI2-3-X35/B,
TR1	25192	116.54	920.426	920.415	3	11.9904	Q5MJ70	SPDYA_HUMAN	Speedy protein A	20	29	SGSNRSHQPK	S1dEN4GlcNAcK10dE	23	N2H7F0S0	01Y41Y41M(31M21M)61M(31M21M)61M	Mannose	40.14	1	N,0;	1	iI2-3-B/Y,C/Z,
TR1	25192	116.54	920.074	920.085	3	-11.6806	Q5U623	MCAF2_HUMAN	Activating transcription factor 7-interacting protein 2	25	33	QVEMLNKSR	Q1dEN6GlcNAcK7dE	30	N2H7F0S0	01Y41Y41M(31M)61M(31M21M)61M21M	Mannose	39.77	1	N,0;	5	iI2-3-X15/C,iI2-3-X35/B,iI2-3-X45/C,45AI3,iI2-3-B/Y,C/Z,
TR1	25192	116.54	920.074	920.081	3	-7.62448	O15297	PPM1D_HUMAN	Protein phosphatase 1D	228	238	IEGLGGSVMNK	I1dEN10GlcNAcK11dE	237	N2H7F0S0	01Y41Y41M(31M)61M(31M21M)61M21M	Mannose	39.1	1	N,0;	5	iI2-3-X15/C,iI2-3-X35/B,iI2-3-X45/C,45AI3,iI2-3-B/Y,C/Z,
TR1	25192	116.54	920.426	920.411	3	16.005	O15305	PMM2_HUMAN	Phosphomannomutase 2	124	134	NGMLNVSPIGR	N1dEN5GlcNAc	128	N2H7F0S0	01Y41Y41M(31M21M)61M(31M21M)61M	Mannose	37.02	1	N,1;	1	iI2-3-B/Y,C/Z,
TR1	25192	116.54	920.426	920.415	3	11.9904	Q5MJ70	SPDYA_HUMAN	Speedy protein A	20	29	SGSNRSHQPK	S1dEN4GlcNAcK10dE	23	N2H7F0S0	01Y41Y41M(31M)61M(31M21M)61M21M	Mannose	37.01	2	N,0;	5	iI2-3-X15/C,iI2-3-X35/B,iI2-3-X45/C,45AI3,iI2-3-B/Y,C/Z,
TR1	25192	116.54	920.426	920.415	3	11.9904	Q5MJ70	SPDYA_HUMAN	Speedy protein A	20	29	SGSNRSHQPK	S1dEN4GlcNAcK10dE	23	N2H7F0S0	01Y41Y41M(31M21M21M)61M(31M)61M	Mannose	37.01	2	N,0;	3	iI2-3-X25/C,iI2-3-X35/B,iI2-3-B/Y,C/Z,iIII2-3-B/Y,C/Z,
TR1	25200	116.58	921.083	921.074	3	10.0178	Q9Y227	ENTP4_HUMAN	Ectonucleoside triphosphate diphosphohydrolase 4	397	405	ETIQPFMNK	E1dEN8GlcNAcK9dE	404	N2H7F0S0	01Y41Y41M(31M21M)61M(31M21M)61M	Mannose	57.42	1	N,1;	1	iI2-3-B/Y,C/Z,
TR1	25201	116.58	973.765	973.766	3	-1.58504	Q16827	PTPRO_HUMAN	Receptor-type tyrosine-protein phosphatase O	153	161	VNISYWEGK	V1dEN2GlcNAcK9dE	154	N2H8F0S0	01Y41Y41M(31M21M)61M(31M21M)61M21M	Mannose	54.96	1	N,0;	2	iI2-3-B/Y,C/Z,iI3-4-X45/C,
TR1	25200	116.58	921.083	921.074	3	10.0178	Q9Y227	ENTP4_HUMAN	Ectonucleoside triphosphate diphosphohydrolase 4	397	405	ETIQPFMNK	E1dEN8GlcNAcK9dE	404	N2H7F0S0	01Y41Y41M(31M)61M(31M21M)61M21M	Mannose	53.65	1	N,1;	9	iI2-3-X15/C,iI2-3-X35/B,iI2-3-X45/C,iI2-4-X25/C,45AI3,iI2-3-X15/B,iI2-3-X01/C,iI2-3-X35/C,iI2-3-B/Y,C/Z,
TR1	25201	116.58	973.765	973.766	3	-1.58504	Q16827	PTPRO_HUMAN	Receptor-type tyrosine-protein phosphatase O	153	161	VNISYWEGK	V1dEN2GlcNAcK9dE	154	N2H8F0S0	01Y41Y41M(31M21M21M)61M(31M21M)61M	Mannose	53.11	1	N,0;	3	iI2-3-X25/C,iI2-3-X35/B,iI2-3-X45/C,
TR1	25201	116.58	973.765	973.765	3	0.0149348	Q9H061	T126A_HUMAN	Transmembrane protein 126A	10	19	ENITIVDISR	E1dEN2GlcNAc	11	N2H8F0S0	01Y41Y41M(31M21M)61M(31M21M)61M21M	Mannose	52.56	1	N,1;	2	iI2-3-B/Y,C/Z,iI3-4-X45/C,
TR1	25201	116.58	973.765	973.766	3	-1.5645	Q5JRV8	T255A_HUMAN	Transmembrane protein 255A	155	164	VMRNLTQAAR	V1dEN4GlcNAc	158	N2H8F0S0	01Y41Y41M(31M21M)61M(31M21M)61M21M	Mannose	51.31	1	N,0;	2	iI2-3-B/Y,C/Z,iI3-4-X45/C,
TR1	25201	116.58	973.765	973.765	3	0.0149348	Q9H061	T126A_HUMAN	Transmembrane protein 126A	10	19	ENITIVDISR	E1dEN2GlcNAc	11	N2H8F0S0	01Y41Y41M(31M21M21M)61M(31M21M)61M	Mannose	50.71	1	N,1;	3	iI2-3-X25/C,iI2-3-X35/B,iI2-3-X45/C,
TR1	25200	116.58	921.083	921.08	3	3.3668	Q9Y2M2	SSUH2_HUMAN	Protein SSUH2 homolog	211	219	GNKTCATCK	G1dEN2GlcNAcK3dEC5CamC8CamK9dE	212	N2H7F0S0	01Y41Y41M(31M21M21M)61M(31M)61M	Mannose	49.51	1	N,1;	3	iI2-3-X25/C,iIII3-3-X12/B,iI2-3-B/Y,C/Z,iIII2-3-B/Y,C/Z,
TR1	25201	116.58	973.765	973.766	3	-1.5645	Q5JRV8	T255A_HUMAN	Transmembrane protein 255A	155	164	VMRNLTQAAR	V1dEN4GlcNAc	158	N2H8F0S0	01Y41Y41M(31M21M21M)61M(31M21M)61M	Mannose	49.5	1	N,0;	3	iI2-3-X25/C,iI2-3-X35/B,iI2-3-X45/C,
TR1	25201	116.58	973.765	973.769	3	-3.8176	Q03169	TNAP2_HUMAN	Tumor necrosis factor alpha-induced protein 2	620	629	GNLSNSEVKR	G1dEN2GlcNAcK9dE	621	N2H8F0S0	01Y41Y41M(31M21M21M)61M(31M21M)61M	Mannose	48.69	1	N,0;	3	iI2-3-X25/C,iI2-3-X35/B,iI2-3-X45/C,
TR1	25201	116.58	973.765	973.76	3	4.80462	Q96PY0	K1908_HUMAN	Putative uncharacterized protein PSMG3-AS1	83	93	AQAGSNQSRGK	A1dEN6GlcNAcK11dE	88	N2H8F0S0	01Y41Y41M(31M21M)61M(31M21M)61M21M	Mannose	48.51	1	N,0;	2	iI2-3-B/Y,C/Z,iI3-4-X45/C,
TR1	25200	116.58	921.083	921.08	3	3.3668	Q9Y2M2	SSUH2_HUMAN	Protein SSUH2 homolog	211	219	GNKTCATCK	G1dEN2GlcNAcK3dEC5CamC8CamK9dE	212	N2H7F0S0	01Y41Y41M(31M21M)61M(31M21M)61M	Mannose	47.64	1	N,1;	1	iI2-3-B/Y,C/Z,
TR1	25201	116.58	973.765	973.766	3	-1.5645	Q86X10	RLGPB_HUMAN	Ral GTPase-activating protein subunit beta	1436	1444	QTVINICRR	Q1dEN5GlcNAcC7Cam	1440	N2H8F0S0	01Y41Y41M(31M21M21M)61M(31M21M)61M	Mannose	47.64	1	N,0;	3	iI2-3-X25/C,iI2-3-X35/B,iI2-3-X45/C,
TR1	25200	116.58	921.083	921.083	3	0.541855	Q96P26	5NT1B_HUMAN	Cytosolic 5'-nucleotidase 1B	43	52	RAVNPNHSLR	R1dEN6GlcNAc	48	N2H7F0S0	01Y41Y41M(31M21M21M)61M(31M)61M	Mannose	47.43	1	N,1;	3	iI2-3-X25/C,iIII3-3-X12/B,iI2-3-B/Y,C/Z,iIII2-3-B/Y,C/Z,
TR1	25201	116.58	973.765	973.766	3	-1.5645	O15360	FANCA_HUMAN	Fanconi anemia group A protein	1137	1146	GLLNACLRSR	G1dEN4GlcNAcC6Cam	1140	N2H8F0S0	01Y41Y41M(31M21M)61M(31M21M)61M21M	Mannose	47.05	1	N,2;	2	iI2-3-B/Y,C/Z,iI3-4-X45/C,
TR1	25201	116.58	973.765	973.76	3	4.80462	Q96PY0	K1908_HUMAN	Putative uncharacterized protein PSMG3-AS1	83	93	AQAGSNQSRGK	A1dEN6GlcNAcK11dE	88	N2H8F0S0	01Y41Y41M(31M21M21M)61M(31M21M)61M	Mannose	46.67	1	N,0;	3	iI2-3-X25/C,iI2-3-X35/B,iI2-3-X45/C,
TR1	25200	116.58	921.083	921.083	3	0.541855	Q96P26	5NT1B_HUMAN	Cytosolic 5'-nucleotidase 1B	43	52	RAVNPNHSLR	R1dEN6GlcNAc	48	N2H7F0S0	01Y41Y41M(31M21M)61M(31M21M)61M	Mannose	45.56	1	N,1;	1	iI2-3-B/Y,C/Z,
TR1	25201	116.58	974.438	974.426	3	11.8152	Q8IY92	SLX4_HUMAN	Structure-specific endonuclease subunit SLX4	302	311	NLSAMNVTRR	N1dEN6GlcNAc	307	N2H8F0S0	01Y41Y41M(31M21M21M31G)61M(31M)61M	Mannose	45.54	1	N,0;	1	iIII3-3-X12/B,
TR1	25201	116.58	973.765	973.761	3	3.84852	Q9UGU0	TCF20_HUMAN	Transcription factor 20	1515	1524	ENDTVTISPK	E1dEN2GlcNAcK10dE	1516	N2H8F0S0	01Y41Y41M(31M21M)61M(31M21M)61M21M	Mannose	45.24	1	N,1;	2	iI2-3-B/Y,C/Z,iI3-4-X45/C,
TR1	25201	116.58	973.765	973.766	3	-1.5645	O15360	FANCA_HUMAN	Fanconi anemia group A protein	1137	1146	GLLNACLRSR	G1dEN4GlcNAcC6Cam	1140	N2H8F0S0	01Y41Y41M(31M21M21M)61M(31M21M)61M	Mannose	45.24	1	N,2;	3	iI2-3-X25/C,iI2-3-X35/B,iI2-3-X45/C,
TR1	25201	116.58	974.438	974.426	3	11.8152	Q8IY92	SLX4_HUMAN	Structure-specific endonuclease subunit SLX4	302	311	NLSAMNVTRR	N1dEN6GlcNAc	307	N2H8F0S0	01Y41Y41M(31M21M21M)61M(31M21M)61M	Mannose	43.77	1	N,0;	3	iI2-3-X25/C,iI2-3-X35/B,iI2-3-X45/C,
TR1	25201	116.58	973.765	973.761	3	3.84852	Q9UGU0	TCF20_HUMAN	Transcription factor 20	1515	1524	ENDTVTISPK	E1dEN2GlcNAcK10dE	1516	N2H8F0S0	01Y41Y41M(31M21M21M)61M(31M21M)61M	Mannose	43.45	1	N,1;	3	iI2-3-X25/C,iI2-3-X35/B,iI2-3-X45/C,
TR1	25201	116.58	974.438	974.429	3	9.31835	O15305	PMM2_HUMAN	Phosphomannomutase 2	124	134	NGMLNVSPIGR	N1dEN5GlcNAc	128	N2H8F0S0	01Y41Y41M(31M21M21M31G)61M(31M)61M	Mannose	39.38	1	N,1;	1	iIII3-3-X12/B,
TR1	25201	116.58	974.438	974.437	3	0.94626	Q7KZI7	MARK2_HUMAN	Serine/threonine-protein kinase MARK2	87	96	TQLNSSSLQK	T1dEN4GlcNAcK10dE	90	N2H8F0S0	01Y41Y41M(31M21M21M)61M(31M21M)61M	Mannose	39.03	1	N,0;	3	iI2-3-X25/C,iI2-3-X35/B,iI2-3-X45/C,
TR1	25201	116.58	974.438	974.434	3	3.23477	Q15223	NECT1_HUMAN	Nectin-1	200	210	NPNGTVTVISR	N1dEN3GlcNAc	202	N2H8F0S0	01Y41Y41M(31M21M21M)61M(31M21M)61M	Mannose	38.71	1	N,1;	3	iI2-3-X25/C,iI2-3-X35/B,iI2-3-X45/C,
TR1	25201	116.58	974.438	974.429	3	9.31835	O15305	PMM2_HUMAN	Phosphomannomutase 2	124	134	NGMLNVSPIGR	N1dEN5GlcNAc	128	N2H8F0S0	01Y41Y41M(31M21M21M)61M(31M21M)61M	Mannose	37.61	1	N,1;	3	iI2-3-X25/C,iI2-3-X35/B,iI2-3-X45/C,
TR1	25203	116.59	1211.2	1211.19	3	5.36009	Q8IYU2	HACE1_HUMAN	E3 ubiquitin-protein ligase HACE1	333	350	IGPSSPSNGIDMGYNGNK	I1dEN17GlcNAcK18dE	349	N2H8F0S0	01Y41Y41M(31M21M21M31G)61M(31M)61M	Mannose	107.95	1	N,1;	3	25AIII2,iIII3-3-X12/B,iI2-3-X25/C,
TR1	25229	116.72	1379.62	1379.61	2	9.58208	Q5VTT2	CI135_HUMAN	Protein C9orf135	186	195	SQFTDLNGSK	S1dEN7GlcNAcK10dE	192	N2H7F0S0	01Y41Y41M(31M21M)61M(31M21M)61M	Mannose	164.24	1	N,0;	1	iI2-3-B/Y,C/Z,
TR1	25229	116.72	1379.62	1379.61	2	9.58208	Q5VTT2	CI135_HUMAN	Protein C9orf135	186	195	SQFTDLNGSK	S1dEN7GlcNAcK10dE	192	N2H7F0S0	01Y41Y41M(31M)61M(31M21M)61M21M	Mannose	143.81	1	N,0;	1	iI2-3-B/Y,C/Z,
TR1	25229	116.72	1379.11	1379.12	2	-6.34697	Q8NBL1	PGLT1_HUMAN	Protein O-glucosyltransferase 1	369	377	FLSYNVTRR	F1dEN5GlcNAc	373	N2H7F0S0	01Y41Y41M(31M21M21M)61M(31M)61M	Mannose	108.19	1	N,0;	2	iIII3-3-X12/B,iI2-3-B/Y,C/Z,iIII2-3-B/Y,C/Z,
TR1	25229	116.72	1379.11	1379.12	2	-7.29974	Q03169	TNAP2_HUMAN	Tumor necrosis factor alpha-induced protein 2	620	629	GNLSNSEVKR	G1dEN2GlcNAcK9dE	621	N2H7F0S0	01Y41Y41M(31M21M21M)61M(31M)61M	Mannose	104.64	1	N,1;	2	iIII3-3-X12/B,iI2-3-B/Y,C/Z,iIII2-3-B/Y,C/Z,
TR1	25229	116.72	1379.11	1379.12	2	-6.34697	Q8NBL1	PGLT1_HUMAN	Protein O-glucosyltransferase 1	369	377	FLSYNVTRR	F1dEN5GlcNAc	373	N2H7F0S0	01Y41Y41M(31M21M)61M(31M21M)61M	Mannose	103.36	1	N,0;	1	iI2-3-B/Y,C/Z,
TR1	25229	116.72	1379.11	1379.12	2	-7.29974	Q03169	TNAP2_HUMAN	Tumor necrosis factor alpha-induced protein 2	620	629	GNLSNSEVKR	G1dEN2GlcNAcK9dE	621	N2H7F0S0	01Y41Y41M(31M21M)61M(31M21M)61M	Mannose	99.81	1	N,1;	1	iI2-3-B/Y,C/Z,
TR3	25318	116.88	1372.18	1372.18	2	3.44818	P20645	MPRD_HUMAN	Cation-dependent mannose-6-phosphate receptor	52	58	LKPLFNK	L1dEK2dEN6GlcNAcK7dE	57	N2H8F0S0	01Y41Y41M(31M21M21M)61M(31M21M)61M	Mannose	122.03	1	N,2;	0
TR1	25265	116.9	866.065	866.058	3	8.522	Q5VTT2	CI135_HUMAN	Protein C9orf135	186	195	SQFTDLNGSK	S1dEN7GlcNAcK10dE	192	N2H6F0S0	01Y41Y41M(31M21M)61M(31M)61M	Mannose	38.04	2	N,1;	4	iI2-3-A03/Z,iI2-3-A34/Y,iI2-3-A03/Z,iI2-3-B/Y,C/Z,
TR1	25265	116.9	867.4	867.398	3	2.38482	O75762	TRPA1_HUMAN	Transient receptor potential cation channel subfamily A member 1	611	620	IFSHNSPGNK	I1dEN9GlcNAcK10dE	619	N2H6F0S0	01Y41Y41M(31M)61M(31M21M)61M	Mannose	36.29	2	N,1;	5	iI2-3-X15/C,iI2-3-X35/B,iI2-3-X45/C,iI2-3-X35/C,iI2-3-B/Y,C/Z,
TR1	25265	116.9	867.4	867.398	3	2.38482	O75762	TRPA1_HUMAN	Transient receptor potential cation channel subfamily A member 1	611	620	IFSHNSPGNK	I1dEN9GlcNAcK10dE	619	N2H6F0S0	01Y41Y41M(31M21M)61M(31M)61M	Mannose	36.29	2	N,1;	4	iI2-3-A03/Z,iI2-3-A34/Y,iI2-3-A03/Z,iI2-3-B/Y,C/Z,
TR1	25282	116.98	920.081	920.079	3	2.75513	P48729	KC1A_HUMAN	Casein kinase I isoform alpha	177	186	EDKNLTGTAR	E1dEK3dEN4GlcNAc	180	N2H7F0S0	01Y41Y41M(31M21M)61M(31M21M)61M	Mannose	97.85	1	N,1;	1	iI2-3-B/Y,C/Z,
TR1	25282	116.98	920.081	920.075	3	6.59069	Q5VTT2	CI135_HUMAN	Protein C9orf135	186	195	SQFTDLNGSK	S1dEN7GlcNAcK10dE	192	N2H7F0S0	01Y41Y41M(31M21M21M)61M(31M)61M	Mannose	93.64	1	N,0;	3	iI2-3-X25/C,iIII3-3-X12/B,iI2-3-B/Y,C/Z,iIII2-3-B/Y,C/Z,
TR1	25282	116.98	920.081	920.079	3	2.75513	P48729	KC1A_HUMAN	Casein kinase I isoform alpha	177	186	EDKNLTGTAR	E1dEK3dEN4GlcNAc	180	N2H7F0S0	01Y41Y41M(31M)61M(31M21M)61M21M	Mannose	93.52	2	N,1;	5	iI2-3-X15/C,iI2-3-X35/B,iI2-3-X45/C,iI2-4-X25/C,iI2-3-B/Y,C/Z,
TR1	25282	116.98	920.081	920.079	3	2.75513	P48729	KC1A_HUMAN	Casein kinase I isoform alpha	177	186	EDKNLTGTAR	E1dEK3dEN4GlcNAc	180	N2H7F0S0	01Y41Y41M(31M21M21M)61M(31M)61M	Mannose	93.52	2	N,1;	3	iI2-3-X25/C,iIII3-3-X12/B,iI2-3-B/Y,C/Z,iIII2-3-B/Y,C/Z,
TR1	25282	116.98	920.081	920.074	3	7.82538	Q96JY0	MAEL_HUMAN	Protein maelstrom homolog	381	391	ISGQNSSVRGR	I1dEN5GlcNAc	385	N2H7F0S0	01Y41Y41M(31M21M)61M(31M21M)61M	Mannose	93.28	1	N,0;	1	iI2-3-B/Y,C/Z,
TR1	25282	116.98	920.081	920.075	3	7.56779	Q8NA42	ZN383_HUMAN	Zinc finger protein 383	434	442	CSNLTRHLR	C1dE@CamN3GlcNAc	436	N2H7F0S0	01Y41Y41M(31M21M)61M(31M21M)61M	Mannose	91.58	1	N,0;	1	iI2-3-B/Y,C/Z,
TR1	25282	116.98	920.081	920.074	3	7.82538	Q96JY0	MAEL_HUMAN	Protein maelstrom homolog	381	391	ISGQNSSVRGR	I1dEN5GlcNAc	385	N2H7F0S0	01Y41Y41M(31M21M21M)61M(31M)61M	Mannose	91.14	1	N,0;	3	iI2-3-X25/C,iIII3-3-X12/B,iI2-3-B/Y,C/Z,iIII2-3-B/Y,C/Z,
TR1	25282	116.98	920.081	920.075	3	7.56779	Q8NA42	ZN383_HUMAN	Zinc finger protein 383	434	442	CSNLTRHLR	C1dE@CamN3GlcNAc	436	N2H7F0S0	01Y41Y41M(31M21M21M)61M(31M)61M	Mannose	89.42	1	N,0;	3	iI2-3-X25/C,iIII3-3-X12/B,iI2-3-B/Y,C/Z,iIII2-3-B/Y,C/Z,
TR1	25282	116.98	919.747	919.749	3	-1.81646	Q86X10	RLGPB_HUMAN	Ral GTPase-activating protein subunit beta	1436	1444	QTVINICRR	Q1dEN5GlcNAcC7Cam	1440	N2H7F0S0	01Y41Y41M(31M21M21M)61M(31M)61M	Mannose	89.42	1	N,0;	3	iI2-3-X25/C,iIII3-3-X12/B,iI2-3-B/Y,C/Z,iIII2-3-B/Y,C/Z,
TR1	25282	116.98	919.747	919.744	3	3.69159	O00533	NCHL1_HUMAN	Neural cell adhesion molecule L1-like protein	297	305	IENVSYQDK	I1dEN3GlcNAcK9dE	299	N2H7F0S0	01Y41Y41M(31M21M21M)61M(31M)61M	Mannose	78.88	1	N,0;	3	iI2-3-X25/C,iIII3-3-X12/B,iI2-3-B/Y,C/Z,iIII2-3-B/Y,C/Z,
TR1	25282	116.98	919.747	919.749	3	-1.81646	Q86X10	RLGPB_HUMAN	Ral GTPase-activating protein subunit beta	1436	1444	QTVINICRR	Q1dEN5GlcNAcC7Cam	1440	N2H7F0S0	01Y41Y41M(31M21M)61M(31M21M)61M	Mannose	78.78	1	N,0;	1	iI2-3-B/Y,C/Z,
TR1	25282	116.98	920.081	920.083	3	-1.30104	Q6NXP6	NXRD1_HUMAN	NADP-dependent oxidoreductase domain-containing protein 1	53	62	ASLNKNQSSR	A1dEK5dEN6GlcNAc	58	N2H7F0S0	01Y41Y41M(31M21M21M)61M(31M)61M	Mannose	76.43	1	N,0;	3	iI2-3-X25/C,iIII3-3-X12/B,iI2-3-B/Y,C/Z,iIII2-3-B/Y,C/Z,
TR1	25282	116.98	919.747	919.747	3	-0.145352	Q9H061	T126A_HUMAN	Transmembrane protein 126A	10	19	ENITIVDISR	E1dEN2GlcNAc	11	N2H7F0S0	01Y41Y41M(31M21M21M)61M(31M)61M	Mannose	72.4	1	N,1;	3	iI2-3-X25/C,iIII3-3-X12/B,iI2-3-B/Y,C/Z,iIII2-3-B/Y,C/Z,
TR1	25282	116.98	919.747	919.744	3	3.69159	O00533	NCHL1_HUMAN	Neural cell adhesion molecule L1-like protein	297	305	IENVSYQDK	I1dEN3GlcNAcK9dE	299	N2H7F0S0	01Y41Y41M(31M21M)61M(31M21M)61M	Mannose	70.59	1	N,0;	1	iI2-3-B/Y,C/Z,
TR1	25282	116.98	920.081	920.085	3	-3.98557	Q5U623	MCAF2_HUMAN	Activating transcription factor 7-interacting protein 2	25	33	QVEMLNKSR	Q1dEN6GlcNAcK7dE	30	N2H7F0S0	01Y41Y41M(31M21M21M)61M(31M)61M	Mannose	70.44	1	N,0;	3	iI2-3-X25/C,iIII3-3-X12/B,iI2-3-B/Y,C/Z,iIII2-3-B/Y,C/Z,
TR1	25282	116.98	920.081	920.083	3	-1.30104	Q6NXP6	NXRD1_HUMAN	NADP-dependent oxidoreductase domain-containing protein 1	53	62	ASLNKNQSSR	A1dEK5dEN6GlcNAc	58	N2H7F0S0	01Y41Y41M(31M21M)61M(31M21M)61M	Mannose	68.14	1	N,0;	1	iI2-3-B/Y,C/Z,
TR1	25282	116.98	919.747	919.751	3	-4.20297	Q9UDY2	ZO2_HUMAN	Tight junction protein ZO-2	828	837	LNPTSNKSSR	L1dEN6GlcNAcK7dE	833	N2H7F0S0	01Y41Y41M(31M21M21M)61M(31M)61M	Mannose	66.1	1	N,0;	3	iI2-3-X25/C,iIII3-3-X12/B,iI2-3-B/Y,C/Z,iIII2-3-B/Y,C/Z,
TR1	25282	116.98	920.081	920.085	3	-3.98557	Q5U623	MCAF2_HUMAN	Activating transcription factor 7-interacting protein 2	25	33	QVEMLNKSR	Q1dEN6GlcNAcK7dE	30	N2H7F0S0	01Y41Y41M(31M21M)61M(31M21M)61M	Mannose	62.3	1	N,0;	1	iI2-3-B/Y,C/Z,
TR1	25282	116.98	919.747	919.751	3	-4.20297	Q5T3I0	GPTC4_HUMAN	G patch domain-containing protein 4	281	289	EQTNQSLRK	E1dEN4GlcNAcK9dE	284	N2H7F0S0	01Y41Y41M(31M21M21M)61M(31M)61M	Mannose	62.23	1	N,0;	3	iI2-3-X25/C,iIII3-3-X12/B,iI2-3-B/Y,C/Z,iIII2-3-B/Y,C/Z,
TR1	25282	116.98	919.747	919.751	3	-4.20297	Q5JVX7	CA141_HUMAN	Uncharacterized protein C1orf141	301	309	TNKQTLENR	T1dEK3dEN8GlcNAc	308	N2H7F0S0	01Y41Y41M(31M21M21M)61M(31M)61M	Mannose	62.23	1	N,1;	3	iI2-3-X25/C,iIII3-3-X12/B,iI2-3-B/Y,C/Z,iIII2-3-B/Y,C/Z,
TR1	25282	116.98	919.747	919.751	3	-4.20297	P49674	KC1E_HUMAN	Casein kinase I isoform epsilon	169	178	ENKNLTGTAR	E1dEK3dEN4GlcNAc	172	N2H7F0S0	01Y41Y41M(31M21M21M)61M(31M)61M	Mannose	62.07	1	N,0;	3	iI2-3-X25/C,iIII3-3-X12/B,iI2-3-B/Y,C/Z,iIII2-3-B/Y,C/Z,
TR1	25282	116.98	919.747	919.751	3	-4.20297	Q9UDY2	ZO2_HUMAN	Tight junction protein ZO-2	828	837	LNPTSNKSSR	L1dEN6GlcNAcK7dE	833	N2H7F0S0	01Y41Y41M(31M21M)61M(31M21M)61M	Mannose	58.05	1	N,0;	1	iI2-3-B/Y,C/Z,
TR1	25282	116.98	919.747	919.751	3	-4.20297	Q5T3I0	GPTC4_HUMAN	G patch domain-containing protein 4	281	289	EQTNQSLRK	E1dEN4GlcNAcK9dE	284	N2H7F0S0	01Y41Y41M(31M21M)61M(31M21M)61M	Mannose	54.18	1	N,0;	1	iI2-3-B/Y,C/Z,
TR1	25282	116.98	919.747	919.751	3	-4.20297	Q5JVX7	CA141_HUMAN	Uncharacterized protein C1orf141	301	309	TNKQTLENR	T1dEK3dEN8GlcNAc	308	N2H7F0S0	01Y41Y41M(31M21M)61M(31M21M)61M	Mannose	54.18	1	N,1;	1	iI2-3-B/Y,C/Z,
TR1	25282	116.98	919.747	919.751	3	-4.20297	P49674	KC1E_HUMAN	Casein kinase I isoform epsilon	169	178	ENKNLTGTAR	E1dEK3dEN4GlcNAc	172	N2H7F0S0	01Y41Y41M(31M21M)61M(31M21M)61M	Mannose	54.02	1	N,0;	1	iI2-3-B/Y,C/Z,
TR1	25283	116.99	1210.53	1210.52	3	9.77269	P49792	RBP2_HUMAN	E3 SUMO-protein ligase RanBP2	1105	1121	NVSGISFTENMGSSQQK	N1GlcNAc@dEK17dE	1105	N2H8F0S0	01Y41Y41M(31M21M)61M(31M21M)61M21M	Mannose	165	2	N,0;	2	45AI3,iI2-3-B/Y,C/Z,
TR1	25283	116.99	1210.53	1210.52	3	9.77269	P49792	RBP2_HUMAN	E3 SUMO-protein ligase RanBP2	1105	1121	NVSGISFTENMGSSQQK	N1GlcNAc@dEK17dE	1105	N2H8F0S0	01Y41Y41M(31M21M21M)61M(31M21M)61M	Mannose	165	2	N,0;	0
TR1	25283	116.99	1210.53	1210.52	3	9.77269	P49792	RBP2_HUMAN	E3 SUMO-protein ligase RanBP2	1105	1121	NVSGISFTENMGSSQQK	N1GlcNAc@dEK17dE	1105	N2H8F0S0	01Y41Y41M(31M21M21M31G)61M(31M)61M	Mannose	160.18	1	N,0;	2	iIII3-3-X12/B,iI2-3-X25/C,
TR3	25350	117.04	915.123	915.123	3	0.732236	P20645	MPRD_HUMAN	Cation-dependent mannose-6-phosphate receptor	52	58	LKPLFNK	L1dEK2dEN6GlcNAcK7dE	57	N2H8F0S0	01Y41Y41M(31M21M)61M(31M21M)61M21M	Mannose	127.86	1	N,4;	1	45AI3,
TR2	25268	117.04	981.434	981.434	5	0.242642	Q9BVK6	TMED9_HUMAN	Transmembrane emp24 domain-containing protein 9	108	128	FTFTSHTPGEHQICLHSNSTK	F1dEC14CamN18GlcNAcK21dE	125	N4H5F3S1	01Y(61F)41Y41M(31M(21Y(31F)41L32S)41Y31F)61M61M	Hybrid	51.06	1	N,1;	8	iII2-3-A25/Z,iIII4-5-A12/Y,iIII4-5-A13/Z,iIII4-5-A15/Y,iIII4-5-A01/Y,X23/C,02AI2,BII2,iIII4-5-A12/Z,
TR1	25299	117.06	1356.11	1356.11	2	3.7014	P07339	CATD_HUMAN	Cathepsin D	257	266	GSLSYLNVTR	G1dEN7GlcNAc	263	N2H7F0S0	01Y41Y41M(31M21M)61M(31M21M)61M	Mannose	115.12	1	N,1;	1	iI2-3-B/Y,C/Z,
TR1	25299	117.06	1356.11	1356.11	2	3.7014	P07339	CATD_HUMAN	Cathepsin D	257	266	GSLSYLNVTR	G1dEN7GlcNAc	263	N2H7F0S0	01Y41Y41M(31M)61M(31M21M)61M21M	Mannose	112.7	2	N,1;	4	iI2-3-A35/Z,iI2-3-X35/B,iI2-3-A01/Y,iI2-3-B/Y,C/Z,
TR1	25299	117.06	1356.11	1356.11	2	3.7014	P07339	CATD_HUMAN	Cathepsin D	257	266	GSLSYLNVTR	G1dEN7GlcNAc	263	N2H7F0S0	01Y41Y41M(31M21M21M)61M(31M)61M	Mannose	112.7	2	N,1;	1	iI2-3-B/Y,C/Z,iIII2-3-B/Y,C/Z,
TR1	25338	117.24	867.065	867.064	3	1.20004	P11279	LAMP1_HUMAN	Lysosome-associated membrane glycoprotein 1	97	106	GHTLTLNFTR	G1dEN7GlcNAc	103	N2H6F0S0	01Y41Y41M(31M)61M(31M21M)61M	Mannose	101.56	1	N,5;	5	iI2-3-X15/C,iI2-3-X35/B,iI2-3-X45/C,iI2-3-X15/C,iI2-3-B/Y,C/Z,
TR1	25338	117.24	867.065	867.064	3	1.20004	P11279	LAMP1_HUMAN	Lysosome-associated membrane glycoprotein 1	97	106	GHTLTLNFTR	G1dEN7GlcNAc	103	N2H6F0S0	01Y41Y41M(31M21M)61M(31M)61M	Mannose	99.55	1	N,5;	4	iI2-3-A34/Z,iI2-3-A34/Y,iI2-3-A24/Z,iI2-3-B/Y,C/Z,
TR1	25338	117.24	867.065	867.069	3	-4.3866	O15360	FANCA_HUMAN	Fanconi anemia group A protein	1137	1146	GLLNACLRSR	G1dEN4GlcNAcC6Cam	1140	N2H6F0S0	01Y41Y41M(31M)61M(31M21M)61M	Mannose	73.77	1	N,1;	5	iI2-3-X15/C,iI2-3-X35/B,iI2-3-X45/C,iI2-3-X15/C,iI2-3-B/Y,C/Z,
TR1	25338	117.24	867.065	867.069	3	-4.3866	O15360	FANCA_HUMAN	Fanconi anemia group A protein	1137	1146	GLLNACLRSR	G1dEN4GlcNAcC6Cam	1140	N2H6F0S0	01Y41Y41M(31M21M)61M(31M)61M	Mannose	71.76	1	N,1;	4	iI2-3-A34/Z,iI2-3-A34/Y,iI2-3-A24/Z,iI2-3-B/Y,C/Z,
TR1	25338	117.24	867.065	867.066	3	-1.37416	A2PYH4	HFM1_HUMAN	Probable ATP-dependent DNA helicase HFM1	1388	1396	NPNSSNYKK	N1dEN3GlcNAcK8dEK9dE	1390	N2H6F0S0	01Y41Y41M(31M)61M(31M21M)61M	Mannose	60.68	1	N,0;	5	iI2-3-X15/C,iI2-3-X35/B,iI2-3-X45/C,iI2-3-X15/C,iI2-3-B/Y,C/Z,
TR1	25338	117.24	867.065	867.063	3	2.70397	Q9Y2M2	SSUH2_HUMAN	Protein SSUH2 homolog	211	219	GNKTCATCK	G1dEN2GlcNAcK3dEC5CamC8CamK9dE	212	N2H6F0S0	01Y41Y41M(31M)61M(31M21M)61M	Mannose	58.7	1	N,1;	5	iI2-3-X15/C,iI2-3-X35/B,iI2-3-X45/C,iI2-3-X15/C,iI2-3-B/Y,C/Z,
TR1	25338	117.24	867.065	867.066	3	-1.37416	A2PYH4	HFM1_HUMAN	Probable ATP-dependent DNA helicase HFM1	1388	1396	NPNSSNYKK	N1dEN3GlcNAcK8dEK9dE	1390	N2H6F0S0	01Y41Y41M(31M21M)61M(31M)61M	Mannose	58.67	1	N,0;	4	iI2-3-A34/Z,iI2-3-A34/Y,iI2-3-A24/Z,iI2-3-B/Y,C/Z,
TR1	25338	117.24	867.065	867.07	3	-5.67831	Q3KNS6	ZN829_HUMAN	Zinc finger protein 829	388	397	AFNKGSNLTR	A1dEK4dEN7GlcNAc	394	N2H6F0S0	01Y41Y41M(31M)61M(31M21M)61M	Mannose	58.43	1	N,0;	5	iI2-3-X15/C,iI2-3-X35/B,iI2-3-X45/C,iI2-3-X15/C,iI2-3-B/Y,C/Z,
TR1	25338	117.24	867.065	867.063	3	2.70397	Q9Y2M2	SSUH2_HUMAN	Protein SSUH2 homolog	211	219	GNKTCATCK	G1dEN2GlcNAcK3dEC5CamC8CamK9dE	212	N2H6F0S0	01Y41Y41M(31M21M)61M(31M)61M	Mannose	56.67	1	N,1;	4	iI2-3-A34/Z,iI2-3-A34/Y,iI2-3-A24/Z,iI2-3-B/Y,C/Z,
TR1	25338	117.24	867.065	867.07	3	-5.67831	Q3KNS6	ZN829_HUMAN	Zinc finger protein 829	388	397	AFNKGSNLTR	A1dEK4dEN7GlcNAc	394	N2H6F0S0	01Y41Y41M(31M21M)61M(31M)61M	Mannose	56.42	1	N,0;	4	iI2-3-A34/Z,iI2-3-A34/Y,iI2-3-A24/Z,iI2-3-B/Y,C/Z,
TR1	25338	117.24	867.065	867.059	3	7.02664	Q9UK23	NAGPA_HUMAN	N-acetylglucosamine-1-phosphodiester alpha-N-acetylglucosaminidase	418	427	TGNCSVSRVK	T1dEN3GlcNAcC4CamK10dE	420	N2H6F0S0	01Y41Y41M(31M)61M(31M21M)61M	Mannose	52.43	1	N,0;	5	iI2-3-X15/C,iI2-3-X35/B,iI2-3-X45/C,iI2-3-X15/C,iI2-3-B/Y,C/Z,
TR1	25338	117.24	867.065	867.059	3	7.02664	Q9UK23	NAGPA_HUMAN	N-acetylglucosamine-1-phosphodiester alpha-N-acetylglucosaminidase	418	427	TGNCSVSRVK	T1dEN3GlcNAcC4CamK10dE	420	N2H6F0S0	01Y41Y41M(31M21M)61M(31M)61M	Mannose	50.46	1	N,0;	4	iI2-3-A34/Z,iI2-3-A34/Y,iI2-3-A24/Z,iI2-3-B/Y,C/Z,
TR1	25338	117.24	866.061	866.057	3	4.83346	Q96JY0	MAEL_HUMAN	Protein maelstrom homolog	381	391	ISGQNSSVRGR	I1dEN5GlcNAc	385	N2H6F0S0	01Y41Y41M(31M)61M(31M21M)61M	Mannose	40.23	1	N,1;	5	iI2-3-X15/C,iI2-3-X35/B,iI2-3-X45/C,iI2-3-X15/C,iI2-3-B/Y,C/Z,
TR1	25338	117.24	866.061	866.062	3	-0.788569	Q92845	KIFA3_HUMAN	Kinesin-associated protein 3	489	498	NISQHDGPTK	N1GlcNAc@dEK10dE	489	N2H6F0S0	01Y41Y41M(31M)61M(31M21M)61M	Mannose	38.38	1	N,0;	5	iI2-3-X15/C,iI2-3-X35/B,iI2-3-X45/C,iI2-3-X15/C,iI2-3-B/Y,C/Z,
TR1	25338	117.24	866.061	866.058	3	3.5183	Q5VTT2	CI135_HUMAN	Protein C9orf135	186	195	SQFTDLNGSK	S1dEN7GlcNAcK10dE	192	N2H6F0S0	01Y41Y41M(31M)61M(31M21M)61M	Mannose	38.38	1	N,0;	5	iI2-3-X15/C,iI2-3-X35/B,iI2-3-X45/C,iI2-3-X15/C,iI2-3-B/Y,C/Z,
TR1	25338	117.24	866.061	866.062	3	-0.788569	Q92845	KIFA3_HUMAN	Kinesin-associated protein 3	489	498	NISQHDGPTK	N1GlcNAc@dEK10dE	489	N2H6F0S0	01Y41Y41M(31M21M)61M(31M)61M	Mannose	36.64	1	N,0;	4	iI2-3-A34/Z,iI2-3-A34/Y,iI2-3-A24/Z,iI2-3-B/Y,C/Z,
TR2	25344	117.4	1100.48	1100.48	3	3.9942	Q8WXX7	AUTS2_HUMAN	Autism susceptibility gene 2 protein	153	164	ENDRNLCQHLGK	E1dEN5GlcNAcC7CamK12dE	157	N2H8F0S0	01Y41Y41M(31M21M21M)61M(31M21M)61M	Mannose	80.4	1	N,1;	1	iI2-3-X35/B,
TR2	25344	117.4	1100.48	1100.48	3	3.9942	Q8WXX7	AUTS2_HUMAN	Autism susceptibility gene 2 protein	153	164	ENDRNLCQHLGK	E1dEN5GlcNAcC7CamK12dE	157	N2H8F0S0	01Y41Y41M(31M21M)61M(31M21M)61M21M	Mannose	78.32	2	N,1;	2	45AI3,iI2-3-B/Y,C/Z,
TR2	25344	117.4	1100.48	1100.48	3	3.9942	Q8WXX7	AUTS2_HUMAN	Autism susceptibility gene 2 protein	153	164	ENDRNLCQHLGK	E1dEN5GlcNAcC7CamK12dE	157	N2H8F0S0	01Y41Y41M(31M21M21M31G)61M(31M)61M	Mannose	78.32	2	N,1;	1	iIII3-3-X12/B,
TR2	25344	117.4	1100.48	1100.47	3	10.7813	Q6UXN8	CLC9A_HUMAN	C-type lectin domain family 9 member A	216	228	SNSLLSSNCSTWK	S1dEN8GlcNAcC9CamK13dE	223	N2H8F0S0	01Y41Y41M(31M21M21M31G)61M(31M)61M	Mannose	71.85	2	N,0;	1	iIII3-3-X12/B,
TR2	25362	117.48	920.085	920.08	3	4.6656	P38935	SMBP2_HUMAN	DNA-binding protein SMUBP-2	30	38	SWQENISLK	S1dEN5GlcNAcK9dE	34	N2H7F0S0	01Y41Y41M(31M21M)61M(31M21M)61M	Mannose	75.32	2	N,0;	2	iI2-3-X25/C,iI2-3-B/Y,C/Z,
TR2	25362	117.48	920.085	920.08	3	4.6656	P38935	SMBP2_HUMAN	DNA-binding protein SMUBP-2	30	38	SWQENISLK	S1dEN5GlcNAcK9dE	34	N2H7F0S0	01Y41Y41M(31M)61M(31M21M)61M21M	Mannose	73.31	1	N,0;	7	iI2-3-X15/C,iI2-3-X35/B,iI2-3-X45/C,iI2-4-X25/C,iI2-3-X35/C,iI2-3-B/Y,C/Z,iI2-4-X02/B,
TR2	25362	117.48	920.085	920.081	3	3.45374	O15297	PPM1D_HUMAN	Protein phosphatase 1D	228	238	IEGLGGSVMNK	I1dEN10GlcNAcK11dE	237	N2H7F0S0	01Y41Y41M(31M21M)61M(31M21M)61M	Mannose	72.81	1	N,1;	2	iI2-3-X25/C,iI2-3-B/Y,C/Z,
TR2	25362	117.48	920.085	920.081	3	3.45374	O15297	PPM1D_HUMAN	Protein phosphatase 1D	228	238	IEGLGGSVMNK	I1dEN10GlcNAcK11dE	237	N2H7F0S0	01Y41Y41M(31M21M21M)61M(31M)61M	Mannose	70.79	1	N,1;	4	iI2-3-X25/C,iI2-3-X35/B,iIII3-3-X12/B,iI2-3-B/Y,C/Z,iIII2-3-B/Y,C/Z,
TR2	25362	117.48	921.081	921.087	3	-6.60321	Q6NXR4	TTI2_HUMAN	TELO2-interacting protein 2	442	451	DPNLTPESVK	D1dEN3GlcNAcK10dE	444	N2H7F0S0	01Y41Y41M(31M)61M(31M21M)61M21M	Mannose	64.97	1	N,1;	7	iI2-3-X15/C,iI2-3-X35/B,iI2-3-X45/C,iI2-4-X25/C,iI2-3-X35/C,iI2-3-B/Y,C/Z,iI2-4-X02/B,
TR2	25362	117.48	920.085	920.072	3	13.7921	O95294	RASL1_HUMAN	RasGAP-activating-like protein 1	100	109	GIDSWINLSR	G1dEN7GlcNAc	106	N2H7F0S0	01Y41Y41M(31M21M21M)61M(31M)61M	Mannose	64.97	1	N,0;	4	iI2-3-X25/C,iI2-3-X35/B,iIII3-3-X12/B,iI2-3-B/Y,C/Z,iIII2-3-B/Y,C/Z,
TR2	25362	117.48	920.085	920.072	3	13.7921	O95294	RASL1_HUMAN	RasGAP-activating-like protein 1	100	109	GIDSWINLSR	G1dEN7GlcNAc	106	N2H7F0S0	01Y41Y41M(31M21M)61M(31M21M)61M	Mannose	62.99	1	N,0;	2	iI2-3-X25/C,iI2-3-B/Y,C/Z,
TR2	25362	117.48	921.081	921.077	3	5.11778	Q9UK23	NAGPA_HUMAN	N-acetylglucosamine-1-phosphodiester alpha-N-acetylglucosaminidase	418	427	TGNCSVSRVK	T1dEN3GlcNAcC4CamK10dE	420	N2H7F0S0	01Y41Y41M(31M21M)61M(31M21M)61M	Mannose	61.17	1	N,0;	2	iI2-3-X25/C,iI2-3-B/Y,C/Z,
TR2	25362	117.48	921.081	921.077	3	5.11778	Q9UK23	NAGPA_HUMAN	N-acetylglucosamine-1-phosphodiester alpha-N-acetylglucosaminidase	418	427	TGNCSVSRVK	T1dEN3GlcNAcC4CamK10dE	420	N2H7F0S0	01Y41Y41M(31M)61M(31M21M)61M21M	Mannose	59.25	1	N,0;	7	iI2-3-X15/C,iI2-3-X35/B,iI2-3-X45/C,iI2-4-X25/C,iI2-3-X35/C,iI2-3-B/Y,C/Z,iI2-4-X02/B,
TR2	25367	117.5	973.77	973.762	3	8.49016	P11279	LAMP1_HUMAN	Lysosome-associated membrane glycoprotein 1	97	106	GHTLTLNFTR	G1dEN7GlcNAc	103	N2H8F0S0	01Y41Y41M(31M21M)61M(31M21M)61M21M	Mannose	75.48	1	N,2;	2	45AI3,iI2-3-B/Y,C/Z,
TR2	25367	117.5	973.77	973.762	3	8.49016	P11279	LAMP1_HUMAN	Lysosome-associated membrane glycoprotein 1	97	106	GHTLTLNFTR	G1dEN7GlcNAc	103	N2H8F0S0	01Y41Y41M(31M21M21M)61M(31M21M)61M	Mannose	71.91	1	N,2;	4	iI2-3-X25/C,iI2-3-X35/B,iIII3-3-X12/B,iI2-3-X45/C,
TR2	25367	117.5	973.77	973.765	3	5.09198	P20929	NEBU_HUMAN	Nebulin	4414	4423	INSVNQSDVK	I1dEN5GlcNAcK10dE	4418	N2H8F0S0	01Y41Y41M(31M21M)61M(31M21M)61M21M	Mannose	62.99	1	N,1;	2	45AI3,iI2-3-B/Y,C/Z,
TR2	25367	117.5	973.77	973.761	3	8.71609	O00533	NCHL1_HUMAN	Neural cell adhesion molecule L1-like protein	297	305	IENVSYQDK	I1dEN3GlcNAcK9dE	299	N2H8F0S0	01Y41Y41M(31M21M)61M(31M21M)61M21M	Mannose	60.75	1	N,1;	2	45AI3,iI2-3-B/Y,C/Z,
TR2	25367	117.5	973.77	973.765	3	5.09198	P20929	NEBU_HUMAN	Nebulin	4414	4423	INSVNQSDVK	I1dEN5GlcNAcK10dE	4418	N2H8F0S0	01Y41Y41M(31M21M21M)61M(31M21M)61M	Mannose	59.4	1	N,1;	4	iI2-3-X25/C,iI2-3-X35/B,iIII3-3-X12/B,iI2-3-X45/C,
TR2	25367	117.5	973.77	973.761	3	8.71609	O00533	NCHL1_HUMAN	Neural cell adhesion molecule L1-like protein	297	305	IENVSYQDK	I1dEN3GlcNAcK9dE	299	N2H8F0S0	01Y41Y41M(31M21M21M)61M(31M21M)61M	Mannose	57.13	1	N,1;	4	iI2-3-X25/C,iI2-3-X35/B,iIII3-3-X12/B,iI2-3-X45/C,
TR2	25367	117.5	973.77	973.766	3	3.51254	Q86X10	RLGPB_HUMAN	Ral GTPase-activating protein subunit beta	1436	1444	QTVINICRR	Q1dEN5GlcNAcC7Cam	1440	N2H8F0S0	01Y41Y41M(31M21M)61M(31M21M)61M21M	Mannose	56.72	1	N,0;	2	45AI3,iI2-3-B/Y,C/Z,
TR2	25367	117.5	973.77	973.769	3	1.25943	Q03169	TNAP2_HUMAN	Tumor necrosis factor alpha-induced protein 2	620	629	GNLSNSEVKR	G1dEN2GlcNAcK9dE	621	N2H8F0S0	01Y41Y41M(31M21M)61M(31M21M)61M21M	Mannose	56.36	1	N,1;	2	45AI3,iI2-3-B/Y,C/Z,
TR2	25375	117.53	1210.86	1210.86	3	3.23314	Q8N743	KI3L3_HUMAN	Killer cell immunoglobulin-like receptor 3DL3	352	368	NAVVMDQEPAGNRTVNR	N1dEN12GlcNAc	363	N2H8F0S0	01Y41Y41M(31M21M)61M(31M21M)61M21M	Mannose	149.09	1	N,1;	2	45AI3,iI2-3-B/Y,C/Z,
TR2	25375	117.53	1210.86	1210.86	3	1.02644	Q9BUG6	ZSA5A_HUMAN	Zinc finger and SCAN domain-containing protein 5A	377	391	SHTGERLFQCNLCGK	S1dEC10CamN11GlcNAcC13CamK15dE	387	N2H8F0S0	01Y41Y41M(31M21M)61M(31M21M)61M21M	Mannose	147.61	1	N,0;	2	45AI3,iI2-3-B/Y,C/Z,
TR2	25375	117.53	1210.86	1210.86	3	3.23314	Q8N743	KI3L3_HUMAN	Killer cell immunoglobulin-like receptor 3DL3	352	368	NAVVMDQEPAGNRTVNR	N1dEN12GlcNAc	363	N2H8F0S0	01Y41Y41M(31M21M21M)61M(31M21M)61M	Mannose	144.42	1	N,1;	1	iI2-3-X45/C,
TR2	25375	117.53	1210.86	1210.86	3	1.02644	Q9BUG6	ZSA5A_HUMAN	Zinc finger and SCAN domain-containing protein 5A	377	391	SHTGERLFQCNLCGK	S1dEC10CamN11GlcNAcC13CamK15dE	387	N2H8F0S0	01Y41Y41M(31M21M21M)61M(31M21M)61M	Mannose	142.94	1	N,0;	1	iI2-3-X45/C,
TR2	25401	117.65	1381.12	1381.13	2	-2.16158	Q6NXR4	TTI2_HUMAN	TELO2-interacting protein 2	442	451	DPNLTPESVK	D1dEN3GlcNAcK10dE	444	N2H7F0S0	01Y41Y41M(31M21M)61M(31M21M)61M	Mannose	83.01	1	N,1;	1	iI2-3-B/Y,C/Z,
TR2	25401	117.65	1381.12	1381.13	2	-2.16158	Q6NXR4	TTI2_HUMAN	TELO2-interacting protein 2	442	451	DPNLTPESVK	D1dEN3GlcNAcK10dE	444	N2H7F0S0	01Y41Y41M(31M21M21M)61M(31M)61M	Mannose	73.74	1	N,1;	1	iI2-3-B/Y,C/Z,iIII2-3-B/Y,C/Z,
TR1	25423	117.65	1100.48	1100.47	3	6.02458	Q9BQ16-6	TICN3_HUMAN	Isoform 6 of Testican-3	1	14	MINNGSPQSLSMTR	M1dEN4GlcNAc	4	N2H8F0S0	01Y41Y41M(31M21M)61M(31M21M)61M21M	Mannose	58.9	1	N,0;	2	iI2-3-B/Y,C/Z,iI2-4-X35/B,
TR1	25423	117.65	1100.48	1100.47	3	6.02458	Q9BQ16-6	TICN3_HUMAN	Isoform 6 of Testican-3	1	14	MINNGSPQSLSMTR	M1dEN4GlcNAc	4	N2H8F0S0	01Y41Y41M(31M21M21M)61M(31M21M)61M	Mannose	56.9	1	N,0;	2	iI3-3-X15/B,iI2-3-X35/B,
TR2	25413	117.71	1265.22	1265.21	3	4.81423	Q8IYU2	HACE1_HUMAN	E3 ubiquitin-protein ligase HACE1	333	350	IGPSSPSNGIDMGYNGNK	I1dEN17GlcNAcK18dE	349	N2H9F0S0	01Y41Y41M(31M21M21M31G31G)61M(31M)61M	Mannose	157.65	1	N,1;	0
TR2	25413	117.71	1265.22	1265.21	3	4.81423	Q8IYU2	HACE1_HUMAN	E3 ubiquitin-protein ligase HACE1	333	350	IGPSSPSNGIDMGYNGNK	I1dEN17GlcNAcK18dE	349	N2H9F0S0	01Y41Y41M(31M21M21M31G)61M(31M21M)61M	Mannose	155.33	1	N,1;	0
TR2	25413	117.71	1265.54	1265.54	3	-0.788502	O95625	ZBT11_HUMAN	Zinc finger and BTB domain-containing protein 11	815	829	SHSVTEPYRCNICGK	S1dEC10CamN11GlcNAcC13CamK15dE	825	N2H9F0S0	01Y41Y41M(31M21M21M31G)61M(31M21M)61M	Mannose	125.39	2	N,0;	0
TR2	25413	117.71	1265.54	1265.54	3	-0.788502	O95625	ZBT11_HUMAN	Zinc finger and BTB domain-containing protein 11	815	829	SHSVTEPYRCNICGK	S1dEC10CamN11GlcNAcC13CamK15dE	825	N2H9F0S0	01Y41Y41M(31M21M21M31G31G)61M(31M)61M	Mannose	125.39	2	N,0;	0
TR2	25413	117.71	1265.54	1265.54	3	-0.788502	O95625	ZBT11_HUMAN	Zinc finger and BTB domain-containing protein 11	815	829	SHSVTEPYRCNICGK	S1dEC10CamN11GlcNAcC13CamK15dE	825	N2H9F0S0	01Y41Y41M(31M21M21M)61M(31M21M)61M21M	Mannose	109.76	1	N,0;	0
TR1	25453	117.79	1175.53	1175.53	3	1.36622	P54756	EPHA5_HUMAN	Ephrin type-A receptor 5	938	951	NPSSLKTLVNASCR	N1dEK6dEN10GlcNAcC13Cam	947	N2H9F0S0	01Y41Y41M(31M21M21M31G)61M(31M21M)61M	Mannose	92.21	1	N,0;	1	45AI3,
TR1	25453	117.79	1175.53	1175.53	3	1.36622	P54756	EPHA5_HUMAN	Ephrin type-A receptor 5	938	951	NPSSLKTLVNASCR	N1dEK6dEN10GlcNAcC13Cam	947	N2H9F0S0	01Y41Y41M(31M21M21M)61M(31M21M)61M21M	Mannose	90.06	1	N,0;	2	iI2-3-X35/B,iI3-3-X03/B,
TR2	25453	117.9	1210.86	1210.86	3	4.42523	O94779	CNTN5_HUMAN	Contactin-5	135	149	WLRNGTEIDLESDYR	W1dEN4GlcNAc	138	N2H8F0S0	01Y41Y41M(31M21M)61M(31M21M)61M21M	Mannose	175.58	1	N,0;	2	35AI3,iI2-3-B/Y,C/Z,
TR2	25453	117.9	1210.86	1210.86	3	4.42523	O94779	CNTN5_HUMAN	Contactin-5	135	149	WLRNGTEIDLESDYR	W1dEN4GlcNAc	138	N2H8F0S0	01Y41Y41M(31M21M21M)61M(31M21M)61M	Mannose	173.12	1	N,0;	1	iI2-3-X45/C,
TR2	25453	117.9	1211.2	1211.19	3	4.04988	Q8IYU2	HACE1_HUMAN	E3 ubiquitin-protein ligase HACE1	333	350	IGPSSPSNGIDMGYNGNK	I1dEN17GlcNAcK18dE	349	N2H8F0S0	01Y41Y41M(31M21M)61M(31M21M)61M21M	Mannose	143.33	1	N,0;	2	35AI3,iI2-3-B/Y,C/Z,
TR2	25453	117.9	1211.2	1211.19	3	4.04988	Q8IYU2	HACE1_HUMAN	E3 ubiquitin-protein ligase HACE1	333	350	IGPSSPSNGIDMGYNGNK	I1dEN17GlcNAcK18dE	349	N2H8F0S0	01Y41Y41M(31M21M21M)61M(31M21M)61M	Mannose	124.44	1	N,0;	1	iI2-3-X45/C,
TR2	25452	117.9	919.747	919.743	3	5.05944	Q96PY0	K1908_HUMAN	Putative uncharacterized protein PSMG3-AS1	83	93	AQAGSNQSRGK	A1dEN6GlcNAcK11dE	88	N2H7F0S0	01Y41Y41M(31M21M)61M(31M21M)61M	Mannose	81.37	1	N,1;	1	iI2-3-B/Y,C/Z,
TR2	25452	117.9	919.747	919.743	3	5.05944	Q96PY0	K1908_HUMAN	Putative uncharacterized protein PSMG3-AS1	83	93	AQAGSNQSRGK	A1dEN6GlcNAcK11dE	88	N2H7F0S0	01Y41Y41M(31M)61M(31M21M)61M21M	Mannose	79.33	2	N,1;	6	iI2-3-X15/C,iI2-3-X35/B,iI2-3-X45/C,iI2-3-A35/Z,iI2-3-X35/C,iI2-3-B/Y,C/Z,
TR2	25452	117.9	919.747	919.743	3	5.05944	Q96PY0	K1908_HUMAN	Putative uncharacterized protein PSMG3-AS1	83	93	AQAGSNQSRGK	A1dEN6GlcNAcK11dE	88	N2H7F0S0	01Y41Y41M(31M21M21M)61M(31M)61M	Mannose	79.33	2	N,1;	4	iI2-3-X25/C,iI3-3-X15/B,iI2-3-X35/B,iI2-3-B/Y,C/Z,iIII2-3-B/Y,C/Z,
TR2	25452	117.9	919.747	919.749	3	-1.68374	Q9NP59	S40A1_HUMAN	Solute carrier family 40 member 1	170	179	LANMNATIRR	L1dEN5GlcNAc	174	N2H7F0S0	01Y41Y41M(31M21M21M)61M(31M)61M	Mannose	76.09	1	N,1;	4	iI2-3-X25/C,iI3-3-X15/B,iI2-3-X35/B,iI2-3-B/Y,C/Z,iIII2-3-B/Y,C/Z,
TR2	25452	117.9	920.079	920.075	3	5.31233	Q8NA42	ZN383_HUMAN	Zinc finger protein 383	434	442	CSNLTRHLR	C1dE@CamN3GlcNAc	436	N2H7F0S0	01Y41Y41M(31M)61M(31M21M)61M21M	Mannose	73.78	1	N,1;	6	iI2-3-X15/C,iI2-3-X35/B,iI2-3-X45/C,iI2-3-A35/Z,iI2-3-X35/C,iI2-3-B/Y,C/Z,
TR2	25452	117.9	920.079	920.074	3	5.56992	Q96JY0	MAEL_HUMAN	Protein maelstrom homolog	381	391	ISGQNSSVRGR	I1dEN5GlcNAc	385	N2H7F0S0	01Y41Y41M(31M)61M(31M21M)61M21M	Mannose	73.52	1	N,0;	6	iI2-3-X15/C,iI2-3-X35/B,iI2-3-X45/C,iI2-3-A35/Z,iI2-3-X35/C,iI2-3-B/Y,C/Z,
TR2	25452	117.9	919.747	919.744	3	3.82431	Q92576	PHF3_HUMAN	PHD finger protein 3	410	418	QLESTEFNK	Q1dEN8GlcNAcK9dE	417	N2H7F0S0	01Y41Y41M(31M21M21M)61M(31M)61M	Mannose	69.81	1	N,1;	4	iI2-3-X25/C,iI3-3-X15/B,iI2-3-X35/B,iI2-3-B/Y,C/Z,iIII2-3-B/Y,C/Z,
TR2	25452	117.9	919.747	919.75	3	-2.69814	B2RTY4	MYO9A_HUMAN	Unconventional myosin-IXa	1675	1684	DNMSIPLVSK	D1dEN2GlcNAcK10dE	1676	N2H7F0S0	01Y41Y41M(31M21M21M)61M(31M)61M	Mannose	69.63	1	N,1;	4	iI2-3-X25/C,iI3-3-X15/B,iI2-3-X35/B,iI2-3-B/Y,C/Z,iIII2-3-B/Y,C/Z,
TR2	25452	117.9	919.747	919.749	3	-1.68374	Q9NP59	S40A1_HUMAN	Solute carrier family 40 member 1	170	179	LANMNATIRR	L1dEN5GlcNAc	174	N2H7F0S0	01Y41Y41M(31M21M)61M(31M21M)61M	Mannose	66.42	1	N,1;	1	iI2-3-B/Y,C/Z,
TR2	25452	117.9	919.747	919.738	3	10.0696	Q12879	NMDE1_HUMAN	Glutamate receptor ionotropic, NMDA 2A	378	386	WENHTLSLR	W1dEN3GlcNAc	380	N2H7F0S0	01Y41Y41M(31M21M)61M(31M21M)61M	Mannose	66.02	1	N,0;	1	iI2-3-B/Y,C/Z,
TR2	25452	117.9	920.079	920.074	3	5.46884	Q96P15	SPB11_HUMAN	Serpin B11	148	156	MINAWVENK	M1dEN8GlcNAcK9dE	155	N2H7F0S0	01Y41Y41M(31M)61M(31M21M)61M21M	Mannose	65.89	1	N,0;	6	iI2-3-X15/C,iI2-3-X35/B,iI2-3-X45/C,iI2-3-A35/Z,iI2-3-X35/C,iI2-3-B/Y,C/Z,
TR2	25452	117.9	920.079	920.073	3	6.72201	Q6L9W6	B4GN3_HUMAN	Beta-1,4-N-acetylgalactosaminyltransferase 3	383	391	LSHMETHNK	L1dEN8GlcNAcK9dE	390	N2H7F0S0	01Y41Y41M(31M21M21M)61M(31M)61M	Mannose	65.85	1	N,0;	4	iI2-3-X25/C,iI3-3-X15/B,iI2-3-X35/B,iI2-3-B/Y,C/Z,iIII2-3-B/Y,C/Z,
TR2	25452	117.9	919.747	919.738	3	10.0696	Q12879	NMDE1_HUMAN	Glutamate receptor ionotropic, NMDA 2A	378	386	WENHTLSLR	W1dEN3GlcNAc	380	N2H7F0S0	01Y41Y41M(31M)61M(31M21M)61M21M	Mannose	64.09	2	N,0;	6	iI2-3-X15/C,iI2-3-X35/B,iI2-3-X45/C,iI2-3-A35/Z,iI2-3-X35/C,iI2-3-B/Y,C/Z,
TR2	25452	117.9	919.747	919.738	3	10.0696	Q12879	NMDE1_HUMAN	Glutamate receptor ionotropic, NMDA 2A	378	386	WENHTLSLR	W1dEN3GlcNAc	380	N2H7F0S0	01Y41Y41M(31M21M21M)61M(31M)61M	Mannose	64.09	2	N,0;	4	iI2-3-X25/C,iI3-3-X15/B,iI2-3-X35/B,iI2-3-B/Y,C/Z,iIII2-3-B/Y,C/Z,
TR2	25452	117.9	920.079	920.073	3	6.72201	Q6L9W6	B4GN3_HUMAN	Beta-1,4-N-acetylgalactosaminyltransferase 3	383	391	LSHMETHNK	L1dEN8GlcNAcK9dE	390	N2H7F0S0	01Y41Y41M(31M)61M(31M21M)61M21M	Mannose	63.89	1	N,0;	6	iI2-3-X15/C,iI2-3-X35/B,iI2-3-X45/C,iI2-3-A35/Z,iI2-3-X35/C,iI2-3-B/Y,C/Z,
TR2	25452	117.9	919.747	919.748	3	-0.47254	P08571	CD14_HUMAN	Monocyte differentiation antigen CD14	149	158	LRNVSWATGR	L1dEN3GlcNAc	151	N2H7F0S0	01Y41Y41M(31M21M21M)61M(31M)61M	Mannose	63.79	1	N,1;	4	iI2-3-X25/C,iI3-3-X15/B,iI2-3-X35/B,iI2-3-B/Y,C/Z,iIII2-3-B/Y,C/Z,
TR2	25452	117.9	919.747	919.752	3	-5.54347	Q9Y2F5	ICE1_HUMAN	Little elongation complex subunit 1	1935	1944	SHVYVGNISK	S1dEN7GlcNAcK10dE	1941	N2H7F0S0	01Y41Y41M(31M21M21M)61M(31M)61M	Mannose	62.32	1	N,0;	4	iI2-3-X25/C,iI3-3-X15/B,iI2-3-X35/B,iI2-3-B/Y,C/Z,iIII2-3-B/Y,C/Z,
TR2	25452	117.9	919.747	919.744	3	3.82431	Q92576	PHF3_HUMAN	PHD finger protein 3	410	418	QLESTEFNK	Q1dEN8GlcNAcK9dE	417	N2H7F0S0	01Y41Y41M(31M21M)61M(31M21M)61M	Mannose	62.01	1	N,1;	1	iI2-3-B/Y,C/Z,
TR2	25452	117.9	919.747	919.75	3	-2.69814	B2RTY4	MYO9A_HUMAN	Unconventional myosin-IXa	1675	1684	DNMSIPLVSK	D1dEN2GlcNAcK10dE	1676	N2H7F0S0	01Y41Y41M(31M21M)61M(31M21M)61M	Mannose	59.96	1	N,1;	1	iI2-3-B/Y,C/Z,
TR2	25452	117.9	920.079	920.081	3	-2.18487	Q14207	NPAT_HUMAN	Protein NPAT	1388	1397	NLTNSSIPMK	N1GlcNAc@dEK10dE	1388	N2H7F0S0	01Y41Y41M(31M21M21M)61M(31M)61M	Mannose	59.84	1	N,0;	4	iI2-3-X25/C,iI3-3-X15/B,iI2-3-X35/B,iI2-3-B/Y,C/Z,iIII2-3-B/Y,C/Z,
[truncated: 765 more rows]
