# Supplementary material for: Site- and structure-specific characterization ofN-glycoprotein markers of MCF-7 cancer stem cells using isotopic-labelling quantitativeN-glycoproteomics
Source: Royal Society of Chemistry journal article supplement (doi:10.1039/c9cc04114a), 2019-01-01
Supplement: c9cc04114a3.xlsx [file c9cc04114a3.xlsx]

## Sheet: DEGPs
Accession Number	Protein ID	Protein Name	p-Seq.	p-PTMs	GlycoSite	Composition	g-Linkage	NoBHs	TR1_ratio (Tumor/Normal)	TR2_ratio (Tumor/Normal)	TR3_ratio (Tumor/Normal)	Average_ratio (Tumor/Normal)	STD_ratio (Tumor/Normal)	p-Value	Expression	Reference
A6NHM9	MOXD2_HUMAN	Putative DBH-like monooxygenase protein 2	NGTQLR	N1GlcNAc@dE	404	N2H8F0S0	01Y41Y41M(31M21M)61M(31M21M)61M21M	1	3.27083	3.71391	2.86189	3.28221	0.347928	9.56125e-05
A6NHM9	MOXD2_HUMAN	Putative DBH-like monooxygenase protein 2	NGTQLR	N1GlcNAc@dE	404	N2H8F0S0	01Y41Y41M(31M21M21M)61M(31M21M)61M	1	3.27083	3.71391	2.86189	3.28221	0.347928	9.56125e-05
A6NHM9	MOXD2_HUMAN	Putative DBH-like monooxygenase protein 2	NGTQLR	N1GlcNAc@dE	404	N2H9F0S0	01Y41Y41M(31M21M21M)61M(31M21M)61M21M	1	6.33256	6.46876	9.43765	7.41299	1.43273	0.000105827
O00469	PLOD2_HUMAN	Procollagen-lysine,2-oxoglutarate 5-dioxygenase 2	YNCSIESPR	Y1dEN2GlcNAcC3Cam	696	N2H8F0S0	01Y41Y41M(31M21M)61M(31M21M)61M21M	1	3.69735	2.3776		3.03748	0.659875	0.0388683	Up	Cell Communication and Signaling (2018) 16:100
O00469	PLOD2_HUMAN	Procollagen-lysine,2-oxoglutarate 5-dioxygenase 2	YNCSIESPR	Y1dEN2GlcNAcC3Cam	696	N2H8F0S0	01Y41Y41M(31M21M21M)61M(31M21M)61M	1	3.69735	2.3776		3.03748	0.659875	0.0388683	Up	Cell Communication and Signaling (2018) 16:100
O15360	FANCA_HUMAN	Fanconi anemia group A protein	GLLNACLRSR	G1dEN4GlcNAcC6Cam	1140	N2H6F0S0	01Y41Y41M(31M)61M(31M21M)61M	1	2.74793		3.34301	3.04547	0.297541	0.00772238	Up	Human Molecular Genetics, 2008, 17, 825–834
O15360	FANCA_HUMAN	Fanconi anemia group A protein	GLLNACLRSR	G1dEN4GlcNAcC6Cam	1140	N2H6F0S0	01Y41Y41M(31M21M)61M(31M)61M	1	2.74793		3.34301	3.04547	0.297541	0.00772238	Up	Human Molecular Genetics, 2008, 17, 825–834
O43310	CTIF_HUMAN	CBP80/20-dependent translation initiation factor	MENSSAASASSEAGSSR	M1dEN3GlcNAc	3	N4H5F2S1	01Y41Y41M(31M)61M(21Y(31F)41L32S)61Y(31F)41L	1	0.366274	0.492281		0.429277	0.0630032	0.0285203
O75113	N4BP1_HUMAN	NEDD4-binding protein 1	LGNRNITVFVPQWR	L1dEN5GlcNAc	656	N2H6F0S0	01Y41Y41M(31M)61M(31M21M)61M	1	0.233057	0.207251	0.214159	0.218156	0.0109078	1.65639e-06	Down	Oncotarget, 2016, 7, 37013-37029
O75197	LRP5_HUMAN	Low-density lipoprotein receptor-related protein 5	LNGTSR	L1dEN2GlcNAc	446	N2H7F0S0	01Y41Y41M(31M21M)61M(31M21M)61M	1		0.247654	0.190883	0.219269	0.0283859	0.00720067
O75197	LRP5_HUMAN	Low-density lipoprotein receptor-related protein 5	LNGTSR	L1dEN2GlcNAc	446	N2H7F0S0	01Y41Y41M(31M21M21M)61M(31M)61M	1		0.247654	0.190883	0.219269	0.0283859	0.00720067
O94851	MICA2_HUMAN	[F-actin]-monooxygenase MICAL2	SVNLSR	S1dEN3GlcNAc	509	N2H6F0S0	01Y41Y41M(31M)61M(31M21M)61M	1	0.245658	0.239625		0.242642	0.00301623	7.70395e-05
O94851	MICA2_HUMAN	[F-actin]-monooxygenase MICAL2	SVNLSR	S1dEN3GlcNAc	509	N2H6F0S0	01Y41Y41M(31M21M)61M(31M)61M	1	0.245658	0.239625		0.242642	0.00301623	7.70395e-05
O94851	MICA2_HUMAN	[F-actin]-monooxygenase MICAL2	SVNLSR	S1dEN3GlcNAc	509	N2H8F0S0	01Y41Y41M(31M21M)61M(31M21M)61M21M	1	0.251684	0.306253	0.28327	0.280402	0.0223695	2.37399e-05
O94851	MICA2_HUMAN	[F-actin]-monooxygenase MICAL2	SVNLSR	S1dEN3GlcNAc	509	N2H8F0S0	01Y41Y41M(31M21M21M)61M(31M21M)61M	1	0.251684	0.306253	0.28327	0.280402	0.0223695	2.37399e-05
O94851	MICA2_HUMAN	[F-actin]-monooxygenase MICAL2	SVNLSR	S1dEN3GlcNAc	509	N2H7F0S0	01Y41Y41M(31M)61M(31M21M)61M21M	1		0.286524	0.329933	0.308229	0.0217042	0.00355745
O94851	MICA2_HUMAN	[F-actin]-monooxygenase MICAL2	SVNLSR	S1dEN3GlcNAc	509	N2H7F0S0	01Y41Y41M(31M21M)61M(31M21M)61M	1		0.286524	0.329933	0.308229	0.0217042	0.00355745
O95714	HERC2_HUMAN	E3 ubiquitin-protein ligase HERC2	LNLASNR	L1dEN6GlcNAc	3746	N2H6F0S0	01Y41Y41M(31M)61M(31M21M)61M	2	0.604932	0.574816	0.611746	0.597165	0.016046	1.13171e-05	Down	Cancer Res, 2010, 70, 6384-6392
O95714	HERC2_HUMAN	E3 ubiquitin-protein ligase HERC2	LNLASNR	L1dEN6GlcNAc	3746	N2H6F0S0	01Y41Y41M(31M21M)61M(31M)61M	2	0.604932	0.675881	0.611746	0.630853	0.0319608	0.000195755	Down	Cancer Res, 2010, 70, 6384-6392
P07998	RNAS1_HUMAN	Ribonuclease pancreatic	LTNGSR	L1dEN3GlcNAc	116	N2H7F0S0	01Y41Y41M(31M21M)61M(31M21M)61M	1		0.247654	0.190883	0.219269	0.0283859	0.00720067
P07998	RNAS1_HUMAN	Ribonuclease pancreatic	LTNGSR	L1dEN3GlcNAc	116	N2H7F0S0	01Y41Y41M(31M21M21M)61M(31M)61M	1		0.247654	0.190883	0.219269	0.0283859	0.00720067
P07998	RNAS1_HUMAN	Ribonuclease pancreatic	LTNGSR	L1dEN3GlcNAc	116	N2H8F0S0	01Y41Y41M(31M21M)61M(31M21M)61M21M	1	0.255373		0.232692	0.244032	0.0113405	0.00108368
P07998	RNAS1_HUMAN	Ribonuclease pancreatic	LTNGSR	L1dEN3GlcNAc	116	N2H8F0S0	01Y41Y41M(31M21M21M)61M(31M21M)61M	1	0.255373	0.318271	0.232692	0.268778	0.0362009	0.000141119
P11279	LAMP1_HUMAN	Lysosome-associated membrane glycoprotein 1	GHTLTLNFTR	G1dEN7GlcNAc	103	N2H6F0S0	01Y41Y41M(31M)61M(31M21M)61M	1	2.74793		3.34301	3.04547	0.297541	0.00772238	Up	Oncology Letters, 2017, 14: 4729-4735
P11279	LAMP1_HUMAN	Lysosome-associated membrane glycoprotein 1	GHTLTLNFTR	G1dEN7GlcNAc	103	N2H6F0S0	01Y41Y41M(31M21M)61M(31M)61M	1	2.74793		3.34301	3.04547	0.297541	0.00772238	Up	Oncology Letters, 2017, 14: 4729-4735
P11279	LAMP1_HUMAN	Lysosome-associated membrane glycoprotein 1	AANGSLR	A1dEN3GlcNAc	322	N2H8F0S0	01Y41Y41M(31M21M21M31G)61M(31M)61M	2	3.27083	3.45084	2.50743	3.07637	0.408958	0.00035137	Up	Oncology Letters, 2017, 14: 4729-4735
P11279	LAMP1_HUMAN	Lysosome-associated membrane glycoprotein 1	AANGSLR	A1dEN3GlcNAc	322	N2H8F0S0	01Y41Y41M(31M21M)61M(31M21M)61M21M	1	3.27083	3.71391	2.86189	3.28221	0.347928	9.56125e-05	Up	Oncology Letters, 2017, 14: 4729-4735
P11279	LAMP1_HUMAN	Lysosome-associated membrane glycoprotein 1	AANGSLR	A1dEN3GlcNAc	322	N2H8F0S0	01Y41Y41M(31M21M21M)61M(31M21M)61M	1	3.27083	3.71391	2.86189	3.28221	0.347928	9.56125e-05	Up	Oncology Letters, 2017, 14: 4729-4735
P11279	LAMP1_HUMAN	Lysosome-associated membrane glycoprotein 1	AANGSLR	A1dEN3GlcNAc	322	N2H9F0S0	01Y41Y41M(31M21M21M31G31G)61M(31M)61M	1	4.4594	6.03164	9.43765	6.6429	2.07781	0.00106262	Up	Oncology Letters, 2017, 14: 4729-4735
P11279	LAMP1_HUMAN	Lysosome-associated membrane glycoprotein 1	AANGSLR	A1dEN3GlcNAc	322	N2H9F0S0	01Y41Y41M(31M21M21M31G)61M(31M21M)61M	2	4.4594	6.46876	9.43765	6.78861	2.04491	0.00098885	Up	Oncology Letters, 2017, 14: 4729-4735
P11279	LAMP1_HUMAN	Lysosome-associated membrane glycoprotein 1	AANGSLR	A1dEN3GlcNAc	322	N2H9F0S0	01Y41Y41M(31M21M21M)61M(31M21M)61M21M	1	6.33256	6.46876	9.43765	7.41299	1.43273	0.000105827	Up	Oncology Letters, 2017, 14: 4729-4735
P11532	DMD_HUMAN	Dystrophin	AQNVTR	A1dEN3GlcNAc	2899	N2H8F0S0	01Y41Y41M(31M21M)61M(31M21M)61M21M	1	3.27083	3.71391	2.86189	3.28221	0.347928	9.56125e-05	Up	Oncotarget, 2017, 8, 145-155
P11532	DMD_HUMAN	Dystrophin	AQNVTR	A1dEN3GlcNAc	2899	N2H8F0S0	01Y41Y41M(31M21M21M)61M(31M21M)61M	1	3.27083	3.71391	2.86189	3.28221	0.347928	9.56125e-05	Up	Oncotarget, 2017, 8, 145-155
P11532	DMD_HUMAN	Dystrophin	AQNVTR	A1dEN3GlcNAc	2899	N2H9F0S0	01Y41Y41M(31M21M21M31G31G)61M(31M)61M	1	4.4594	6.03164	9.43765	6.6429	2.07781	0.00106262	Up	Oncotarget, 2017, 8, 145-155
P11532	DMD_HUMAN	Dystrophin	AQNVTR	A1dEN3GlcNAc	2899	N2H9F0S0	01Y41Y41M(31M21M21M31G)61M(31M21M)61M	2	4.4594	6.46876	9.43765	6.78861	2.04491	0.00098885	Up	Oncotarget, 2017, 8, 145-155
P11532	DMD_HUMAN	Dystrophin	AQNVTR	A1dEN3GlcNAc	2899	N2H9F0S0	01Y41Y41M(31M21M21M)61M(31M21M)61M21M	1	6.33256	6.46876	9.43765	7.41299	1.43273	0.000105827	Up	Oncotarget, 2017, 8, 145-155
P15144	AMPN_HUMAN	Aminopeptidase N	AEFNITLIHPK	A1dEN4GlcNAcK11dE	234	N2H7F0S0	01Y41Y41M(31M21M)61M(31M21M)61M	1	12.7915	11.275		12.0332	0.75825	0.000643729	Up	J Clin Invest, 2010, 120, 3326-3339.
P15144	AMPN_HUMAN	Aminopeptidase N	AEFNITLIHPK	A1dEN4GlcNAcK11dE	234	N2H7F0S0	01Y41Y41M(31M21M21M)61M(31M)61M	1	12.7915	11.275		12.0332	0.75825	0.000643729	Up	J Clin Invest, 2010, 120, 3326-3339.
P16383	GCFC2_HUMAN	GC-rich sequence DNA-binding factor 2	SAVENK	S1dEN5GlcNAcK6dE	634	N2H8F0S0	01Y41Y41M(31M21M)61M(31M21M)61M21M	1	3.82629	2.59738		3.21184	0.614452	0.027298
P16383	GCFC2_HUMAN	GC-rich sequence DNA-binding factor 2	SAVENK	S1dEN5GlcNAcK6dE	634	N2H8F0S0	01Y41Y41M(31M21M21M)61M(31M21M)61M	1	3.82629	2.59738		3.21184	0.614452	0.027298
P30501	1C02_HUMAN	HLA class I histocompatibility antigen, Cw-2 alpha chain	GYYNQSEAGSHTLQR	G1dEN4GlcNAc	110	N6H7F0S0	01Y41Y41M(31M41Y41L)61M(21Y41L31Y41L)61Y41L	1	0.27045	0.437213	0.314922	0.340861	0.0705084	0.00150157
P30501	1C02_HUMAN	HLA class I histocompatibility antigen, Cw-2 alpha chain	GYYNQSEAGSHTLQR	G1dEN4GlcNAc	110	N4H5F3S1	01Y(61F)41Y41M(31M21Y(31F)41L21F)61M61Y41L32S	1	0.544244	0.53248		0.538362	0.00588174	0.000311111
P30501	1C02_HUMAN	HLA class I histocompatibility antigen, Cw-2 alpha chain	GYYNQSEAGSHTLQR	G1dEN4GlcNAc	110	N4H5F1S2	01Y(61F)41Y41M(31M41Y41L32S)61M61Y41L32S	1		0.632997	0.516143	0.57457	0.058427	0.0317078
P30501	1C02_HUMAN	HLA class I histocompatibility antigen, Cw-2 alpha chain	GYYNQSEAGSHTLQR	G1dEN4GlcNAc	110	N4H5F1S2	01Y(61F)41Y41M(31M)61M(21Y41L32S)61Y41L32S	1	0.661262	0.787657	0.516143	0.655021	0.110933	0.0233522
P46977	STT3A_HUMAN	Dolichyl-diphosphooligosaccharide--protein glycosyltransferase subunit STT3A	TILVDNNTWNNTHISR	T1dEN10GlcNAc	548	N2H9F0S0	01Y41Y41M(31M21M21M31G)61M(31M21M)61M	2		3.40743	3.2288	3.31812	0.0893139	0.000503816	Up	Laryngoscope, 2011, 121: 983–989
P46977	STT3A_HUMAN	Dolichyl-diphosphooligosaccharide--protein glycosyltransferase subunit STT3A	TILVDNNTWNNTHISR	T1dEN6GlcNAc	544	N2H9F0S0	01Y41Y41M(31M21M21M31G)61M(31M21M)61M	2		3.40743	3.2288	3.31812	0.0893139	0.000503816	Up	Laryngoscope, 2011, 121: 983–989
P46977	STT3A_HUMAN	Dolichyl-diphosphooligosaccharide--protein glycosyltransferase subunit STT3A	TILVDNNTWNNTHISR	T1dEN10GlcNAc	548	N2H9F0S0	01Y41Y41M(31M21M21M)61M(31M21M)61M21M	1	3.45145	3.40743	3.2288	3.36256	0.0962717	4.82739e-07	Up	Laryngoscope, 2011, 121: 983–989
P46977	STT3A_HUMAN	Dolichyl-diphosphooligosaccharide--protein glycosyltransferase subunit STT3A	TILVDNNTWNNTHISR	T1dEN10GlcNAc	548	N2H9F0S0	01Y41Y41M(31M21M21M31G31G)61M(31M)61M	1	3.45145	3.40743	3.2288	3.36256	0.0962717	4.82739e-07	Up	Laryngoscope, 2011, 121: 983–989
P46977	STT3A_HUMAN	Dolichyl-diphosphooligosaccharide--protein glycosyltransferase subunit STT3A	TILVDNNTWNNTHISR	T1dEN6GlcNAc	544	N2H9F0S0	01Y41Y41M(31M21M21M)61M(31M21M)61M21M	1	3.45145	3.40743	3.2288	3.36256	0.0962717	4.82739e-07	Up	Laryngoscope, 2011, 121: 983–989
P46977	STT3A_HUMAN	Dolichyl-diphosphooligosaccharide--protein glycosyltransferase subunit STT3A	TILVDNNTWNNTHISR	T1dEN6GlcNAc	544	N2H9F0S0	01Y41Y41M(31M21M21M31G31G)61M(31M)61M	1	3.45145	3.40743	3.2288	3.36256	0.0962717	4.82739e-07	Up	Laryngoscope, 2011, 121: 983–989
P50454	SERPH_HUMAN	Serpin H1	SLSNSTAR	S1dEN4GlcNAc	120	N2H8F0S0	01Y41Y41M(31M21M)61M(31M21M)61M21M	1	1.57843	1.46517	1.5625	1.53537	0.0500592	5.16776e-05
P50454	SERPH_HUMAN	Serpin H1	SLSNSTAR	S1dEN4GlcNAc	120	N2H8F0S0	01Y41Y41M(31M21M21M)61M(31M21M)61M	1	1.57843	1.46517	1.5625	1.53537	0.0500592	5.16776e-05
P50454	SERPH_HUMAN	Serpin H1	SLSNSTAR	S1dEN4GlcNAc	120	N2H7F0S0	01Y41Y41M(31M21M21M)61M(31M)61M	2	1.41412	1.83681	1.47398	1.57497	0.186756	0.0052784
P50454	SERPH_HUMAN	Serpin H1	SLSNSTAR	S1dEN4GlcNAc	120	N2H7F0S0	01Y41Y41M(31M)61M(31M21M)61M21M	1	1.61094	1.50082	1.67469	1.59548	0.0718175	0.000130583
P50454	SERPH_HUMAN	Serpin H1	SLSNSTAR	S1dEN4GlcNAc	120	N2H8F0S0	01Y41Y41M(31M21M21M31G)61M(31M)61M	2	1.57843	1.81694	1.40877	1.60138	0.167425	0.00319763
P50454	SERPH_HUMAN	Serpin H1	SLSNSTAR	S1dEN4GlcNAc	120	N2H7F0S0	01Y41Y41M(31M21M)61M(31M21M)61M	1	1.61094	1.83681	1.67469	1.70748	0.0950836	0.00016405
P50454	SERPH_HUMAN	Serpin H1	SLSNSTAR	S1dEN4GlcNAc	120	N2H5F0S0	01Y41Y41M(31M)61M(31M)61M	1	3.77215	3.69996	5.24695	4.23969	0.712854	0.000226577
P50851	LRBA_HUMAN	Lipopolysaccharide-responsive and beige-like anchor protein	ATNLTR	A1dEN3GlcNAc	1217	N2H8F0S0	01Y41Y41M(31M21M)61M(31M21M)61M21M	1	0.251684	0.306253	0.28327	0.280402	0.0223695	2.37399e-05	Down	Oncogene, 2004, 23, 4089–4097
P50851	LRBA_HUMAN	Lipopolysaccharide-responsive and beige-like anchor protein	ATNLTR	A1dEN3GlcNAc	1217	N2H8F0S0	01Y41Y41M(31M21M21M)61M(31M21M)61M	1	0.251684	0.306253	0.28327	0.280402	0.0223695	2.37399e-05	Down	Oncogene, 2004, 23, 4089–4097
P50851	LRBA_HUMAN	Lipopolysaccharide-responsive and beige-like anchor protein	ATNLTR	A1dEN3GlcNAc	1217	N2H7F0S0	01Y41Y41M(31M)61M(31M21M)61M21M	1		0.286524	0.329933	0.308229	0.0217042	0.00355745	Down	Oncogene, 2004, 23, 4089–4097
P50851	LRBA_HUMAN	Lipopolysaccharide-responsive and beige-like anchor protein	ATNLTR	A1dEN3GlcNAc	1217	N2H7F0S0	01Y41Y41M(31M21M)61M(31M21M)61M	1		0.286524	0.329933	0.308229	0.0217042	0.00355745	Down	Oncogene, 2004, 23, 4089–4097
P82987	ATL3_HUMAN	ADAMTS-like protein 3	ANGTVQVVSPR	A1dEN2GlcNAc	1516	N2H8F0S0	01Y41Y41M(31M21M21M)61M(31M21M)61M	1	10.0625	12.0794	13.3482	11.83	1.3529	7.56833e-06	Up	International Journal of Neuropsychopharmacology (2019) 22(3): 186–193
P82987	ATL3_HUMAN	ADAMTS-like protein 3	ANGTVQVVSPR	A1dEN2GlcNAc	1516	N2H8F0S0	01Y41Y41M(31M21M21M31G)61M(31M)61M	1	10.0625	12.0794	13.3482	11.83	1.3529	7.56833e-06	Up	International Journal of Neuropsychopharmacology (2019) 22(3): 186–193
Q08380	LG3BP_HUMAN	Galectin-3-binding protein	ALGFENATQALGR	A1dEN6GlcNAc	69	N2H8F0S0	01Y41Y41M(31M21M21M)61M(31M21M)61M	1	0.446866	0.633793	0.36871	0.483123	0.111215	0.00897357
Q15722	LT4R1_HUMAN	Leukotriene B4 receptor 1	TNMSLCFPR	T1dEN2GlcNAcC6Cam	164	N2H8F0S0	01Y41Y41M(31M21M)61M(31M21M)61M21M	1	3.69735	2.3776		3.03748	0.659875	0.0388683
Q15722	LT4R1_HUMAN	Leukotriene B4 receptor 1	TNMSLCFPR	T1dEN2GlcNAcC6Cam	164	N2H8F0S0	01Y41Y41M(31M21M21M)61M(31M21M)61M	1	3.69735	2.3776		3.03748	0.659875	0.0388683
Q16555	DPYL2_HUMAN	Dihydropyrimidinase-related protein 2	ANITSLG	A1dEN2GlcNAc	567	N2H6F0S0	01Y41Y41M(31M)61M(31M21M)61M	1	0.245658	0.239625		0.242642	0.00301623	7.70395e-05
Q16555	DPYL2_HUMAN	Dihydropyrimidinase-related protein 2	ANITSLG	A1dEN2GlcNAc	567	N2H6F0S0	01Y41Y41M(31M21M)61M(31M)61M	1	0.245658	0.239625		0.242642	0.00301623	7.70395e-05
Q32P28	P3H1_HUMAN	Prolyl 3-hydroxylase 1	LLNGSQR	L1dEN3GlcNAc	467	N2H6F0S0	01Y41Y41M(31M)61M(31M21M)61M	2	0.604932	0.574816	0.611746	0.597165	0.016046	1.13171e-05	Down	British Journal of Cancer (2009) 100, 1687 – 1696
Q32P28	P3H1_HUMAN	Prolyl 3-hydroxylase 1	LLNGSQR	L1dEN3GlcNAc	467	N2H6F0S0	01Y41Y41M(31M21M)61M(31M)61M	2	0.604932	0.574816	0.611746	0.597165	0.016046	1.13171e-05	Down	British Journal of Cancer (2009) 100, 1687 – 1696
Q3KNS6	ZN829_HUMAN	Zinc finger protein 829	GSNLTR	G1dEN3GlcNAc	394	N2H7F0S0	01Y41Y41M(31M21M)61M(31M21M)61M	1		0.247654	0.190883	0.219269	0.0283859	0.00720067
Q3KNS6	ZN829_HUMAN	Zinc finger protein 829	GSNLTR	G1dEN3GlcNAc	394	N2H7F0S0	01Y41Y41M(31M21M21M)61M(31M)61M	1		0.247654	0.190883	0.219269	0.0283859	0.00720067
Q3KNS6	ZN829_HUMAN	Zinc finger protein 829	GSNLTR	G1dEN3GlcNAc	394	N2H8F0S0	01Y41Y41M(31M21M)61M(31M21M)61M21M	1	0.255373		0.232692	0.244032	0.0113405	0.00108368
Q3KNS6	ZN829_HUMAN	Zinc finger protein 829	GSNLTR	G1dEN3GlcNAc	394	N2H8F0S0	01Y41Y41M(31M21M21M)61M(31M21M)61M	1	0.255373	0.318271	0.232692	0.268778	0.0362009	0.000141119
Q5T200	ZC3HD_HUMAN	Zinc finger CCCH domain-containing protein 13	SSSLGSNR	S1dEN7GlcNAc	1195	N2H6F0S0	01Y41Y41M(31M)61M(31M21M)61M	1	0.0960146		0.0891724	0.0925935	0.00342107	0.000241084
Q5T200	ZC3HD_HUMAN	Zinc finger CCCH domain-containing protein 13	SSSLGSNR	S1dEN7GlcNAc	1195	N2H6F0S0	01Y41Y41M(31M21M)61M(31M)61M	1	0.0960146		0.0891724	0.0925935	0.00342107	0.000241084
Q5VV52	ZN691_HUMAN	Zinc finger protein 691	TFNNTSNLR	T1dEN3GlcNAc	125	N2H8F0S0	01Y41Y41M(31M21M)61M(31M21M)61M21M	1	0.501953		0.41902	0.460486	0.0414666	0.0131524
Q5VV52	ZN691_HUMAN	Zinc finger protein 691	TFNNTSNLR	T1dEN4GlcNAc	126	N2H8F0S0	01Y41Y41M(31M21M)61M(31M21M)61M21M	1	0.501953		0.41902	0.460486	0.0414666	0.0131524
Q5VV52	ZN691_HUMAN	Zinc finger protein 691	TFNNTSNLR	T1dEN3GlcNAc	125	N2H8F0S0	01Y41Y41M(31M21M21M)61M(31M21M)61M	1	0.501953	0.562678	0.41902	0.49455	0.0588812	0.00115609
Q5VV52	ZN691_HUMAN	Zinc finger protein 691	TFNNTSNLR	T1dEN4GlcNAc	126	N2H8F0S0	01Y41Y41M(31M21M21M)61M(31M21M)61M	1	0.501953	0.562678	0.41902	0.49455	0.0588812	0.00115609
Q6IN85	P4R3A_HUMAN	Serine/threonine-protein phosphatase 4 regulatory subunit 3A	TNLSGR	T1dEN2GlcNAc	735	N2H7F0S0	01Y41Y41M(31M21M)61M(31M21M)61M	1		0.247654	0.190883	0.219269	0.0283859	0.00720067
Q6IN85	P4R3A_HUMAN	Serine/threonine-protein phosphatase 4 regulatory subunit 3A	TNLSGR	T1dEN2GlcNAc	735	N2H7F0S0	01Y41Y41M(31M21M21M)61M(31M)61M	1		0.247654	0.190883	0.219269	0.0283859	0.00720067
Q6IN85	P4R3A_HUMAN	Serine/threonine-protein phosphatase 4 regulatory subunit 3A	TNLSGR	T1dEN2GlcNAc	735	N2H8F0S0	01Y41Y41M(31M21M)61M(31M21M)61M21M	1	0.255373		0.232692	0.244032	0.0113405	0.00108368
Q6IN85	P4R3A_HUMAN	Serine/threonine-protein phosphatase 4 regulatory subunit 3A	TNLSGR	T1dEN2GlcNAc	735	N2H8F0S0	01Y41Y41M(31M21M21M)61M(31M21M)61M	1	0.255373	0.318271	0.232692	0.268778	0.0362009	0.000141119
Q6UWU4	CF089_HUMAN	Bombesin receptor-activated protein C6orf89	DASLNK	D1dEN5GlcNAcK6dE	261	N2H8F0S0	01Y41Y41M(31M21M)61M(31M21M)61M21M	1	3.82629	2.59738		3.21184	0.614452	0.027298
Q6UWU4	CF089_HUMAN	Bombesin receptor-activated protein C6orf89	DASLNK	D1dEN5GlcNAcK6dE	261	N2H8F0S0	01Y41Y41M(31M21M21M)61M(31M21M)61M	1	3.82629	2.59738		3.21184	0.614452	0.027298
Q7RTR2	NLRC3_HUMAN	NLR family CARD domain-containing protein 3	VNSSLR	V1dEN2GlcNAc	1001	N2H6F0S0	01Y41Y41M(31M)61M(31M21M)61M	1	0.245658	0.239625		0.242642	0.00301623	7.70395e-05
Q7RTR2	NLRC3_HUMAN	NLR family CARD domain-containing protein 3	VNSSLR	V1dEN2GlcNAc	1001	N2H6F0S0	01Y41Y41M(31M21M)61M(31M)61M	1	0.245658	0.239625		0.242642	0.00301623	7.70395e-05
Q7RTR2	NLRC3_HUMAN	NLR family CARD domain-containing protein 3	VNSSLR	V1dEN2GlcNAc	1001	N2H8F0S0	01Y41Y41M(31M21M)61M(31M21M)61M21M	1	0.251684	0.306253	0.28327	0.280402	0.0223695	2.37399e-05
Q7RTR2	NLRC3_HUMAN	NLR family CARD domain-containing protein 3	VNSSLR	V1dEN2GlcNAc	1001	N2H8F0S0	01Y41Y41M(31M21M21M)61M(31M21M)61M	1	0.251684	0.306253	0.28327	0.280402	0.0223695	2.37399e-05
Q7RTR2	NLRC3_HUMAN	NLR family CARD domain-containing protein 3	VNSSLR	V1dEN2GlcNAc	1001	N2H7F0S0	01Y41Y41M(31M)61M(31M21M)61M21M	1		0.286524	0.329933	0.308229	0.0217042	0.00355745
Q7RTR2	NLRC3_HUMAN	NLR family CARD domain-containing protein 3	VNSSLR	V1dEN2GlcNAc	1001	N2H7F0S0	01Y41Y41M(31M21M)61M(31M21M)61M	1		0.286524	0.329933	0.308229	0.0217042	0.00355745
Q8IVH8	M4K3_HUMAN	Mitogen-activated protein kinase kinase kinase kinase 3	GTNLSR	G1dEN3GlcNAc	519	N2H7F0S0	01Y41Y41M(31M21M)61M(31M21M)61M	1		0.247654	0.190883	0.219269	0.0283859	0.00720067
Q8IVH8	M4K3_HUMAN	Mitogen-activated protein kinase kinase kinase kinase 3	GTNLSR	G1dEN3GlcNAc	519	N2H7F0S0	01Y41Y41M(31M21M21M)61M(31M)61M	1		0.247654	0.190883	0.219269	0.0283859	0.00720067
Q8IVH8	M4K3_HUMAN	Mitogen-activated protein kinase kinase kinase kinase 3	GTNLSR	G1dEN3GlcNAc	519	N2H8F0S0	01Y41Y41M(31M21M)61M(31M21M)61M21M	1	0.255373		0.232692	0.244032	0.0113405	0.00108368
Q8IVH8	M4K3_HUMAN	Mitogen-activated protein kinase kinase kinase kinase 3	GTNLSR	G1dEN3GlcNAc	519	N2H8F0S0	01Y41Y41M(31M21M21M)61M(31M21M)61M	1	0.255373	0.318271	0.232692	0.268778	0.0362009	0.000141119
Q8IYU4	UBQLN_HUMAN	Ubiquilin-like protein	NISSSATR	N1GlcNAc@dE	25	N2H8F0S0	01Y41Y41M(31M21M)61M(31M21M)61M21M	1	1.57843	1.46517	1.5625	1.53537	0.0500592	5.16776e-05
Q8IYU4	UBQLN_HUMAN	Ubiquilin-like protein	NISSSATR	N1GlcNAc@dE	25	N2H8F0S0	01Y41Y41M(31M21M21M)61M(31M21M)61M	1	1.57843	1.46517	1.5625	1.53537	0.0500592	5.16776e-05
Q8IYU4	UBQLN_HUMAN	Ubiquilin-like protein	NISSSATR	N1GlcNAc@dE	25	N2H8F0S0	01Y41Y41M(31M21M21M31G)61M(31M)61M	2	1.57843	1.81694	1.40877	1.60138	0.167425	0.00319763
Q8IYU4	UBQLN_HUMAN	Ubiquilin-like protein	NISSSATR	N1GlcNAc@dE	25	N2H7F0S0	01Y41Y41M(31M21M)61M(31M21M)61M	1	1.61094	1.83681	1.67469	1.70748	0.0950836	0.00016405
Q8IYU4	UBQLN_HUMAN	Ubiquilin-like protein	NISSSATR	N1GlcNAc@dE	25	N2H5F0S0	01Y41Y41M(31M)61M(31M)61M	1	3.77215	3.69996	5.24695	4.23969	0.712854	0.000226577
Q8NBJ5	GT251_HUMAN	Procollagen galactosyltransferase 1	AMNTSQVEALGIQMLPGYRDPYHGRPLTK	A1dEN3GlcNAcK29dE	381	N2H6F0S0	01Y41Y41M(31M)61M(31M21M)61M	2	3.31566	4.71407	3.9964	4.00871	0.570967	0.000171277
Q92994	TF3B_HUMAN	Transcription factor IIIB 90 kDa subunit	YILNESEAR	Y1dEN4GlcNAc	463	N2H8F0S0	01Y41Y41M(31M21M21M31G)61M(31M)61M	1		0.614154	0.642622	0.628388	0.0142337	0.00236674
Q95604	1C17_HUMAN	HLA class I histocompatibility antigen, Cw-17 alpha chain	GYYNQSEAGSHTIQR	G1dEN4GlcNAc	110	N6H7F0S0	01Y41Y41M(31M41Y41L)61M(21Y41L31Y41L)61Y41L	1	0.27045	0.437213	0.314922	0.340861	0.0705084	0.00150157
Q95604	1C17_HUMAN	HLA class I histocompatibility antigen, Cw-17 alpha chain	GYYNQSEAGSHTIQR	G1dEN4GlcNAc	110	N4H5F3S1	01Y(61F)41Y41M(31M21Y(31F)41L21F)61M61Y41L32S	1	0.544244	0.53248		0.538362	0.00588174	0.000311111
Q95604	1C17_HUMAN	HLA class I histocompatibility antigen, Cw-17 alpha chain	GYYNQSEAGSHTIQR	G1dEN4GlcNAc	110	N4H5F1S2	01Y(61F)41Y41M(31M41Y41L32S)61M61Y41L32S	1		0.632997	0.516143	0.57457	0.058427	0.0317078
Q95604	1C17_HUMAN	HLA class I histocompatibility antigen, Cw-17 alpha chain	GYYNQSEAGSHTIQR	G1dEN4GlcNAc	110	N4H5F1S2	01Y(61F)41Y41M(31M)61M(21Y41L32S)61Y41L32S	1	0.661262	0.787657	0.516143	0.655021	0.110933	0.0233522
Q96CN4	EVI5L_HUMAN	EVI5-like protein	SMNGSRR	S1dEN3GlcNAc	59	N2H6F0S0	01Y41Y41M(31M)61M(31M21M)61M	2	0.0960146		0.0891724	0.0925935	0.00342107	0.000241084
Q96CN4	EVI5L_HUMAN	EVI5-like protein	SMNGSRR	S1dEN3GlcNAc	59	N2H6F0S0	01Y41Y41M(31M21M)61M(31M)61M	2	0.0960146		0.0891724	0.0925935	0.00342107	0.000241084
Q96M02	CJ090_HUMAN	(E2-independent) E3 ubiquitin-conjugating enzyme FATS	QSLANR	Q1dEN5GlcNAc	90	N2H9F0S0	01Y41Y41M(31M21M21M31G)61M(31M21M)61M	1	4.4594	6.46876	9.43765	6.78861	2.04491	0.00098885
Q96M02	CJ090_HUMAN	(E2-independent) E3 ubiquitin-conjugating enzyme FATS	QSLANR	Q1dEN5GlcNAc	90	N2H9F0S0	01Y41Y41M(31M21M21M)61M(31M21M)61M21M	1	6.33256	6.46876	9.43765	7.41299	1.43273	0.000105827
Q96NL8	CH037_HUMAN	Protein C8orf37	SSGNTSVR	S1dEN4GlcNAc	90	N2H6F0S0	01Y41Y41M(31M)61M(31M21M)61M	1	0.0960146		0.0891724	0.0925935	0.00342107	0.000241084
Q96NL8	CH037_HUMAN	Protein C8orf37	SSGNTSVR	S1dEN4GlcNAc	90	N2H6F0S0	01Y41Y41M(31M21M)61M(31M)61M	1	0.0960146		0.0891724	0.0925935	0.00342107	0.000241084
Q96RU2	UBP28_HUMAN	Ubiquitin carboxyl-terminal hydrolase 28	NVGNTCWFSAVIQSLFQLPEFR	N1dEN4GlcNAcC6Cam	169	N2H9F0S0	01Y41Y41M(31M21M21M)61M(31M21M)61M21M	1	0.384978		0.398893	0.391935	0.00695742	0.000358935
Q96SR6	ZN382_HUMAN	Zinc finger protein 382	THTGEKPYICNECGKSFCQK	T1dEK6dEC10CamN11GlcNAcC13CamK15dEC18CamK20dE	439	N2H9F0S0	01Y41Y41M(31M21M21M31G)61M(31M21M)61M	1		0.471259	0.486755	0.479007	0.00774786	0.000482486
Q9H1C0	LPAR5_HUMAN	Lysophosphatidic acid receptor 5	TSATNGTR	T1dEN5GlcNAc	323	N2H6F0S0	01Y41Y41M(31M)61M(31M21M)61M	1	0.0960146		0.0891724	0.0925935	0.00342107	0.000241084	Down	Cancer Res, 2009, 69, 5441-5449
Q9H2Y7	ZN106_HUMAN	Zinc finger protein 106	DITGNK	D1dEN5GlcNAcK6dE	370	N2H8F0S0	01Y41Y41M(31M21M)61M(31M21M)61M21M	1	3.82629	2.59738		3.21184	0.614452	0.027298
Q9H2Y7	ZN106_HUMAN	Zinc finger protein 106	DITGNK	D1dEN5GlcNAcK6dE	370	N2H8F0S0	01Y41Y41M(31M21M21M)61M(31M21M)61M	1	3.82629	2.59738		3.21184	0.614452	0.027298
Q9H611	PIF1_HUMAN	ATP-dependent DNA helicase PIF1	NLSVSR	N1GlcNAc@dE	486	N2H6F0S0	01Y41Y41M(31M)61M(31M21M)61M	1	0.245658	0.239625		0.242642	0.00301623	7.70395e-05	Down	Plos One, 2012, 7, e30748
Q9H611	PIF1_HUMAN	ATP-dependent DNA helicase PIF1	NLSVSR	N1GlcNAc@dE	486	N2H6F0S0	01Y41Y41M(31M21M)61M(31M)61M	1	0.245658	0.239625		0.242642	0.00301623	7.70395e-05	Down	Plos One, 2012, 7, e30748
Q9H611	PIF1_HUMAN	ATP-dependent DNA helicase PIF1	NLSVSR	N1GlcNAc@dE	486	N2H8F0S0	01Y41Y41M(31M21M)61M(31M21M)61M21M	1	0.251684	0.306253	0.28327	0.280402	0.0223695	2.37399e-05	Down	Plos One, 2012, 7, e30748
Q9H611	PIF1_HUMAN	ATP-dependent DNA helicase PIF1	NLSVSR	N1GlcNAc@dE	486	N2H8F0S0	01Y41Y41M(31M21M21M)61M(31M21M)61M	1	0.251684	0.306253	0.28327	0.280402	0.0223695	2.37399e-05	Down	Plos One, 2012, 7, e30748
Q9H611	PIF1_HUMAN	ATP-dependent DNA helicase PIF1	NLSVSR	N1GlcNAc@dE	486	N2H7F0S0	01Y41Y41M(31M)61M(31M21M)61M21M	1		0.286524	0.329933	0.308229	0.0217042	0.00355745	Down	Plos One, 2012, 7, e30748
Q9H611	PIF1_HUMAN	ATP-dependent DNA helicase PIF1	NLSVSR	N1GlcNAc@dE	486	N2H7F0S0	01Y41Y41M(31M21M)61M(31M21M)61M	1		0.286524	0.329933	0.308229	0.0217042	0.00355745	Down	Plos One, 2012, 7, e30748
Q9UBE8	NLK_HUMAN	Serine/threonine-protein kinase NLK	NLSSVR	N1GlcNAc@dE	470	N2H6F0S0	01Y41Y41M(31M)61M(31M21M)61M	1	0.245658	0.239625		0.242642	0.00301623	7.70395e-05
Q9UBE8	NLK_HUMAN	Serine/threonine-protein kinase NLK	NLSSVR	N1GlcNAc@dE	470	N2H6F0S0	01Y41Y41M(31M21M)61M(31M)61M	1	0.245658	0.239625		0.242642	0.00301623	7.70395e-05
Q9UBE8	NLK_HUMAN	Serine/threonine-protein kinase NLK	NLSSVR	N1GlcNAc@dE	470	N2H8F0S0	01Y41Y41M(31M21M)61M(31M21M)61M21M	1	0.251684	0.306253	0.28327	0.280402	0.0223695	2.37399e-05
Q9UBE8	NLK_HUMAN	Serine/threonine-protein kinase NLK	NLSSVR	N1GlcNAc@dE	470	N2H8F0S0	01Y41Y41M(31M21M21M)61M(31M21M)61M	1	0.251684	0.306253	0.28327	0.280402	0.0223695	2.37399e-05
Q9UBE8	NLK_HUMAN	Serine/threonine-protein kinase NLK	NLSSVR	N1GlcNAc@dE	470	N2H7F0S0	01Y41Y41M(31M)61M(31M21M)61M21M	1		0.286524	0.329933	0.308229	0.0217042	0.00355745
Q9UBE8	NLK_HUMAN	Serine/threonine-protein kinase NLK	NLSSVR	N1GlcNAc@dE	470	N2H7F0S0	01Y41Y41M(31M21M)61M(31M21M)61M	1		0.286524	0.329933	0.308229	0.0217042	0.00355745
Q9Y252	RNF6_HUMAN	E3 ubiquitin-protein ligase RNF6	SNVTVR	S1dEN2GlcNAc	288	N2H6F0S0	01Y41Y41M(31M)61M(31M21M)61M	1	0.245658	0.239625		0.242642	0.00301623	7.70395e-05	Down	Oncotarget, 2017, 8, 20103-20112
Q9Y252	RNF6_HUMAN	E3 ubiquitin-protein ligase RNF6	SNVTVR	S1dEN2GlcNAc	288	N2H6F0S0	01Y41Y41M(31M21M)61M(31M)61M	1	0.245658	0.239625		0.242642	0.00301623	7.70395e-05	Down	Oncotarget, 2017, 8, 20103-20112
Q9Y252	RNF6_HUMAN	E3 ubiquitin-protein ligase RNF6	SNVTVR	S1dEN2GlcNAc	288	N2H8F0S0	01Y41Y41M(31M21M)61M(31M21M)61M21M	1	0.251684	0.306253	0.28327	0.280402	0.0223695	2.37399e-05	Down	Oncotarget, 2017, 8, 20103-20112
Q9Y252	RNF6_HUMAN	E3 ubiquitin-protein ligase RNF6	SNVTVR	S1dEN2GlcNAc	288	N2H8F0S0	01Y41Y41M(31M21M21M)61M(31M21M)61M	1	0.251684	0.306253	0.28327	0.280402	0.0223695	2.37399e-05	Down	Oncotarget, 2017, 8, 20103-20112
Q9Y252	RNF6_HUMAN	E3 ubiquitin-protein ligase RNF6	SNVTVR	S1dEN2GlcNAc	288	N2H7F0S0	01Y41Y41M(31M)61M(31M21M)61M21M	1		0.286524	0.329933	0.308229	0.0217042	0.00355745	Down	Oncotarget, 2017, 8, 20103-20112
Q9Y252	RNF6_HUMAN	E3 ubiquitin-protein ligase RNF6	SNVTVR	S1dEN2GlcNAc	288	N2H7F0S0	01Y41Y41M(31M21M)61M(31M21M)61M	1		0.286524	0.329933	0.308229	0.0217042	0.00355745	Down	Oncotarget, 2017, 8, 20103-20112
Q9Y262	EIF3L_HUMAN	Eukaryotic translation initiation factor 3 subunit L	FEELNR	F1dEN5GlcNAc	554	N2H6F0S0	01Y41Y41M(31M)61M(31M21M)61M	1	0.0960146		0.0891724	0.0925935	0.00342107	0.000241084	Down	Oncogene (2010) 29, 4080–4089
Q9Y262	EIF3L_HUMAN	Eukaryotic translation initiation factor 3 subunit L	FEELNR	F1dEN5GlcNAc	554	N2H6F0S0	01Y41Y41M(31M21M)61M(31M)61M	1	0.0960146		0.0891724	0.0925935	0.00342107	0.000241084	Down	Oncogene (2010) 29, 4080–4089
Q9Y2P8	RCL1_HUMAN	RNA 3'-terminal phosphate cyclase-like protein	ITNGSR	I1dEN3GlcNAc	60	N2H7F0S0	01Y41Y41M(31M21M)61M(31M21M)61M	1		0.247654	0.190883	0.219269	0.0283859	0.00720067
Q9Y2P8	RCL1_HUMAN	RNA 3'-terminal phosphate cyclase-like protein	ITNGSR	I1dEN3GlcNAc	60	N2H7F0S0	01Y41Y41M(31M21M21M)61M(31M)61M	1		0.247654	0.190883	0.219269	0.0283859	0.00720067
Q9Y2P8	RCL1_HUMAN	RNA 3'-terminal phosphate cyclase-like protein	ITNGSR	I1dEN3GlcNAc	60	N2H8F0S0	01Y41Y41M(31M21M)61M(31M21M)61M21M	1	0.255373		0.232692	0.244032	0.0113405	0.00108368
Q9Y2P8	RCL1_HUMAN	RNA 3'-terminal phosphate cyclase-like protein	ITNGSR	I1dEN3GlcNAc	60	N2H8F0S0	01Y41Y41M(31M21M21M)61M(31M21M)61M	1	0.255373	0.318271	0.232692	0.268778	0.0362009	0.000141119
Q9Y4P3	TBL2_HUMAN	Transducin beta-like protein 2	RASNESTR	R1dEN4GlcNAc	421	N2H8F0S0	01Y41Y41M(31M21M21M)61M(31M21M)61M	1		0.0906209	0.0906042	0.0906126	8.36244e-06	1.47722e-09	Up	Journal of Cellular Biochemistry, 2013, 114:2170–2187
Q9Y4P3	TBL2_HUMAN	Transducin beta-like protein 2	RASNESTR	R1dEN4GlcNAc	421	N2H8F0S0	01Y41Y41M(31M21M21M31G)61M(31M)61M	1		0.0906209	0.0906042	0.0906126	8.36244e-06	1.47722e-09	Up	Journal of Cellular Biochemistry, 2013, 114:2170–2187
